# Supplementary material for: Novel Biopolymer-Based Catalyst for the Multicomponent Synthesis of N-aryl-4-aryl-Substituted Dihydropyridines Derived from Simple and Complex Anilines
Source: MDPI journal article supplement (doi:10.3390/molecules29081884), 2024-04-20
Supplement: s1 [file s1]

**1.1. Product 5a: 2-amino-7,8-dimethyl-5-oxo-1,4-diphenyl-1,4,5,6,7,8 hexahydroquinoline-3-carbonitrile**

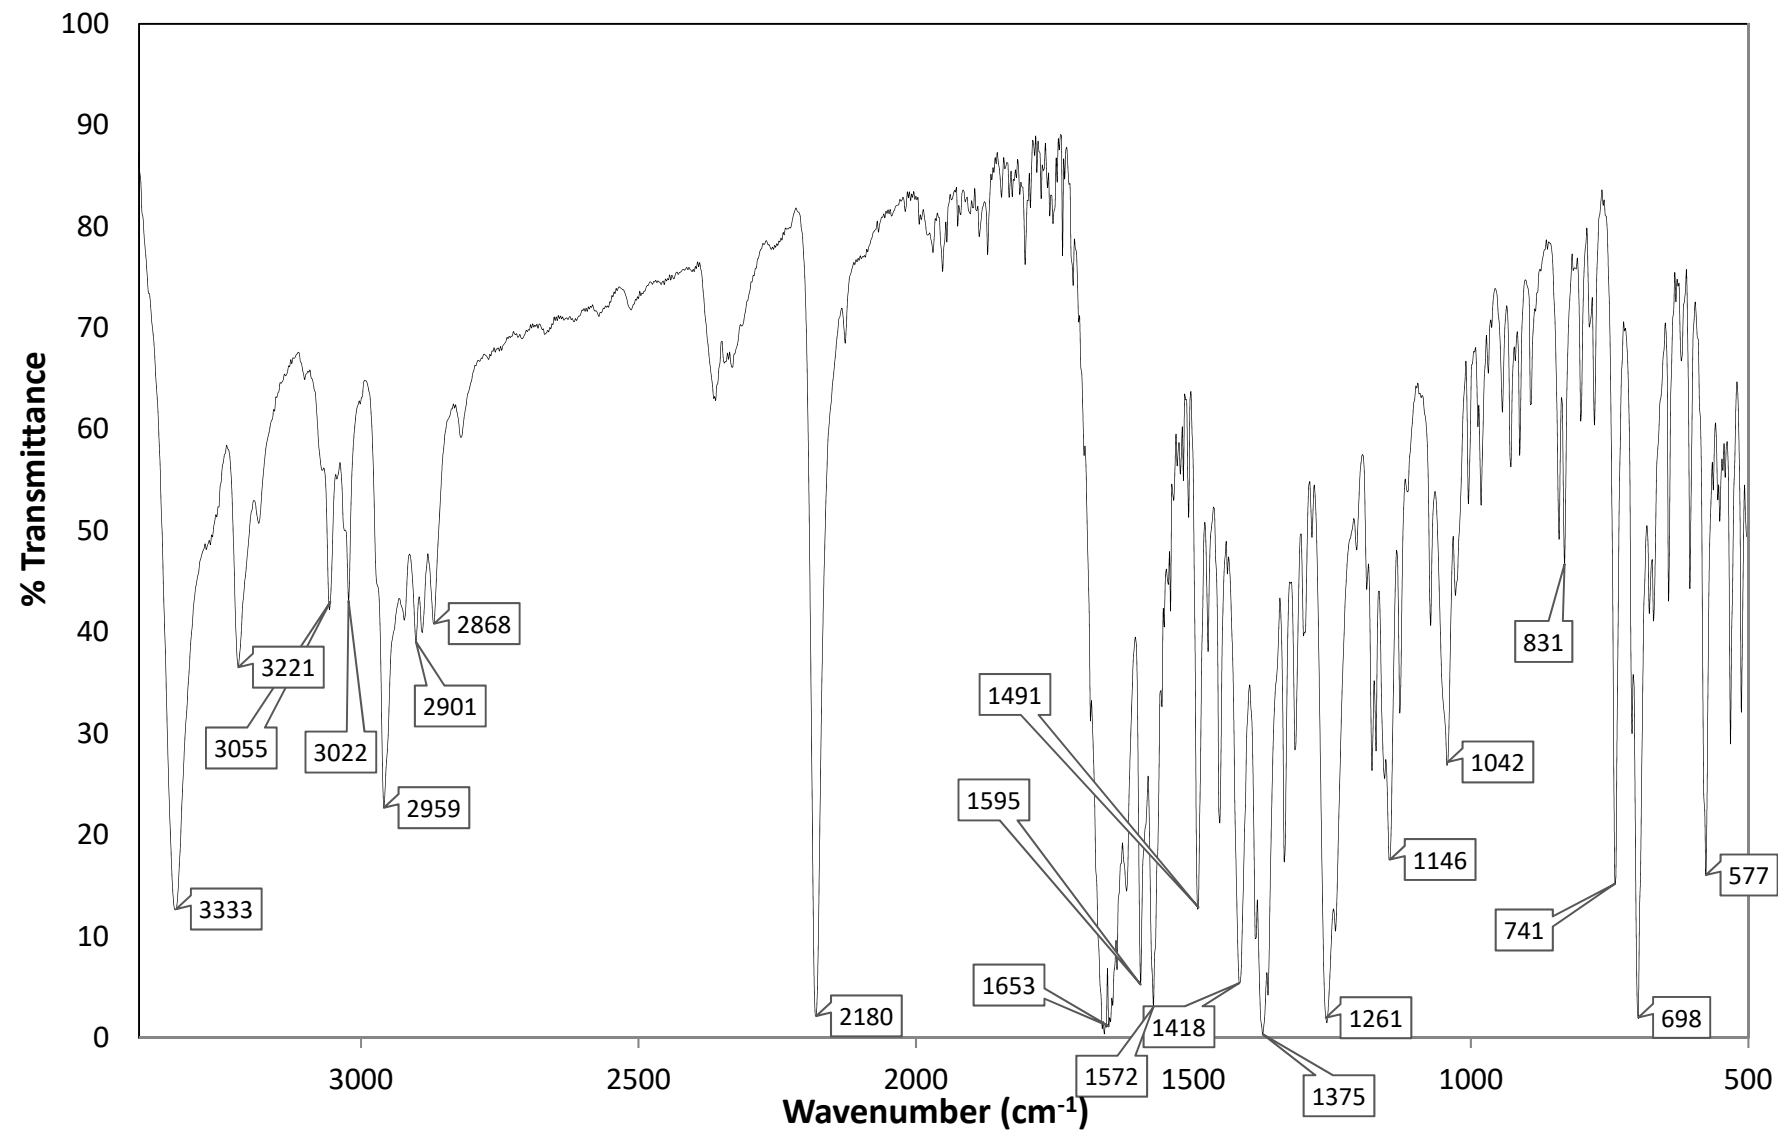

*Figure S1 - IR spectrum of 5a*

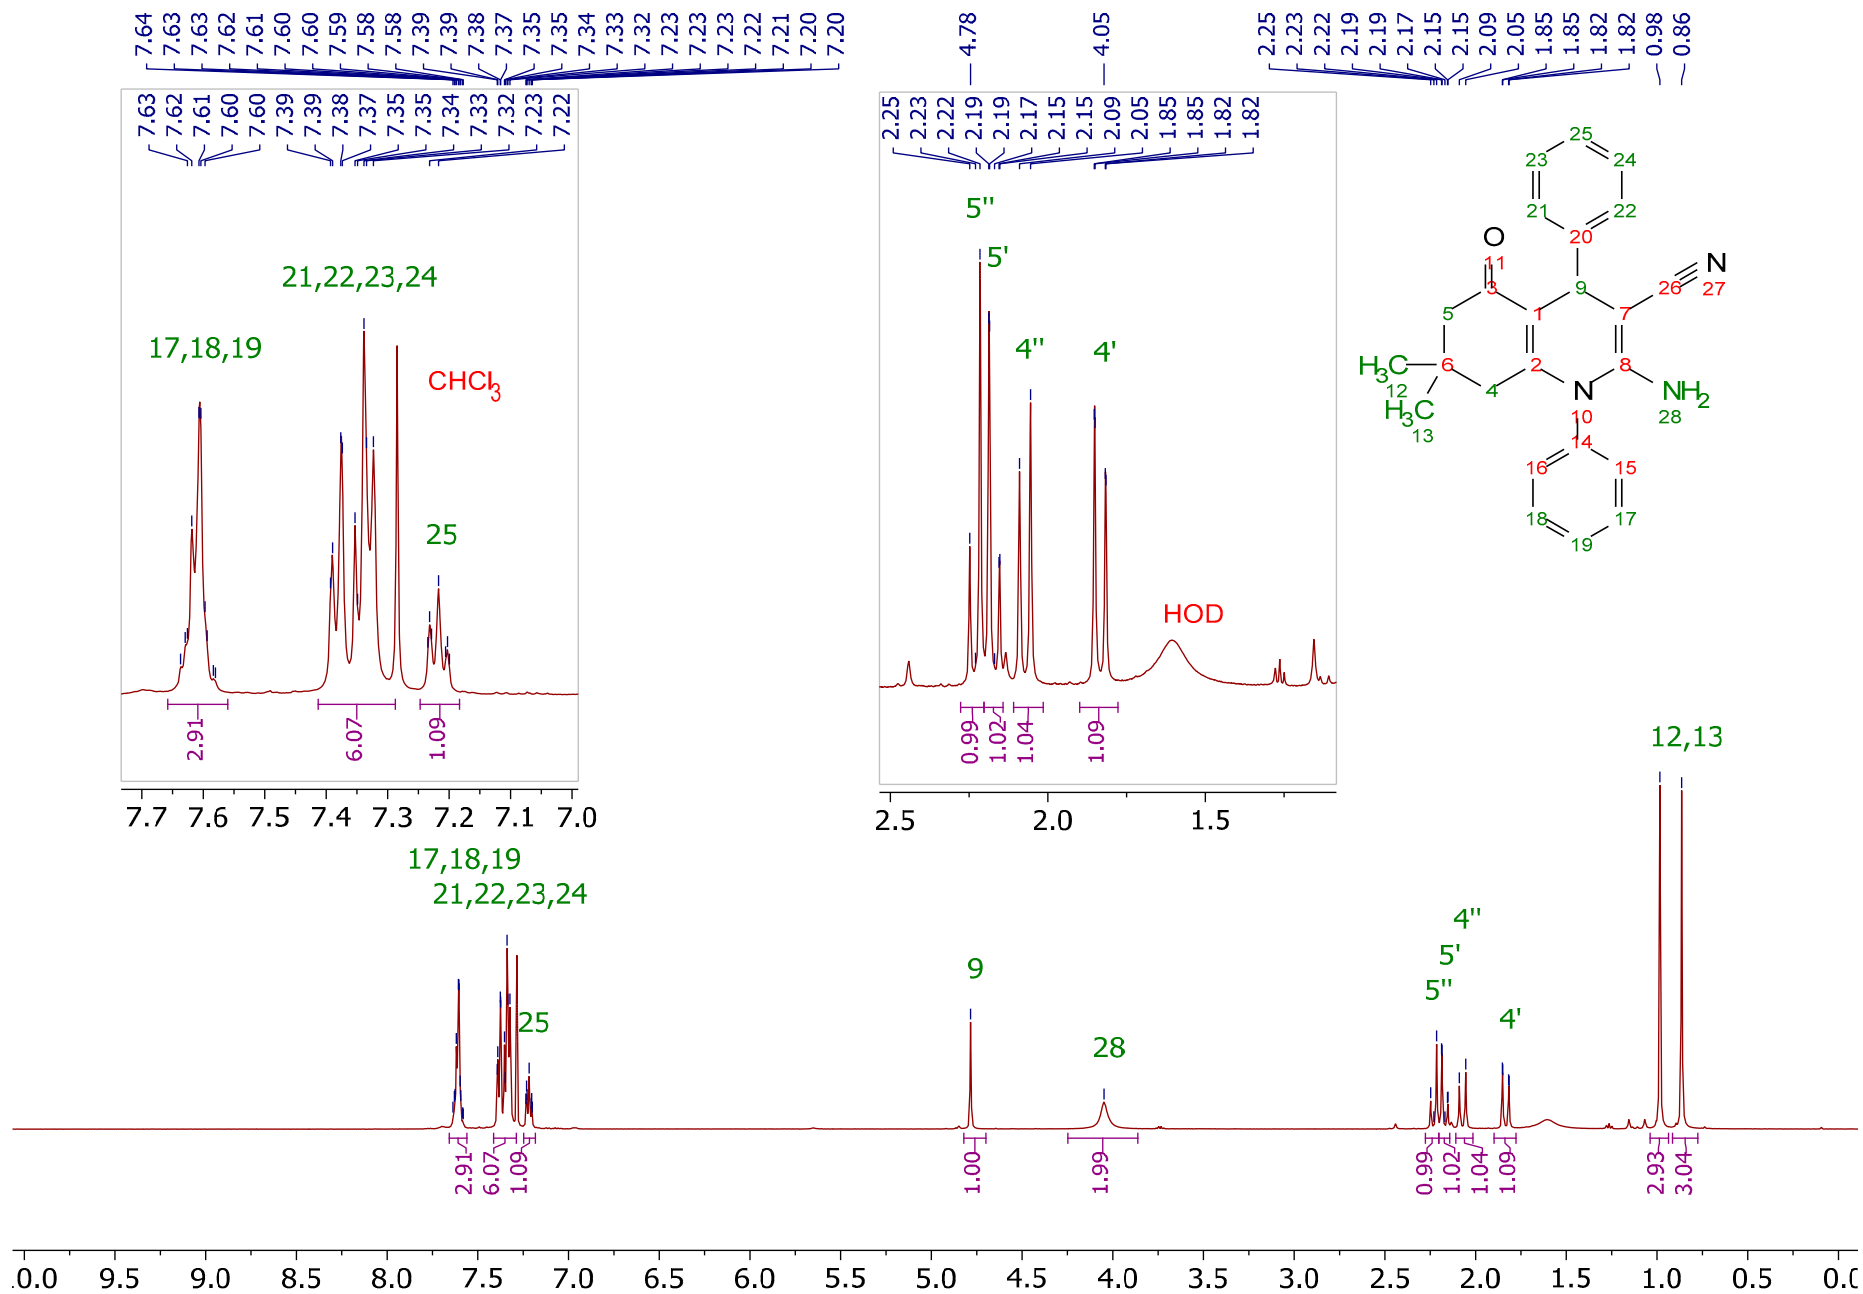

Figure S2 - <sup>1</sup>H NMR spectrum of 5a

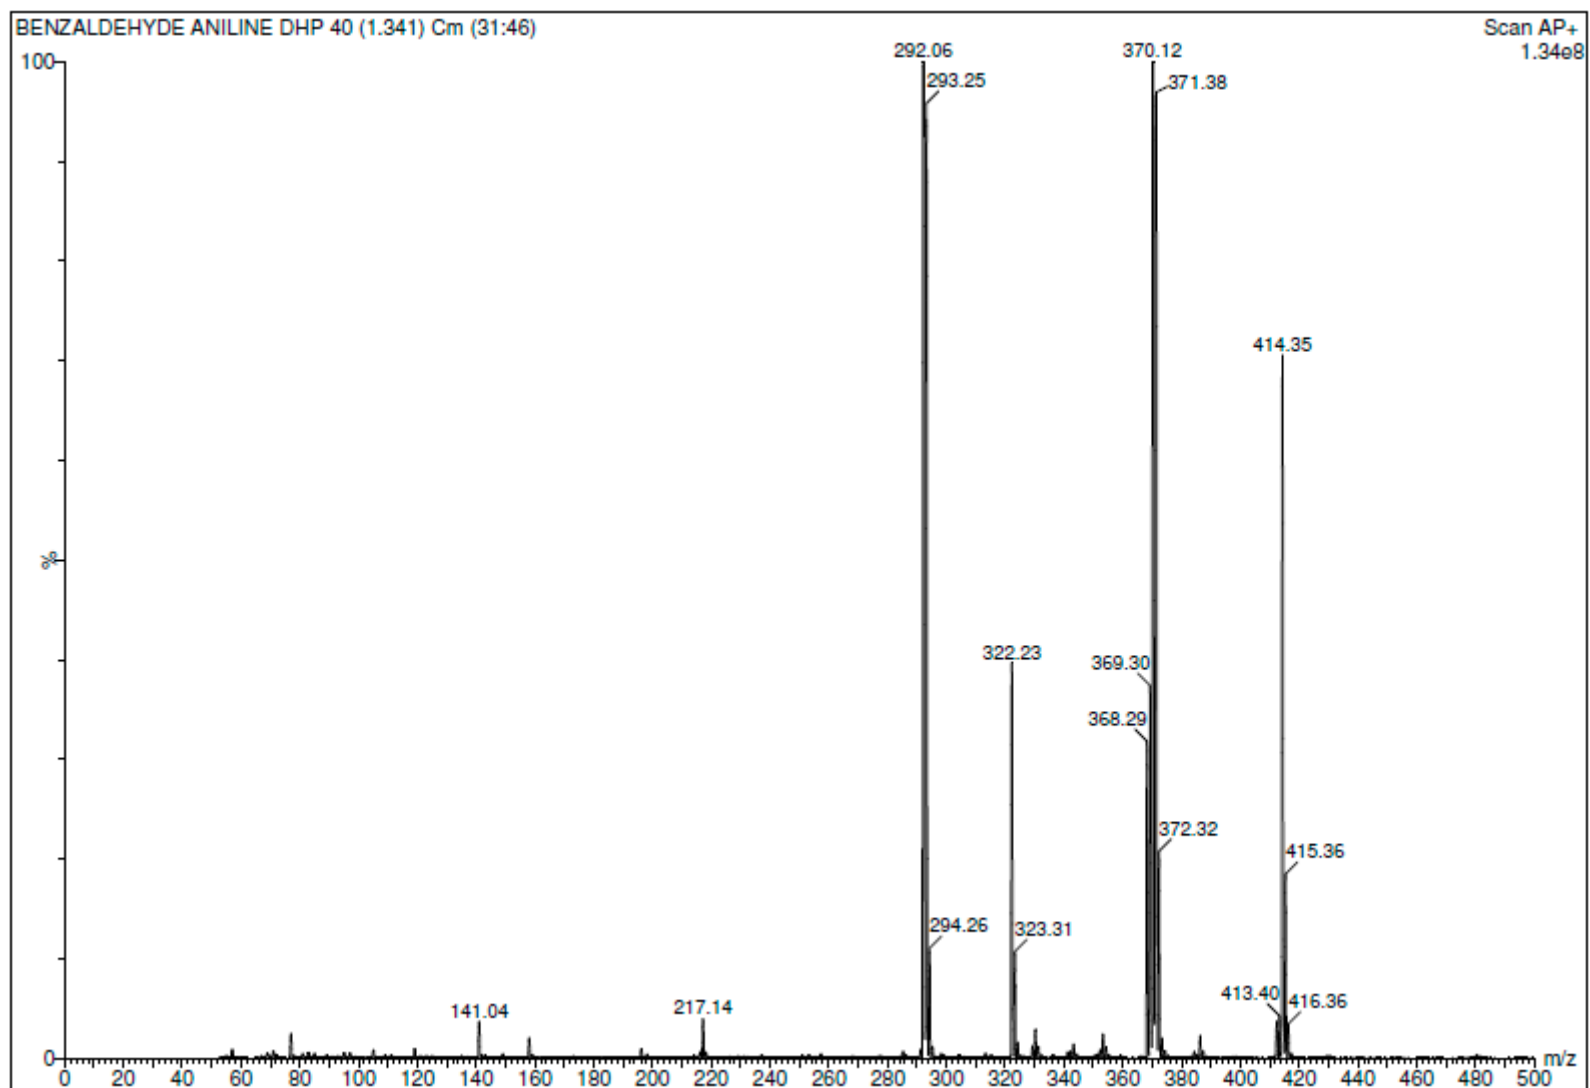

Figure S3 - MS spectrum of 5a

Table S1 - Fragmentation positions for peaks in MS spectrum of 5a

| <u>m/z</u>                                | <u>Fragmentation position and structure</u>                                                                 |
|-------------------------------------------|-------------------------------------------------------------------------------------------------------------|
| <p><b>370.12</b></p> <p><b>323.31</b></p> | <p>[M-H]<sup>+</sup></p> 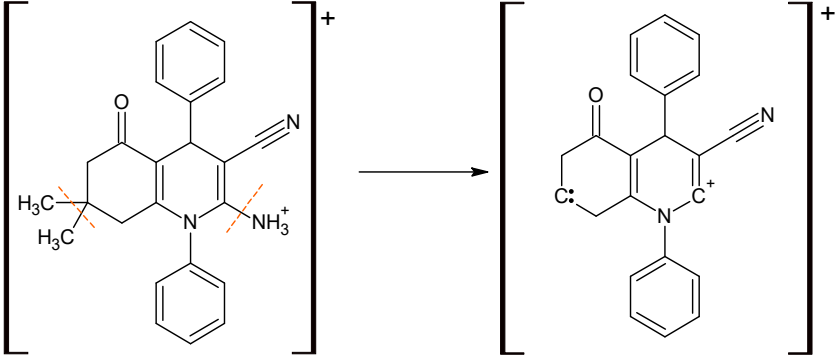 |
| <p><b>292.06</b></p>                      |                           |
| <p><b>217.14</b></p>                      |                          |



**1.2. Product 5b: 2-amino-7,8-dimethyl-4-(4-methylphenyl)-5-oxo-1-phenyl-1,4,5,6,7,8-hexahydroquinoline-3-carbonitrile**

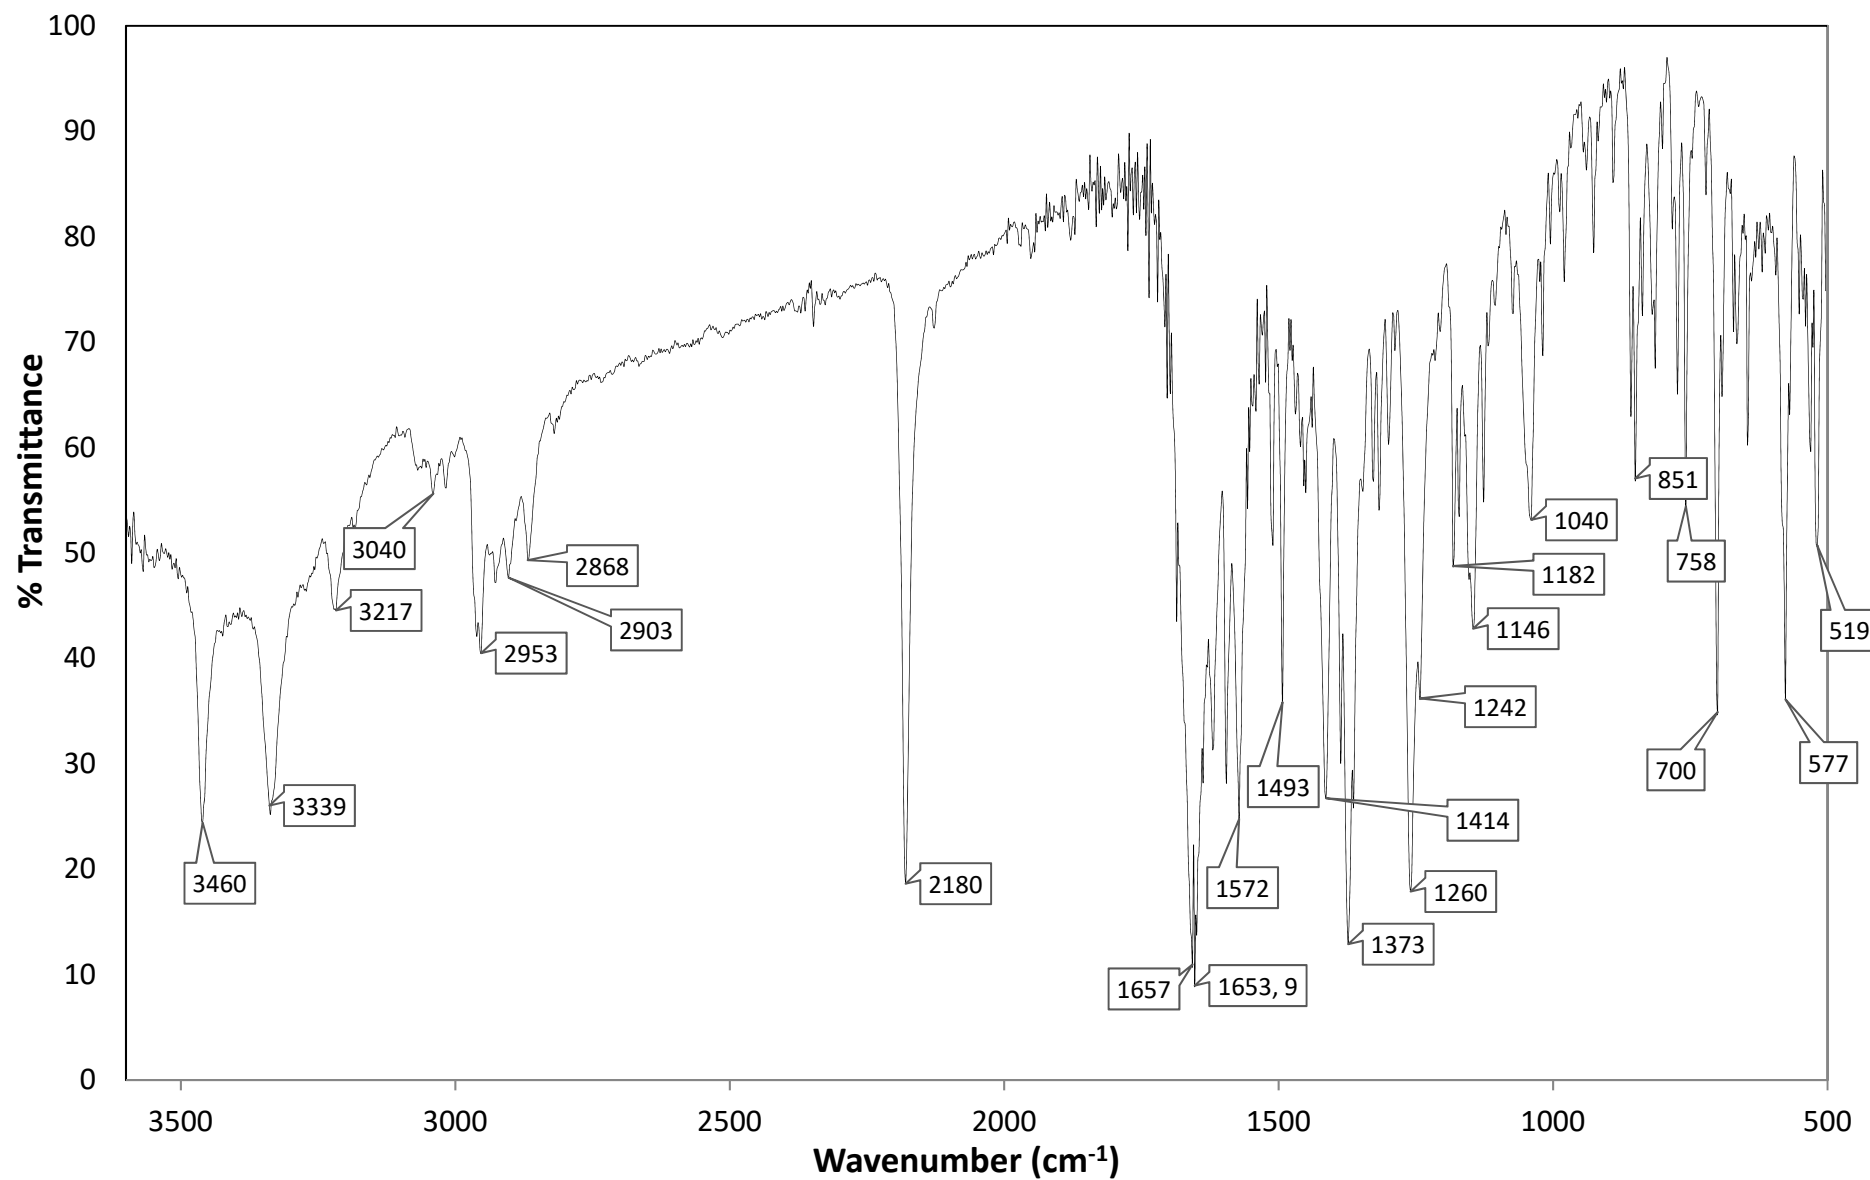

*Figure S4 - IR spectrum of 5b*



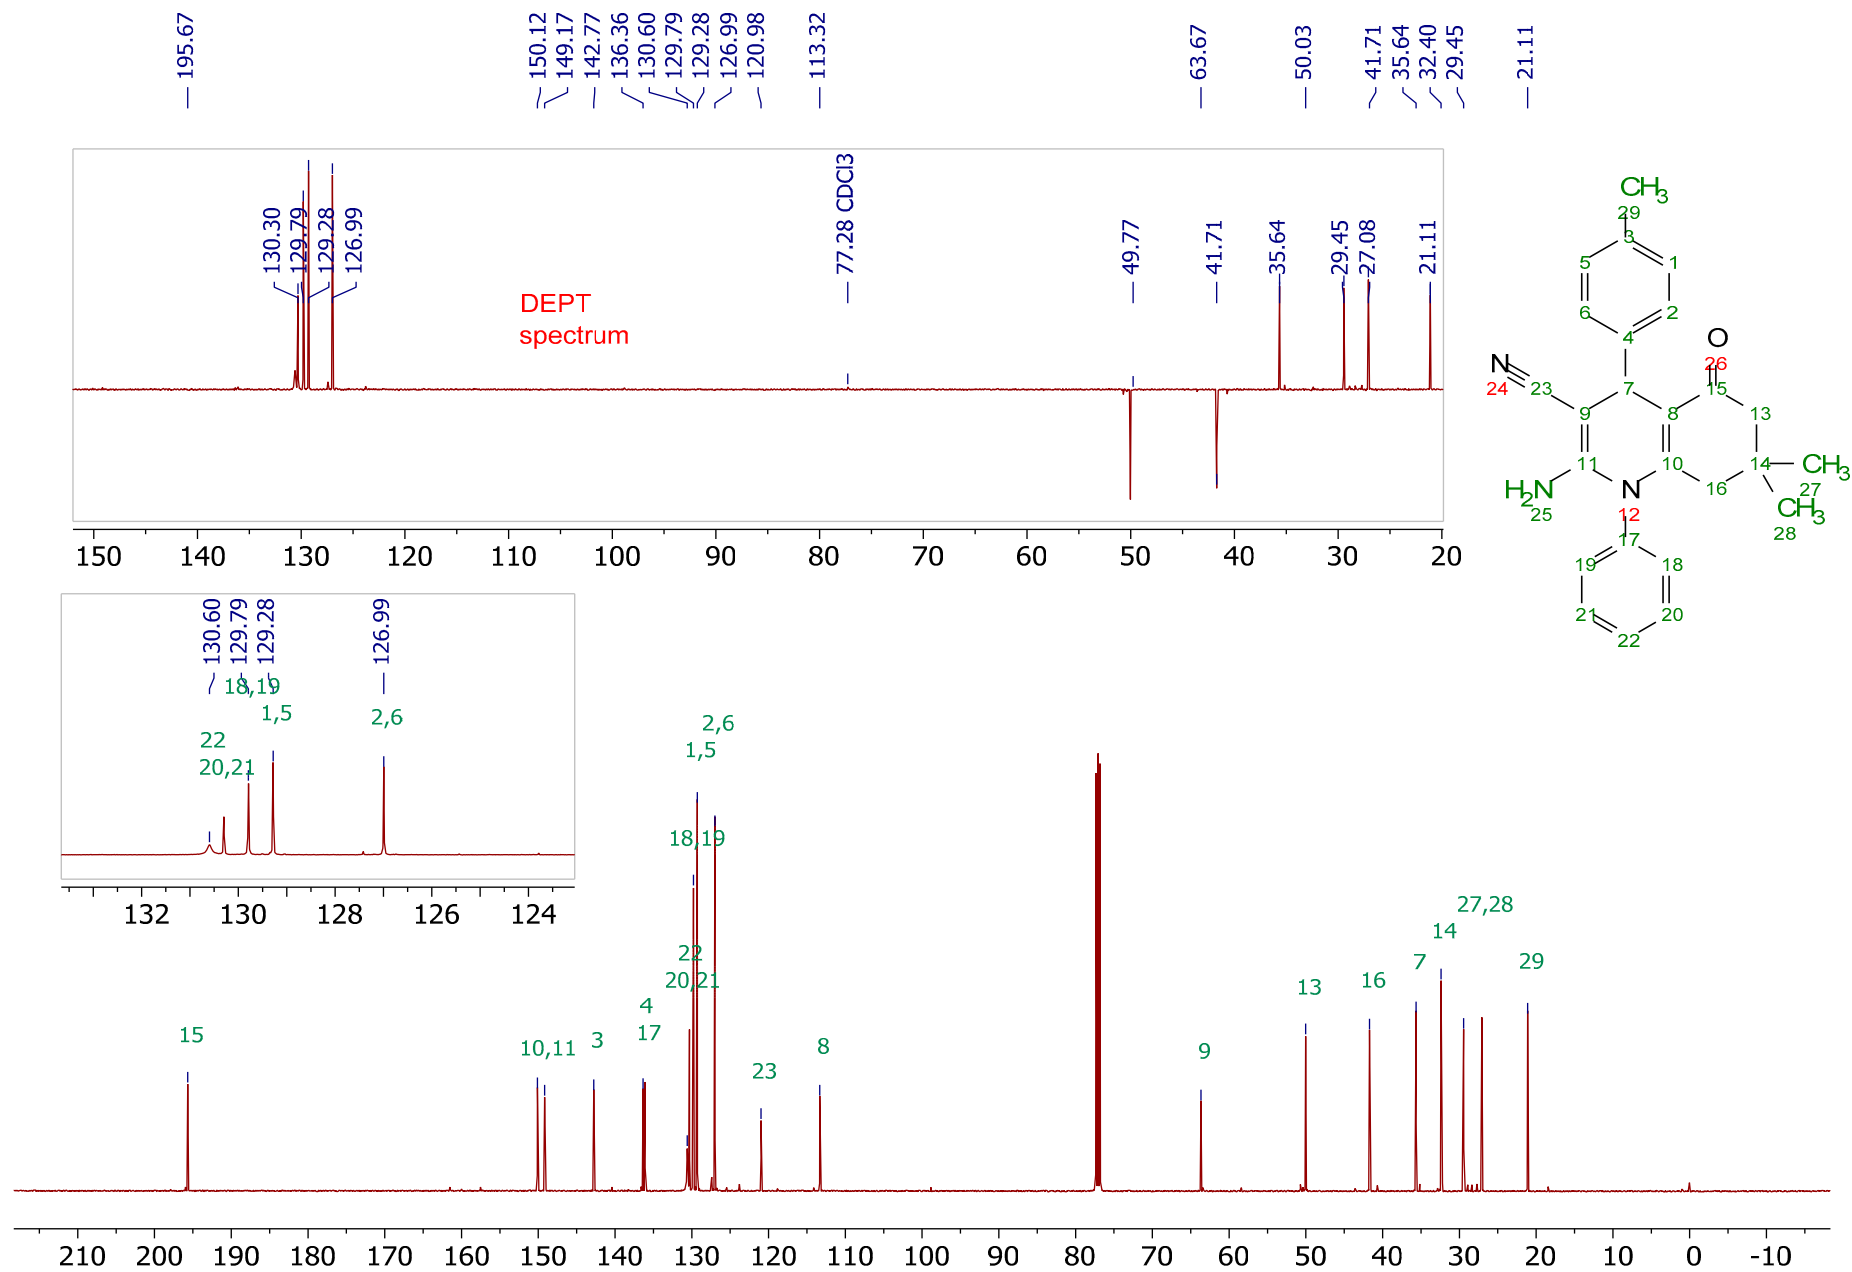

Figure S6 – <sup>13</sup>C NMR spectrum of 5b with inset expansion and DEPT spectrum

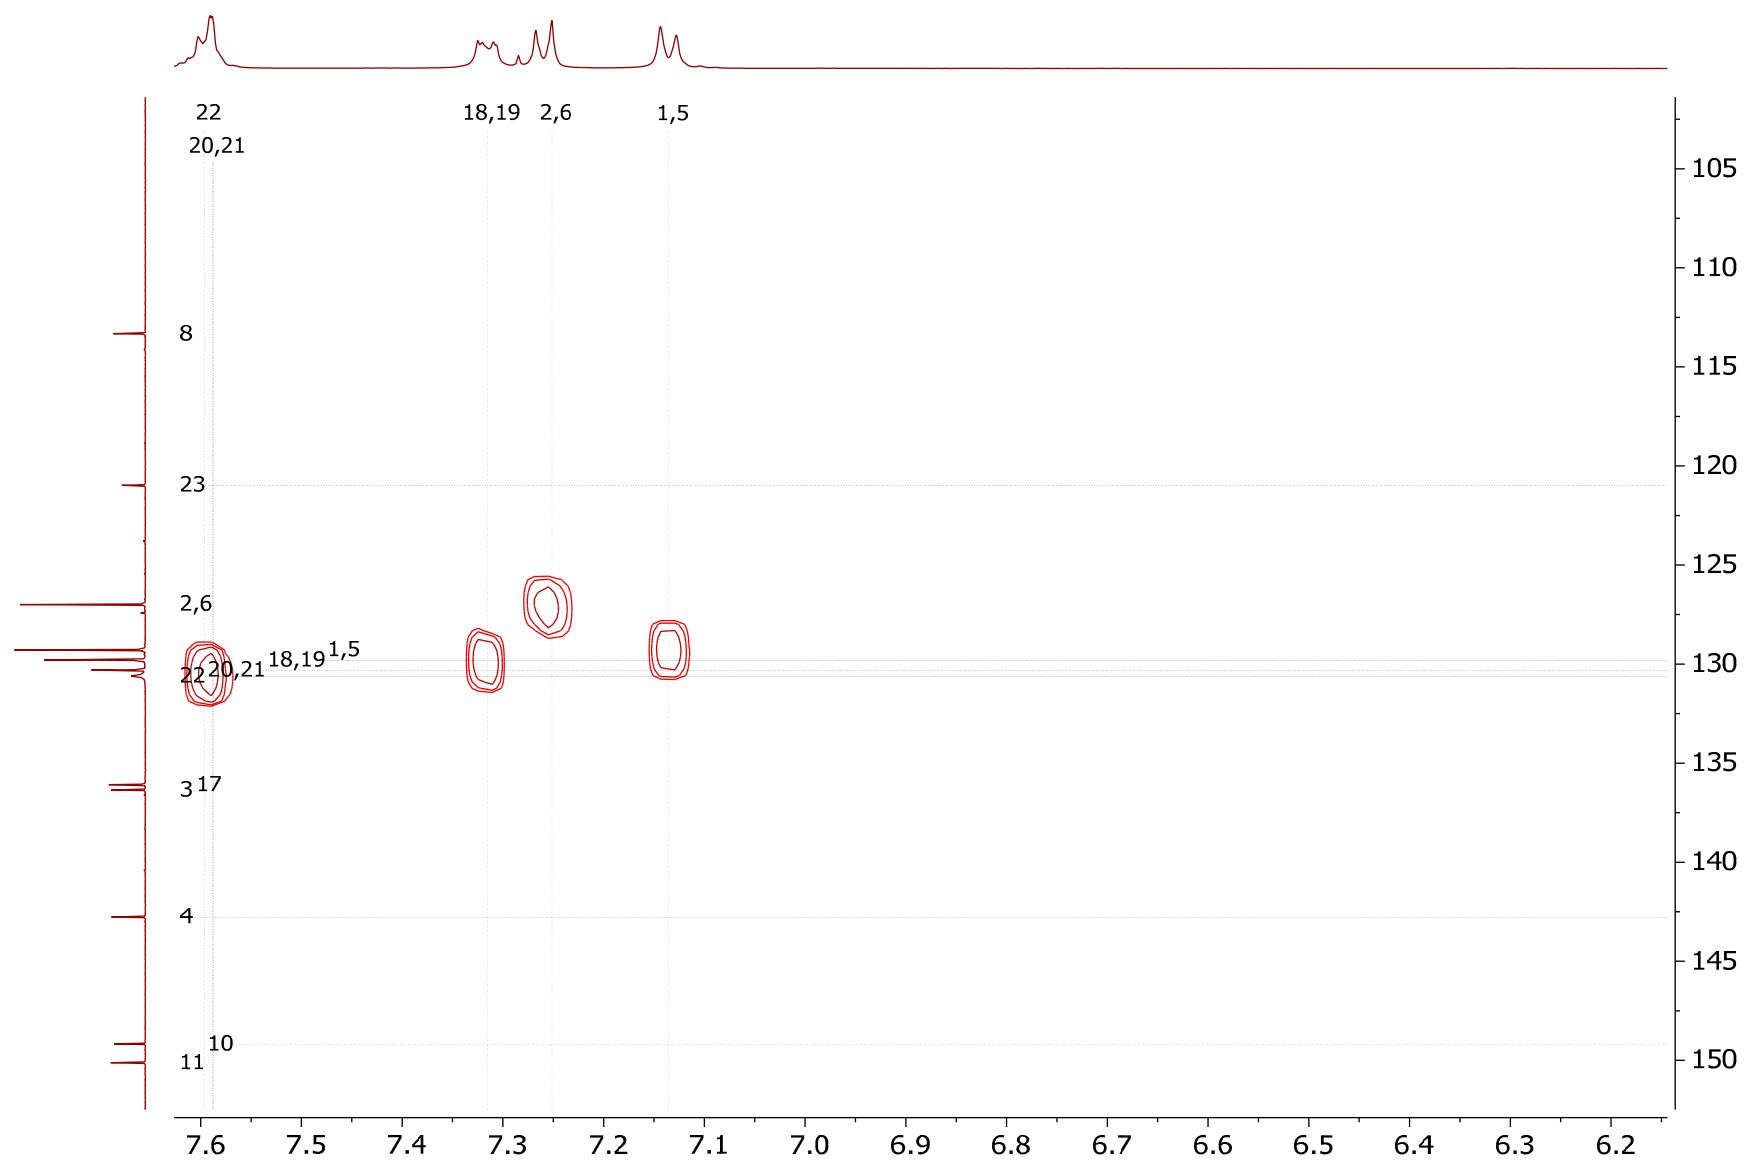

Figure S7 - HSQC spectrum of 5b

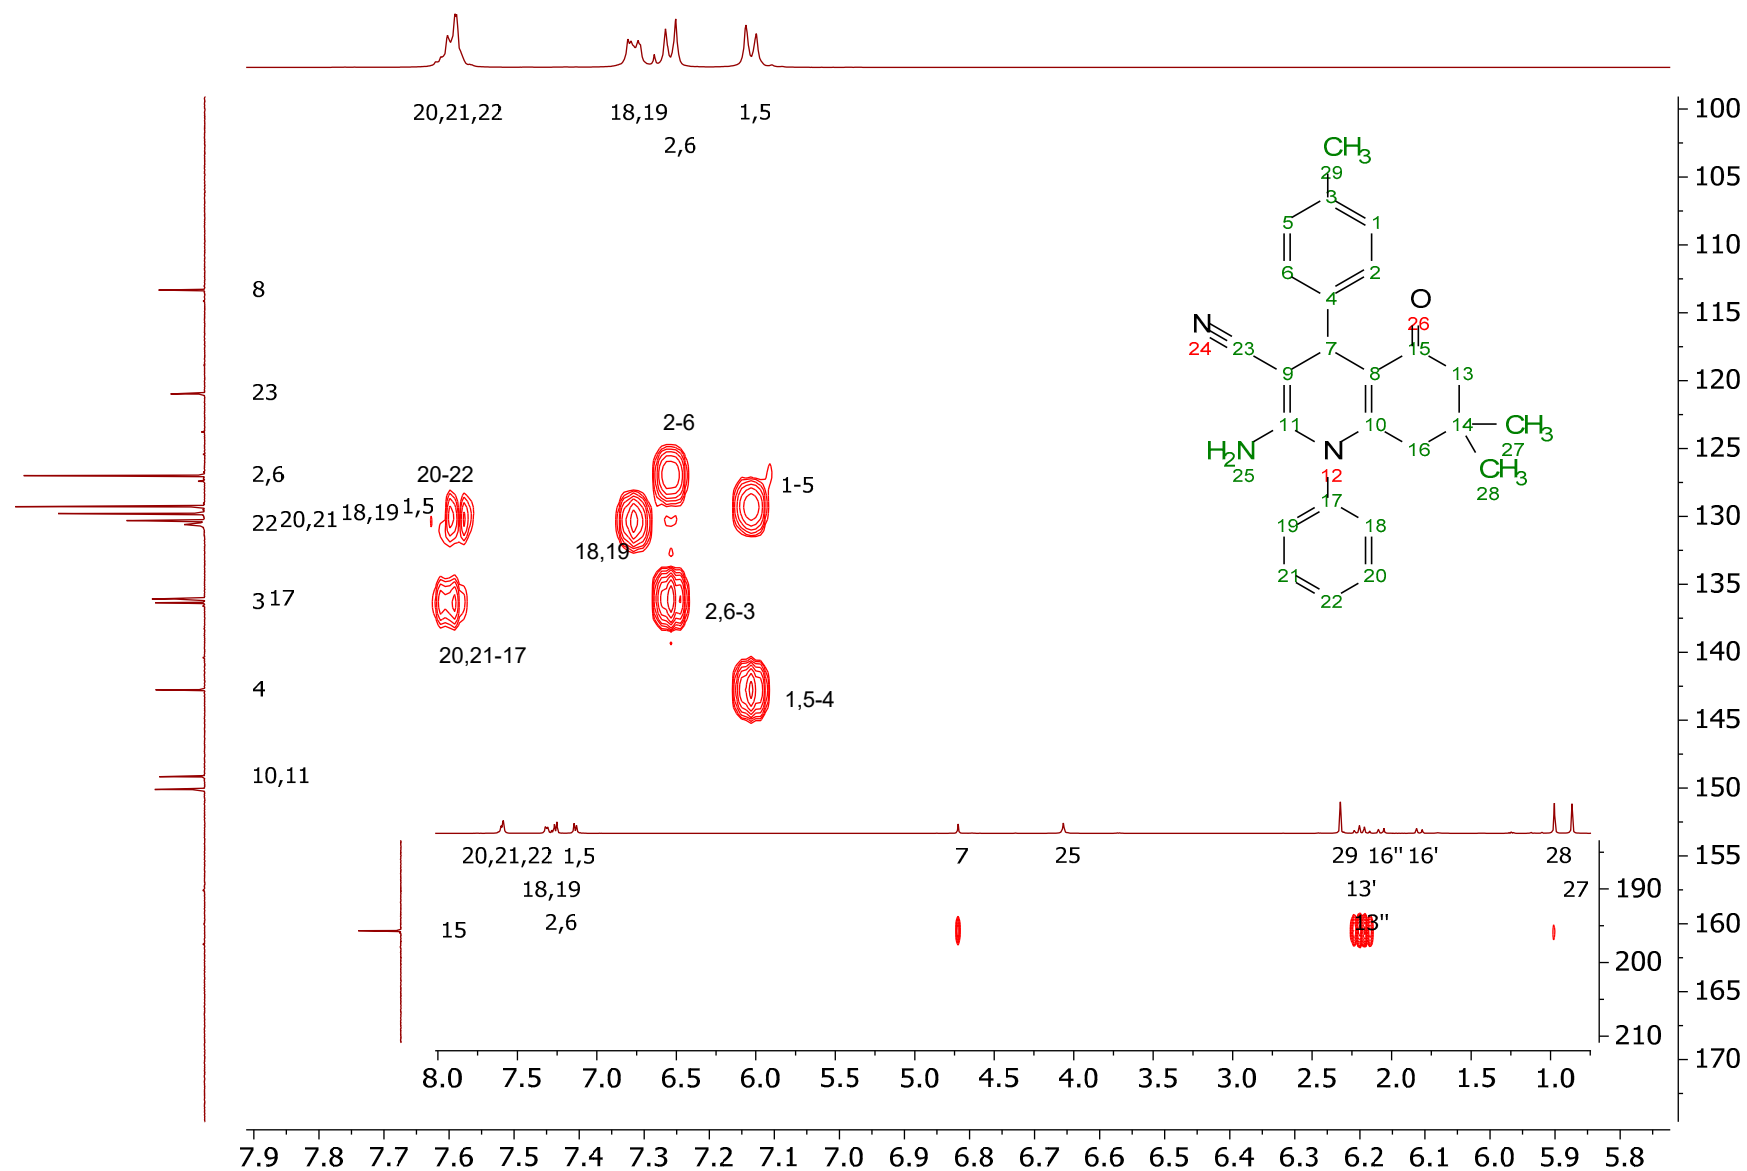

Figure S8 - Downfield region of HMBC spectrum of **5b**

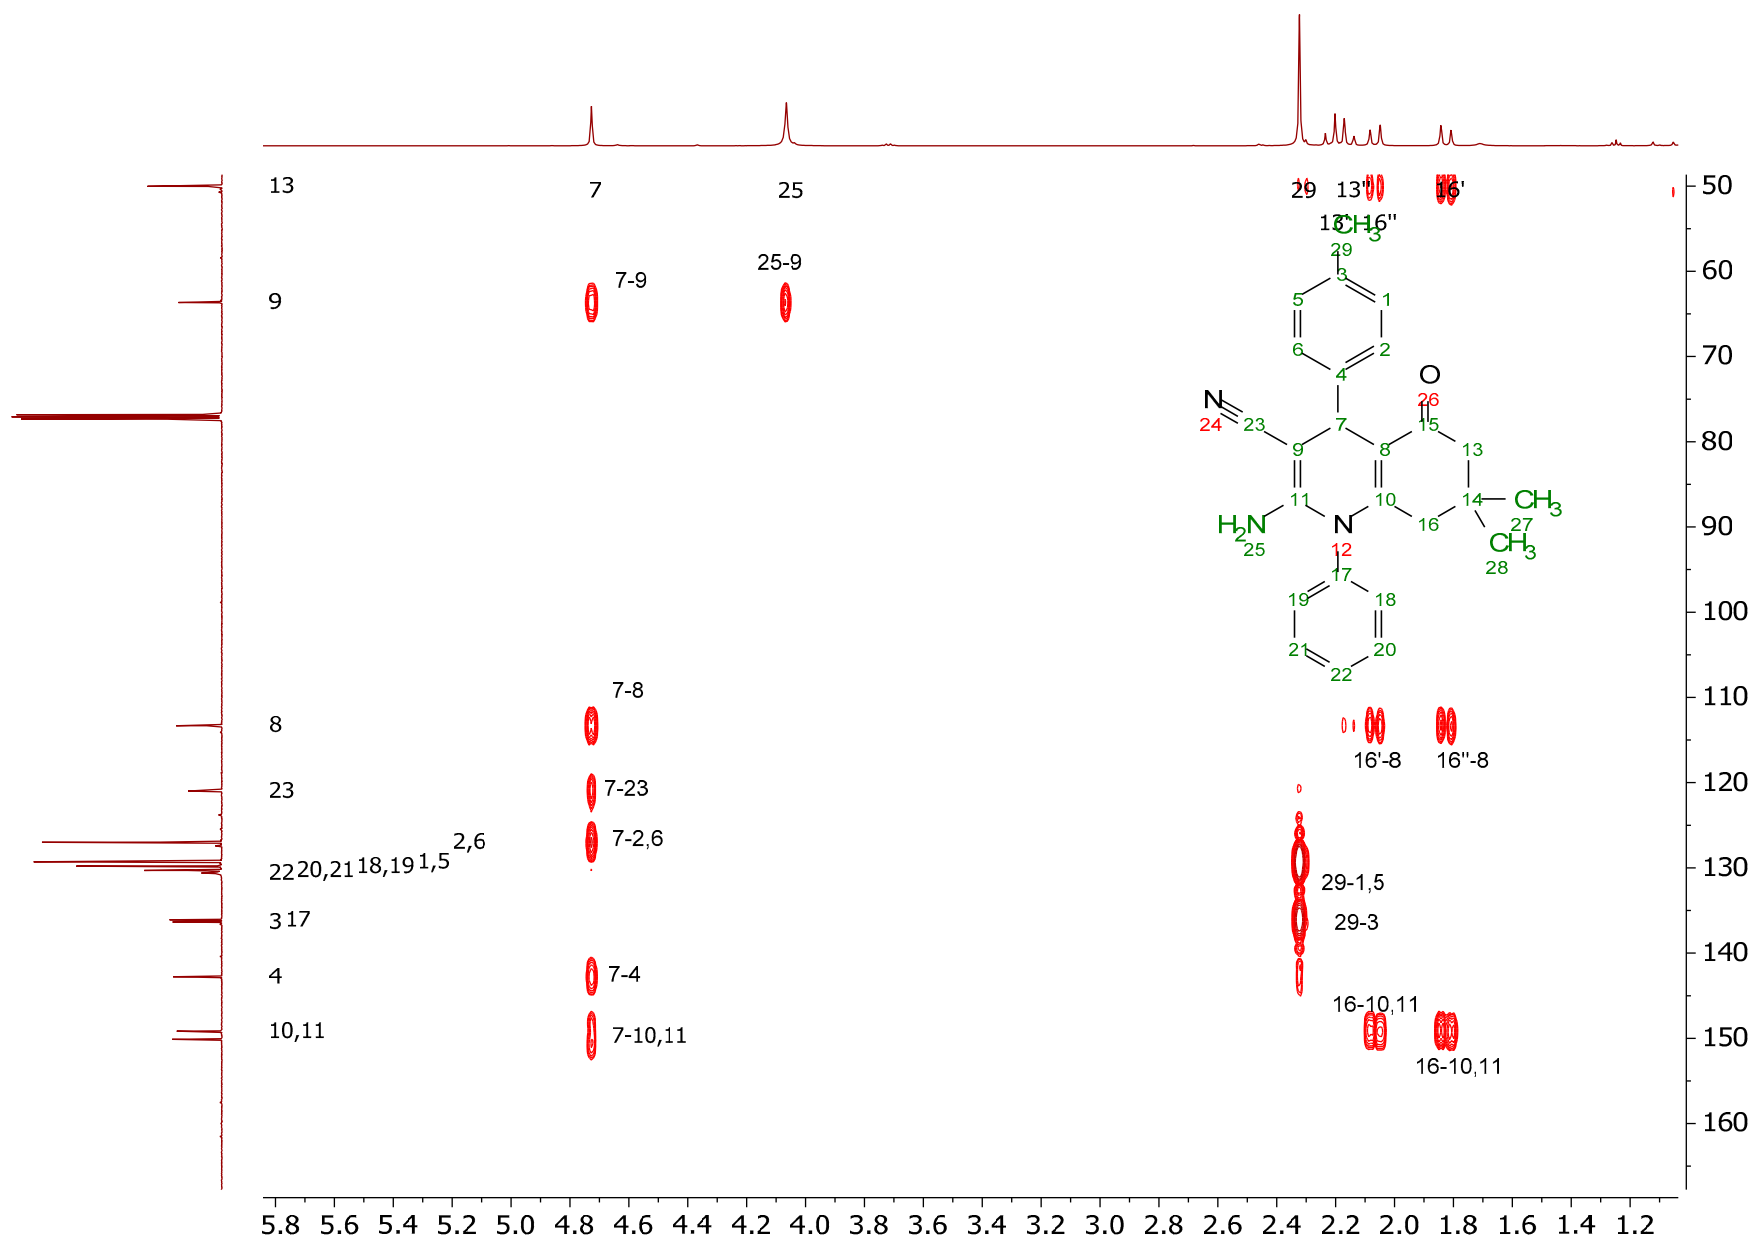

Figure S9 - Upfield region of HMBC spectrum of 5b

**1.3. Product 5c: 2-amino-4-(4-chlorophenyl)-7,8-dimethyl-5-oxo-1-phenyl-1,4,5,6,7,8-hexahydroquinoline-3-carbonitrile**

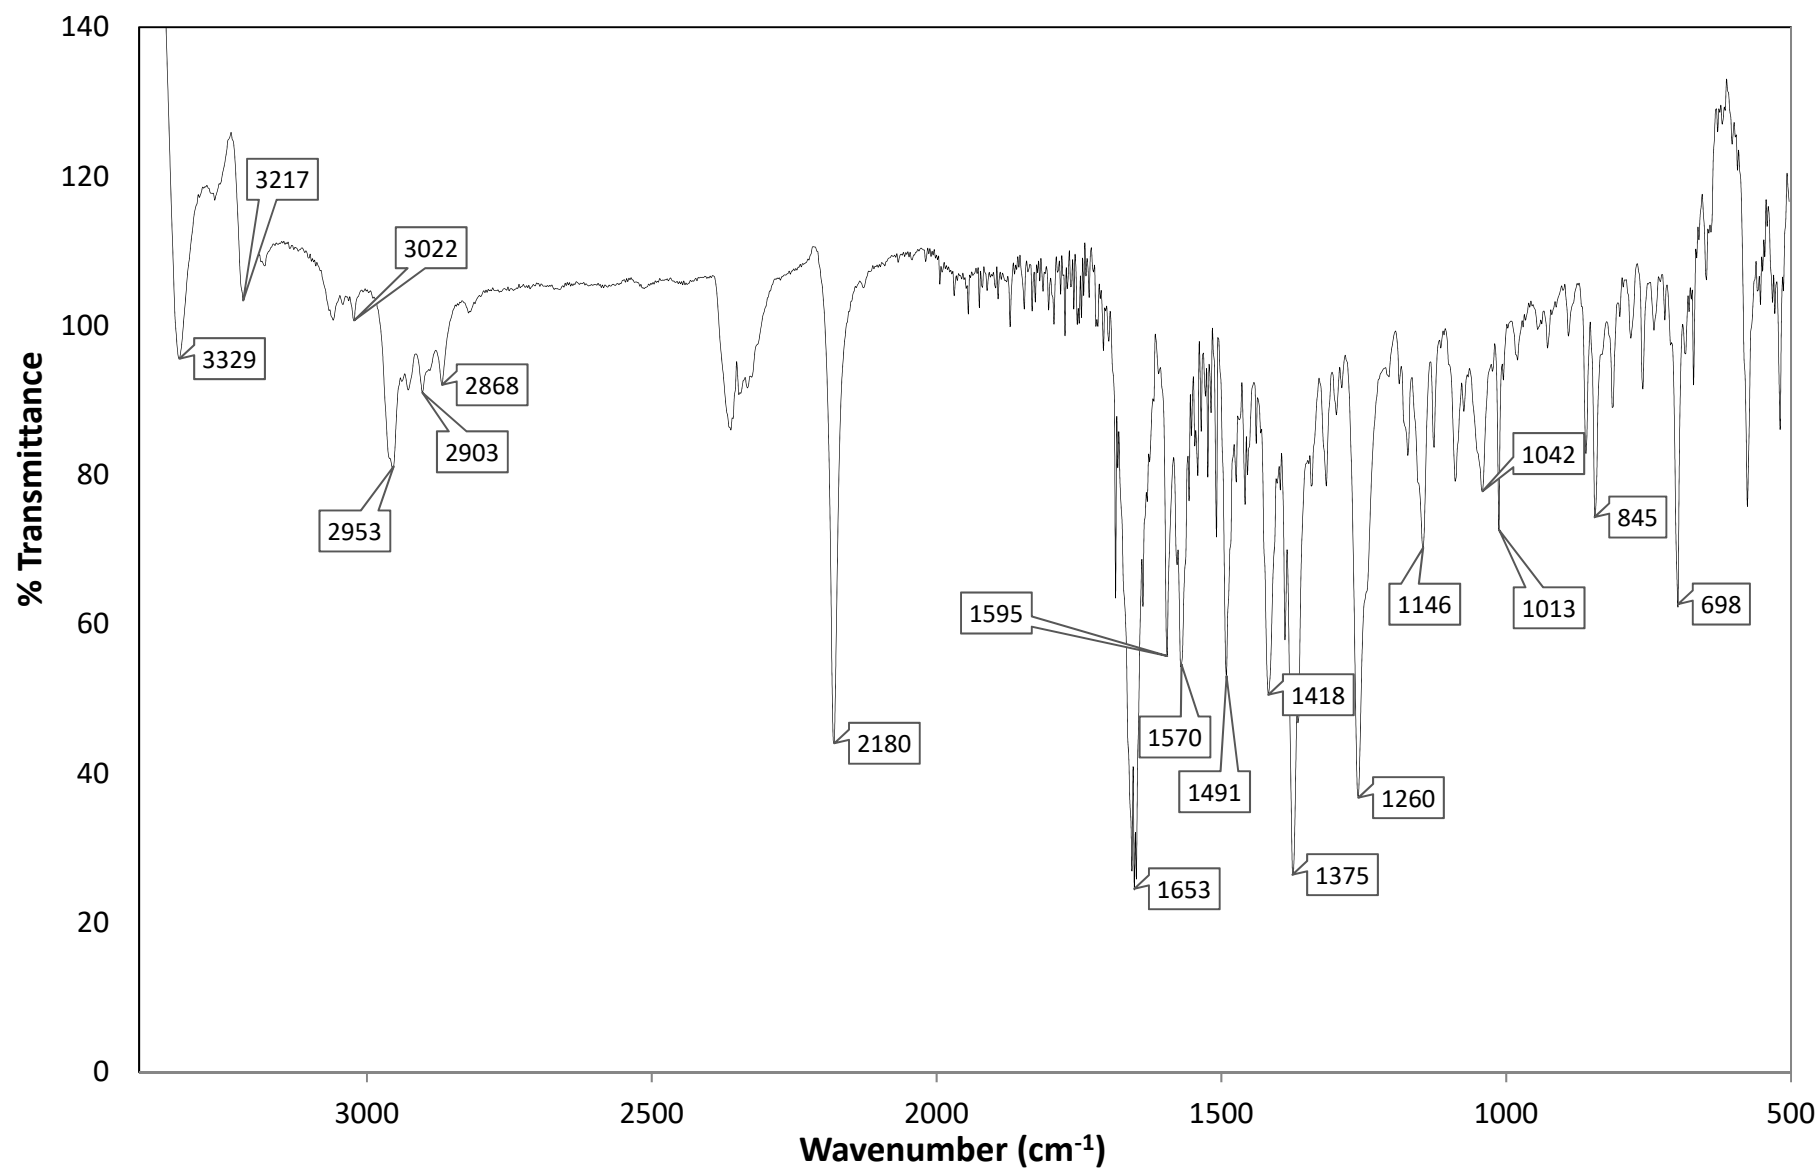

*Figure S10 - IR spectrum of 5c*

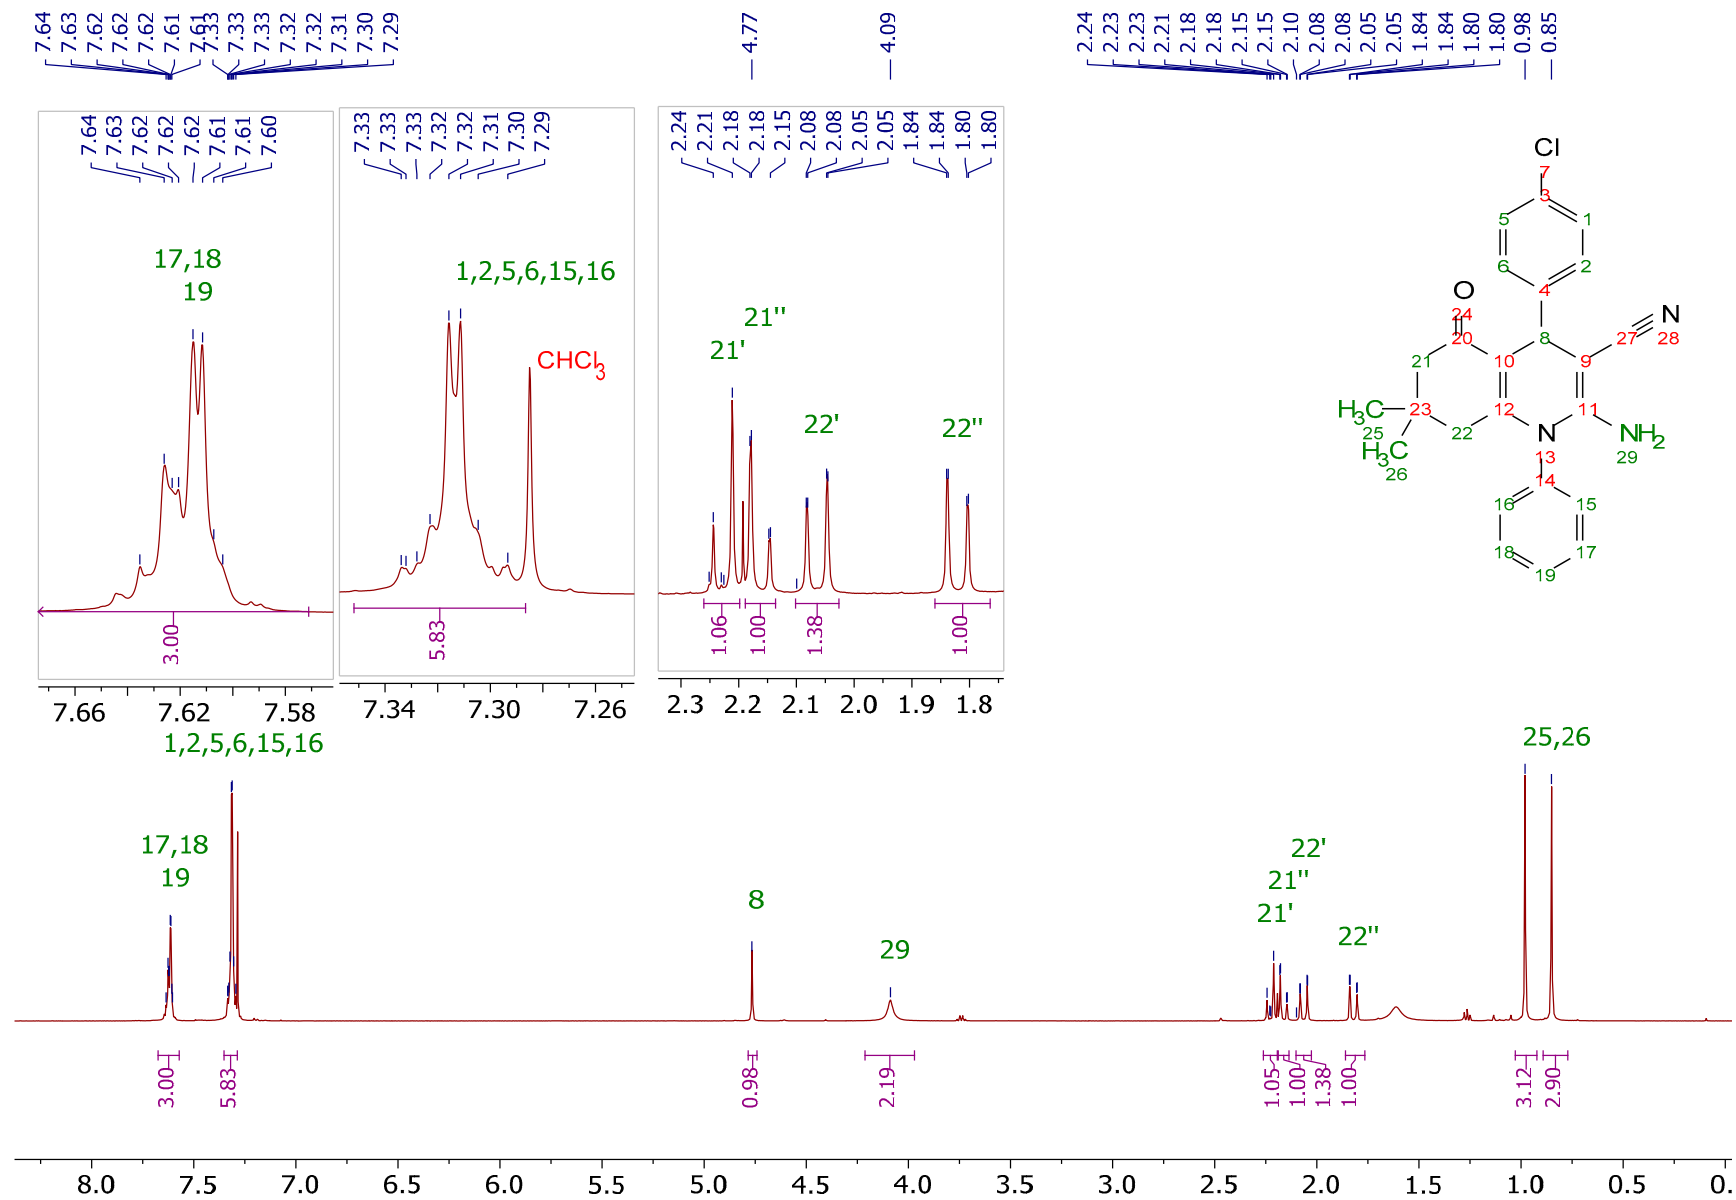

Figure S11 -  $^1\text{H}$  NMR spectrum of 5c



**1.4. Product 5d: 2-amino-4-(2,4-dichlorophenyl)-7,8-dimethyl-5-oxo-1-phenyl-1,4,5,6,7,8-hexahydroquinoline-3-carbonitrile**

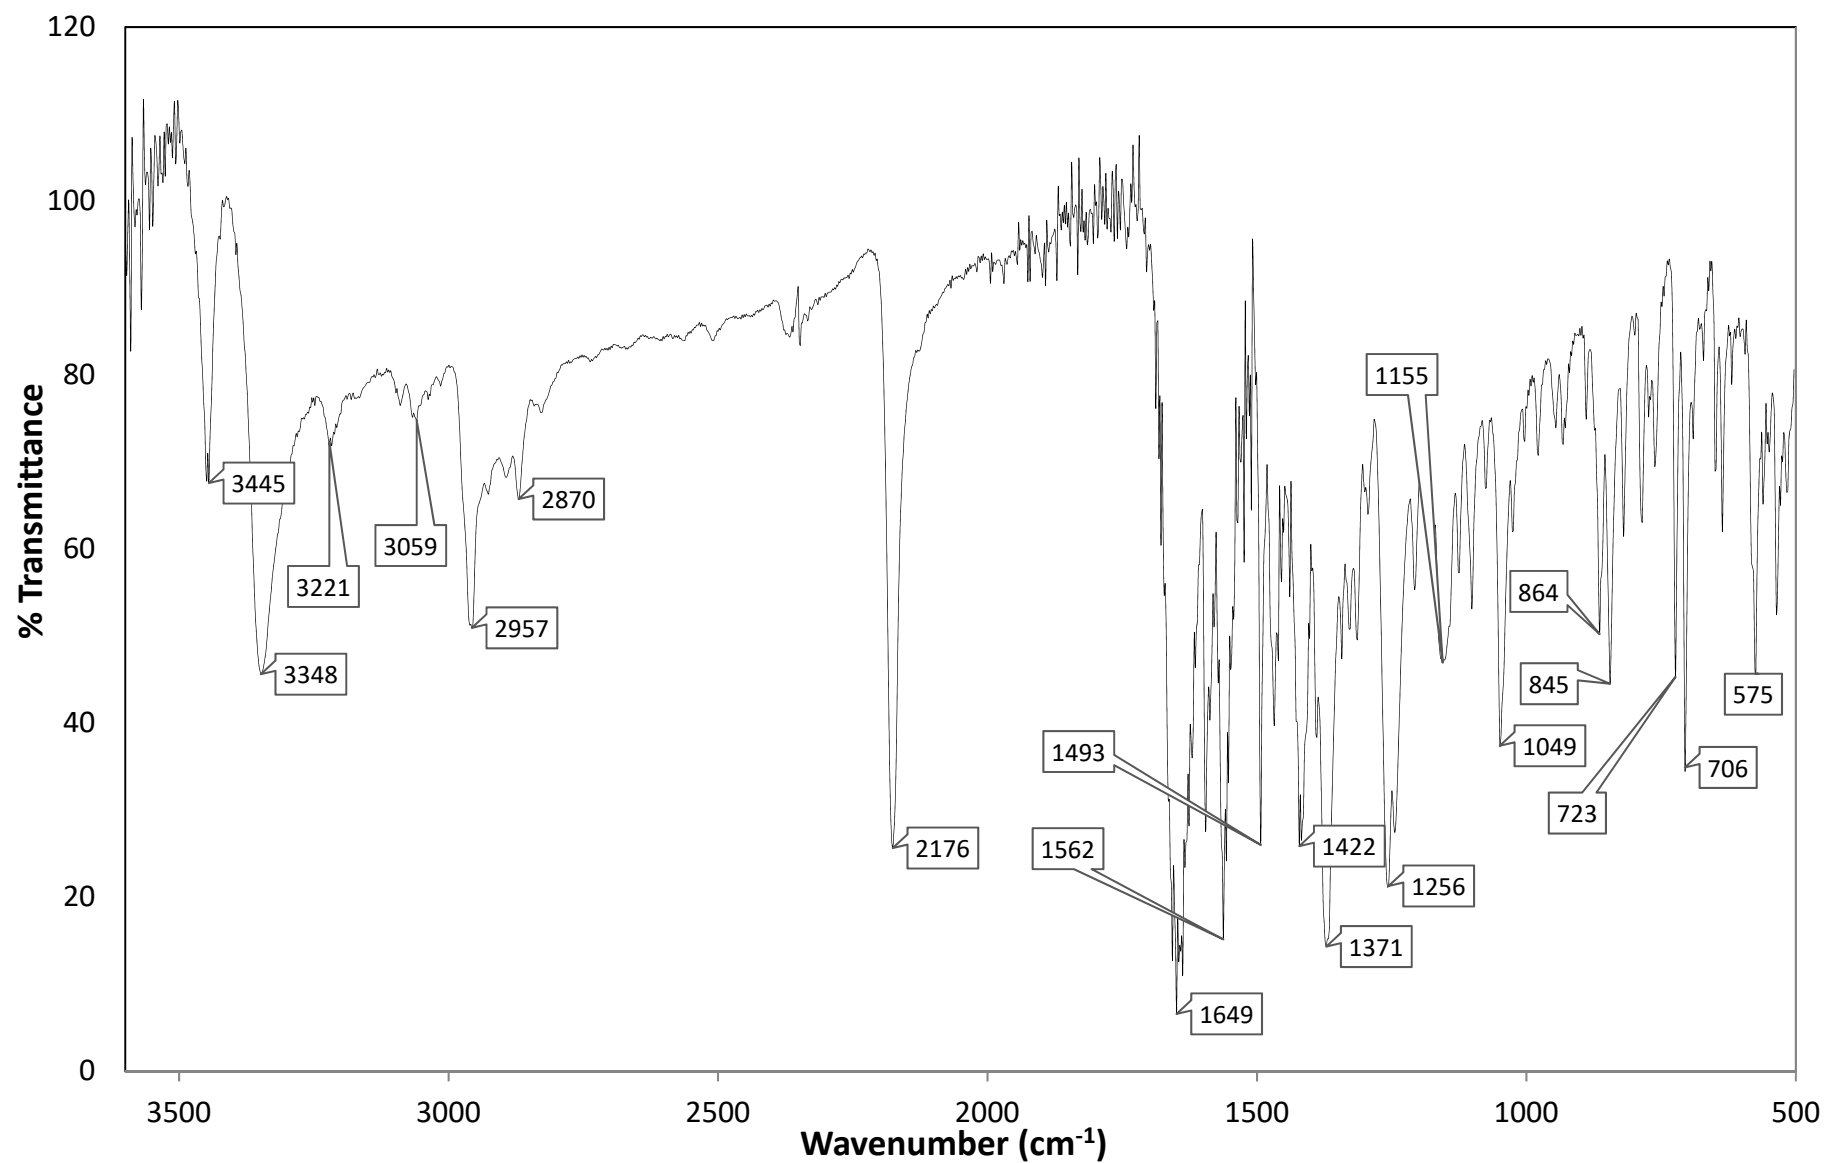

*Figure S12 - IR spectrum of 5d*

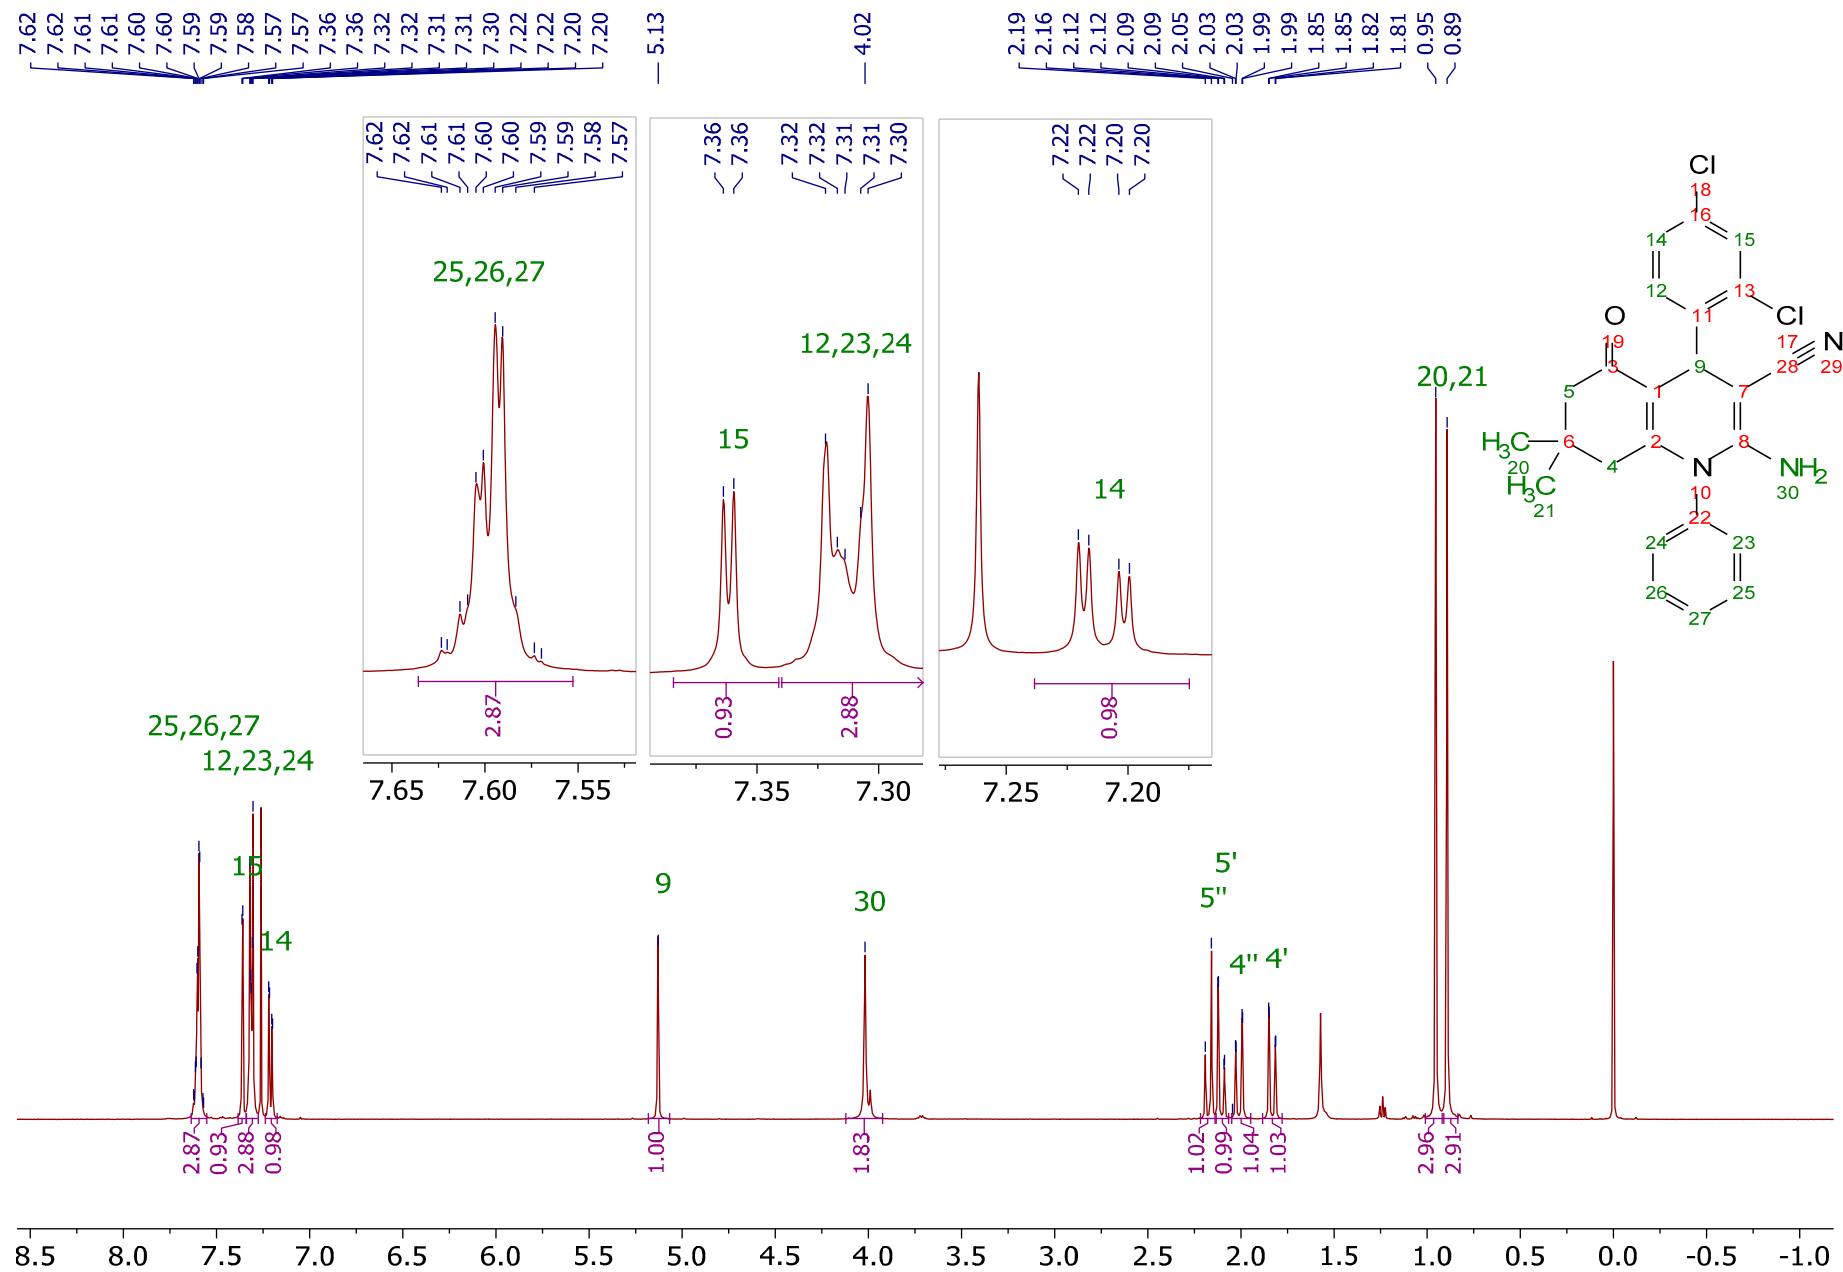

Figure S13 -  $^1\text{H}$  NMR spectrum of **5d**

**1.5. Product 5e: 2-amino-4-(4-fluorophenyl)-7,8-dimethyl-5-oxo-1-phenyl-1,4,5,6,7,8-hexahydroquinoline-3-carbonitrile**

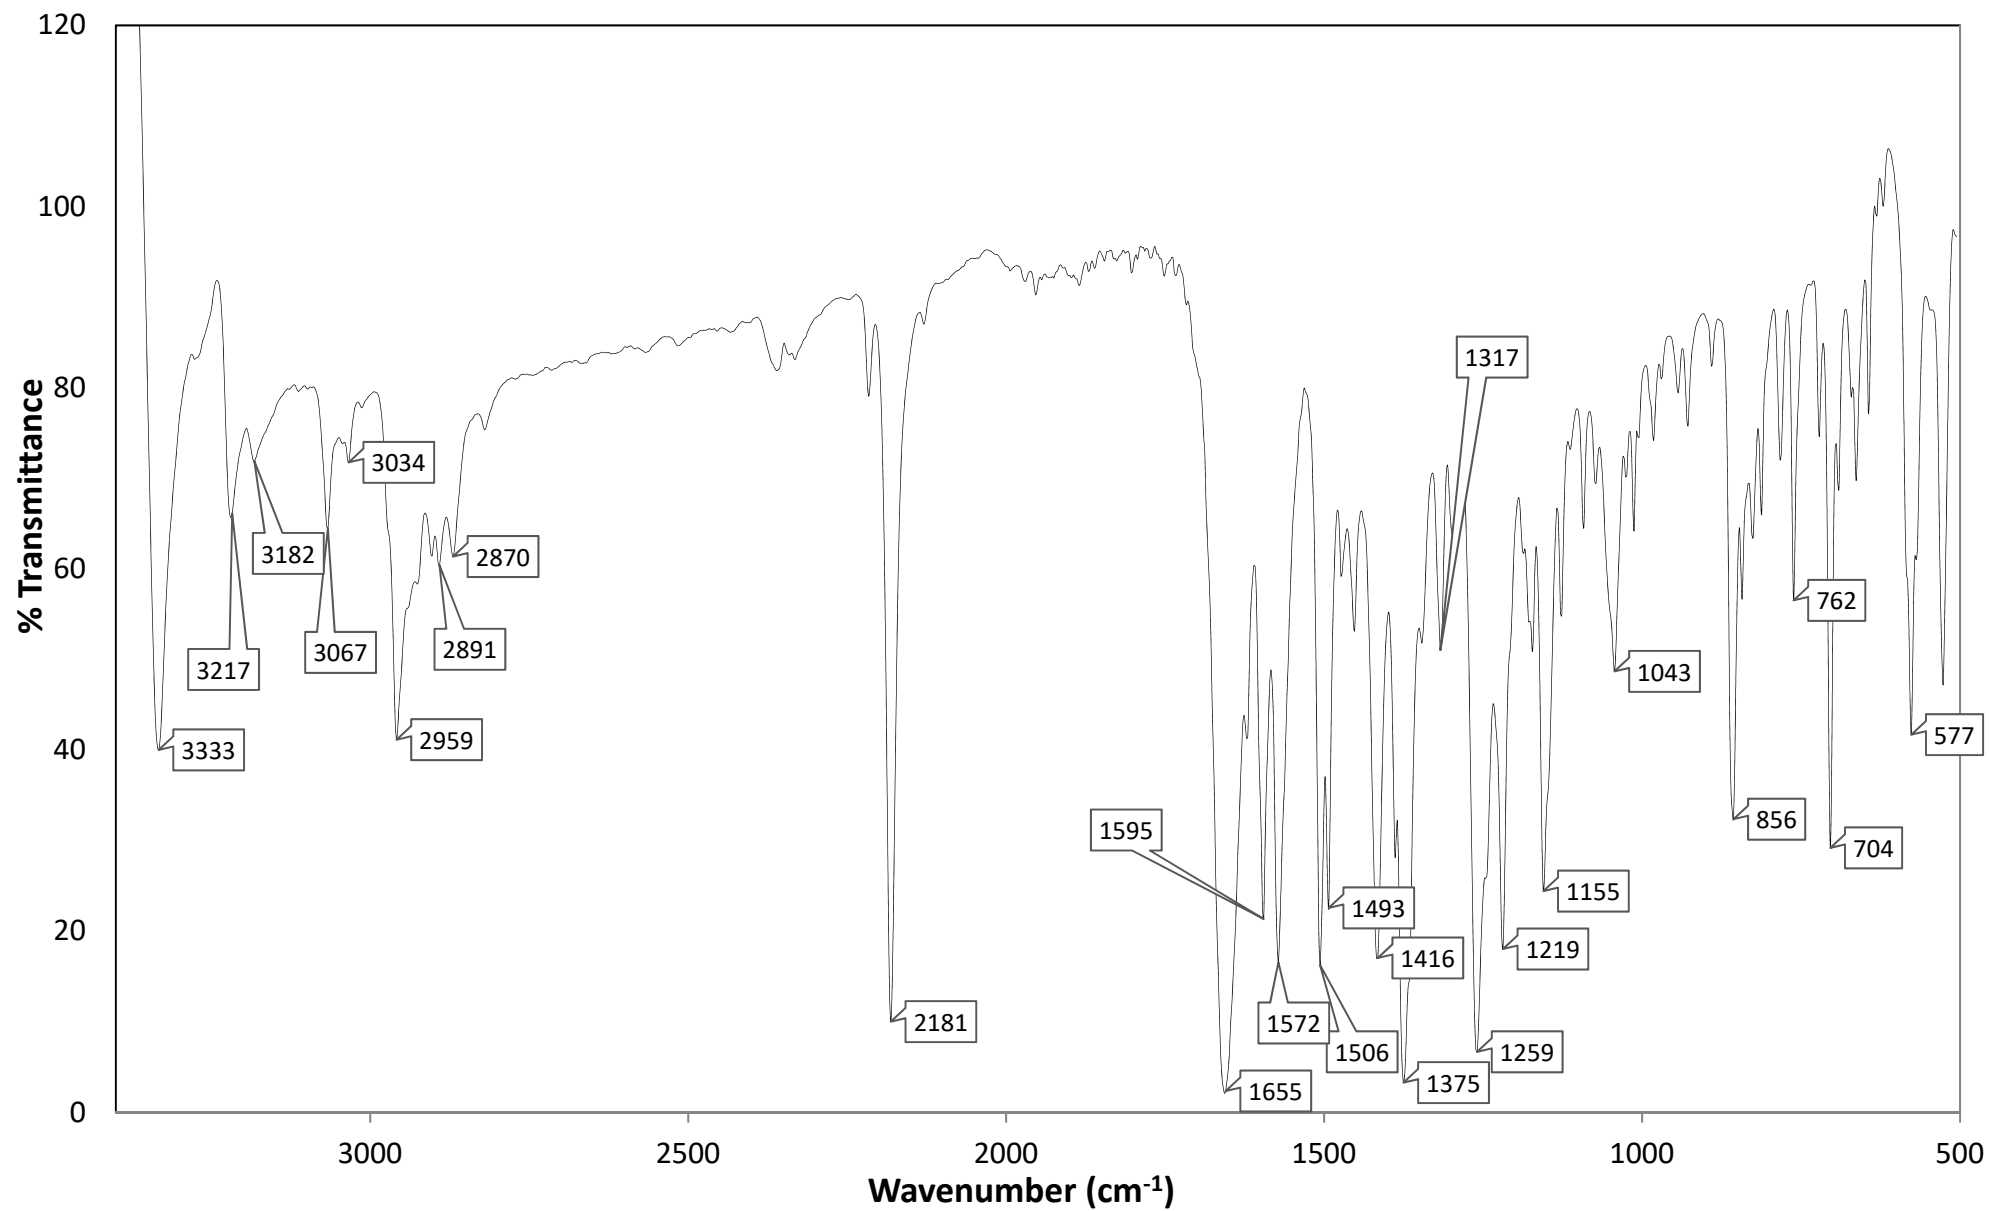

Figure S14 - IR spectrum of 5e

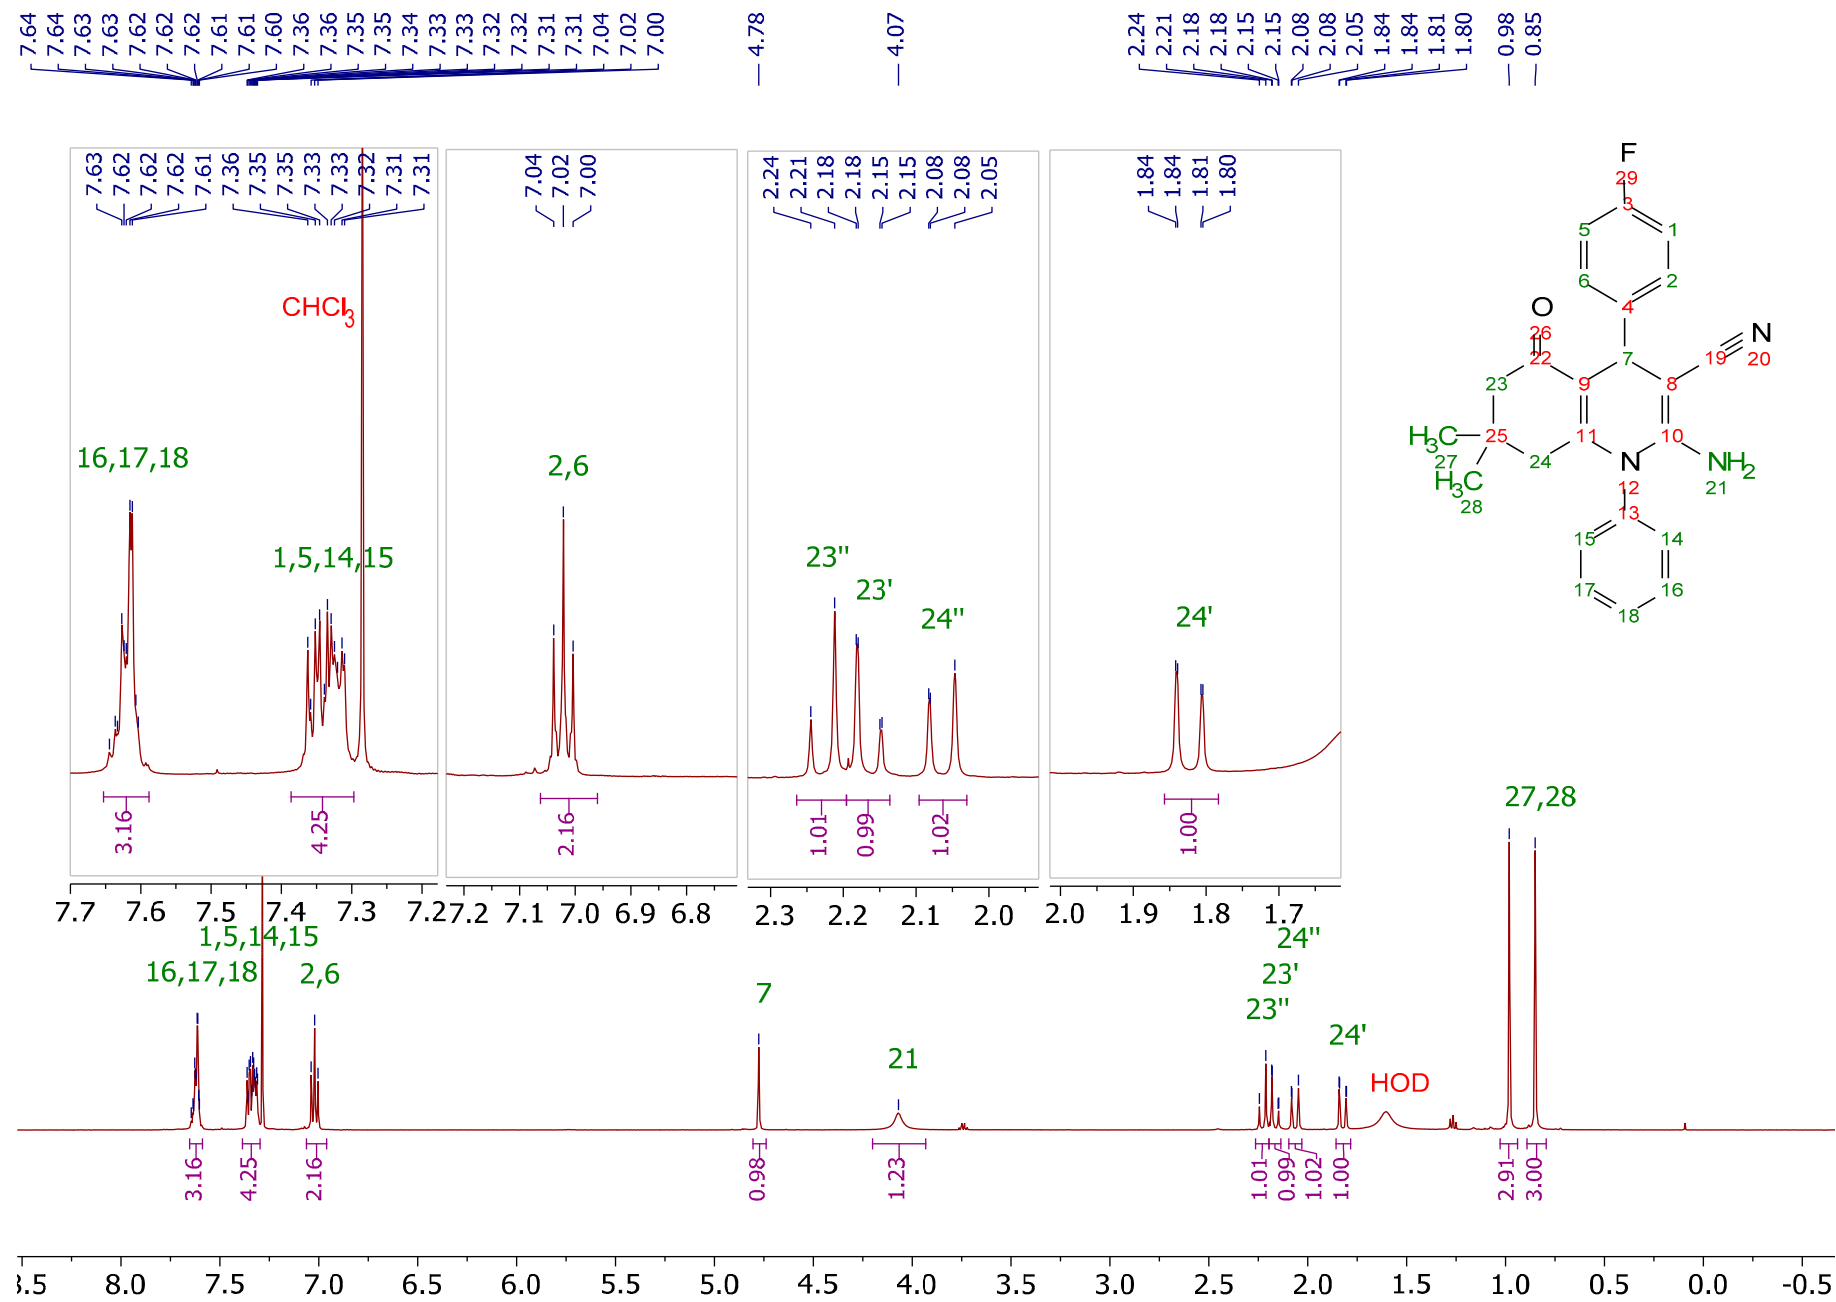

Figure S15 - <sup>1</sup>H NMR spectrum of 5e

**1.6. Product 5f: 2-amino-7,8-dimethyl-5-oxo-1-phenyl-4-thiophen-2-yl-1,4,5,6,7,8-hexahydroquinoline-3-carbonitrile**

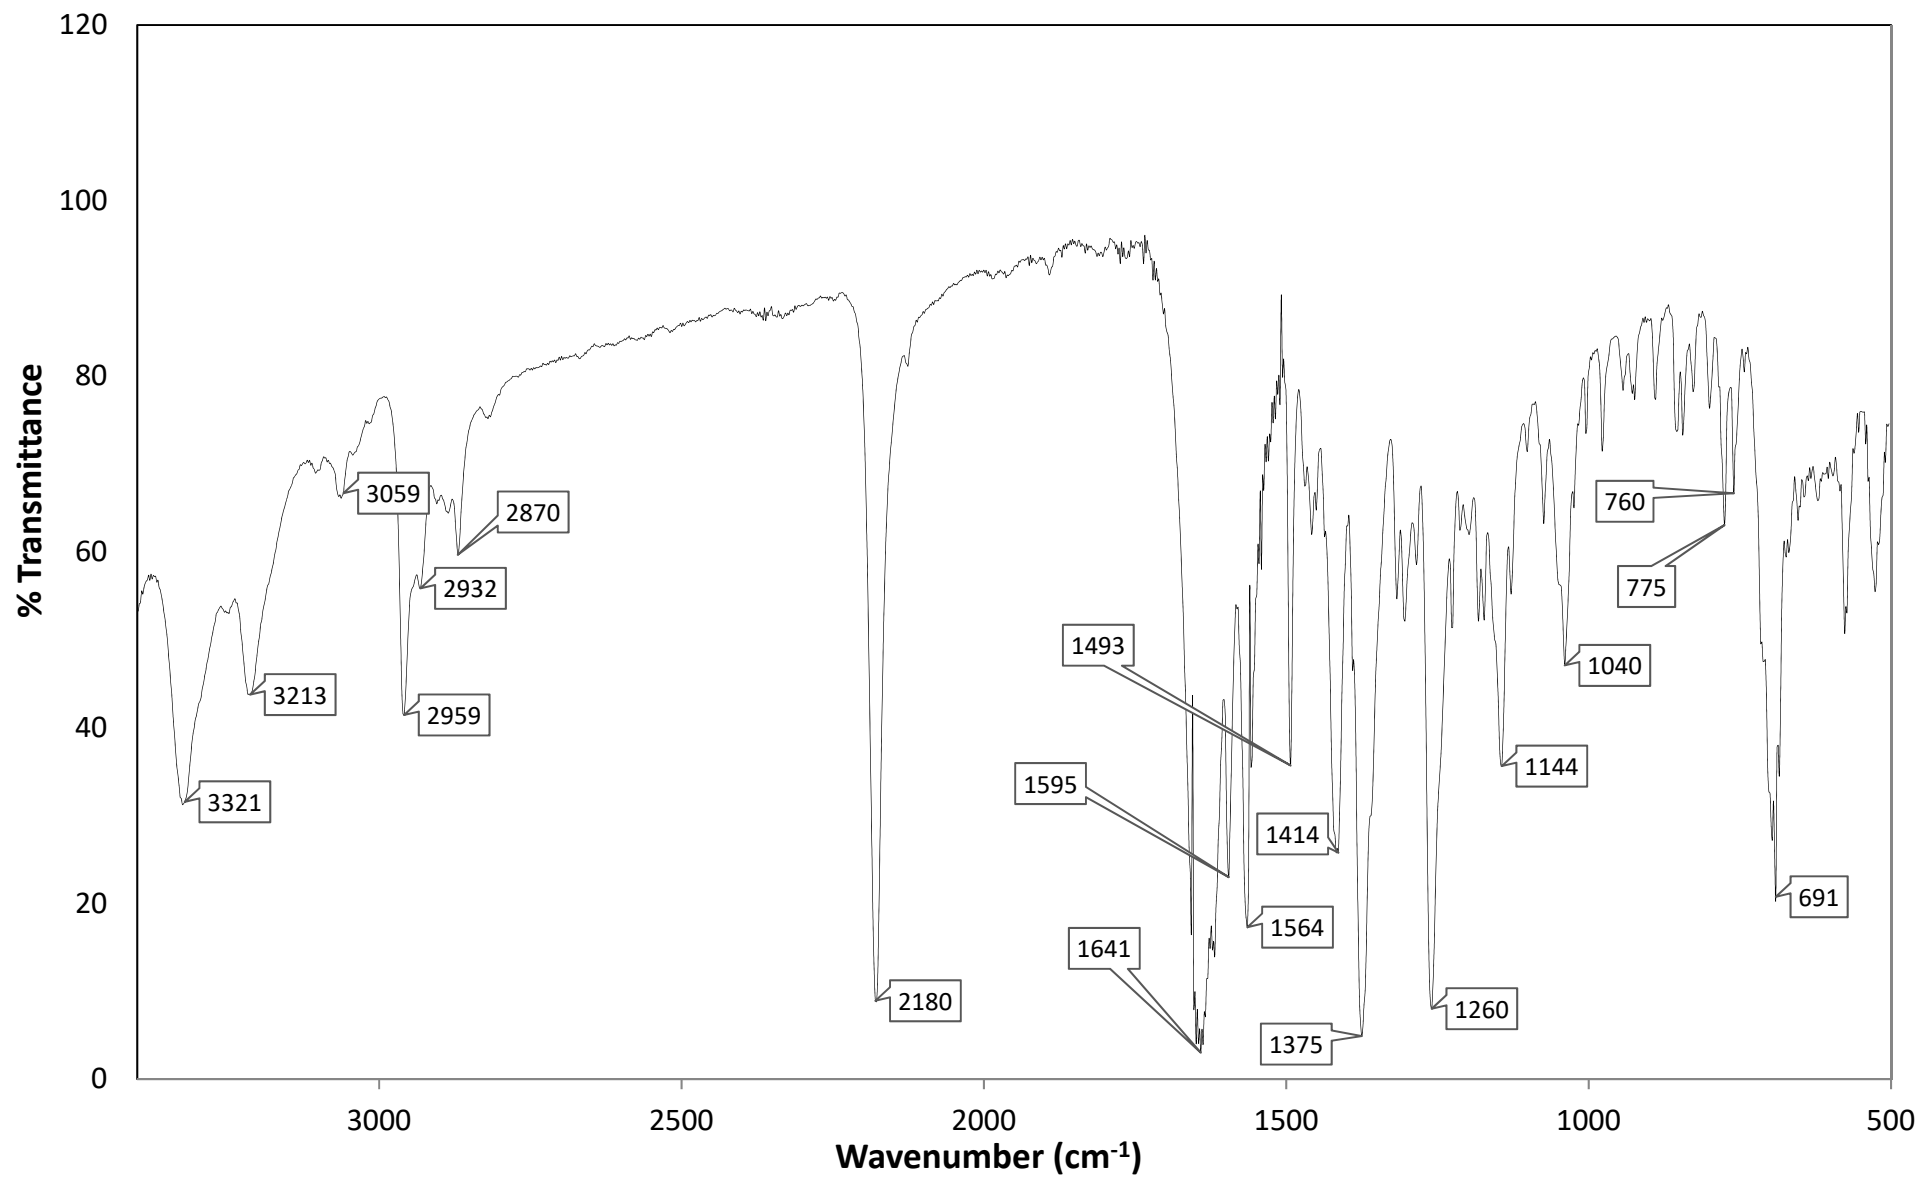

*Figure S16 - IR spectrum of 5f*

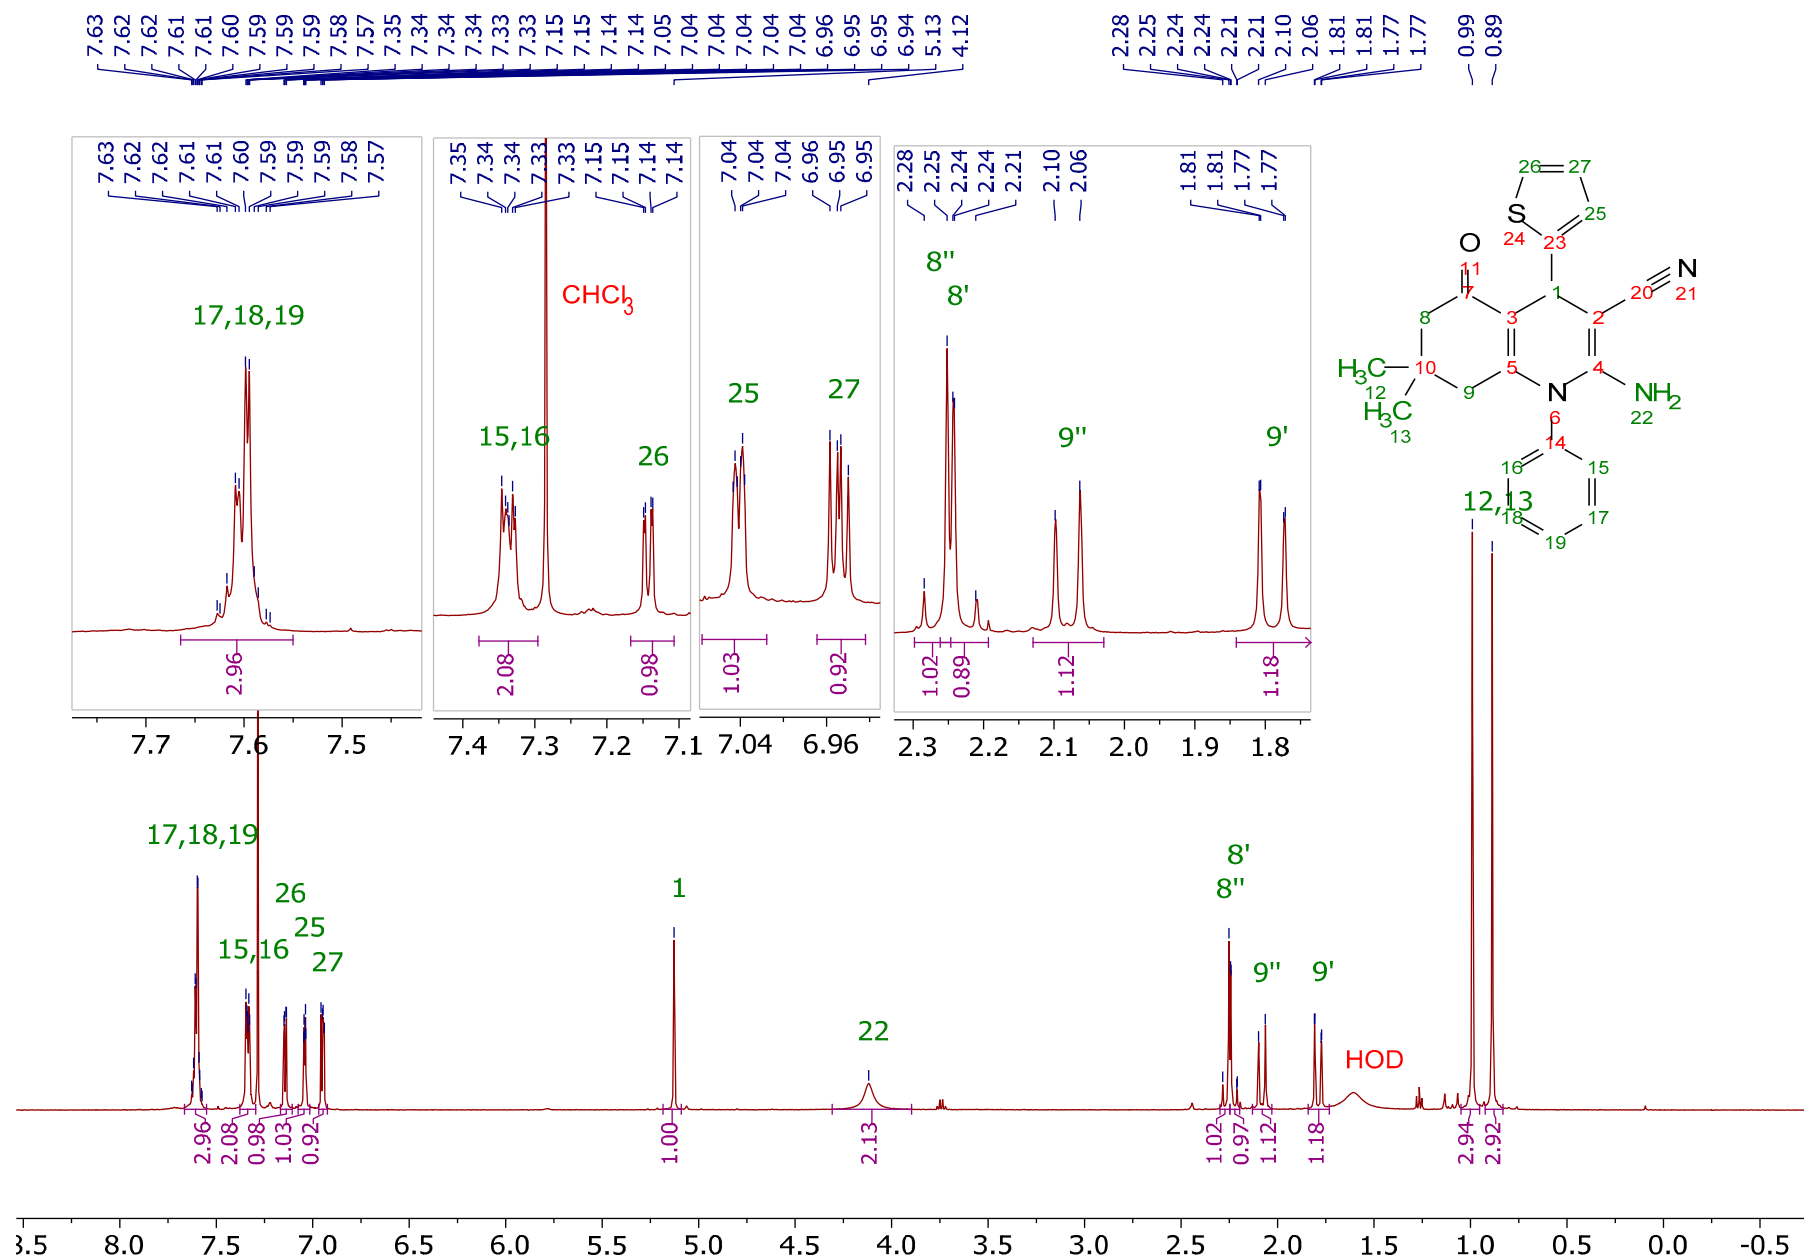

Figure S17 - <sup>1</sup>H NMR spectrum of 5f

**1.7. Product 5g: 2-amino-7,8-dimethyl-5-oxo-1-phenyl-4-(3-nitrophenyl)-1,4,5,6,7,8-hexahydroquinoline-3-carbonitrile**

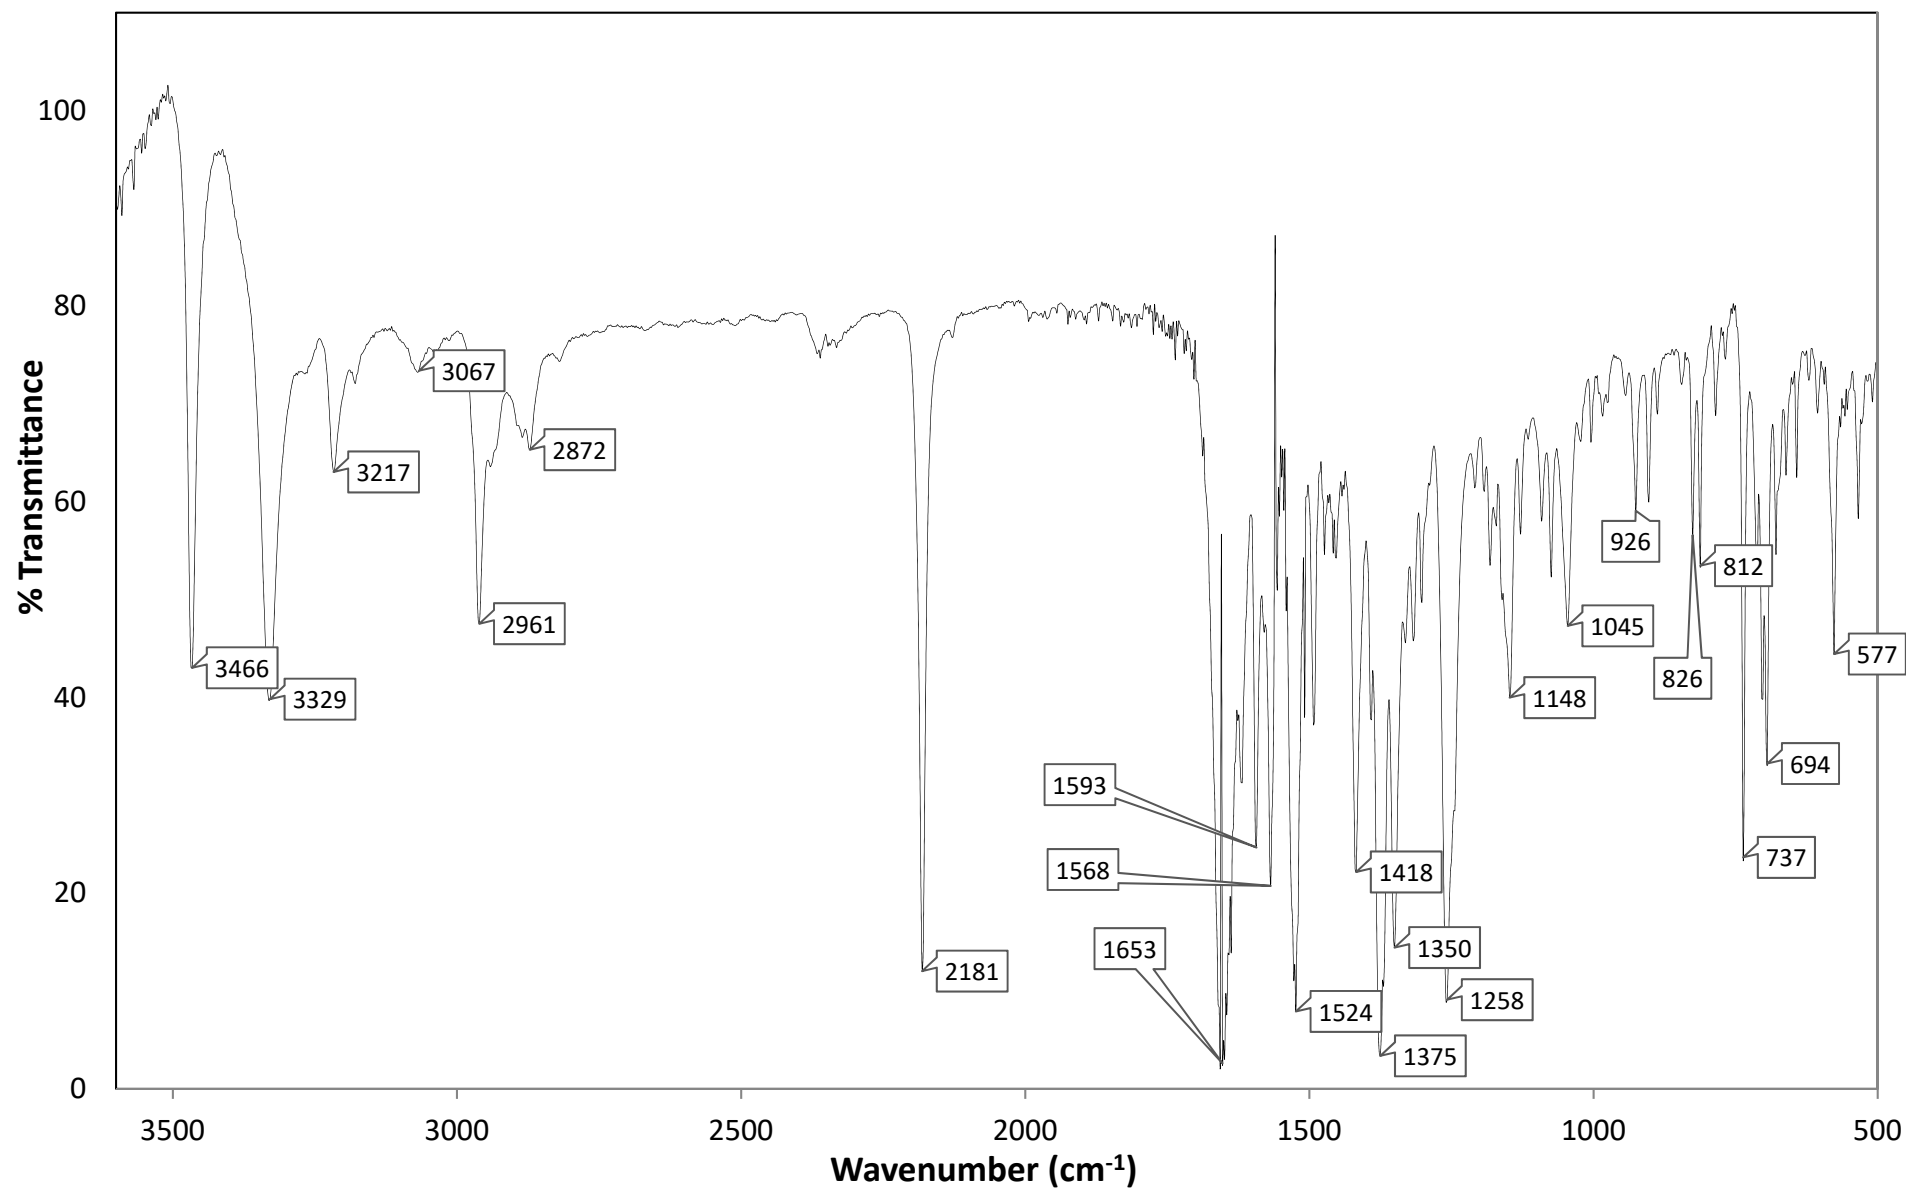

*Figure S18 - IR spectrum of 5g*

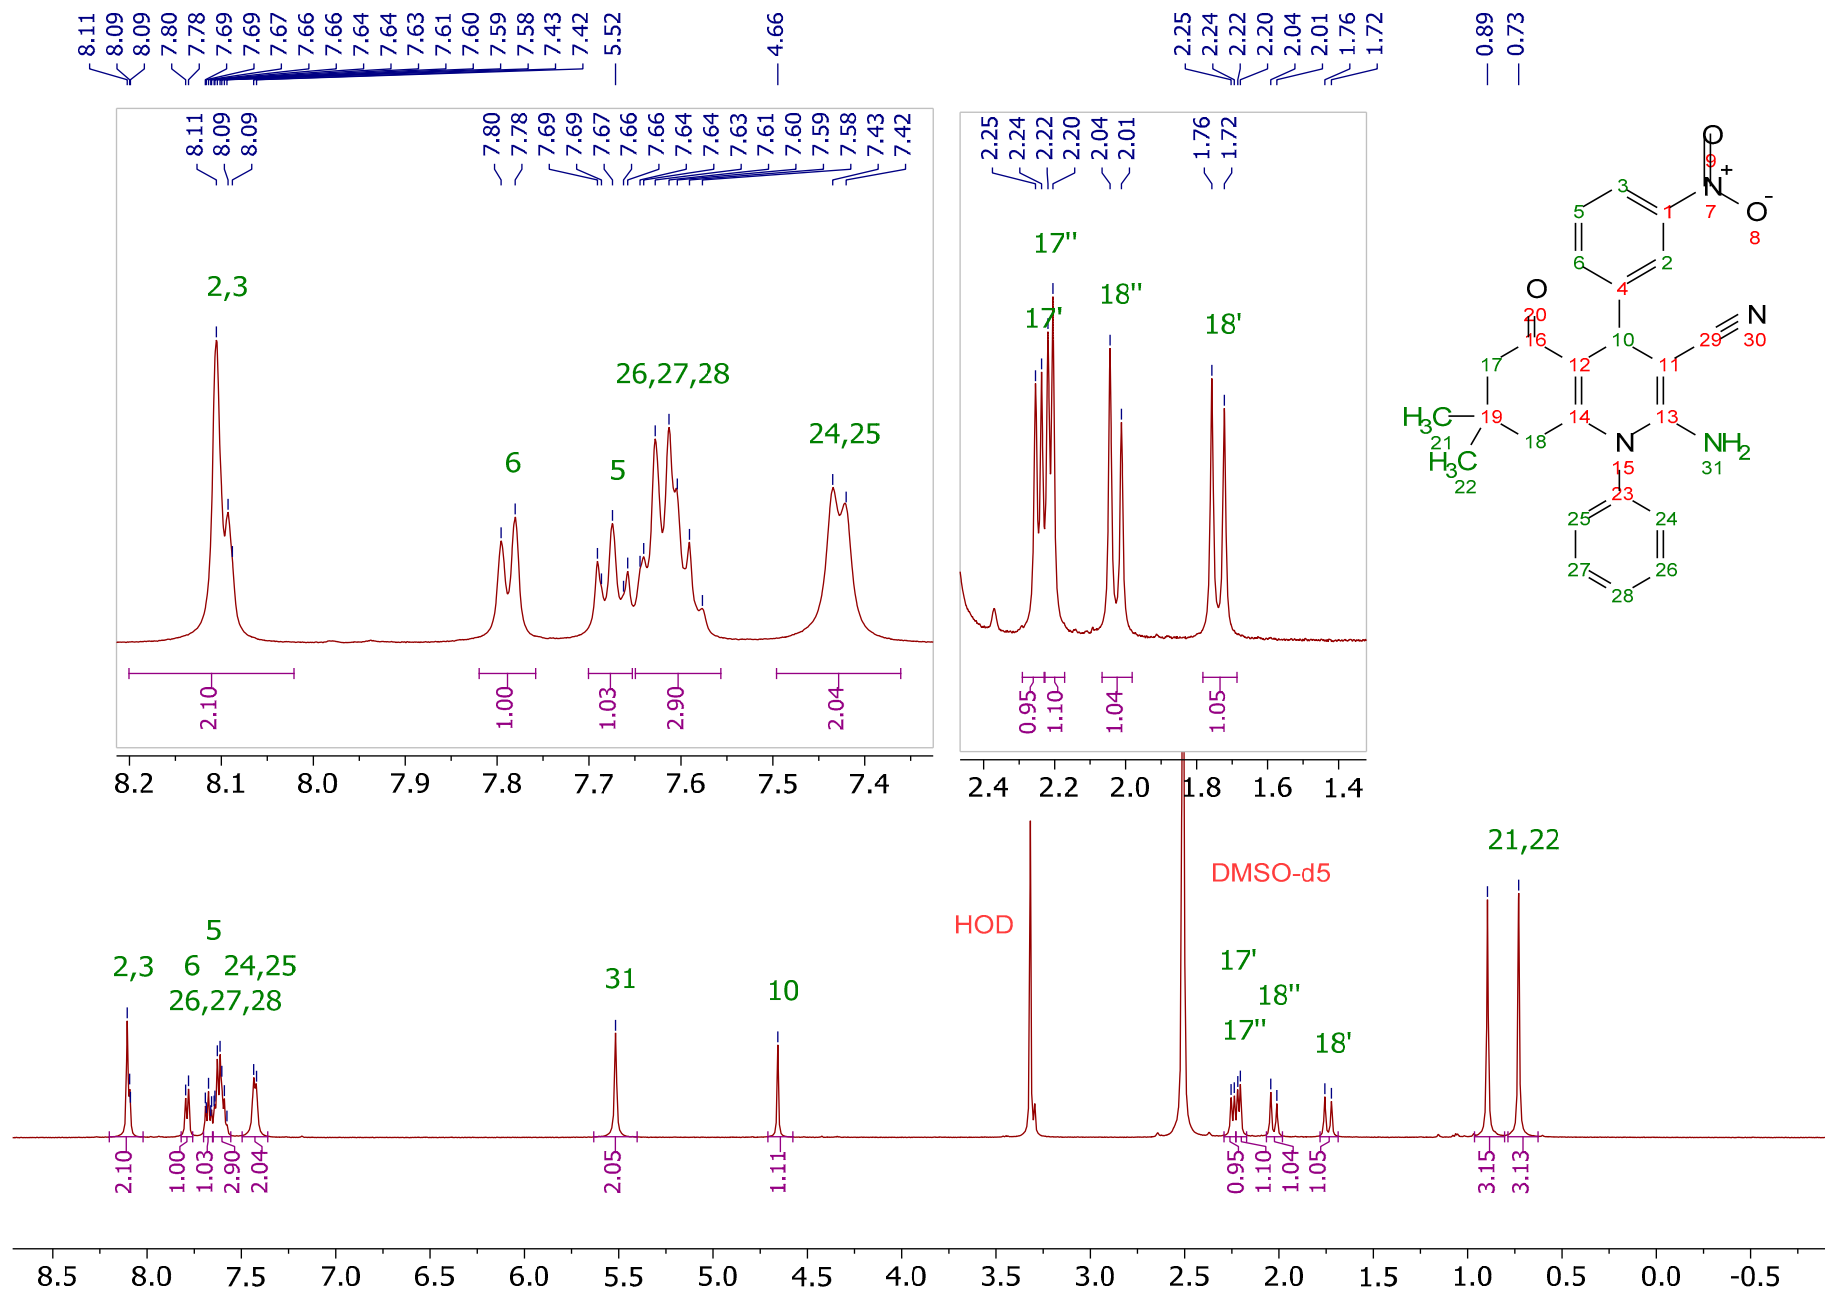

Figure S19 - <sup>1</sup>H NMR spectrum of 5g



**1.8. Product 5h: 2-amino-4-(4-methoxyphenyl)-7,8-dimethyl-5-oxo-1-phenyl-1,4,5,6,7,8-hexahydroquinoline-3-carbonitrile**

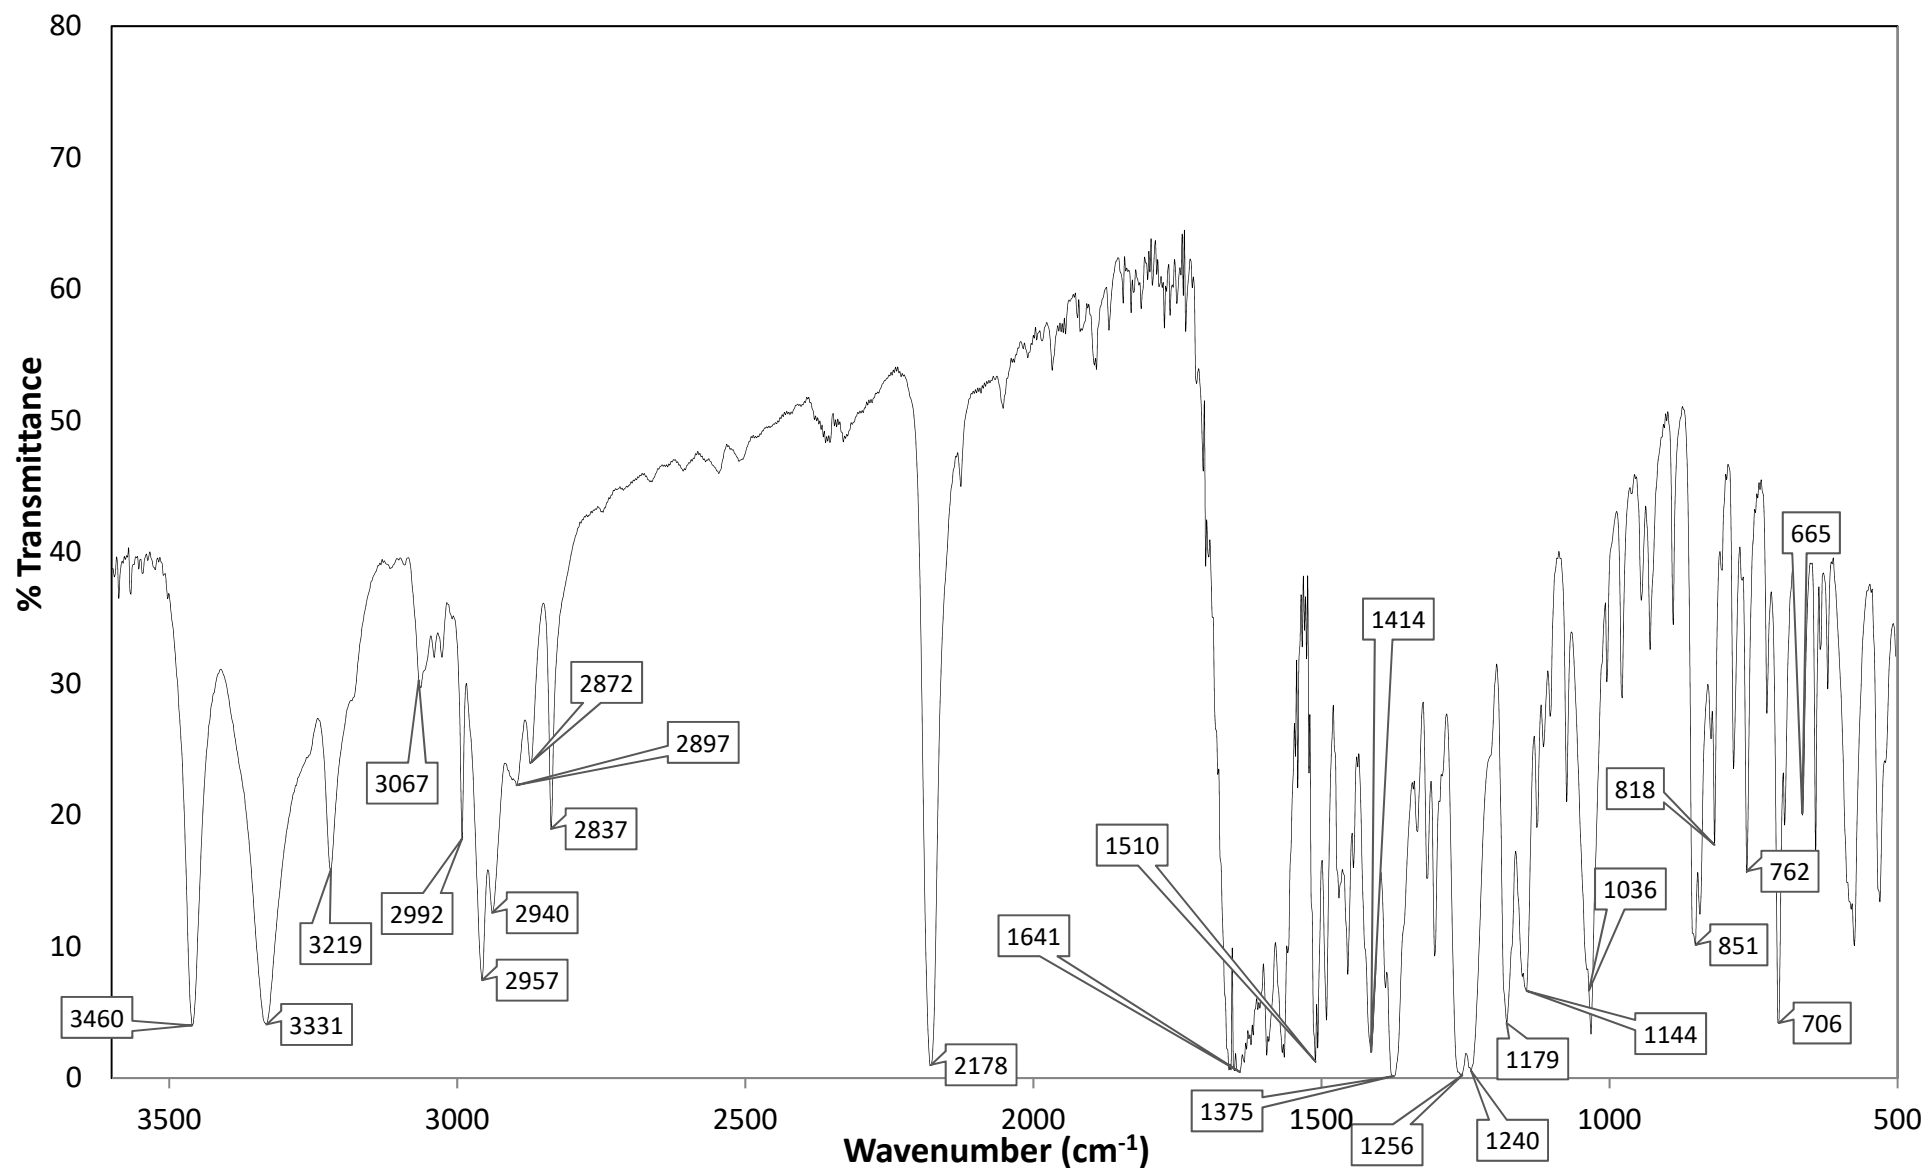

*Figure S20 - IR spectrum of 5h*

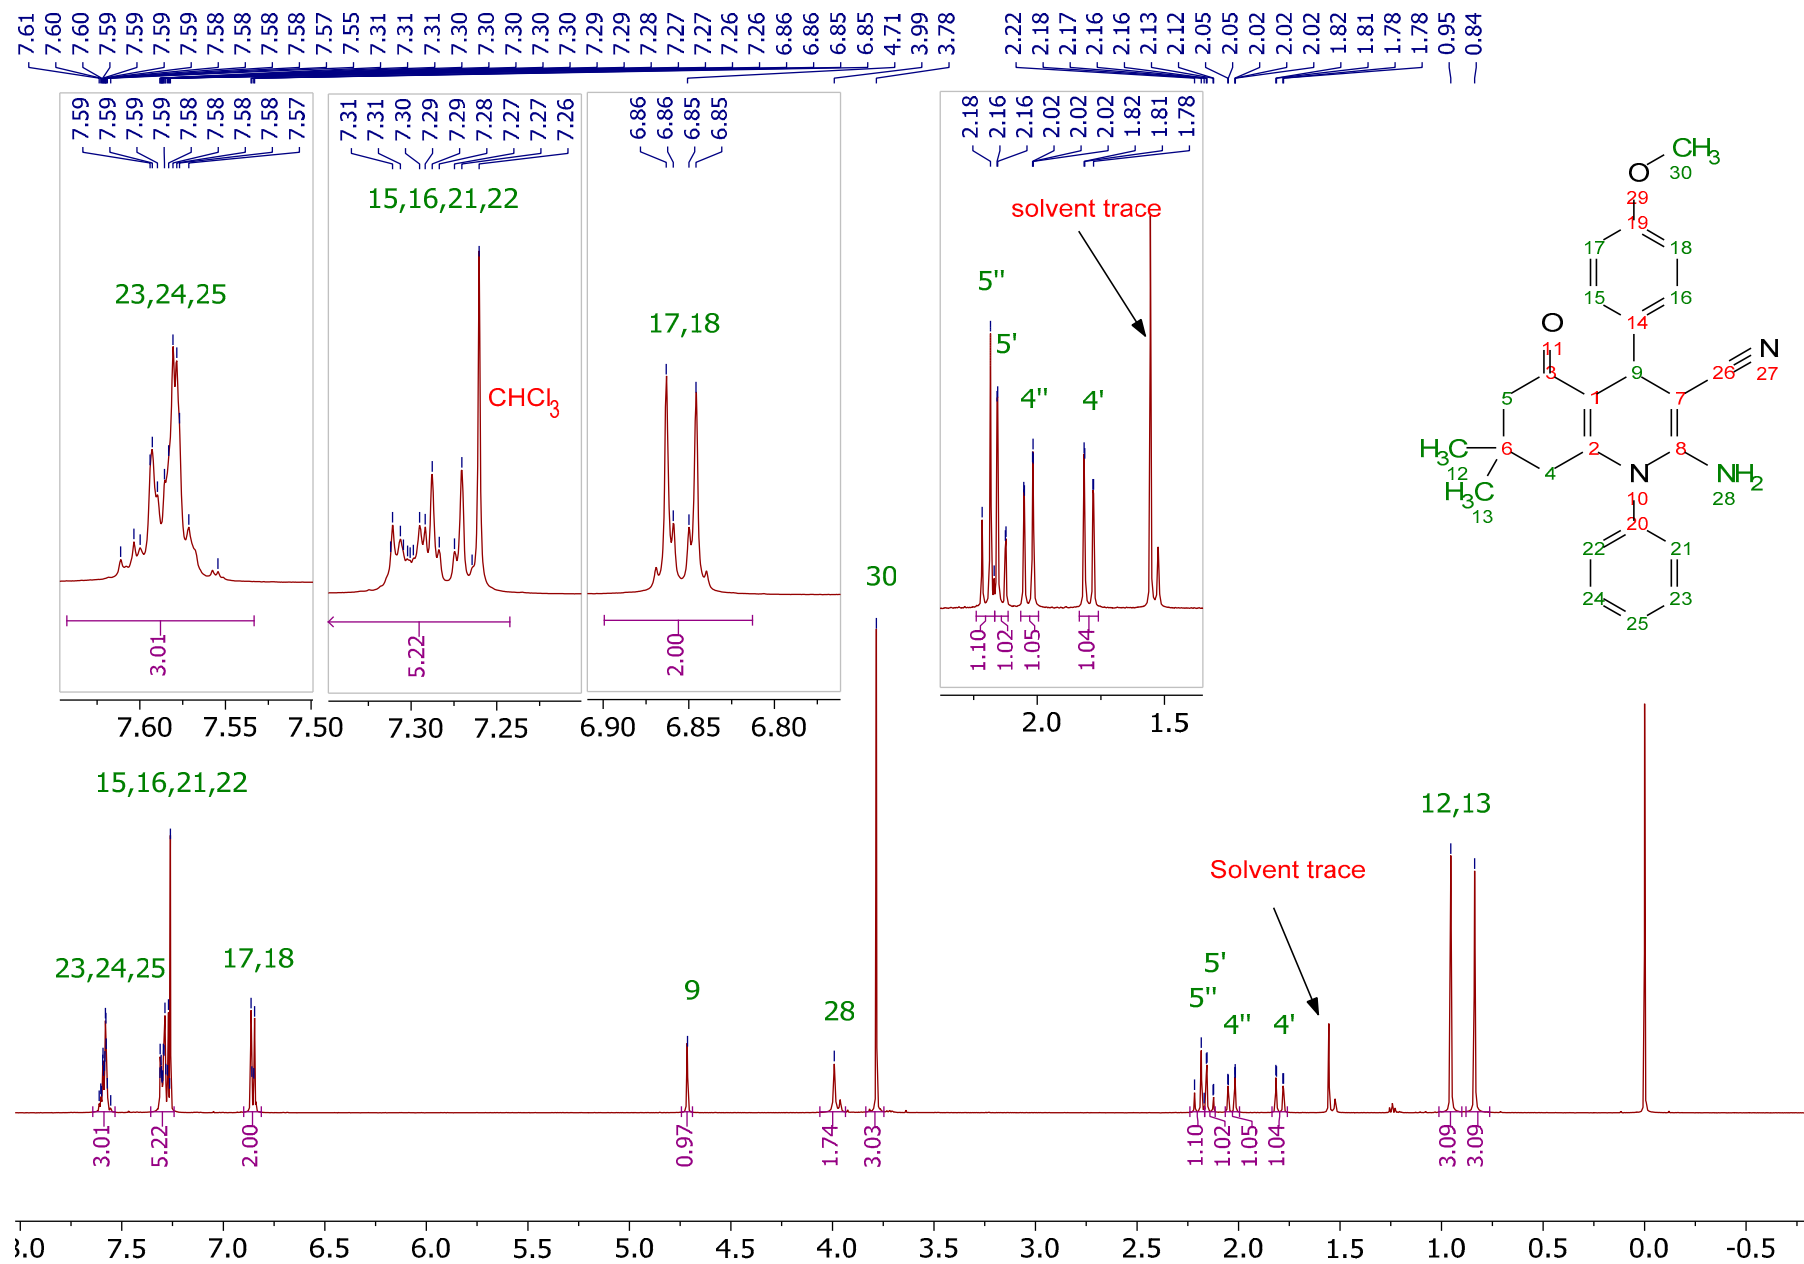

Figure S21 -  $^1\text{H}$  NMR spectrum of 5h

**1.9. Product 5i: Methyl 2-amino-4-(2,4-dichlorophenyl)-7,8-dimethyl-5-oxo-1-phenyl-1,4,5,6,7,8-hexahydroquinoline-3-carboxylate**

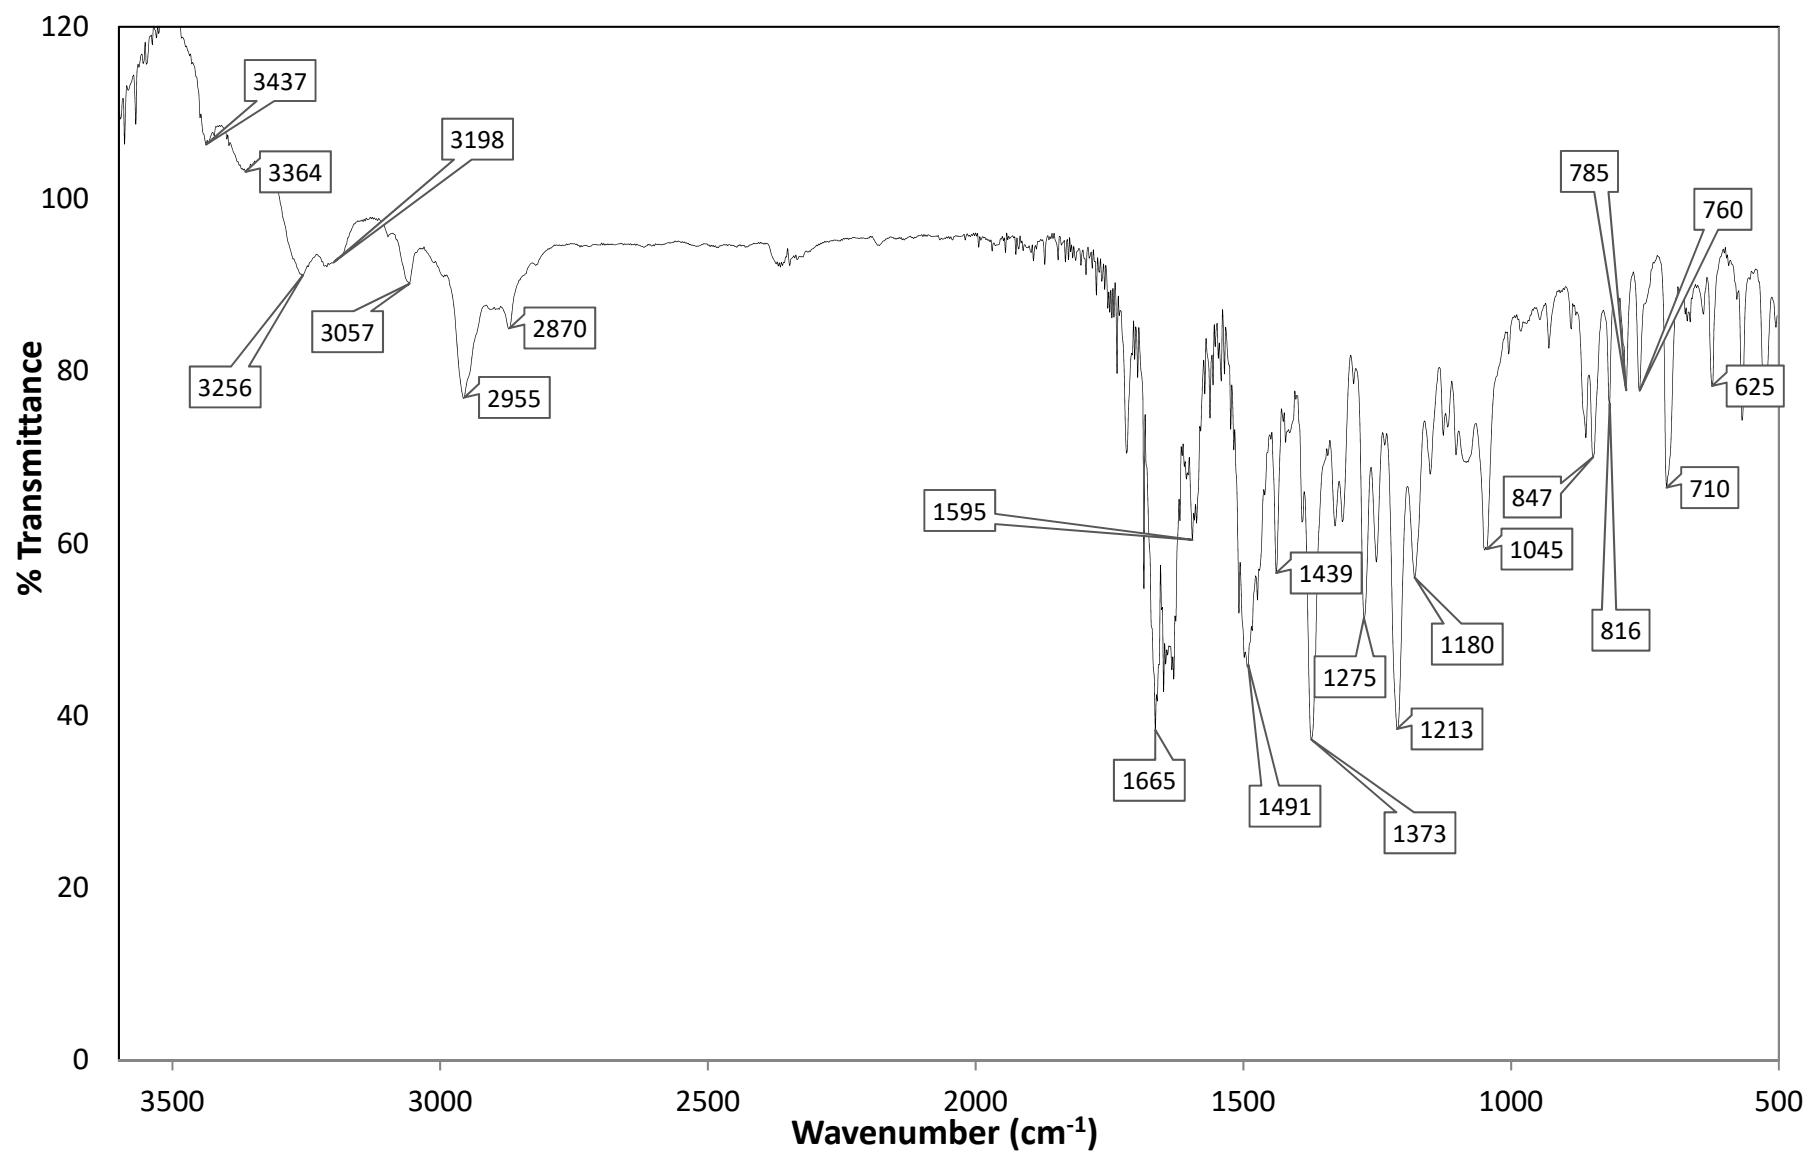

*Figure S22 - IR spectrum of 5i*



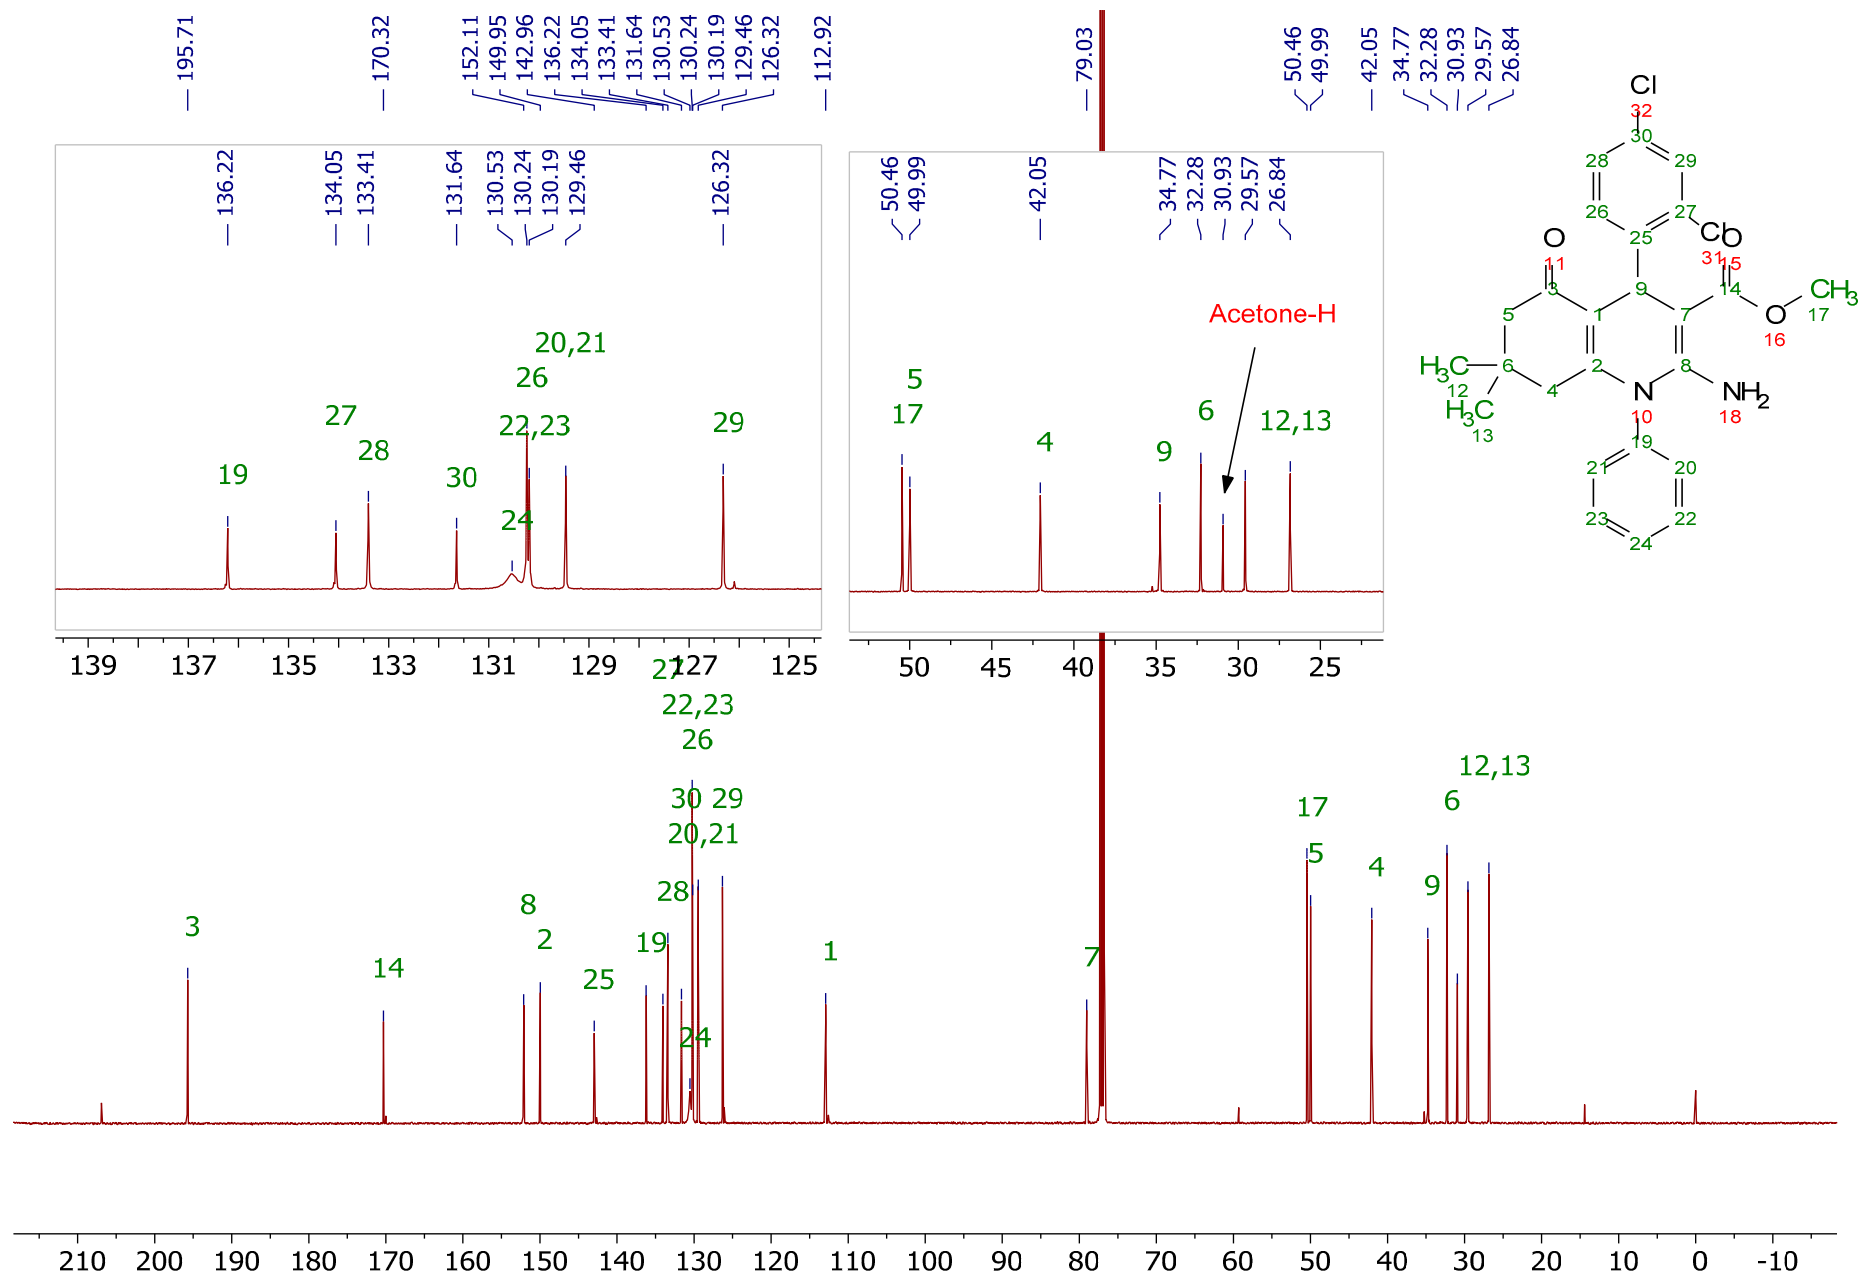

Figure S24 –  $^{13}\text{C}$  NMR spectrum of **5i**

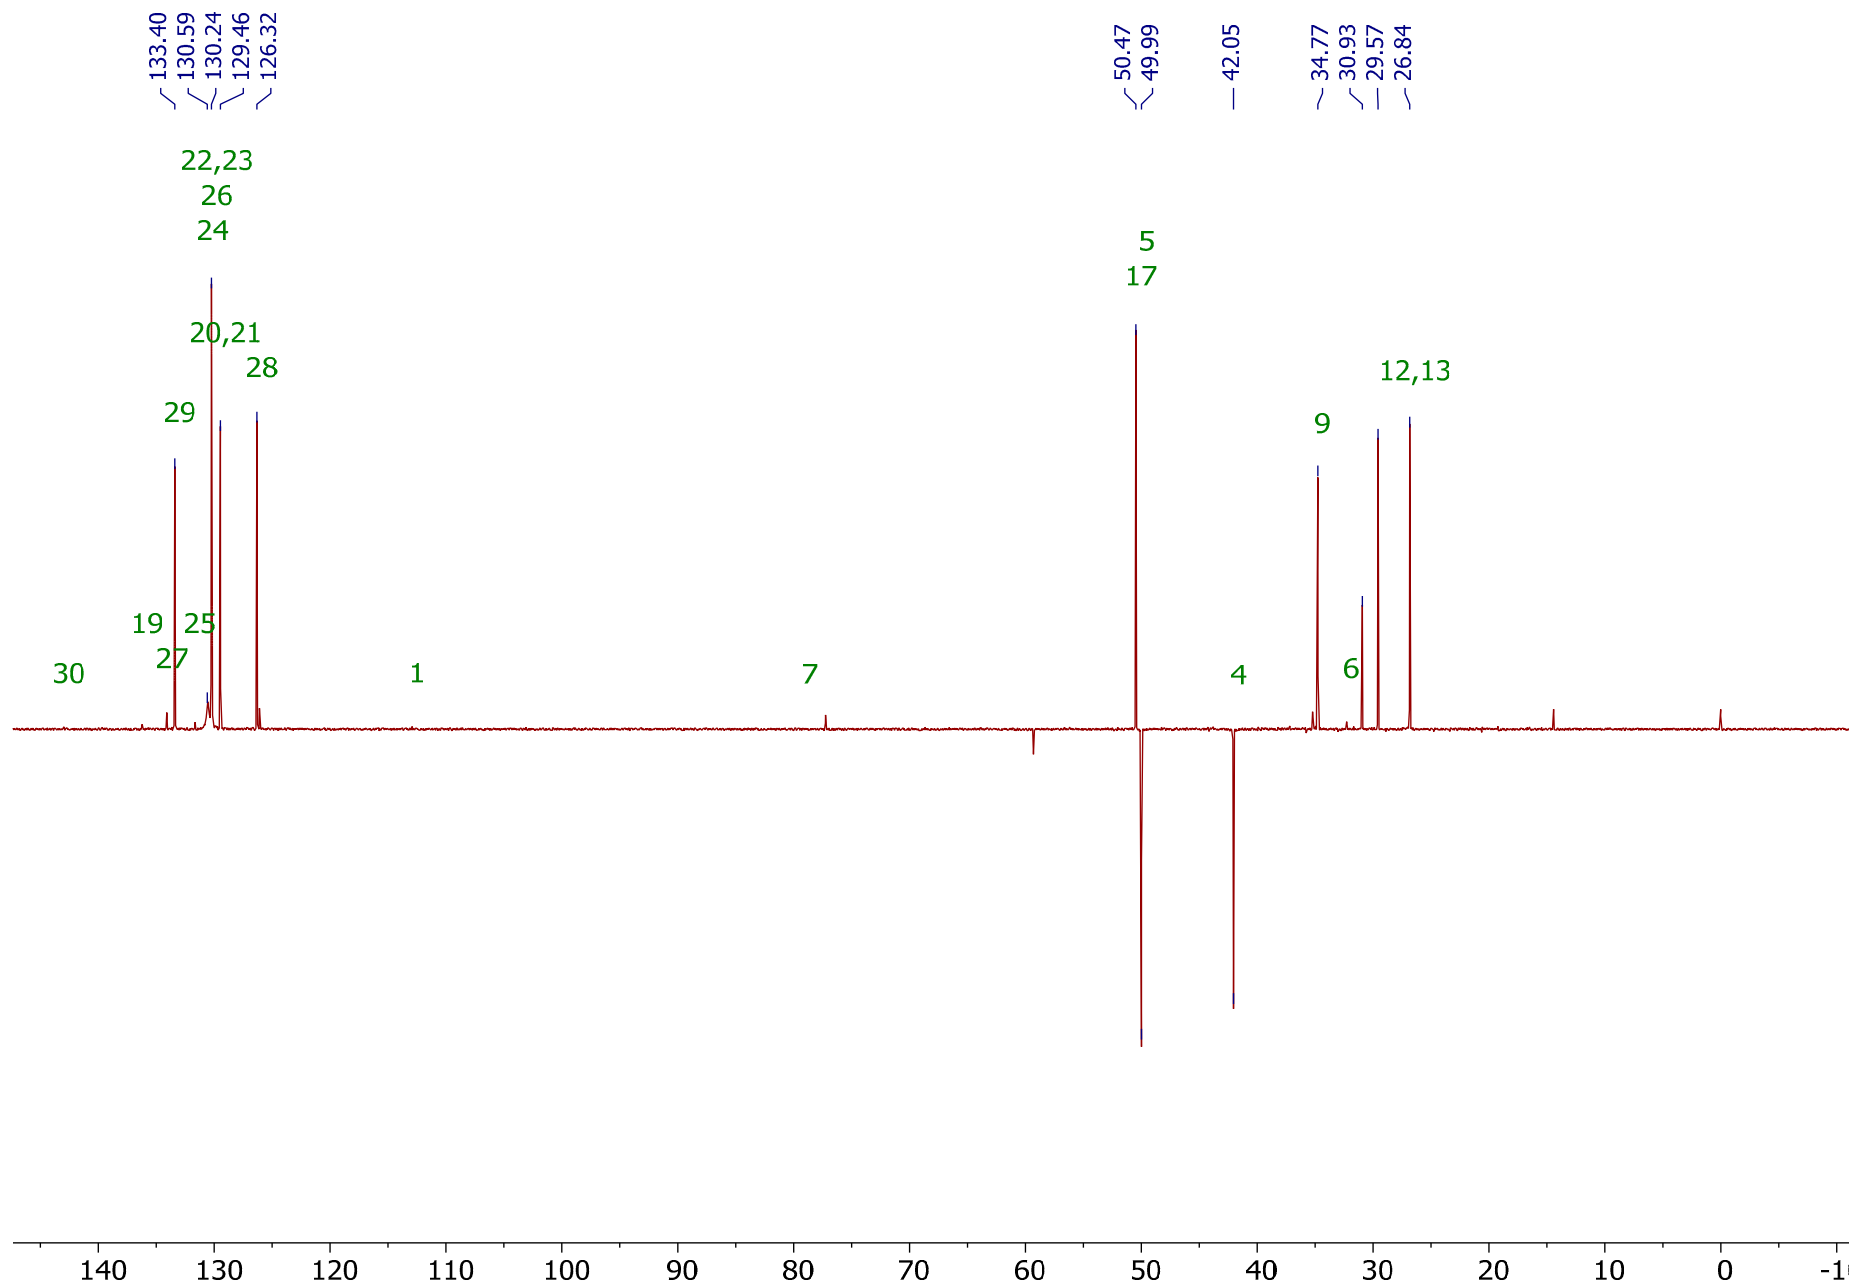

Figure S25 - DEPT spectrum of 5i

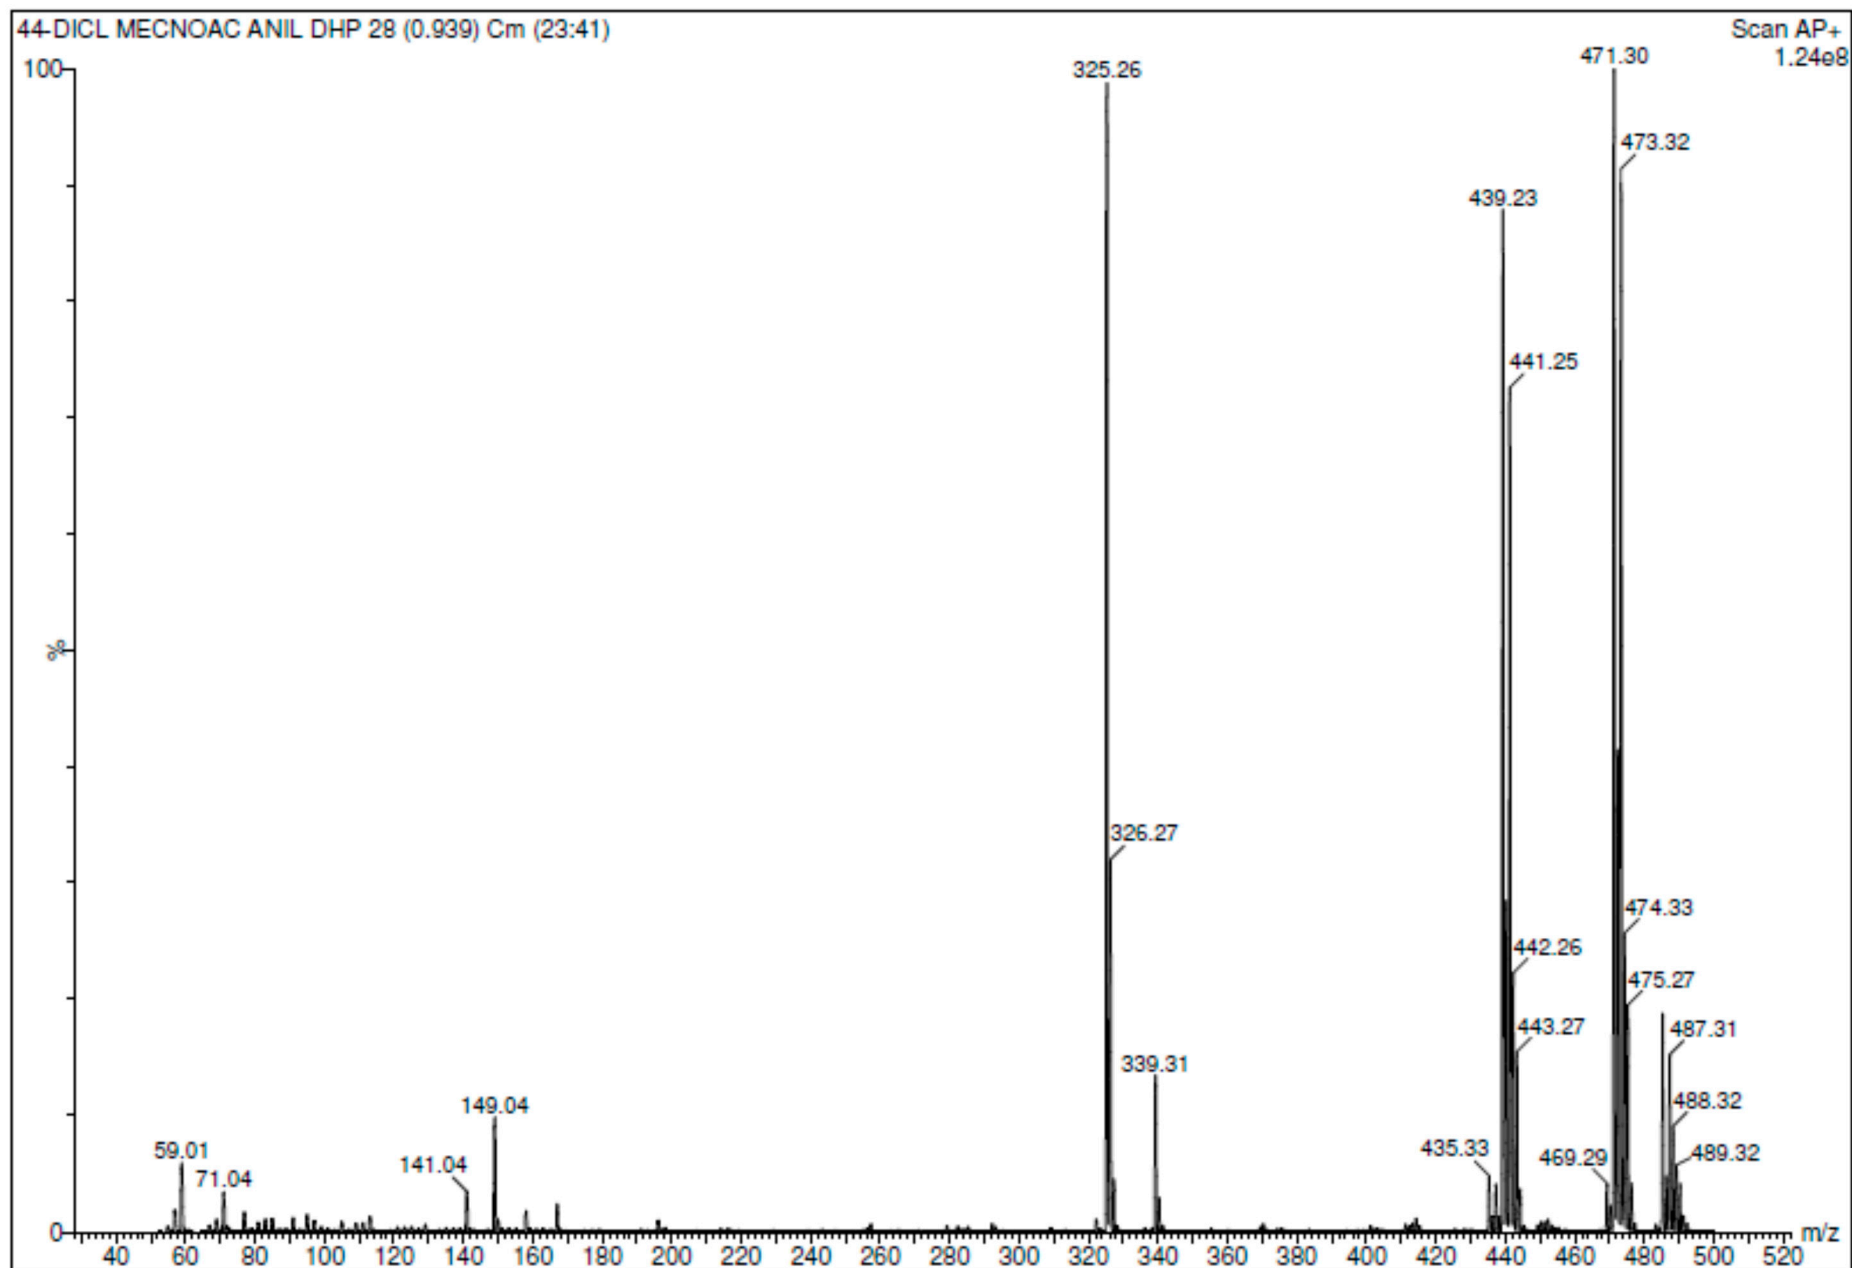

Figure S26 - MS spectrum of 29i

Table S2 - Fragmentation position for peaks in MS spectrum of 29i

| <u>m/z</u>             | <u>Fragmentation position and structure</u>                                                                                                                                                |
|------------------------|--------------------------------------------------------------------------------------------------------------------------------------------------------------------------------------------|
| <b>471.30 – 475.27</b> | <b>[M+H]<sup>+</sup></b><br>Multiple isotopes                                                                                                                                              |
| <b>439.23 – 443.27</b> | 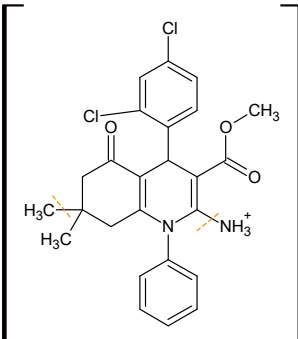 $\longrightarrow$    |
| <b>325.26</b>          |  $\longrightarrow$    |
| <b>326.27</b>          |  $\longrightarrow$  |



1.10. **Product 5j: 2-amino-7,8-dimethyl-5-oxo-1-(3-methylphenyl)-4-(3-nitrophenyl)-1,4,5,6,7,8-hexahydroquinoline-3-carbonitrile**

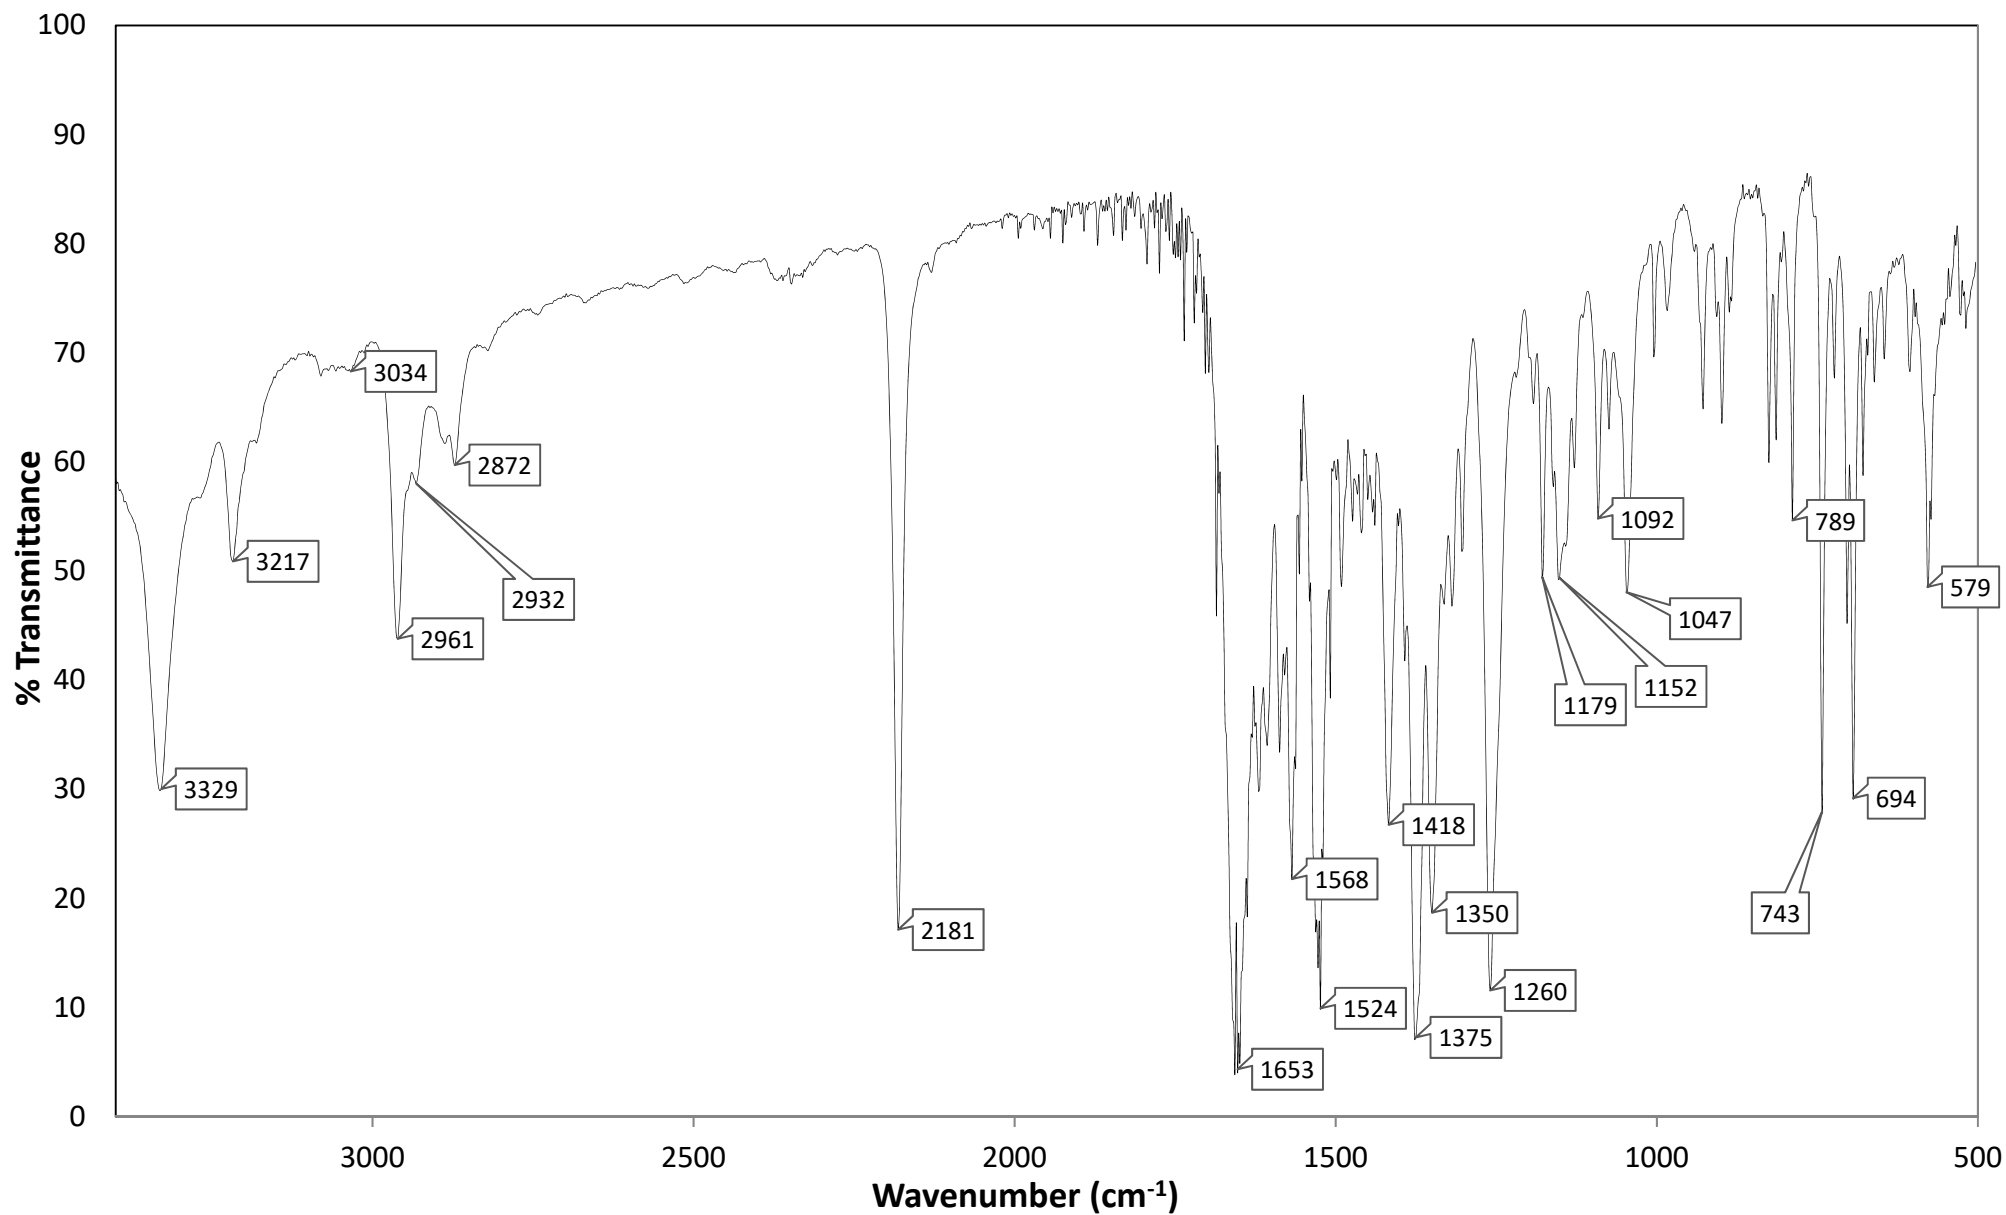

Figure S27 - IR spectrum of 5j

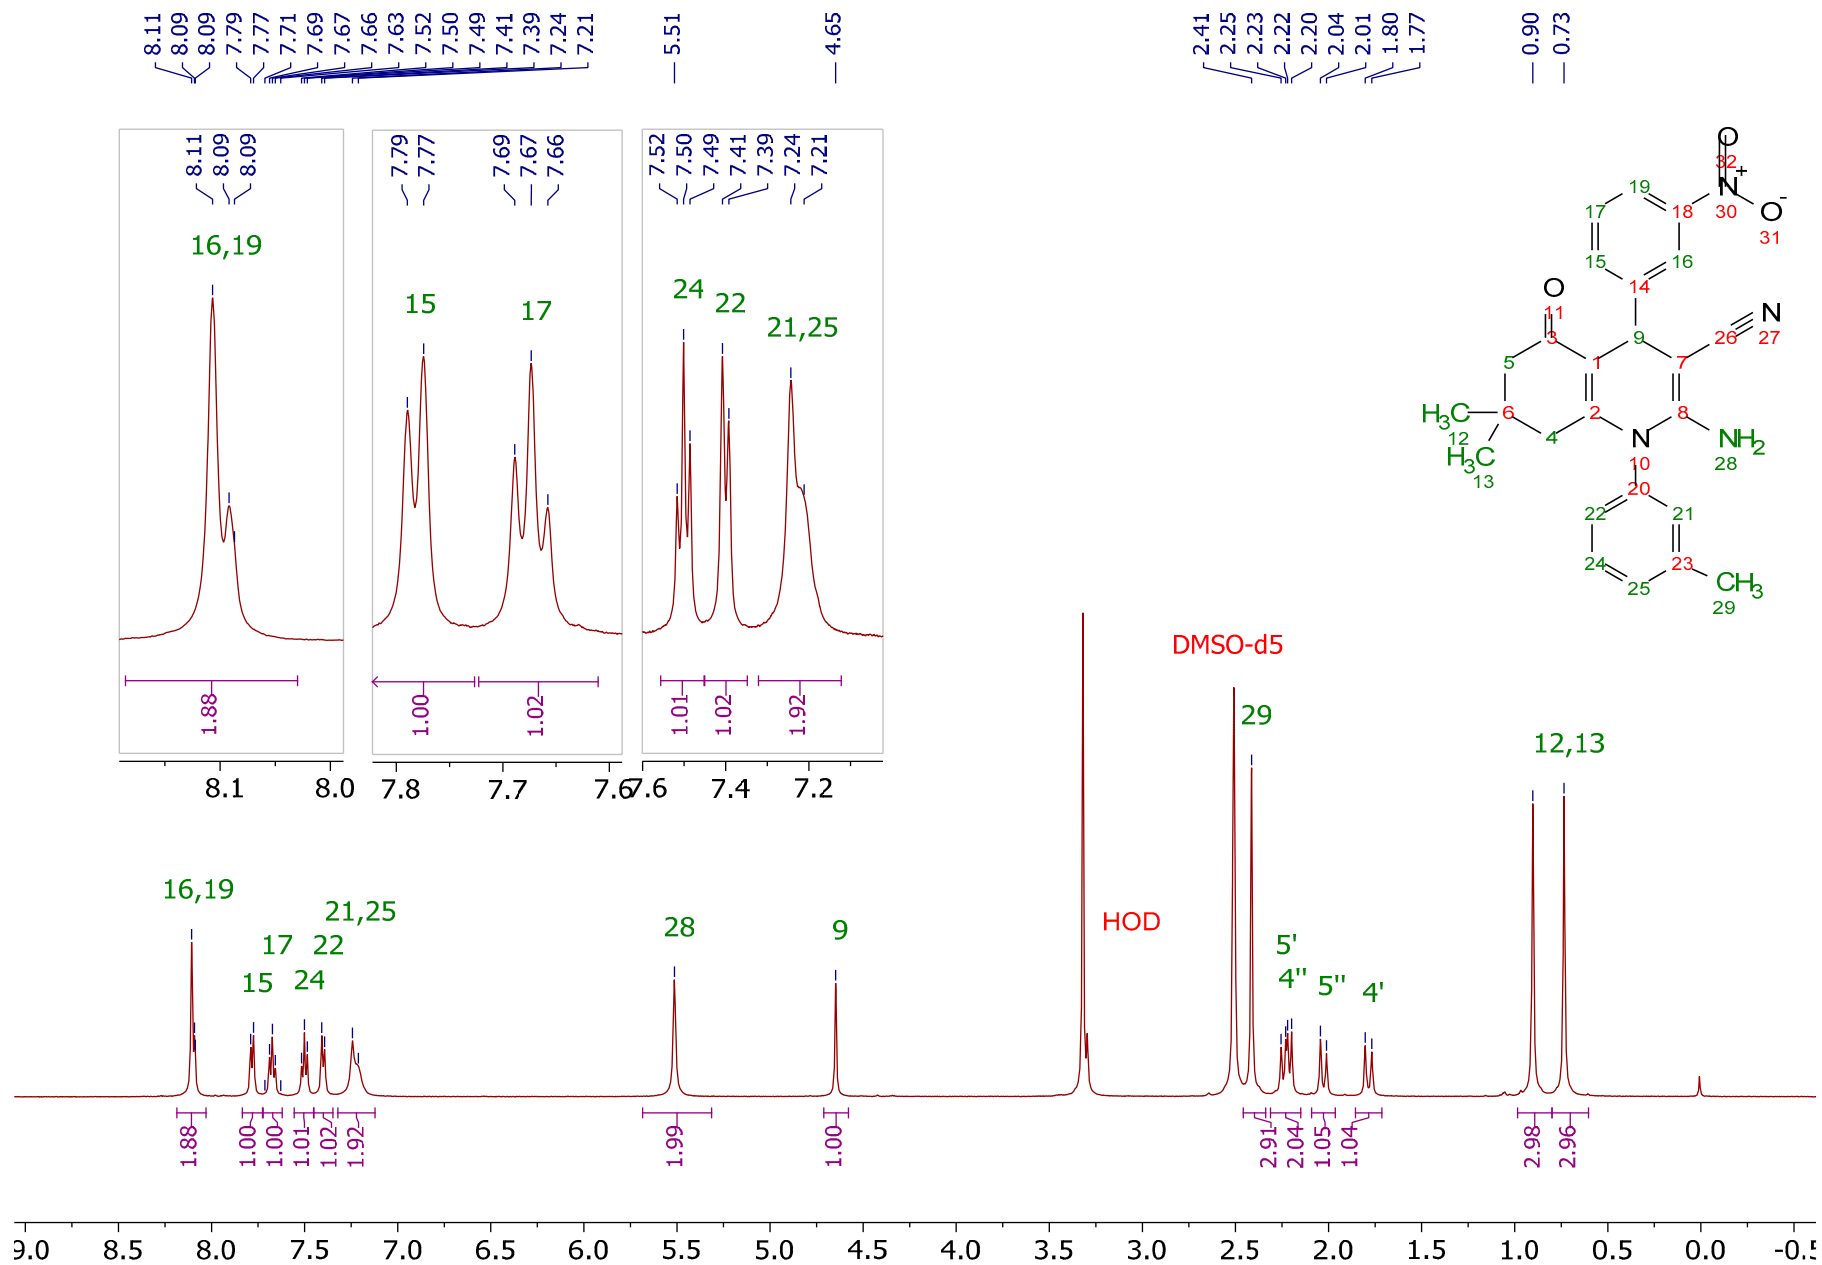

Figure S28 - <sup>1</sup>H NMR spectrum of 5j

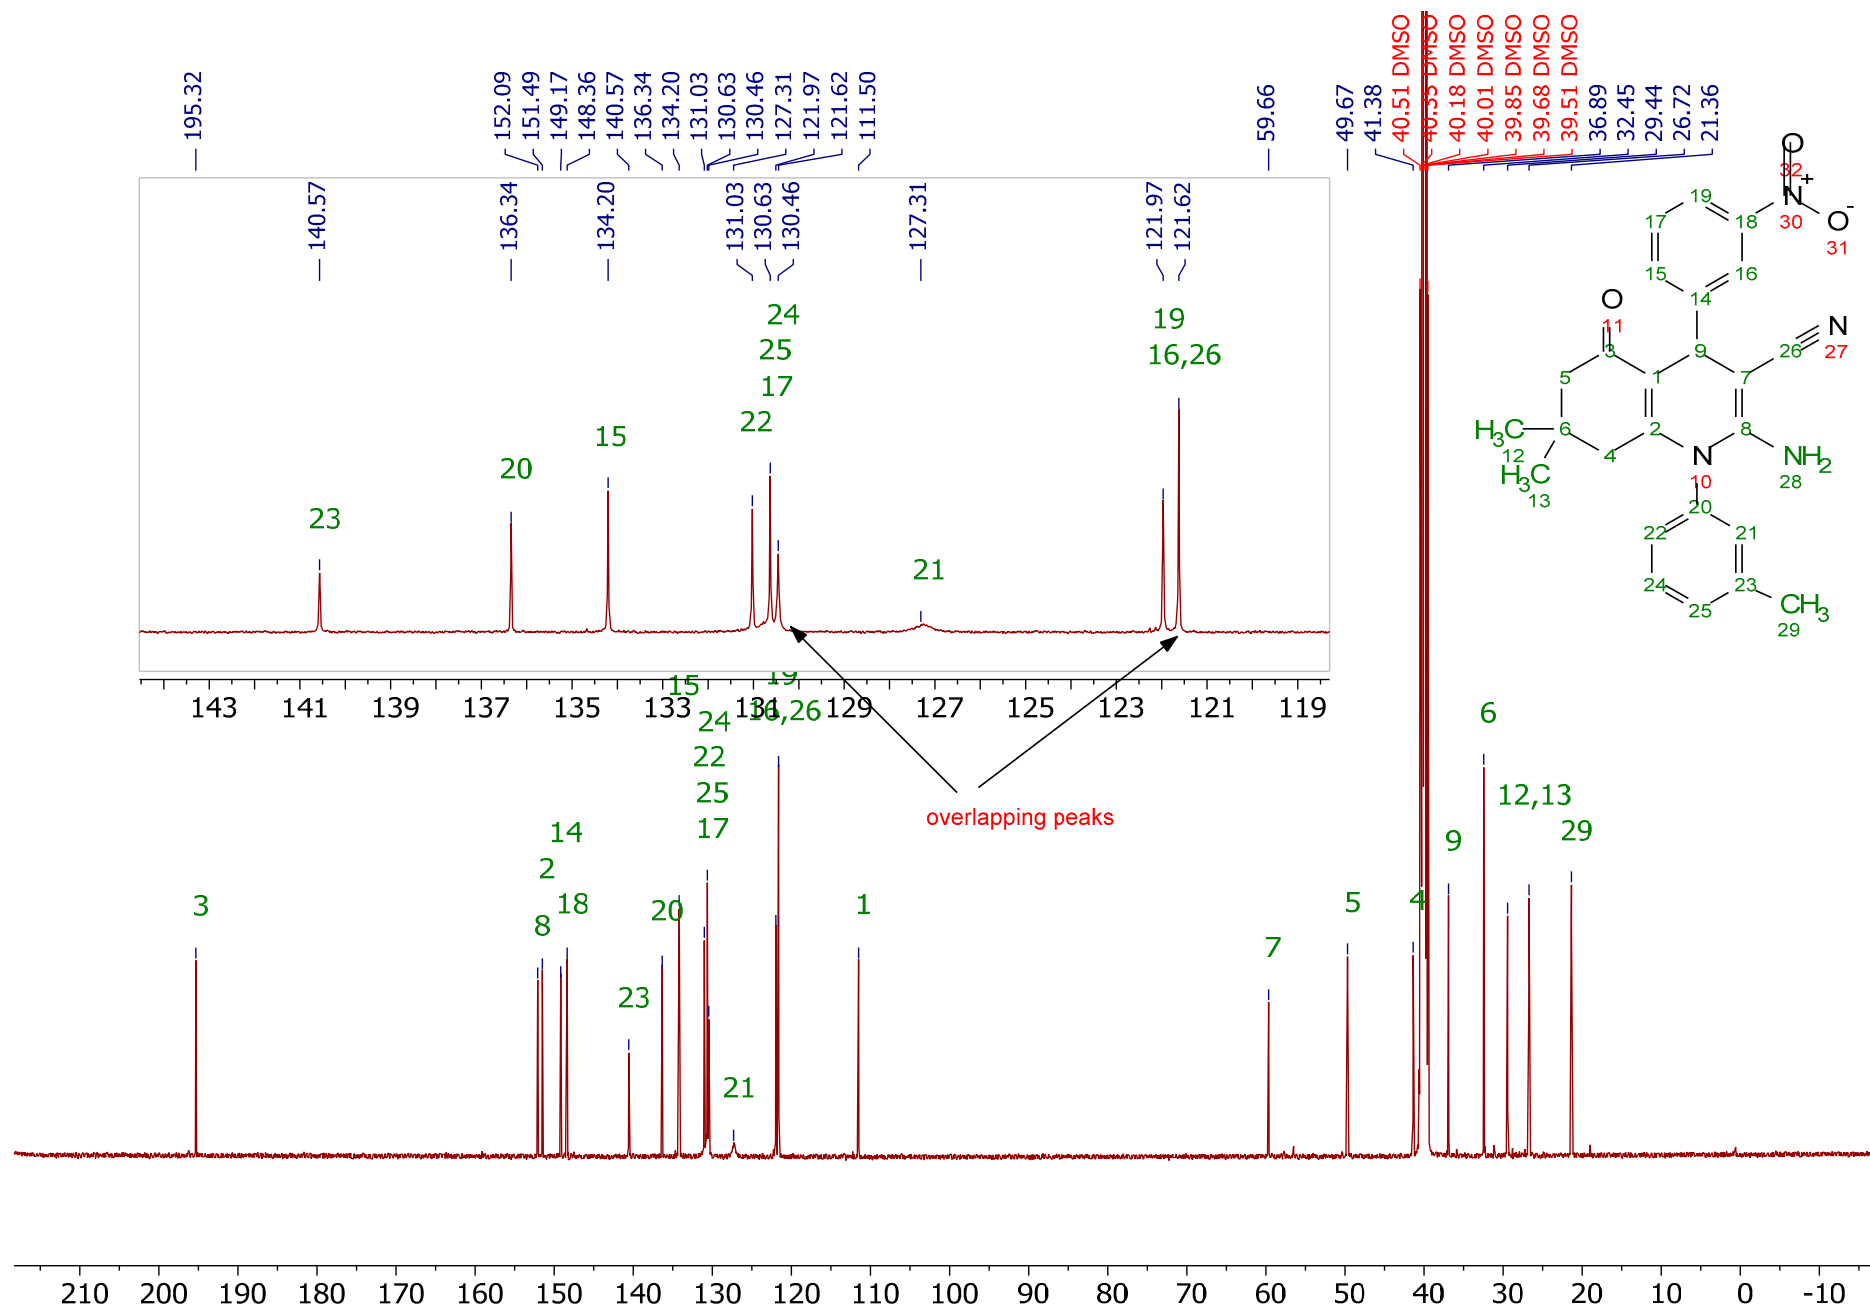

Figure S29 -  $^{13}\text{C}$  NMR spectrum of 5j

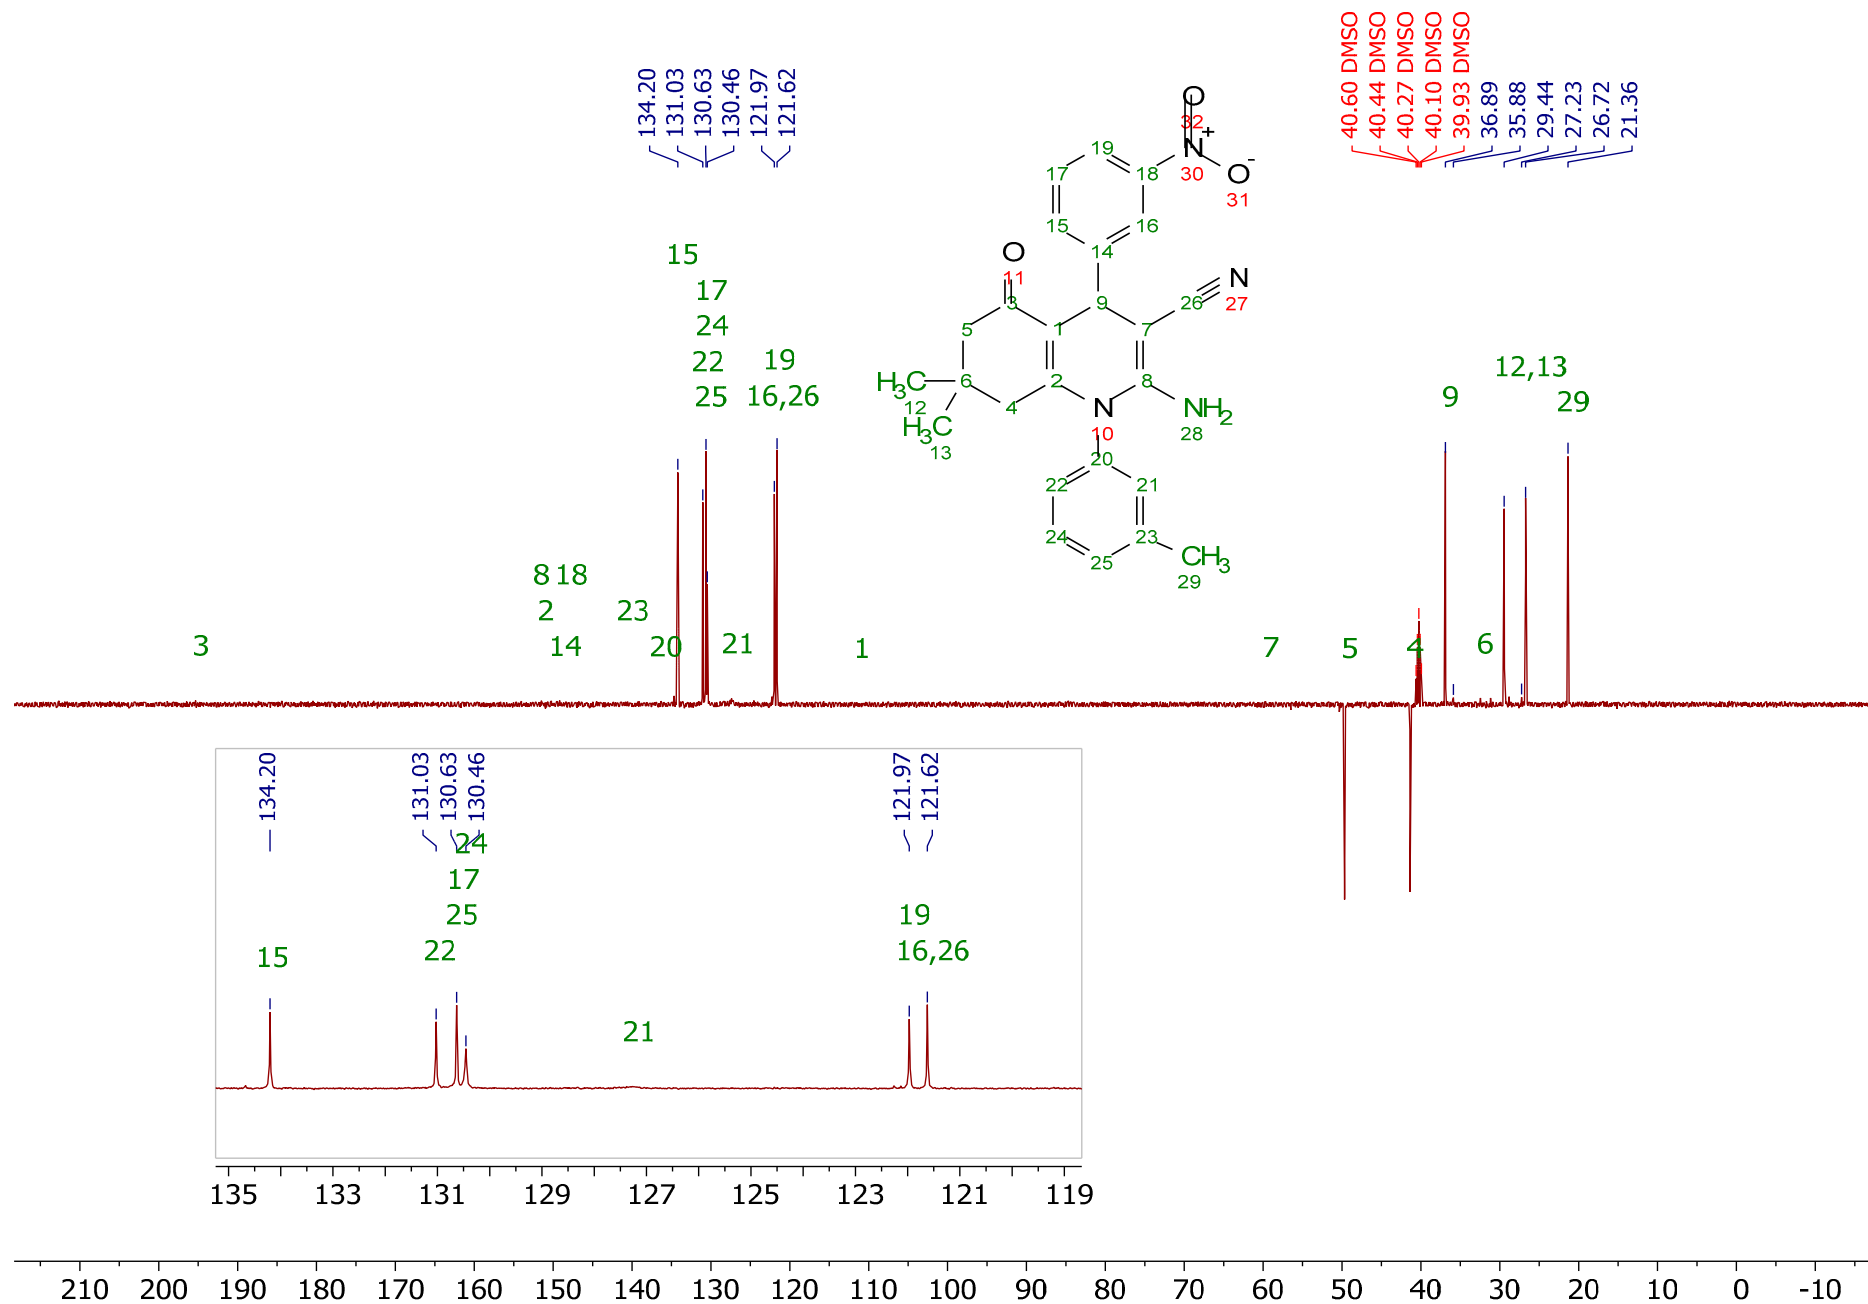

Figure S30 - DEPT spectrum of 5j

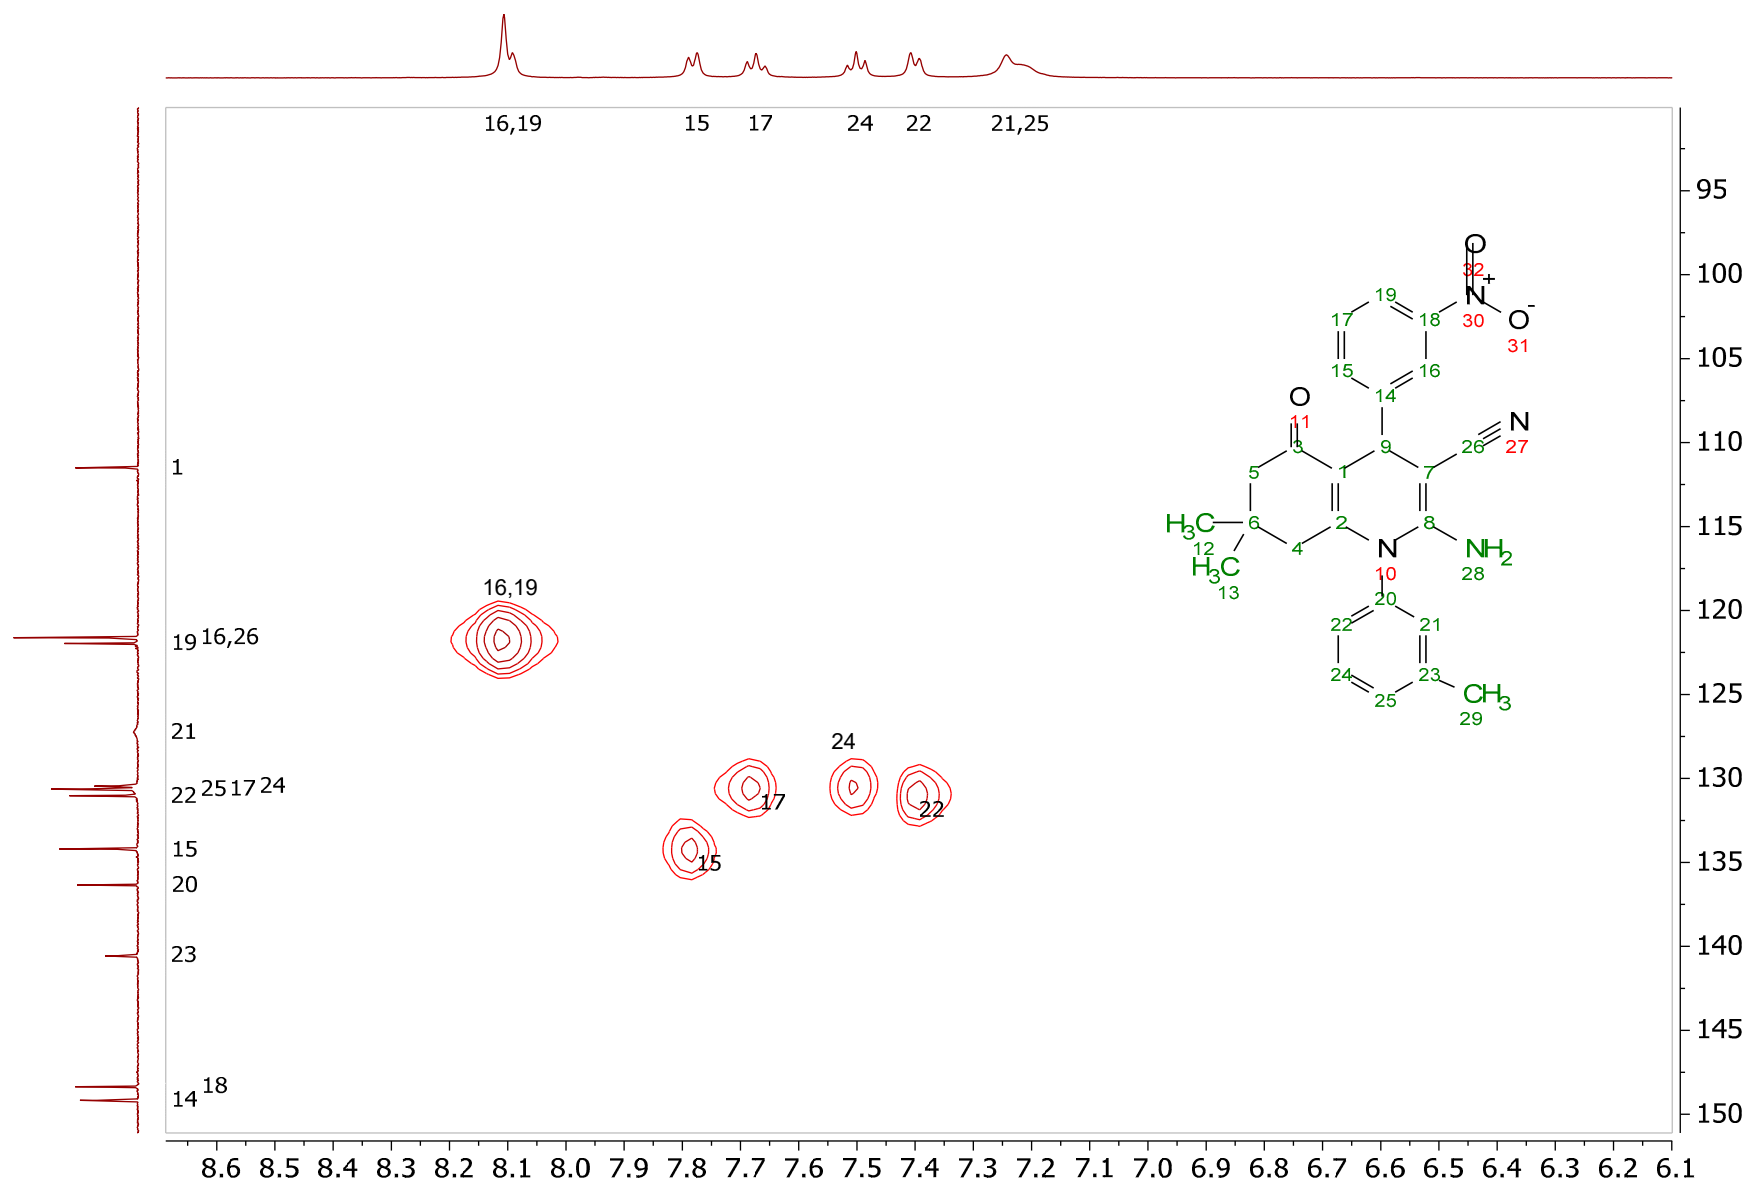

Figure S31 – Downfield region of HSQC NMR spectrum of 5j

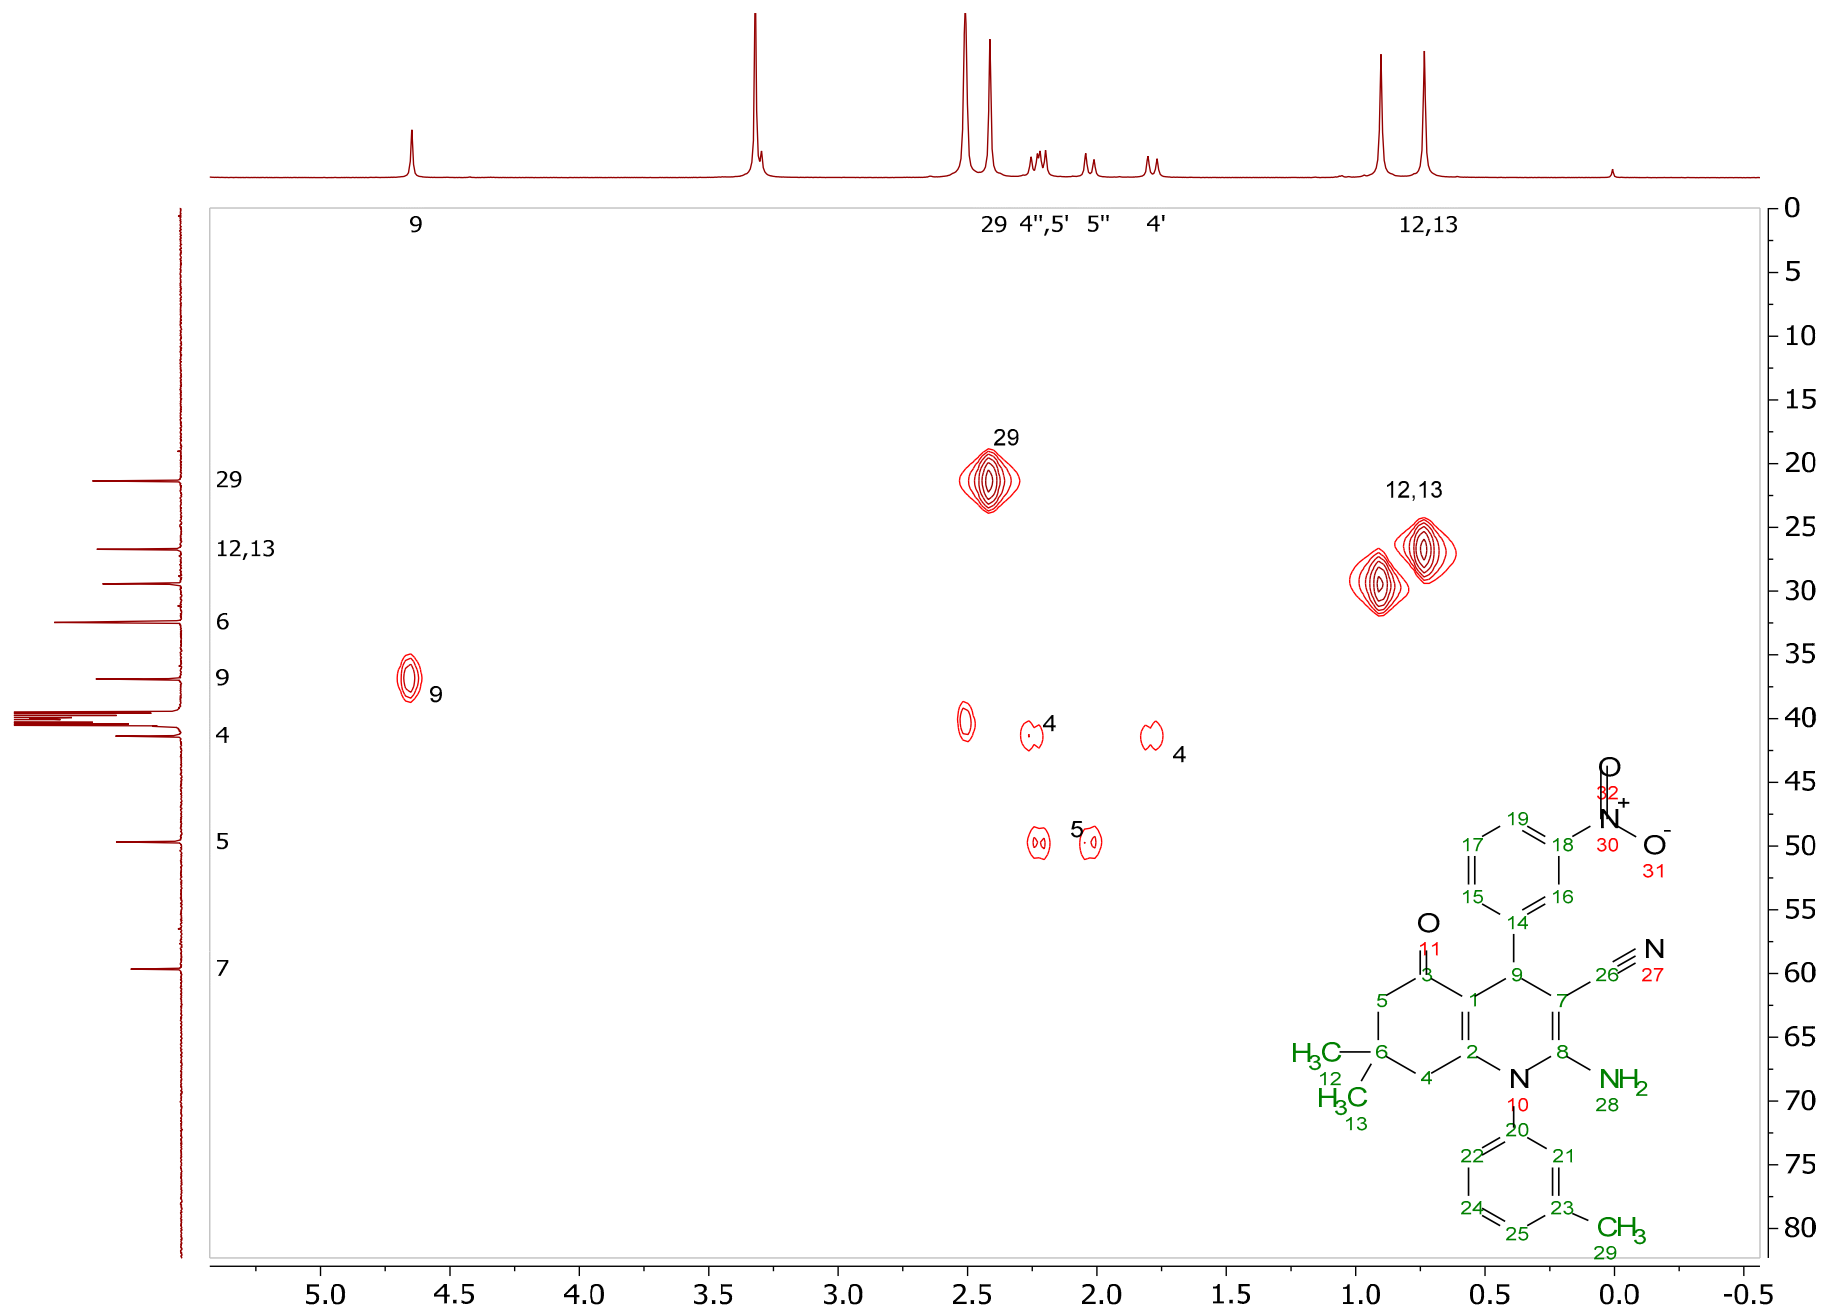

Figure S32 - Upfield region of HSQC spectrum of 5j

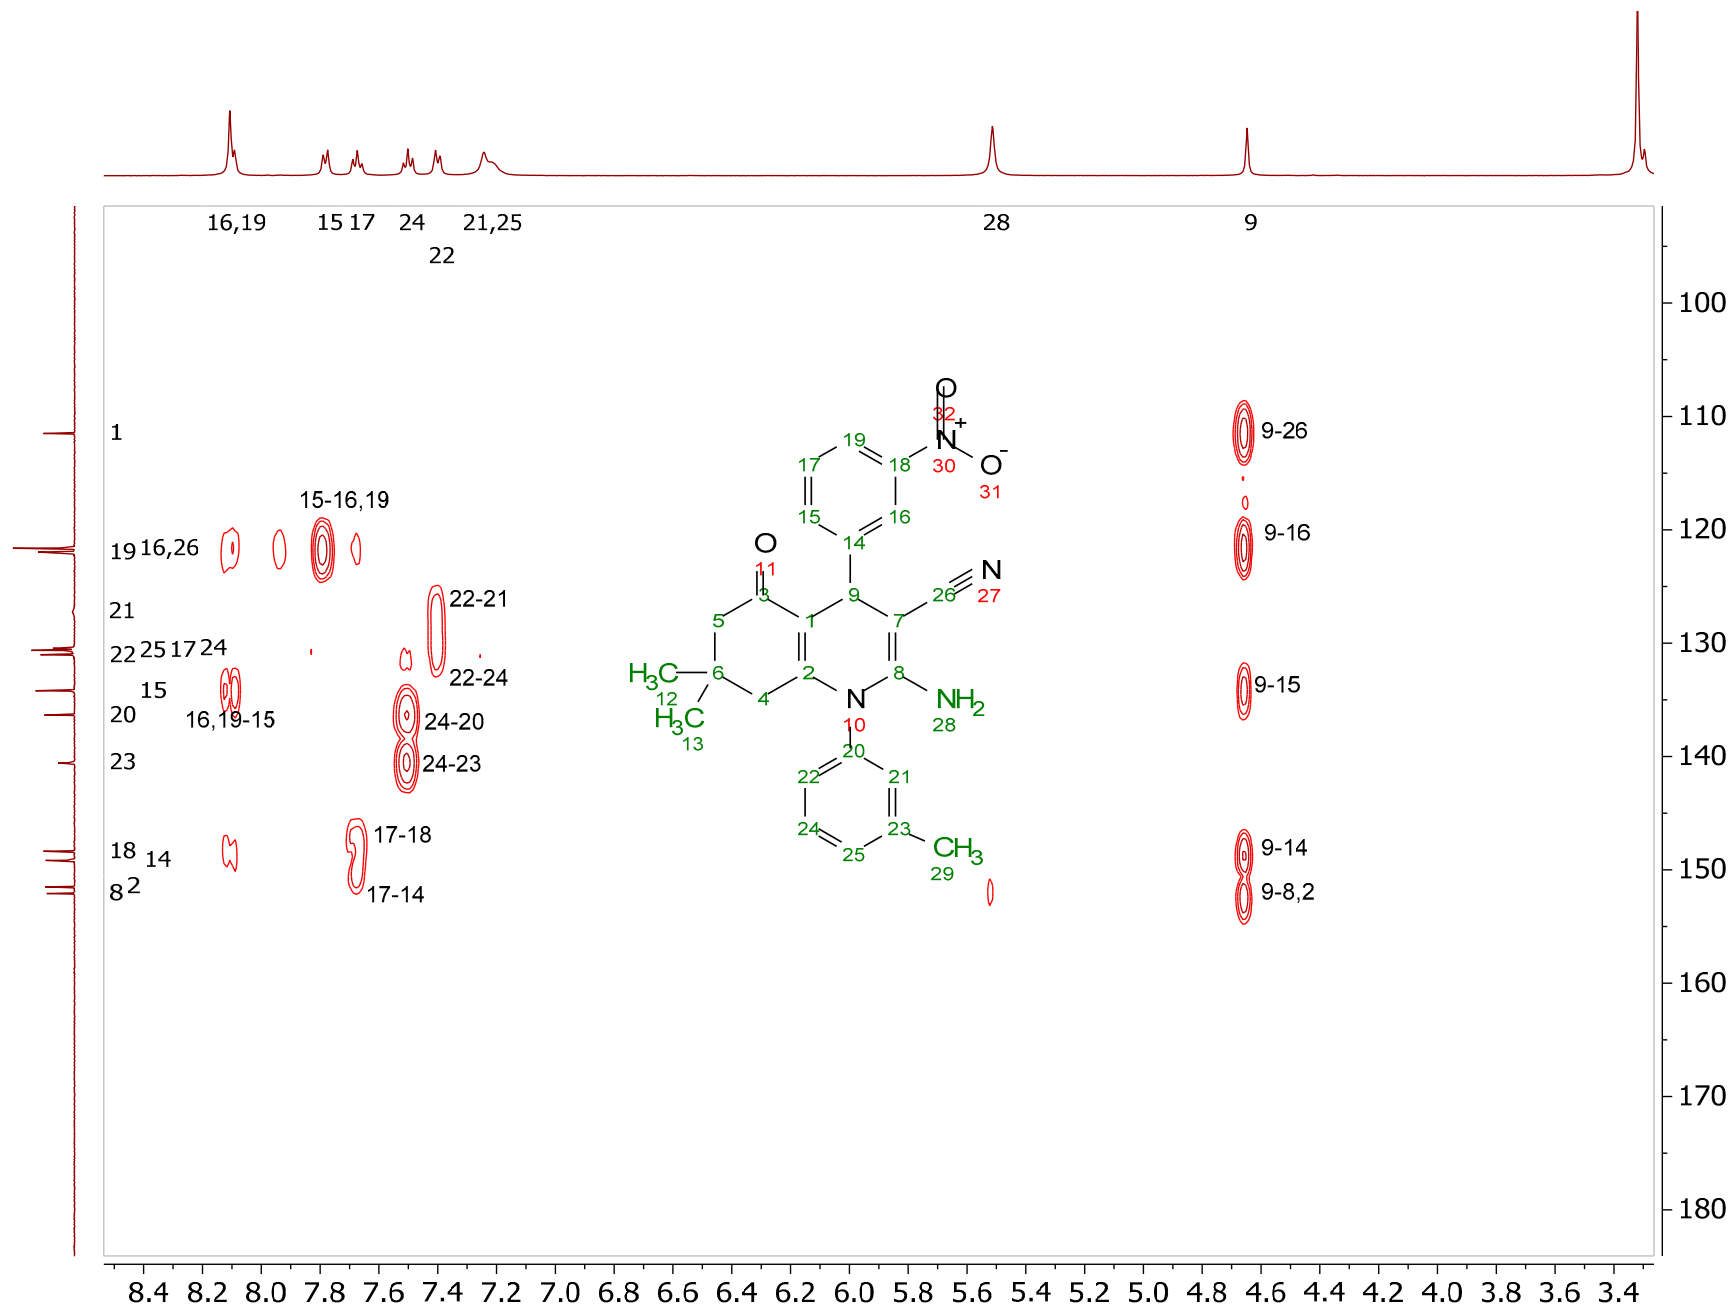

Figure S33 - Downfield region of HMBC spectrum of 5j

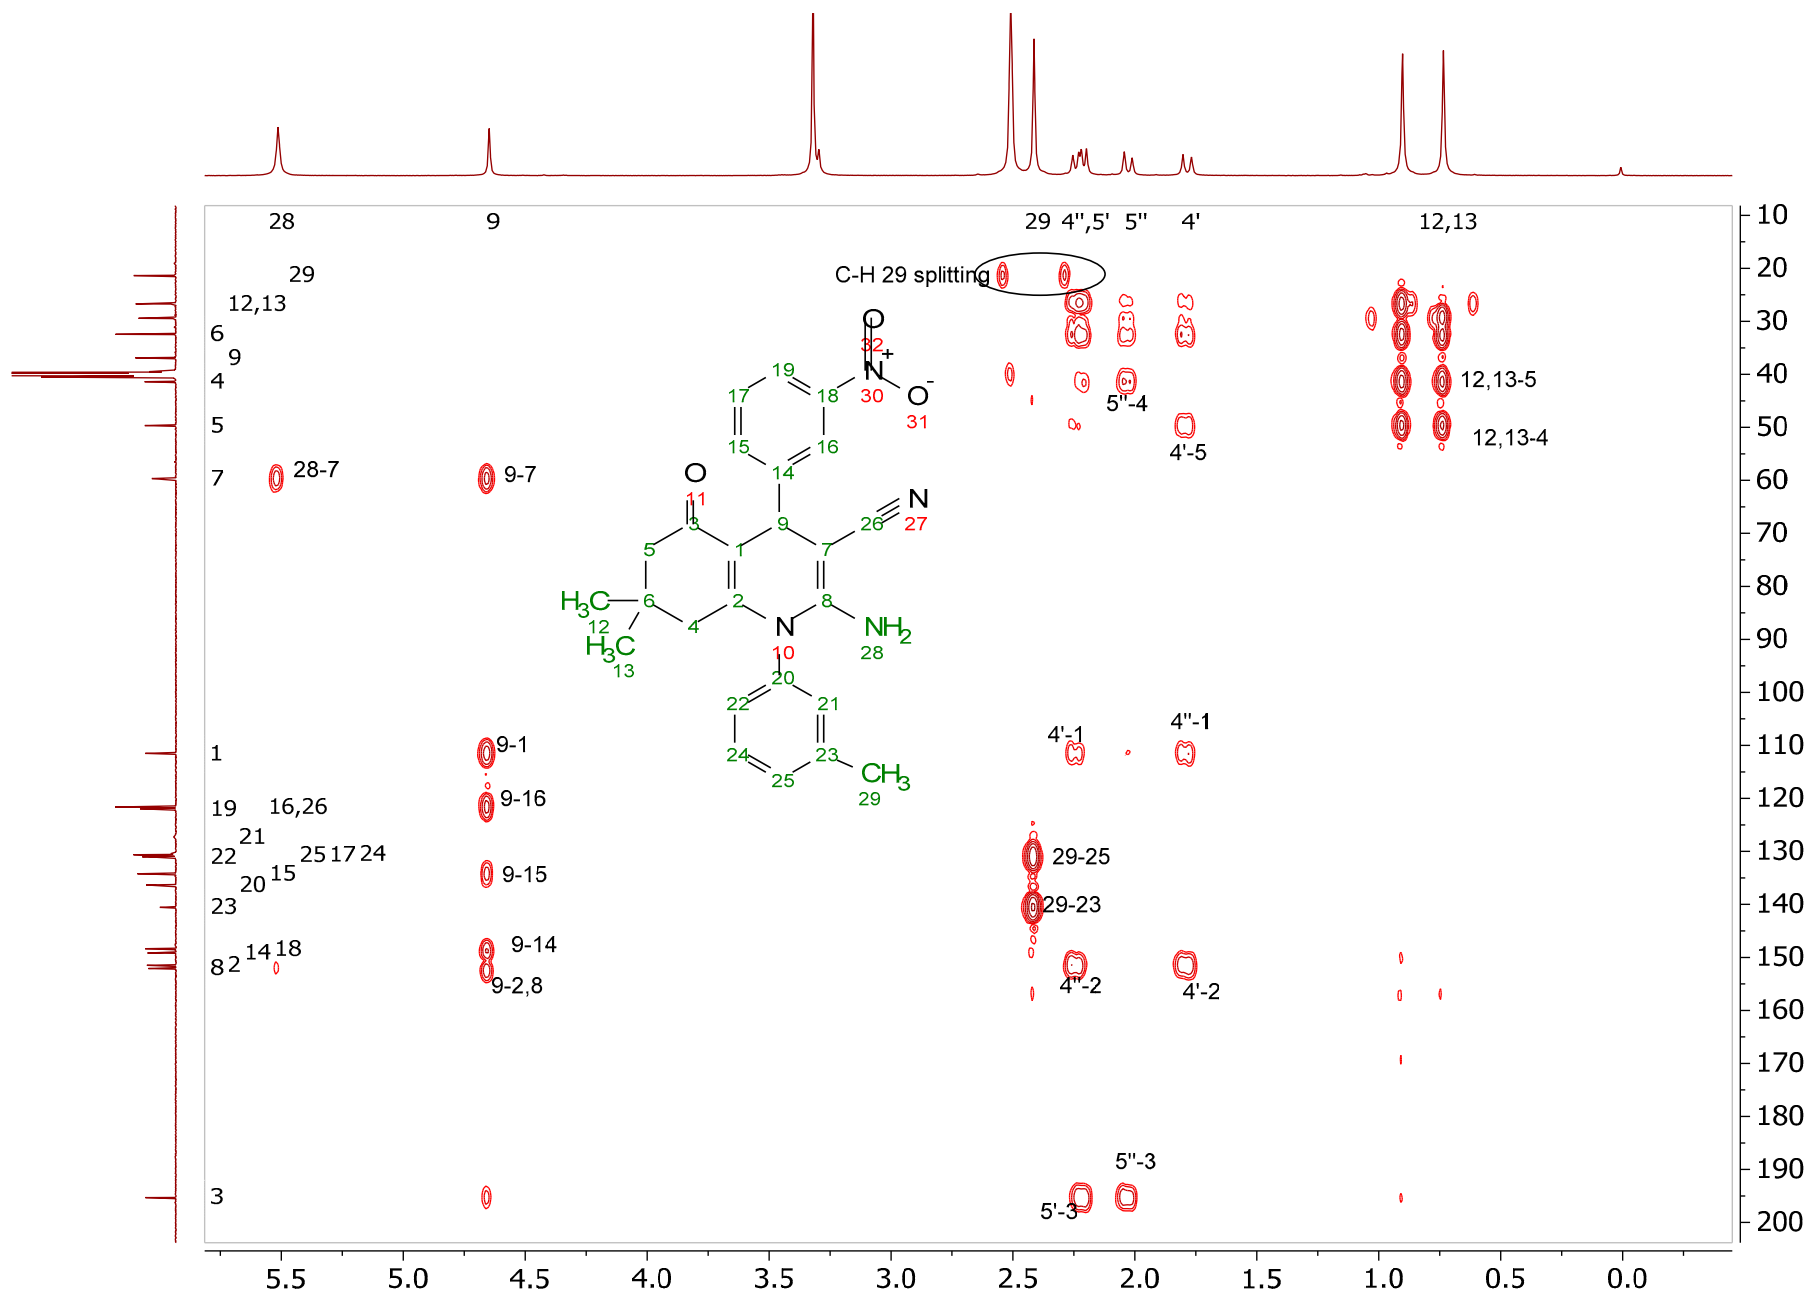

Figure S34 - Upfield region of HMBC spectrum of 5j



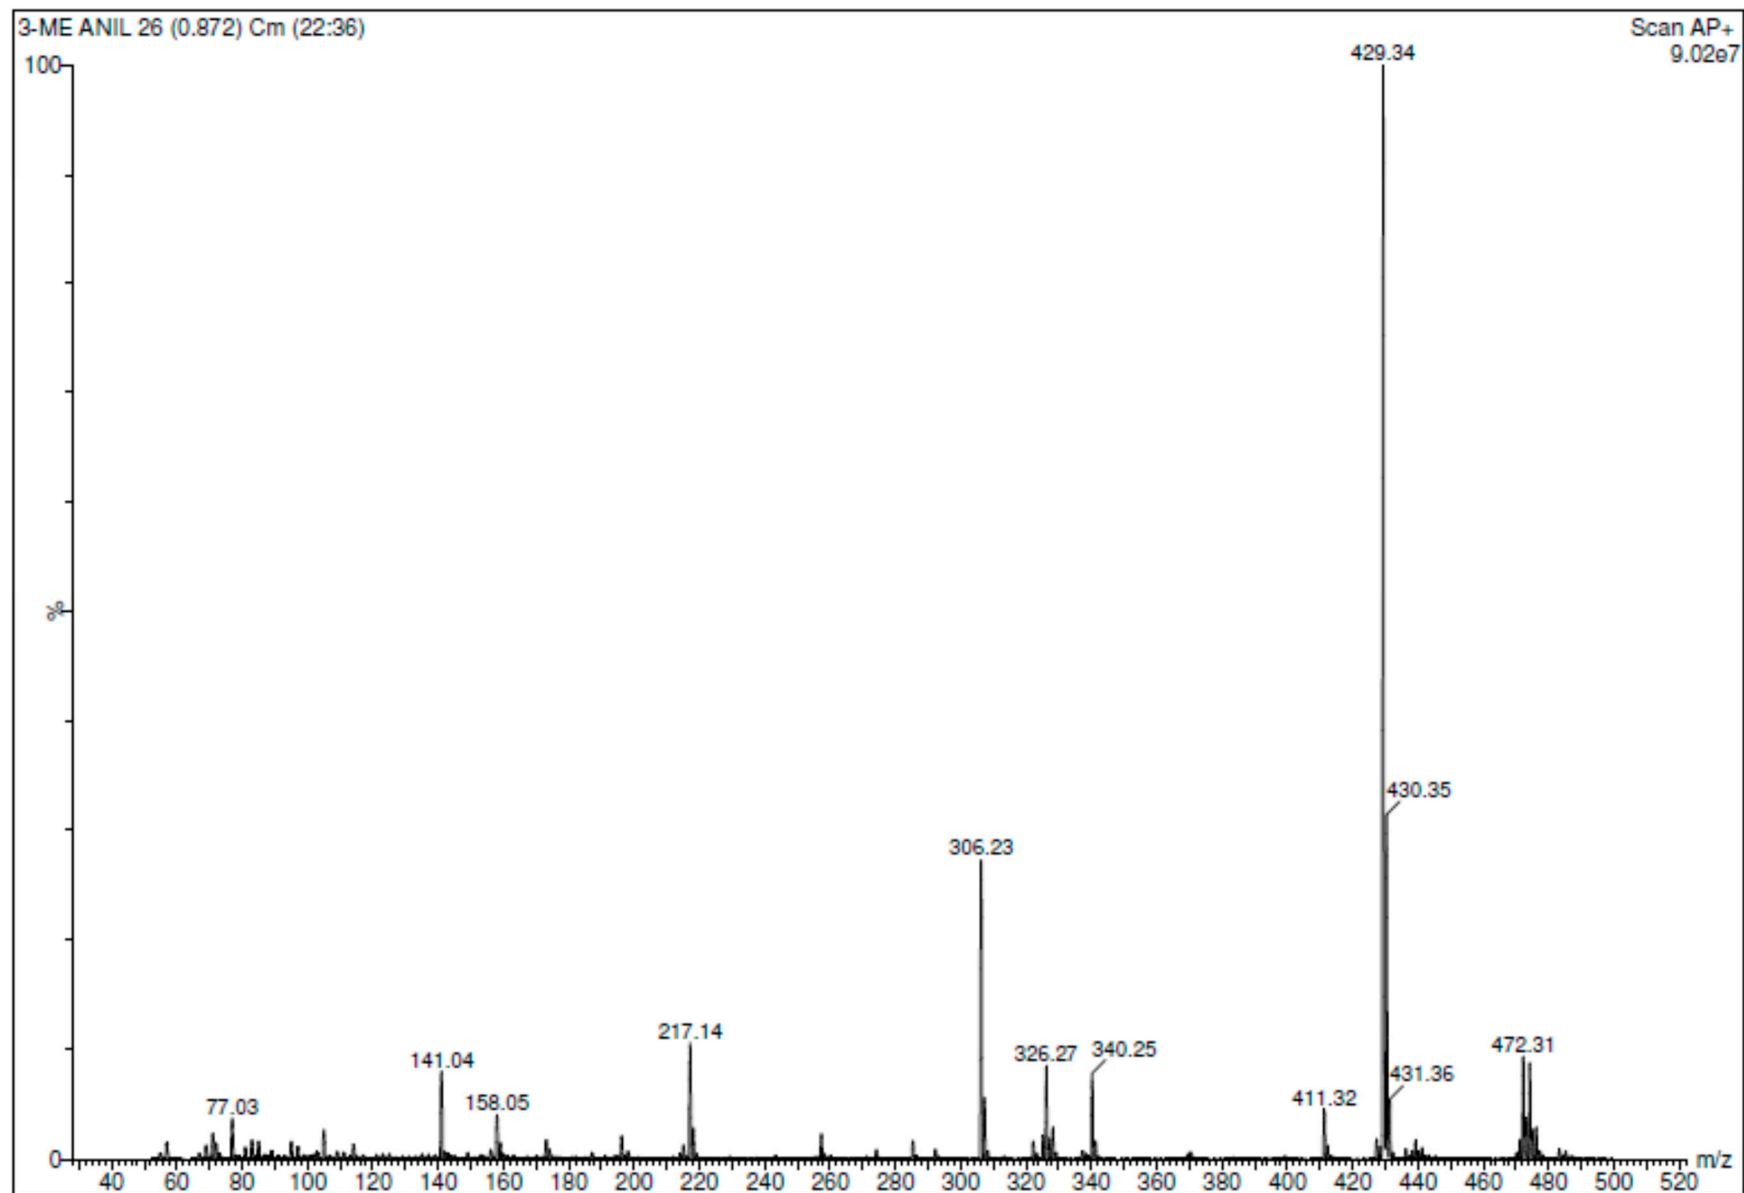

Figure S35 - MS spectrum of 5j

Table S3 - Fragmentation positions for peaks in MS spectrum of 5j

| <u>m/z</u> | <u>Fragmentation position and structure</u>                                         |
|------------|-------------------------------------------------------------------------------------|
| 429.34     | [M+H] <sup>+</sup>                                                                  |
| 340.25     | 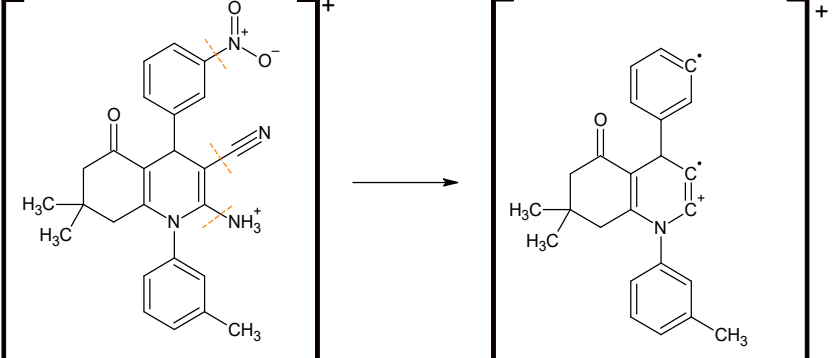  |
| 306.23     |  |

1.11. Product 5k: 2-amino-1-(3-chlorophenyl)-4-(2,4-dichlorophenyl)-7,8-dimethyl-5-oxo-1,4,5,6,7,8-hexahydroquinoline-3-carbonitrile

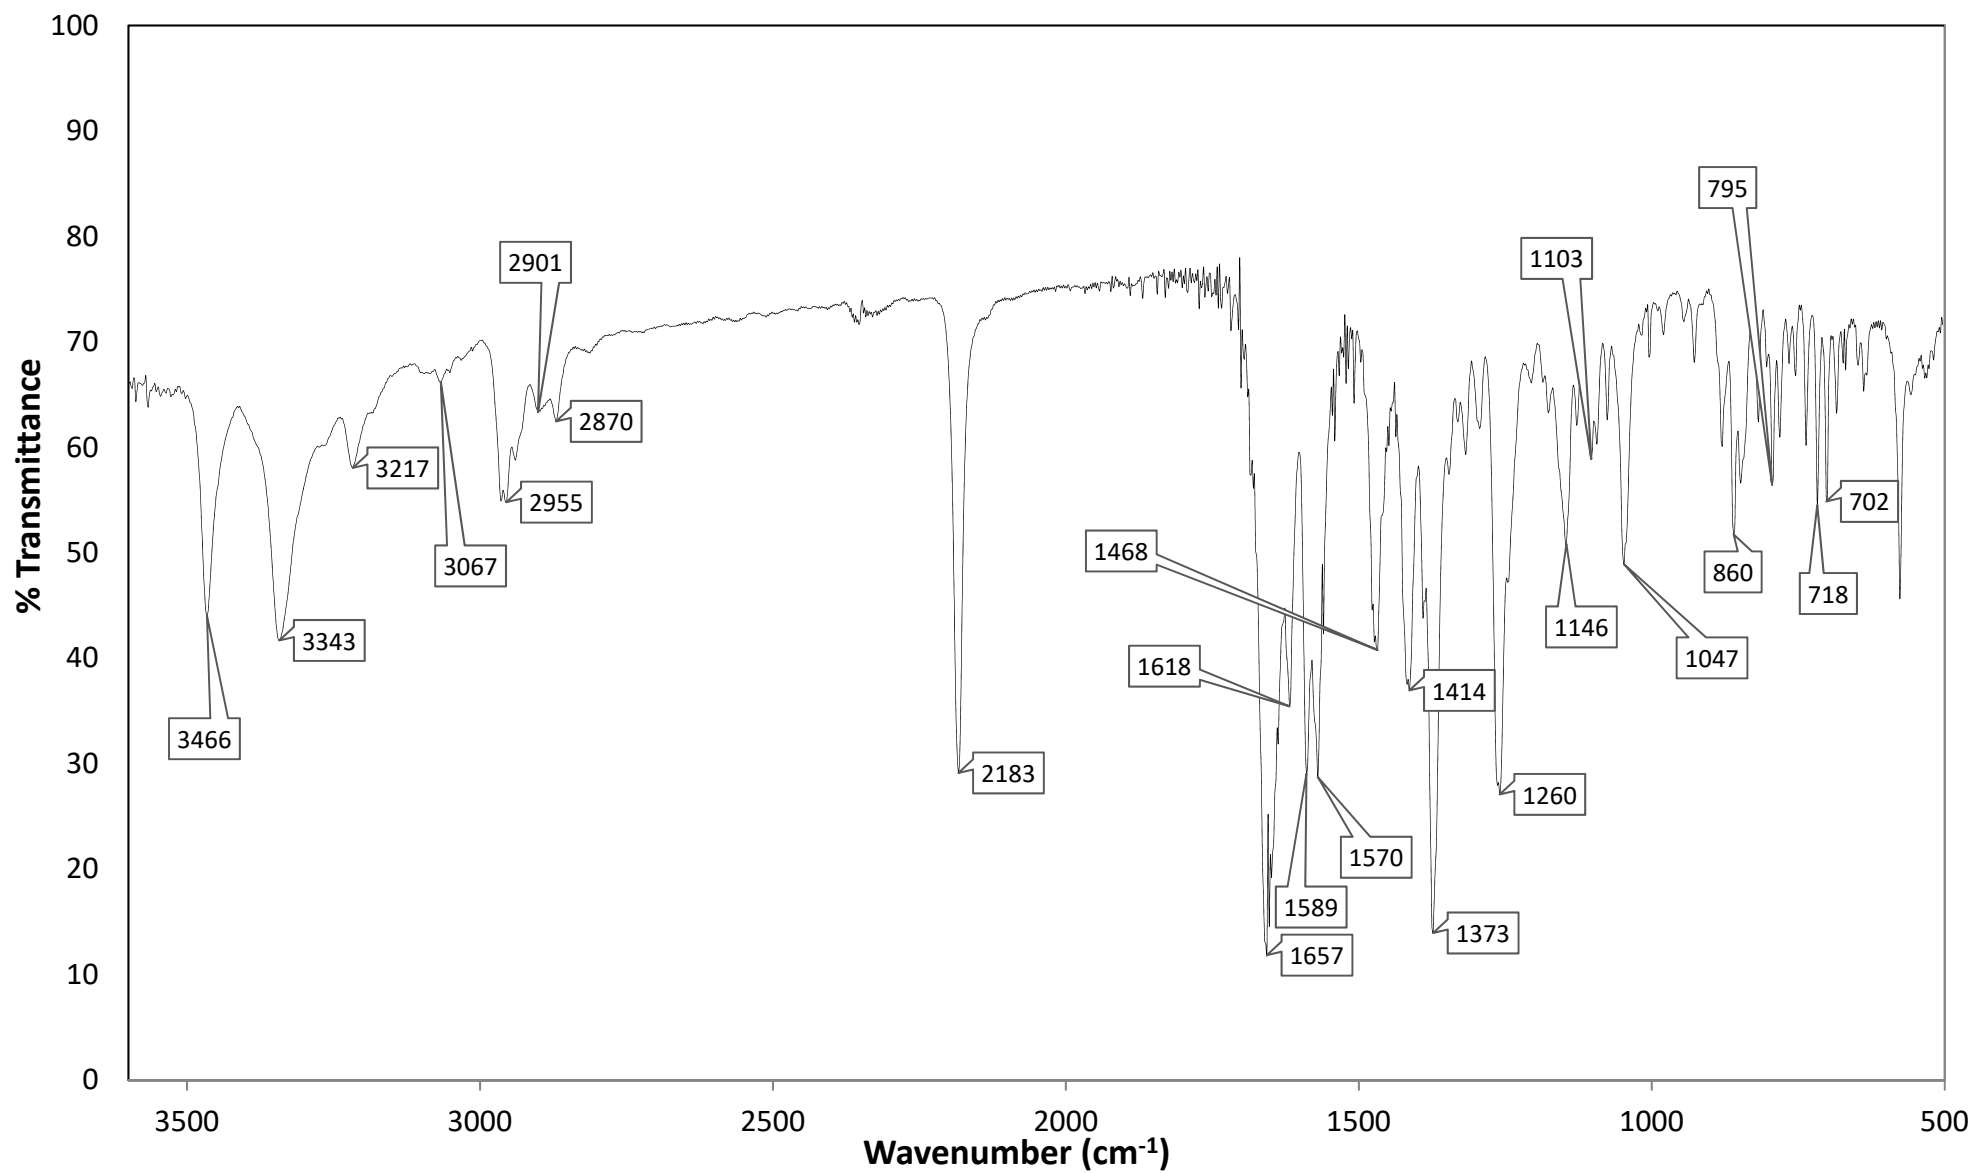

Figure S36 - IR spectrum of 5k

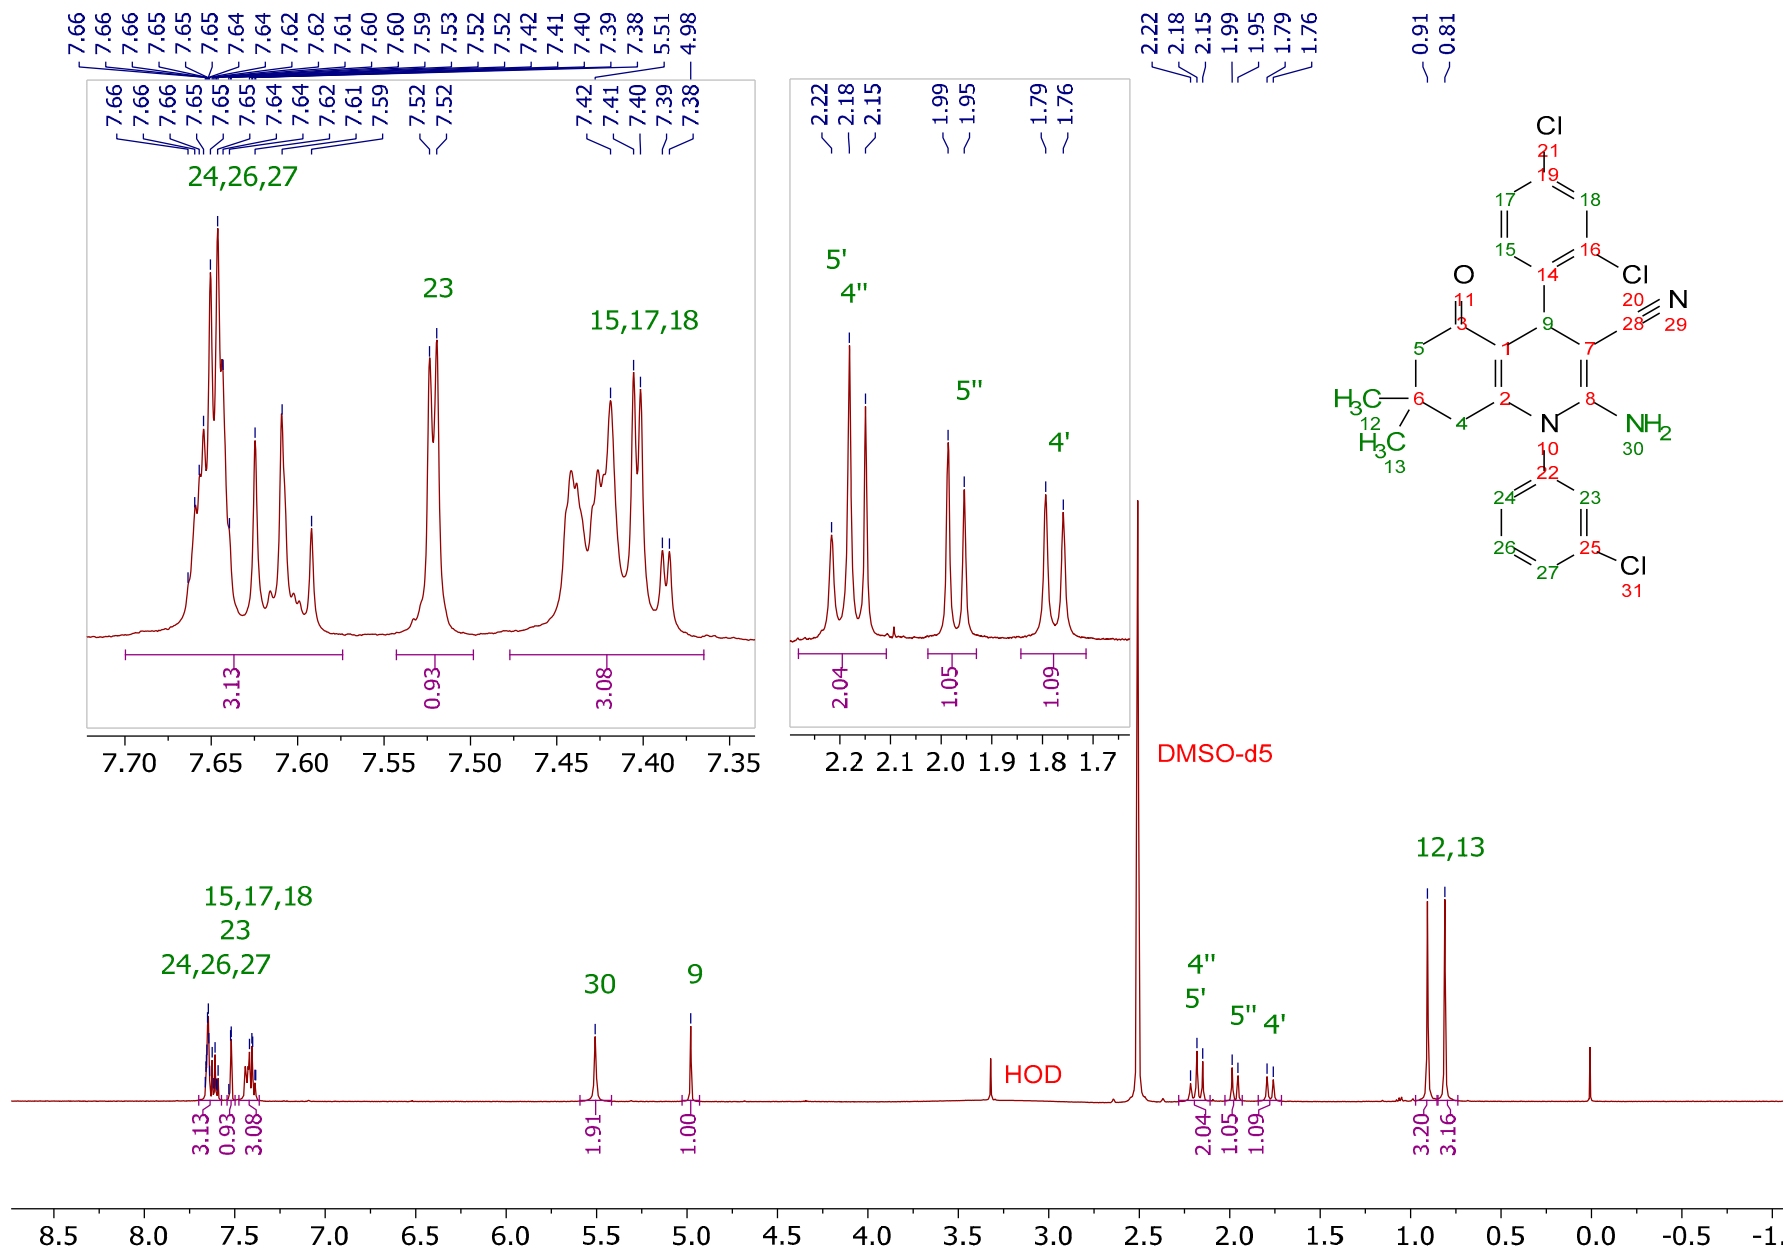

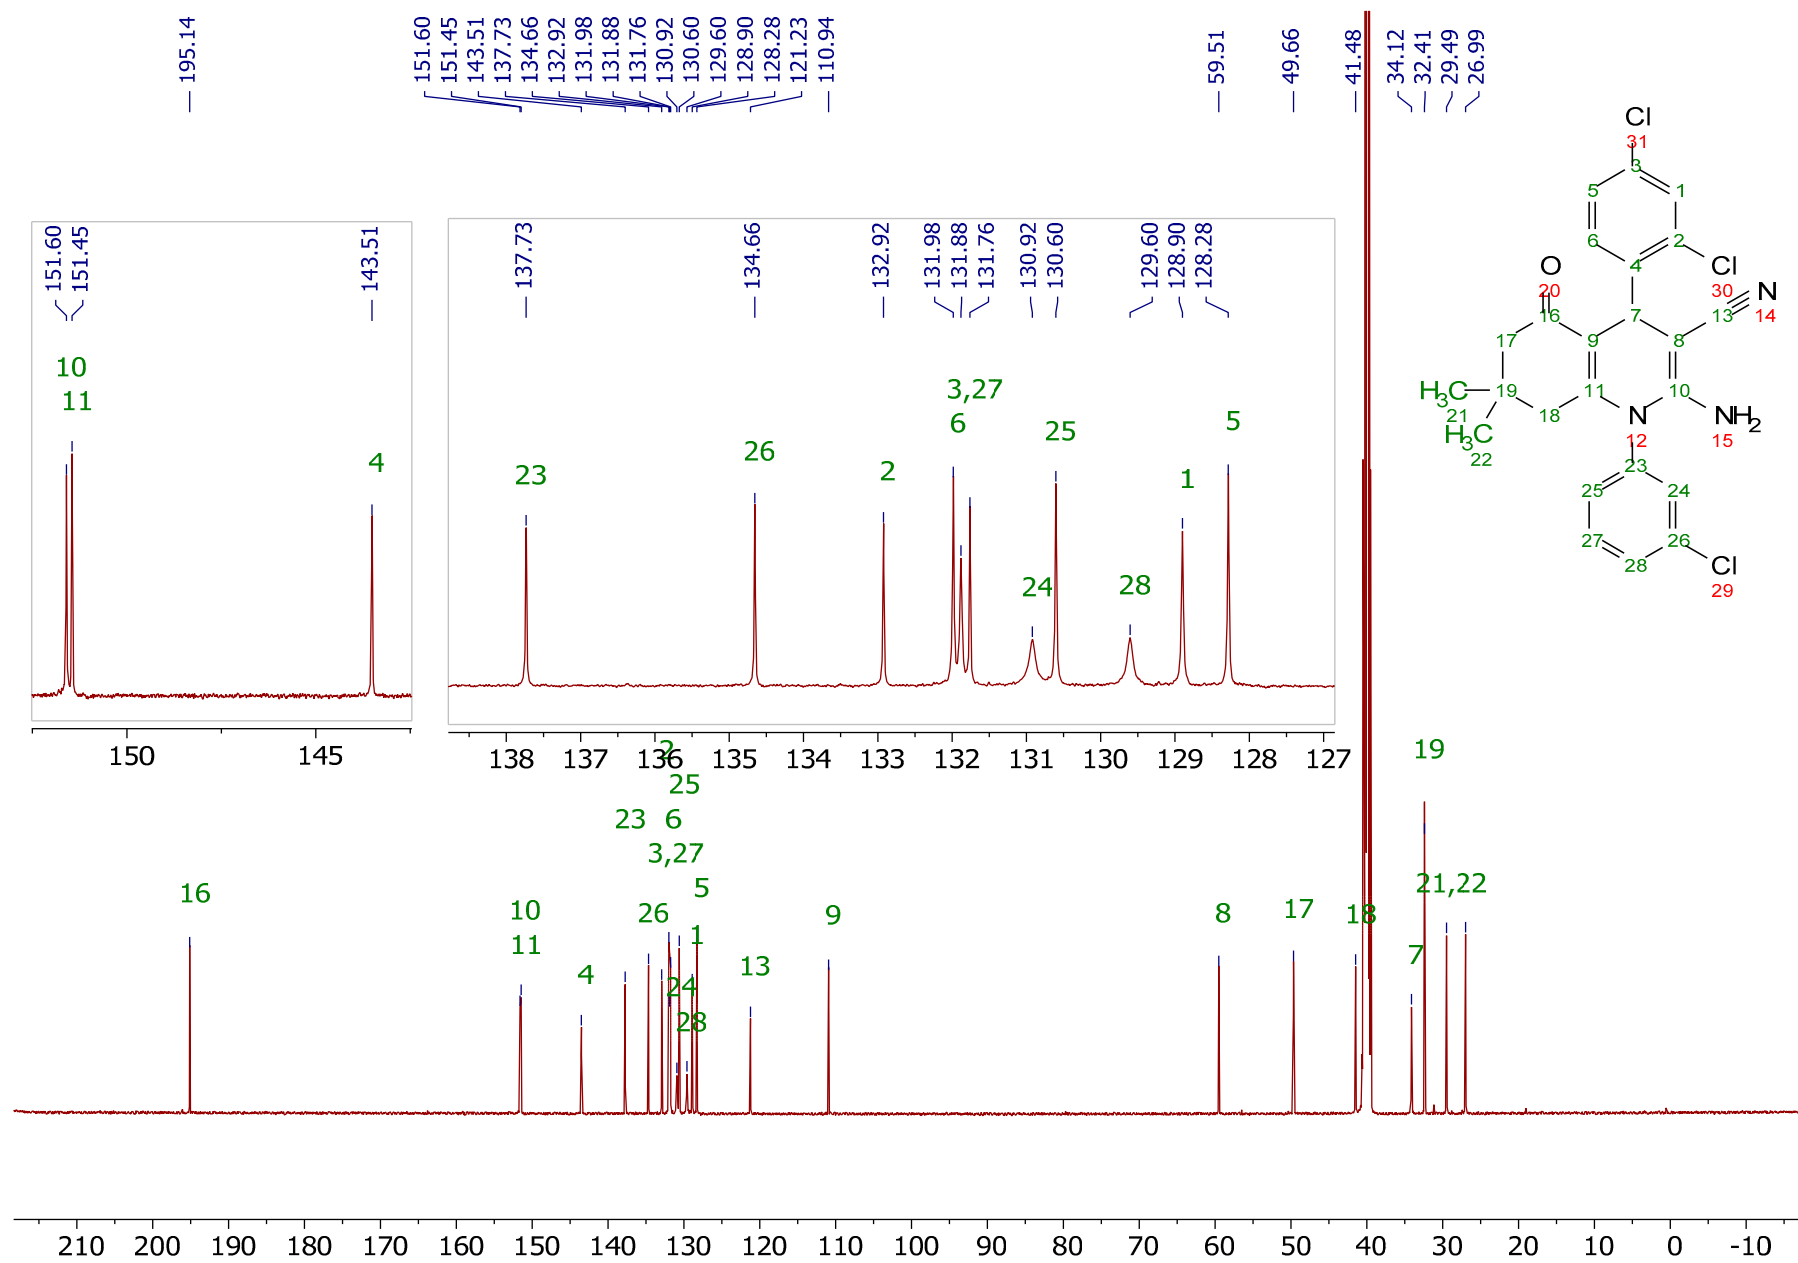

Figure S38 -  $^{13}\text{C}$  NMR spectrum of **5k**

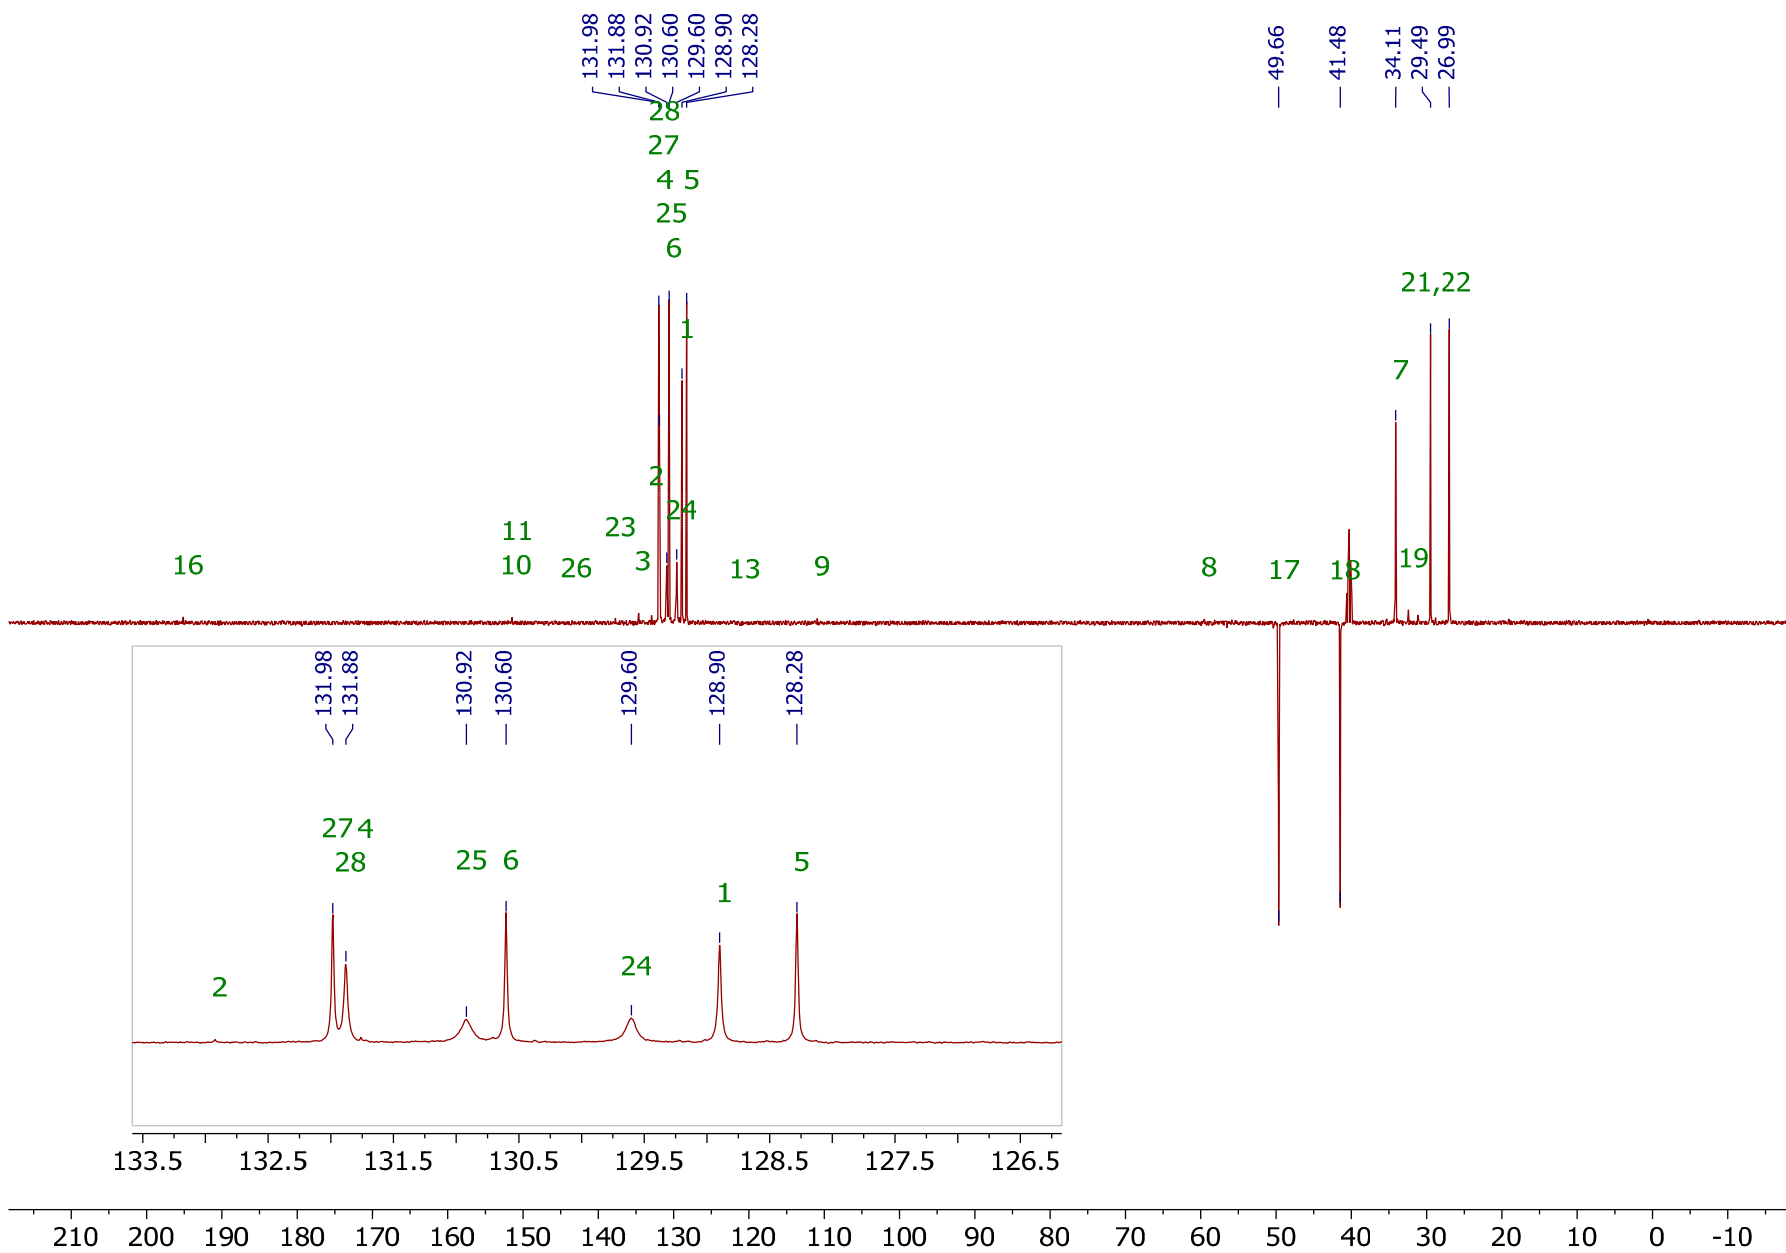

Figure S39 - DEPT spectrum of 5k

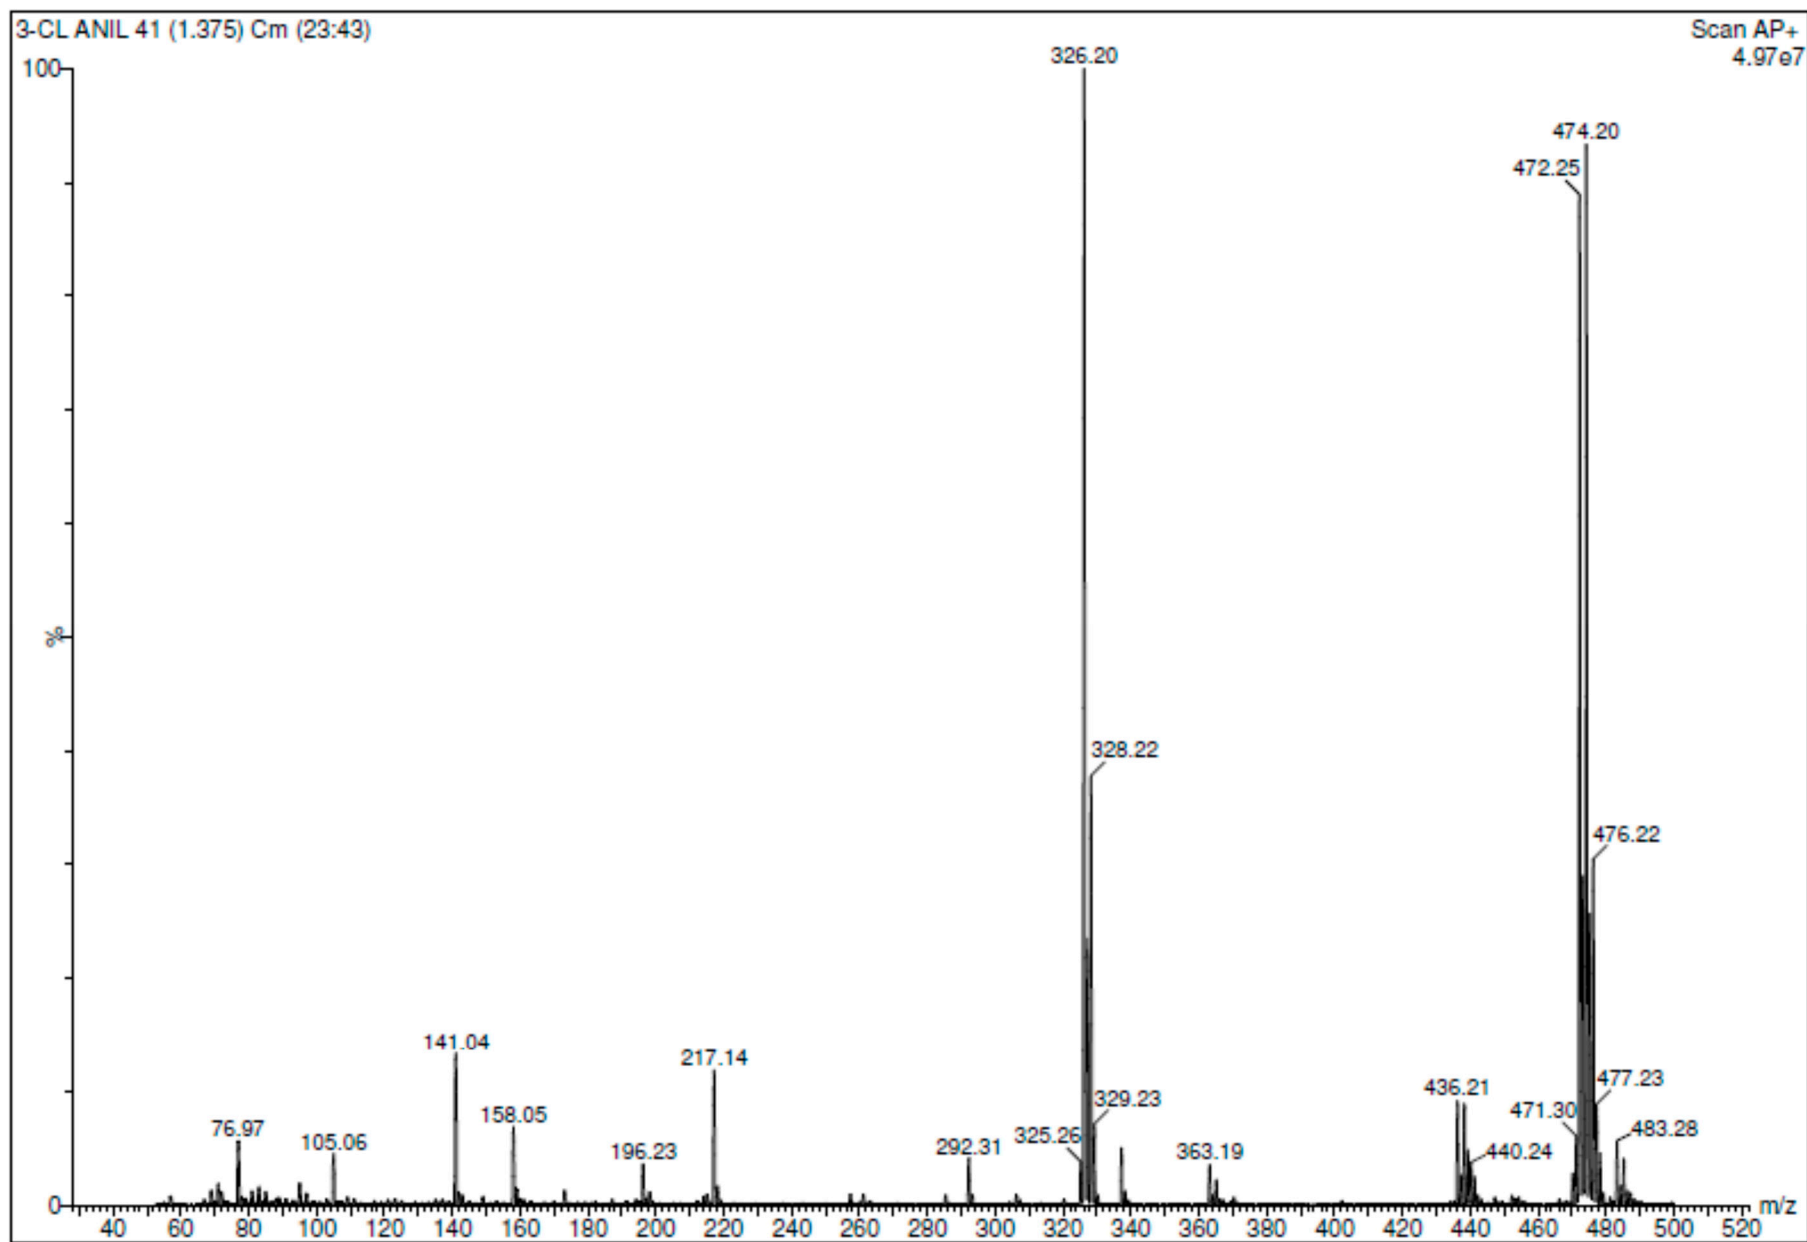

Figure S40 - MS spectrum of 5k

Table S4 - Fragmentation positions for peaks in MS spectrum of 5k

| <u>m/z</u>      | <u>Fragmentation position and structure</u>                                                                                                                                              |
|-----------------|------------------------------------------------------------------------------------------------------------------------------------------------------------------------------------------|
| 471.30 – 477.23 | [M+H] <sup>+</sup><br>Multiple isotopes                                                                                                                                                  |
| 436.22-440.24   | 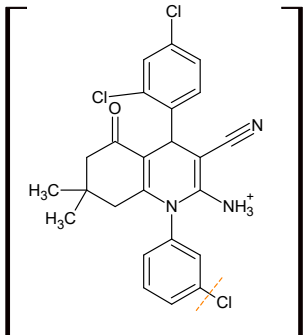 $\longrightarrow$  |
| 326.20 – 328.22 |  $\longrightarrow$  |



1.12. Product 5l: 2-amino-4-(2,4-dichlorophenyl)-7,8-dimethyl-1-(3-nitrophenyl)-5-oxo-1,4,5,6,7,8-hexahydroquinoline-3-carbonitrile

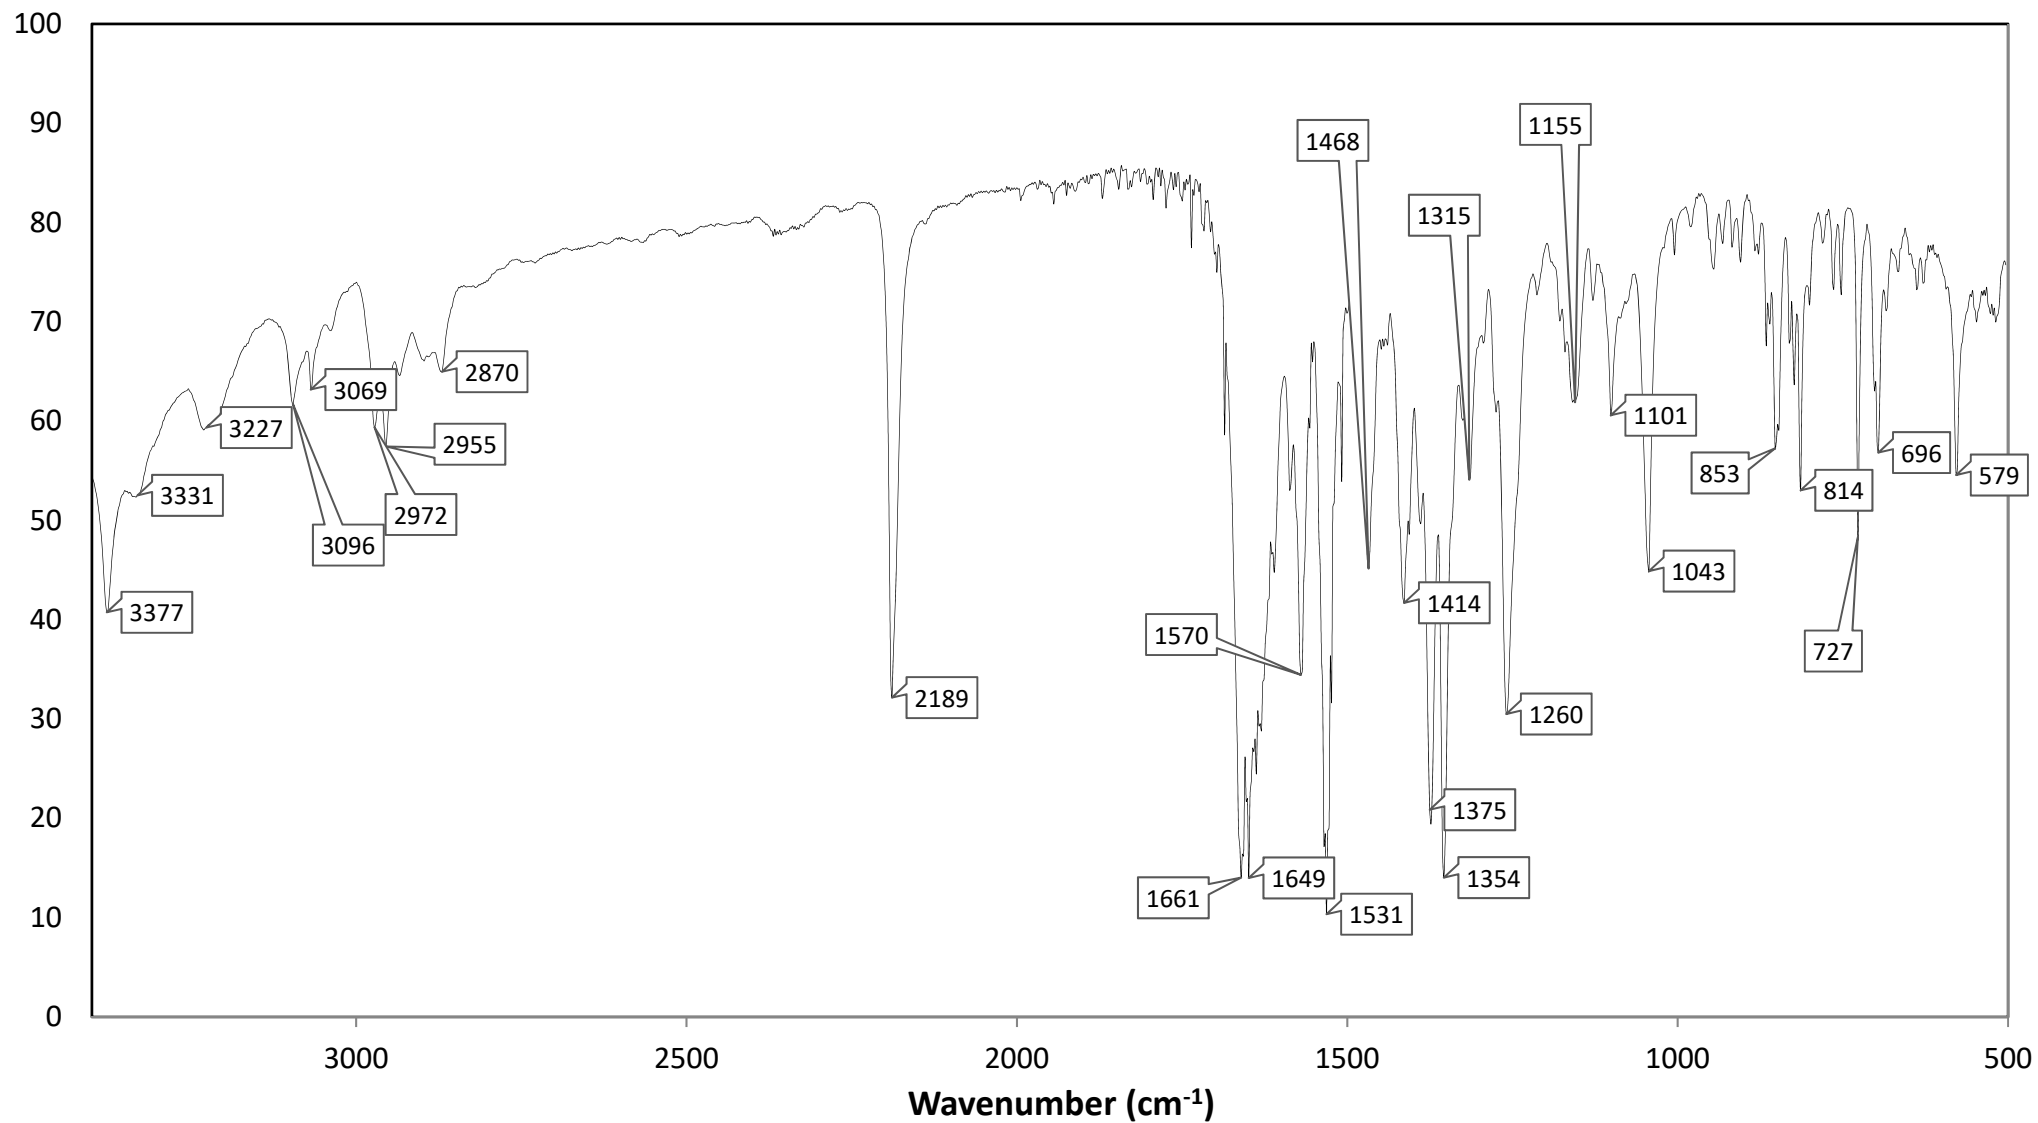

Figure S41 - IR spectrum of 5l

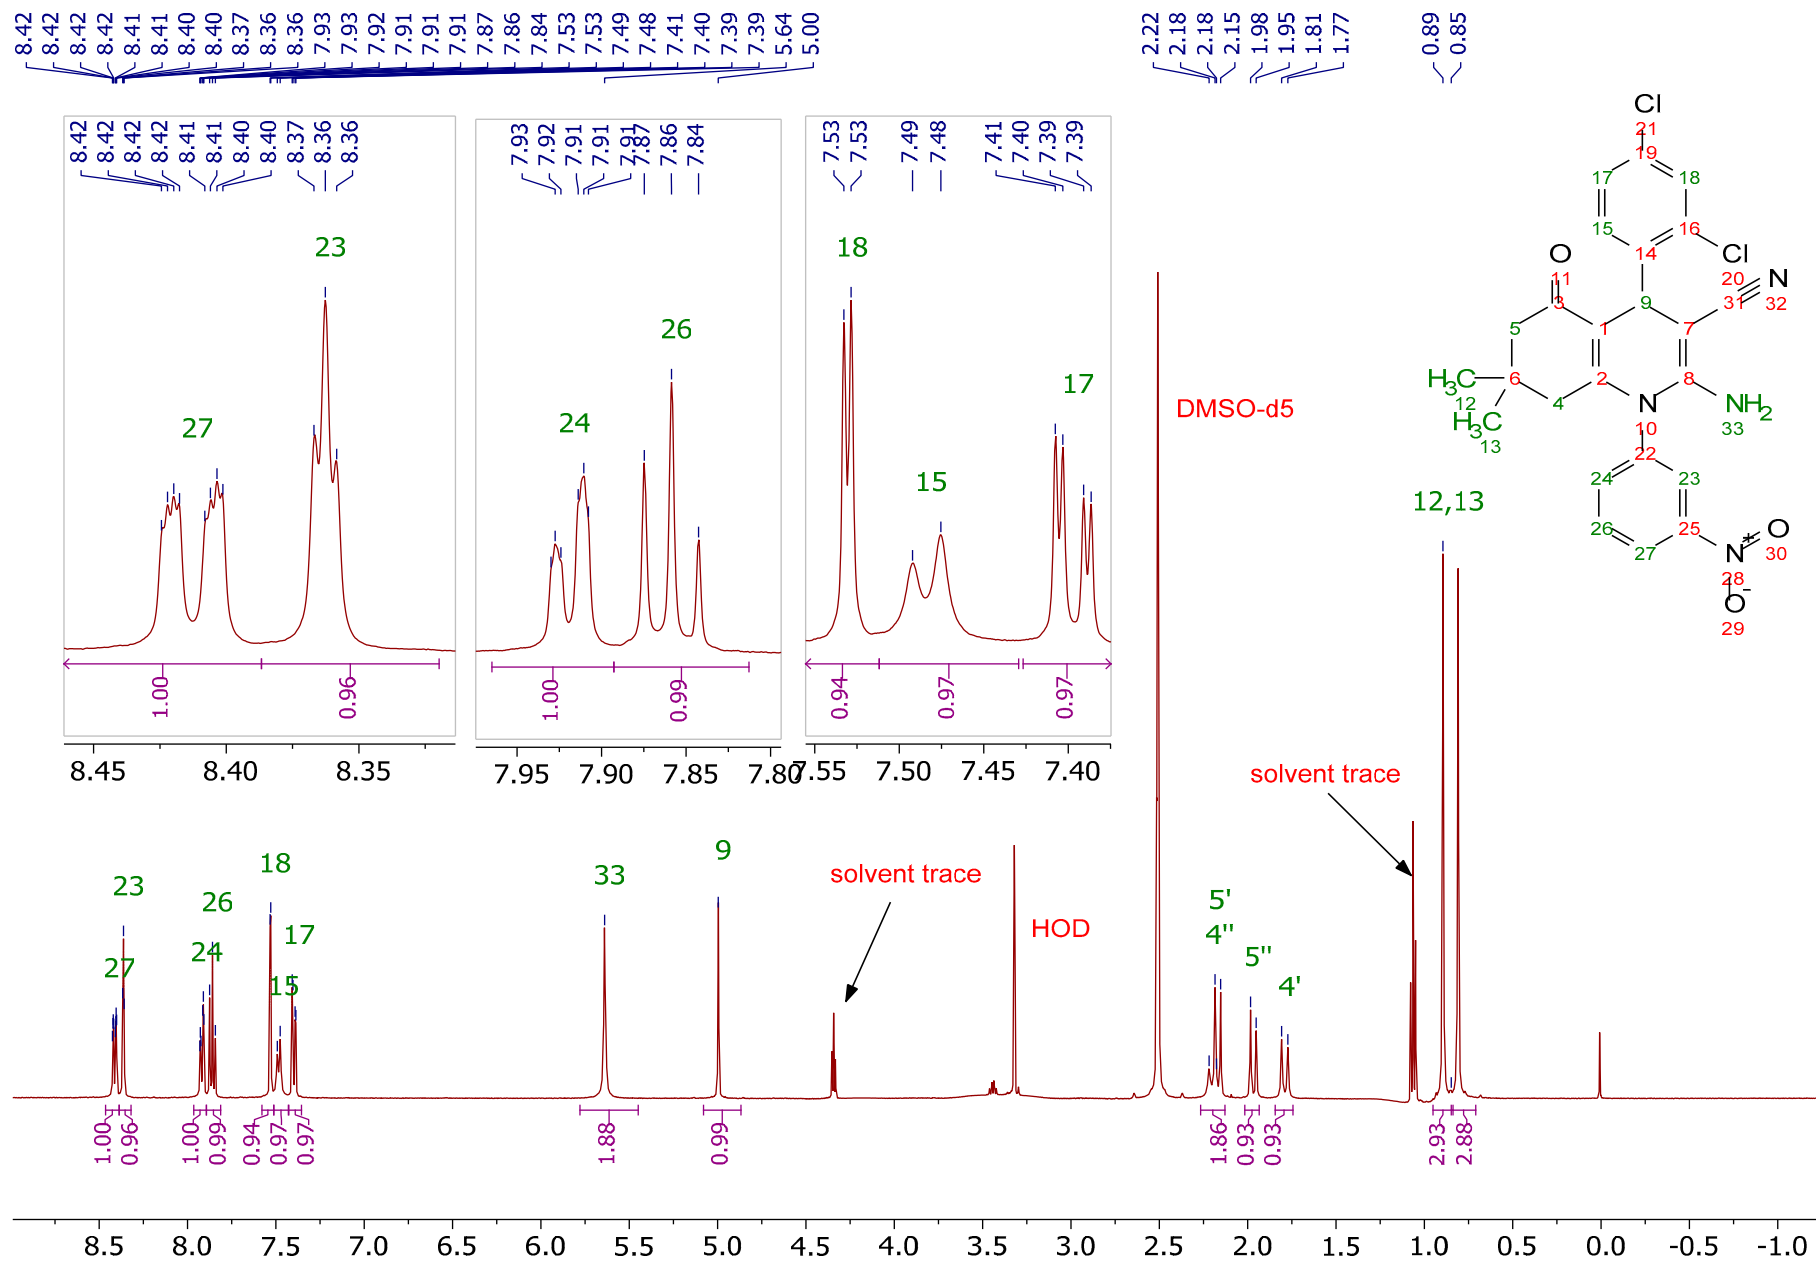

Figure S42 - <sup>1</sup>H NMR spectrum of 5l



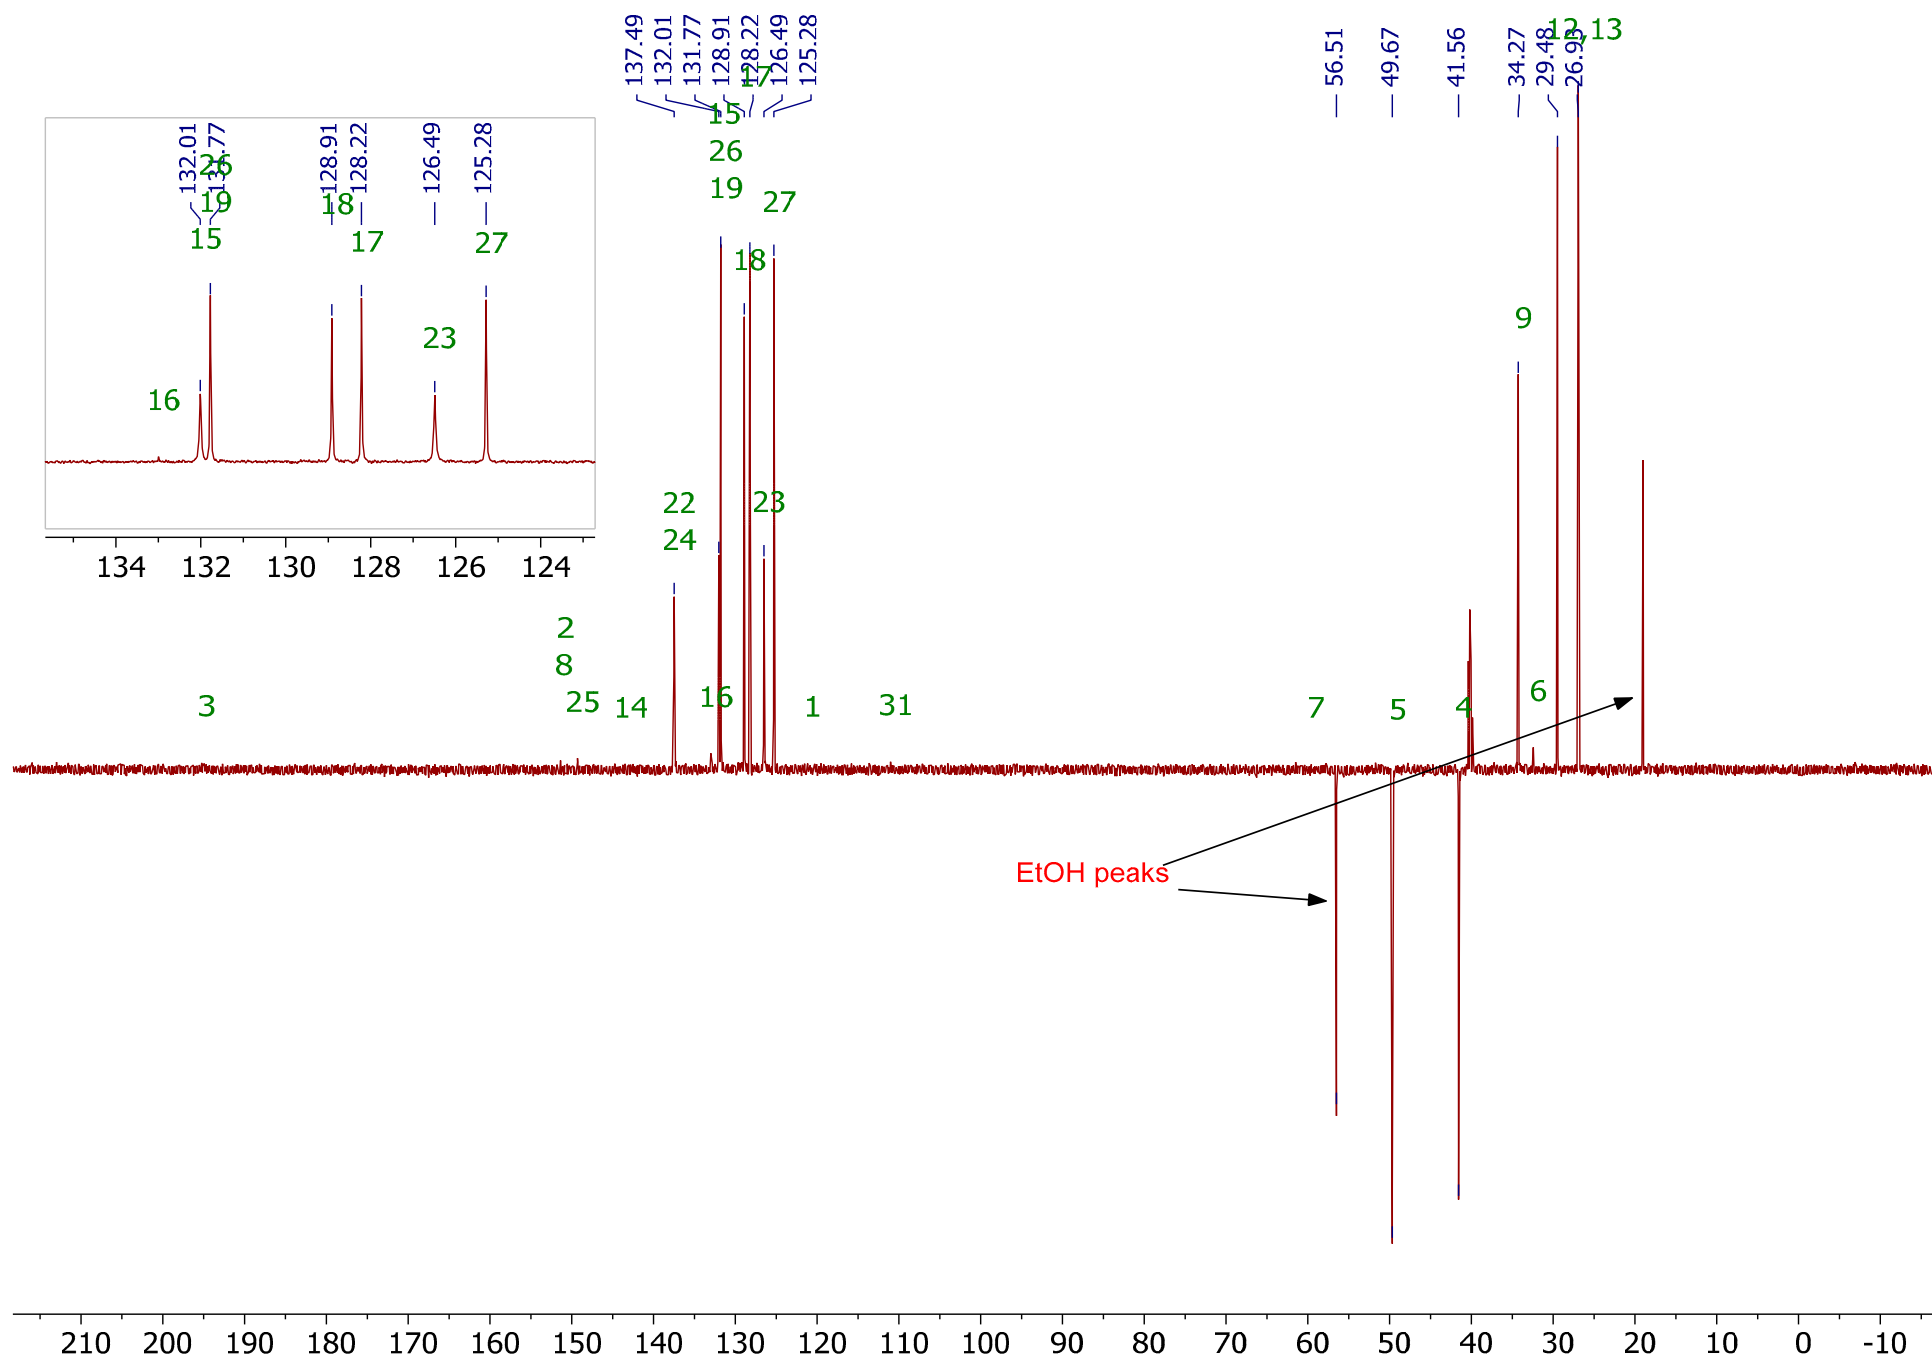

Figure S44 - DEPT spectrum of 5l

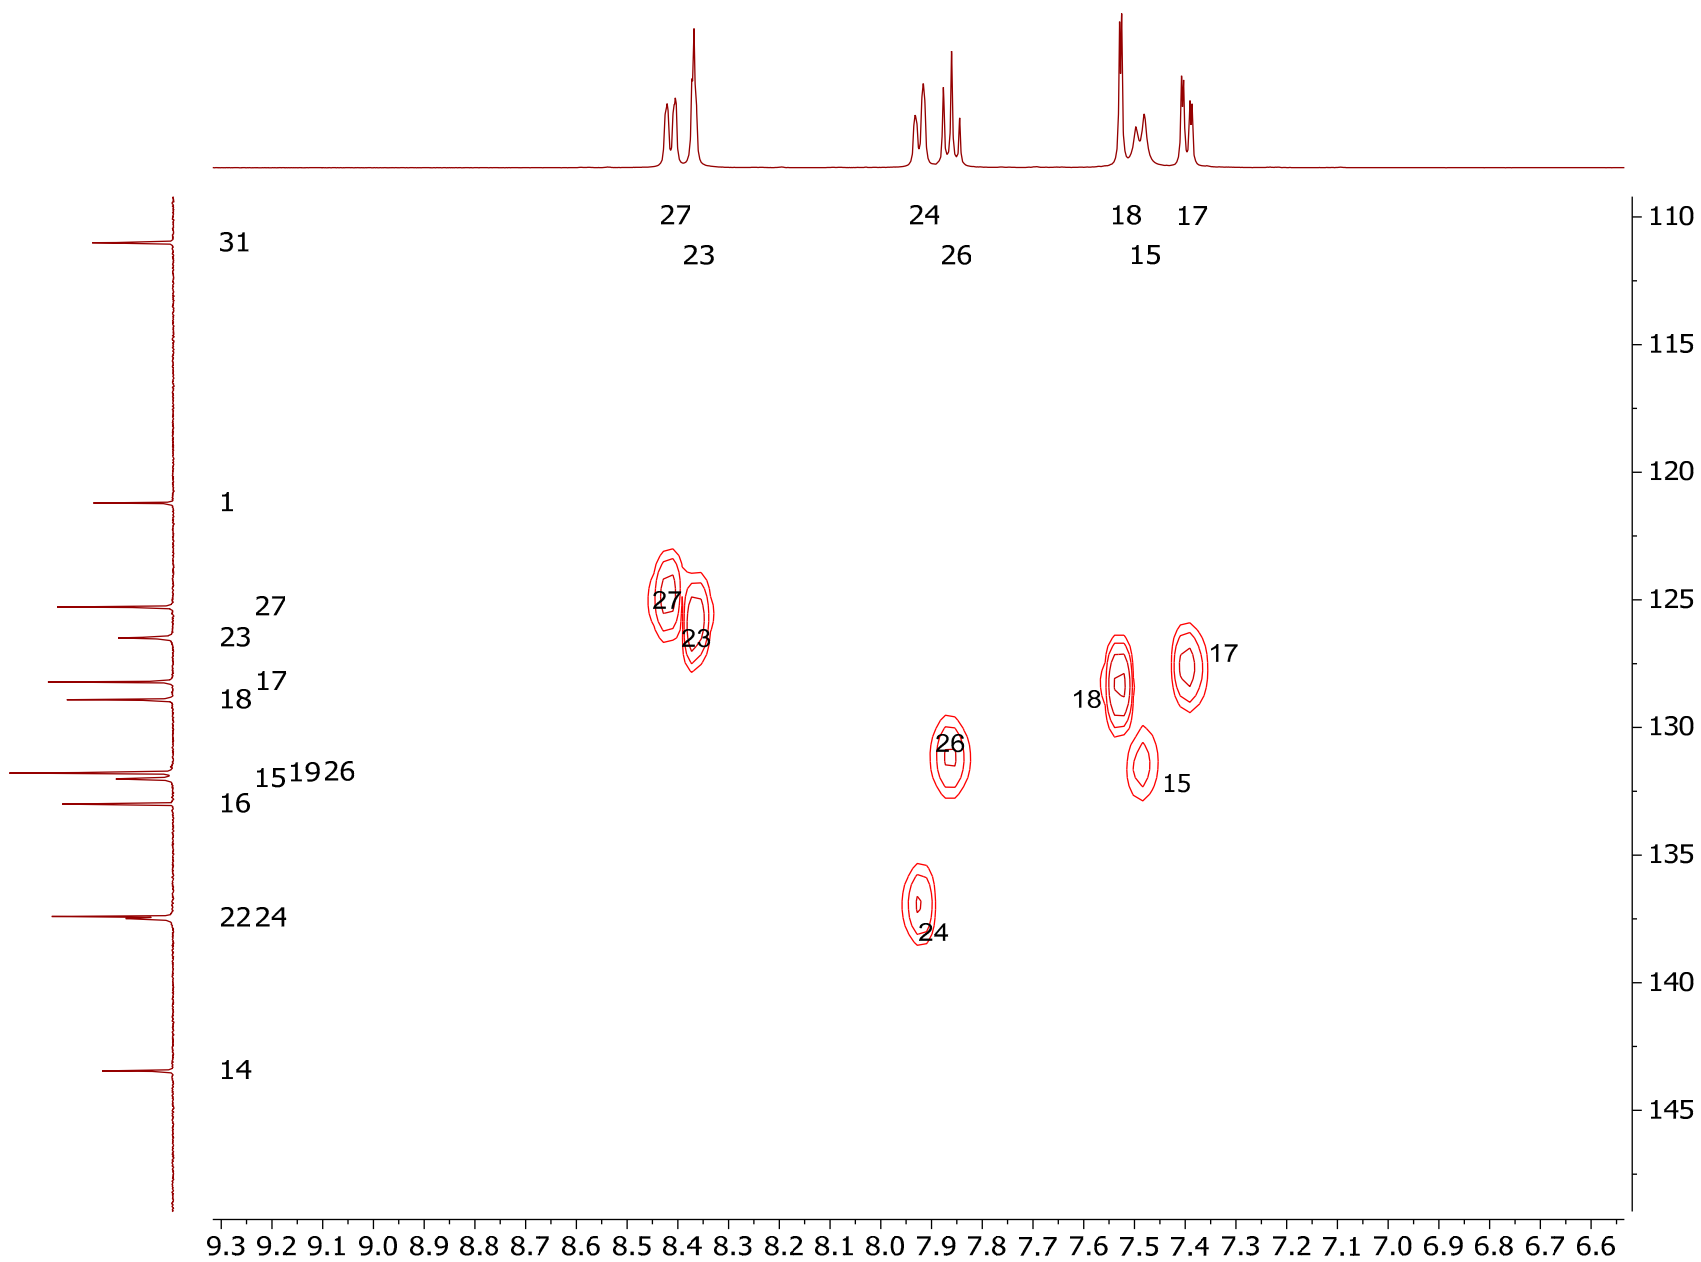

Figure S45 - HSQC spectrum of 5l



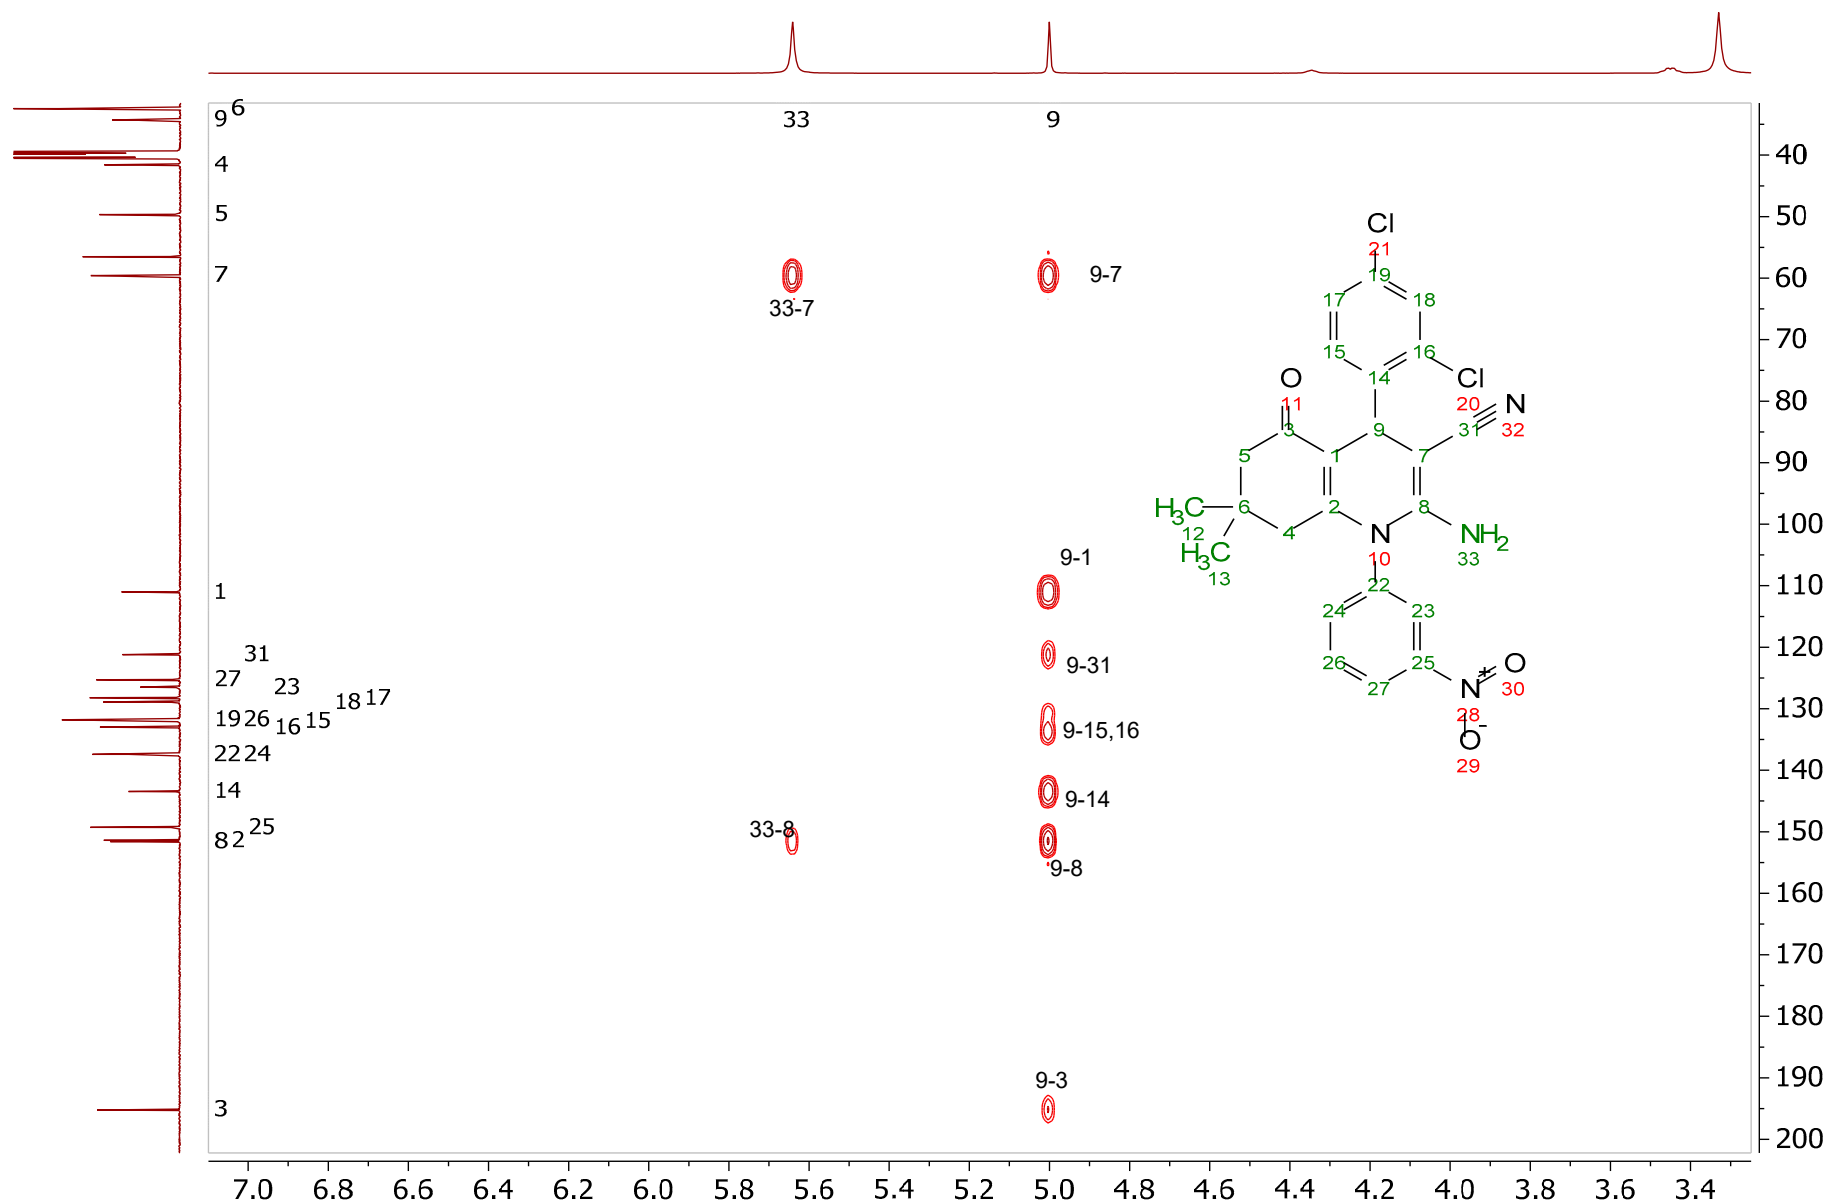

Figure S47 - Upfield region of HMBC spectrum of 5l

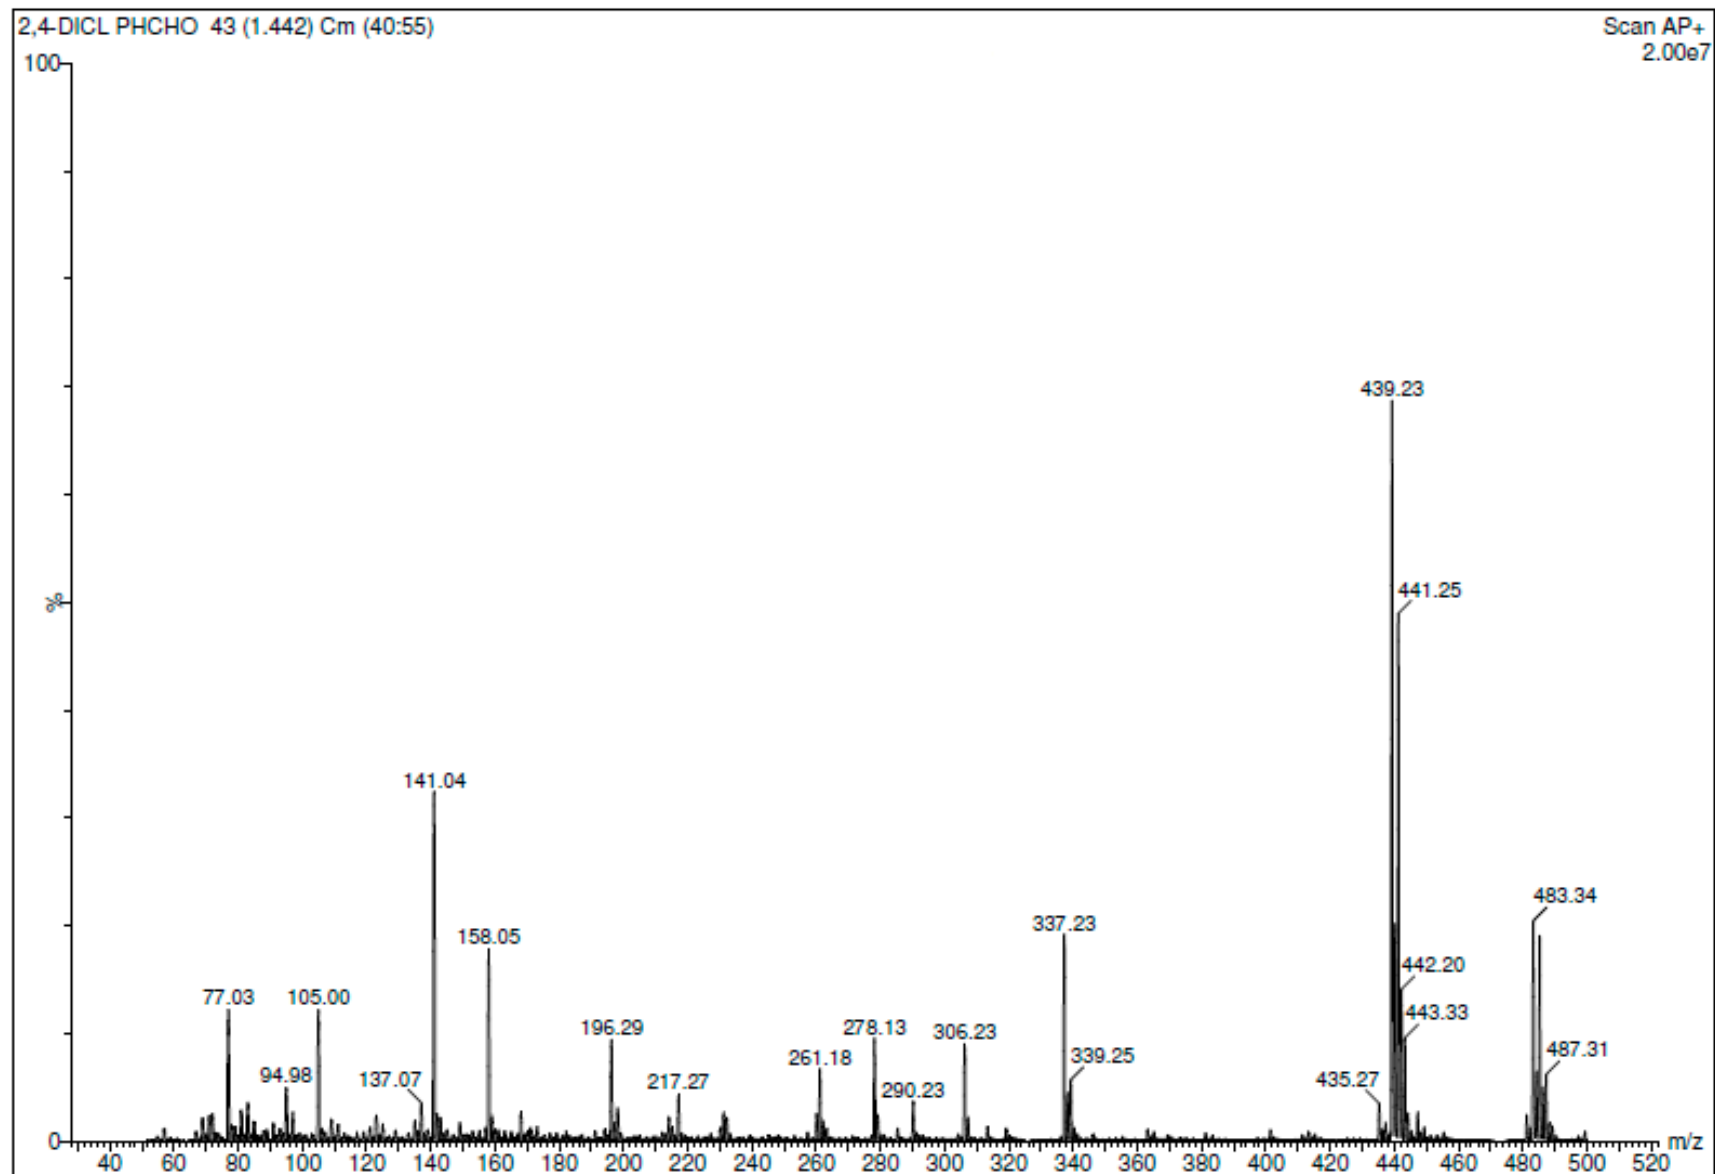

Figure S48 - MS spectrum of 5l



Table S5 – Peaks and fragmentation positions for 5l

| <b>m/z</b>           | <b>Fragmentation position and structure</b>                                          |
|----------------------|--------------------------------------------------------------------------------------|
| <b>483.34-487.31</b> | <p style="text-align: center;"><math>[M+H]^+</math><br/>Multiple isotopes</p>        |
| <b>439.23</b>        | 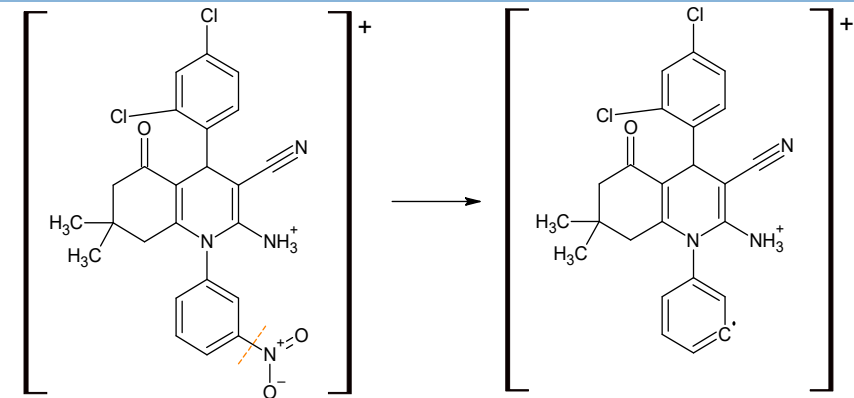   |
| <b>337.23</b>        |   |
| <b>158.05</b>        |  |

1.13. Product 5m: 2-amino-1-(4-methoxyphenyl)-7,8-dimethyl-4-(3-methylphenyl)-5-oxo-1,4,5,6,7,8-hexahydroquinoline-3-carbonitrile

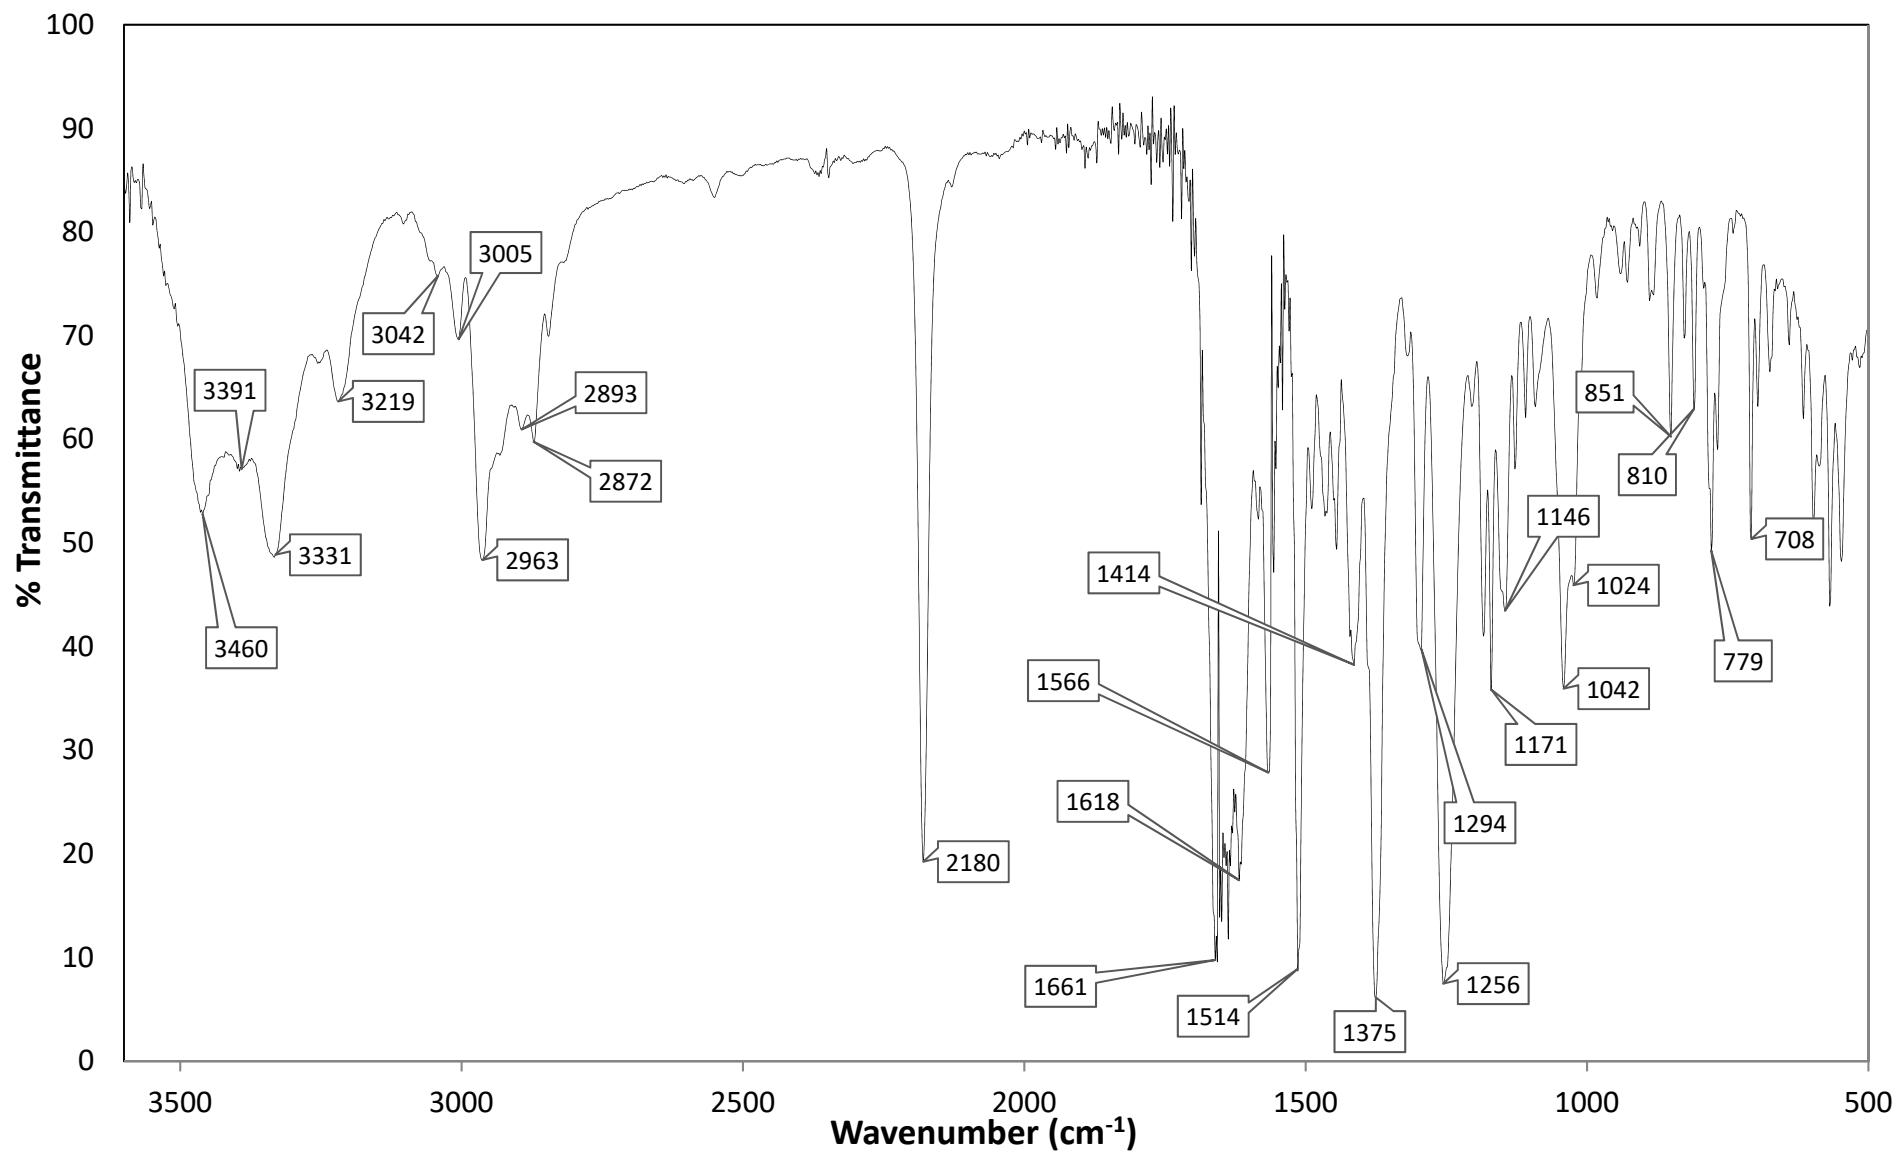

Figure S49 - IR spectrum of 5m

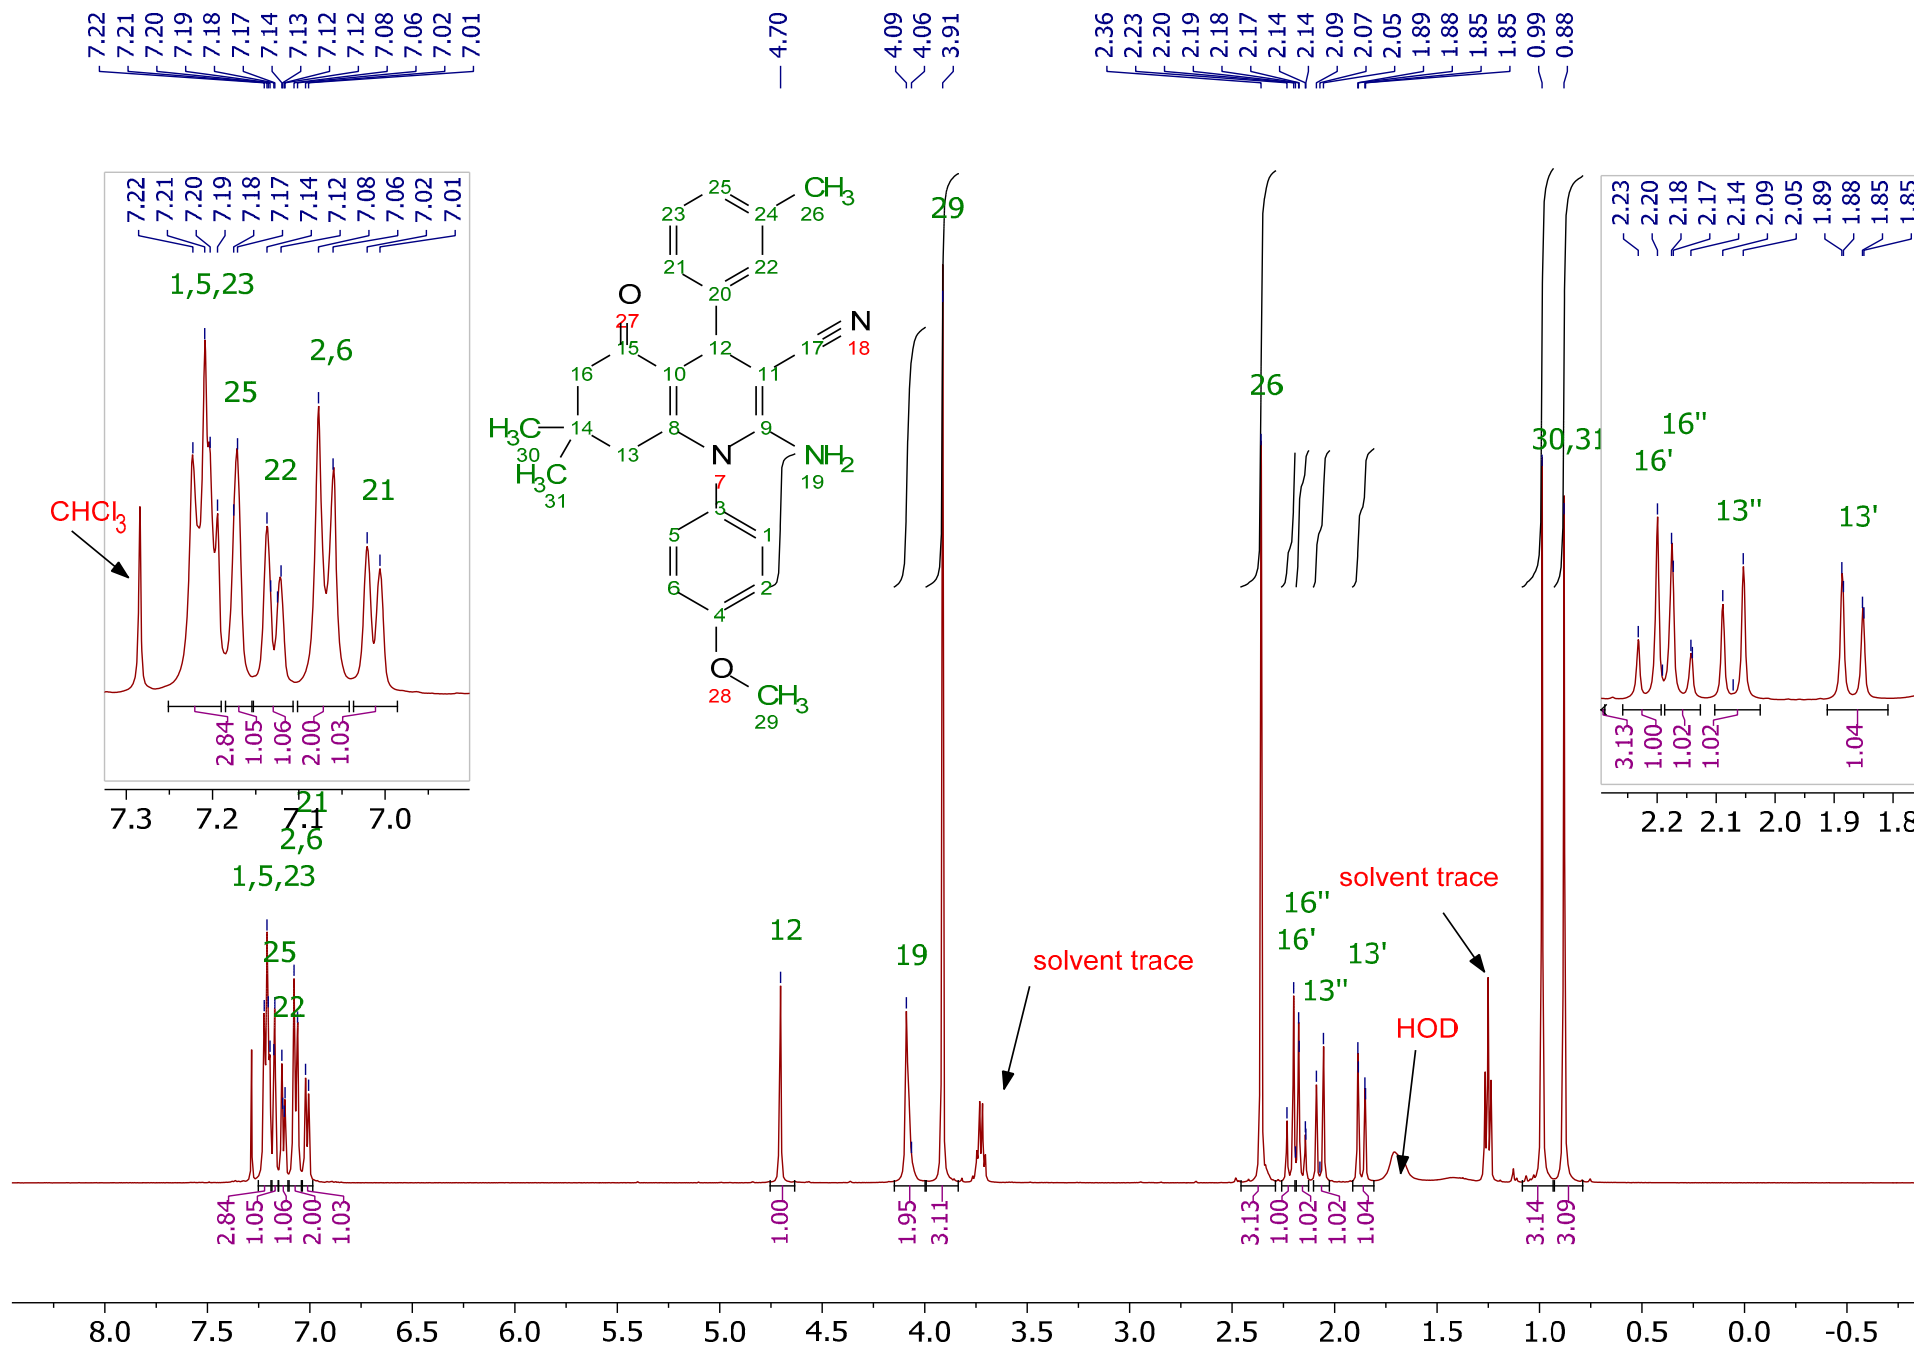

Figure S50 - <sup>1</sup>H NMR spectrum of 5m

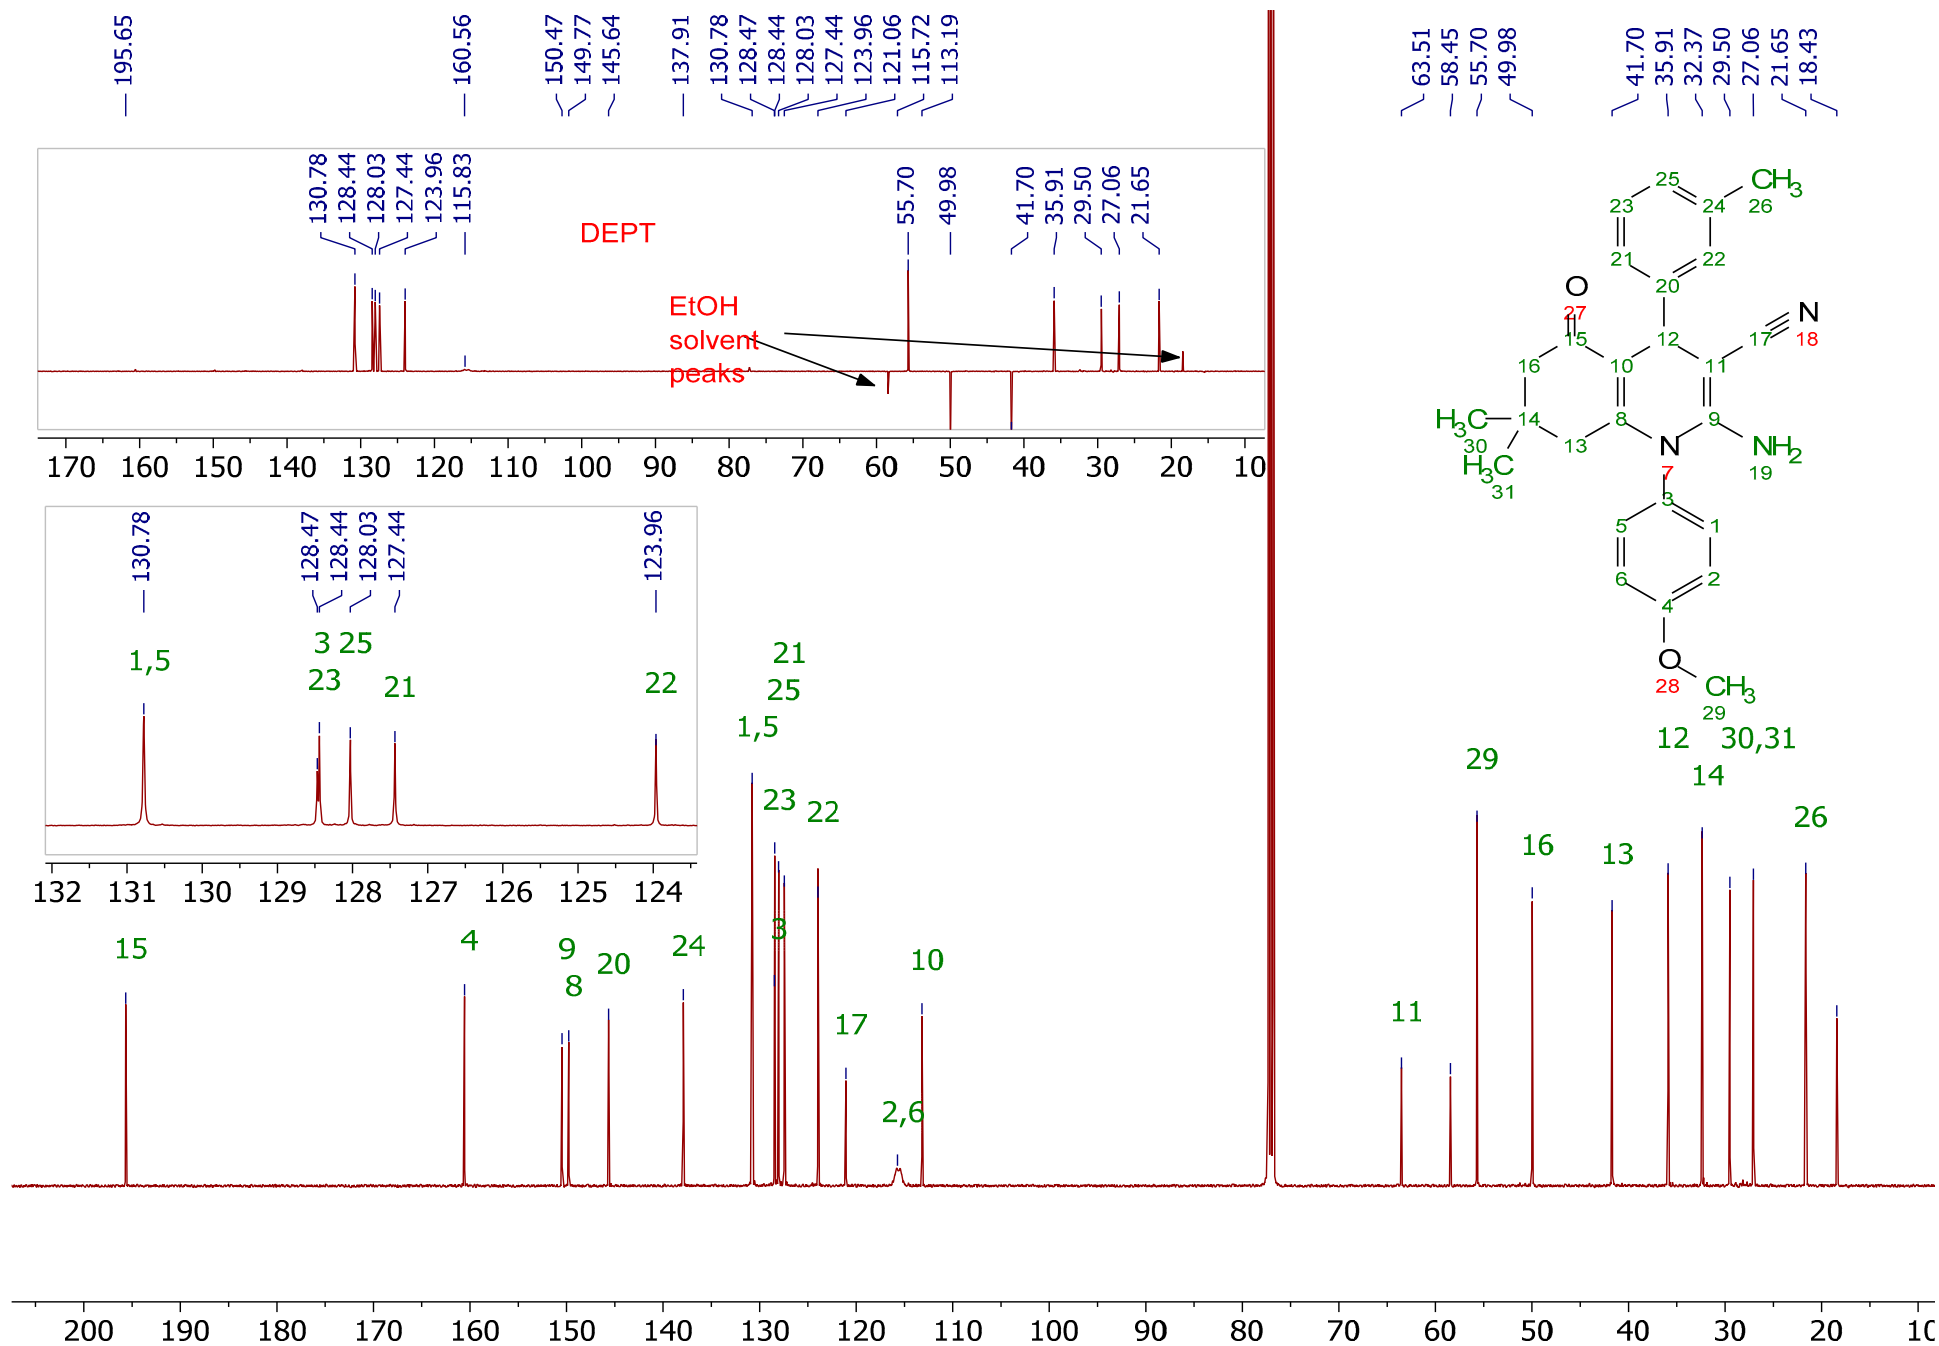

Figure S51 - <sup>13</sup>C NMR spectrum of 5m with inset expansion of DEPT spectrum

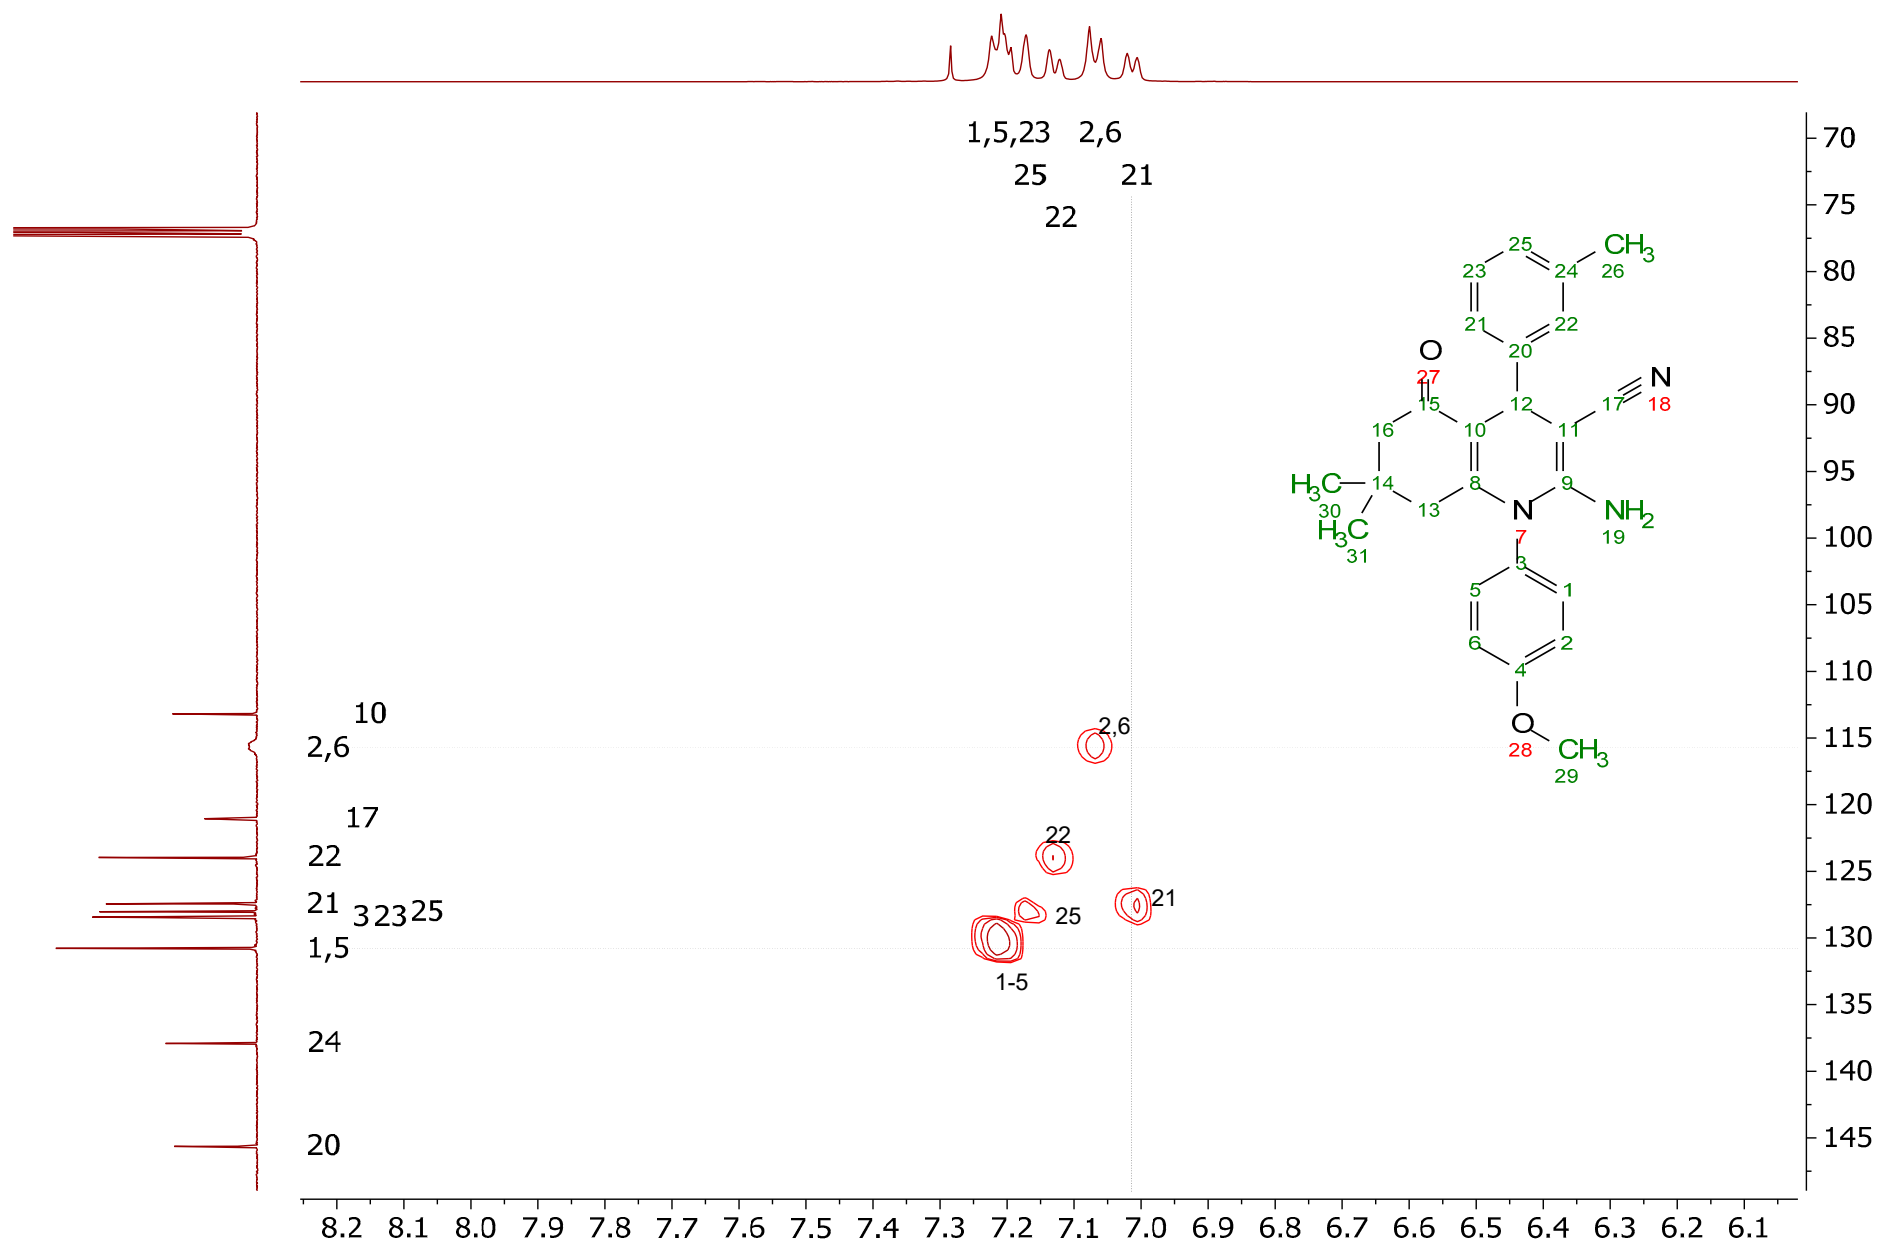

Figure S52 – Downfield region of HSQC NMR spectrum of 5m

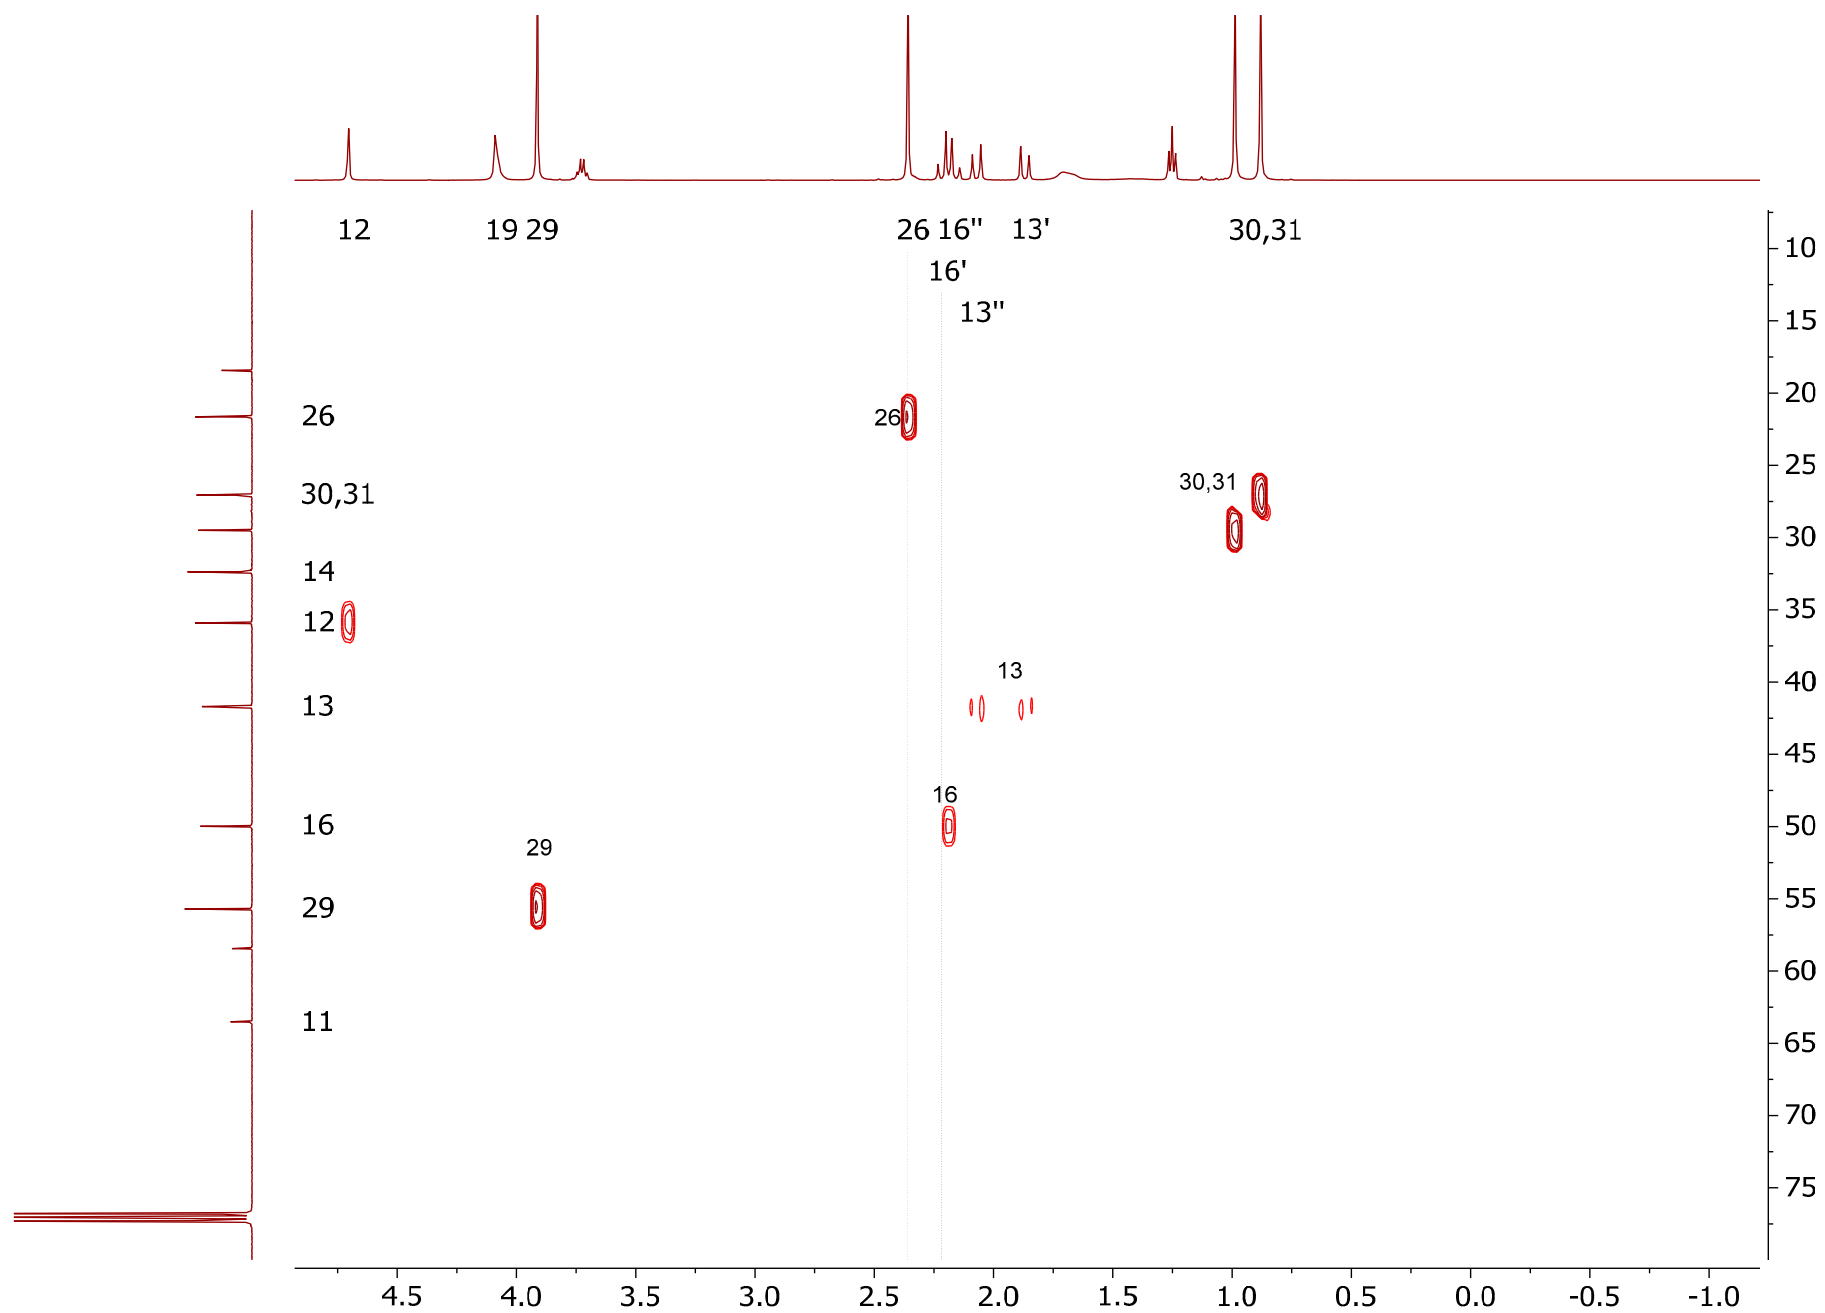

Figure S53 - Upfield region of HSQC spectrum of 5m

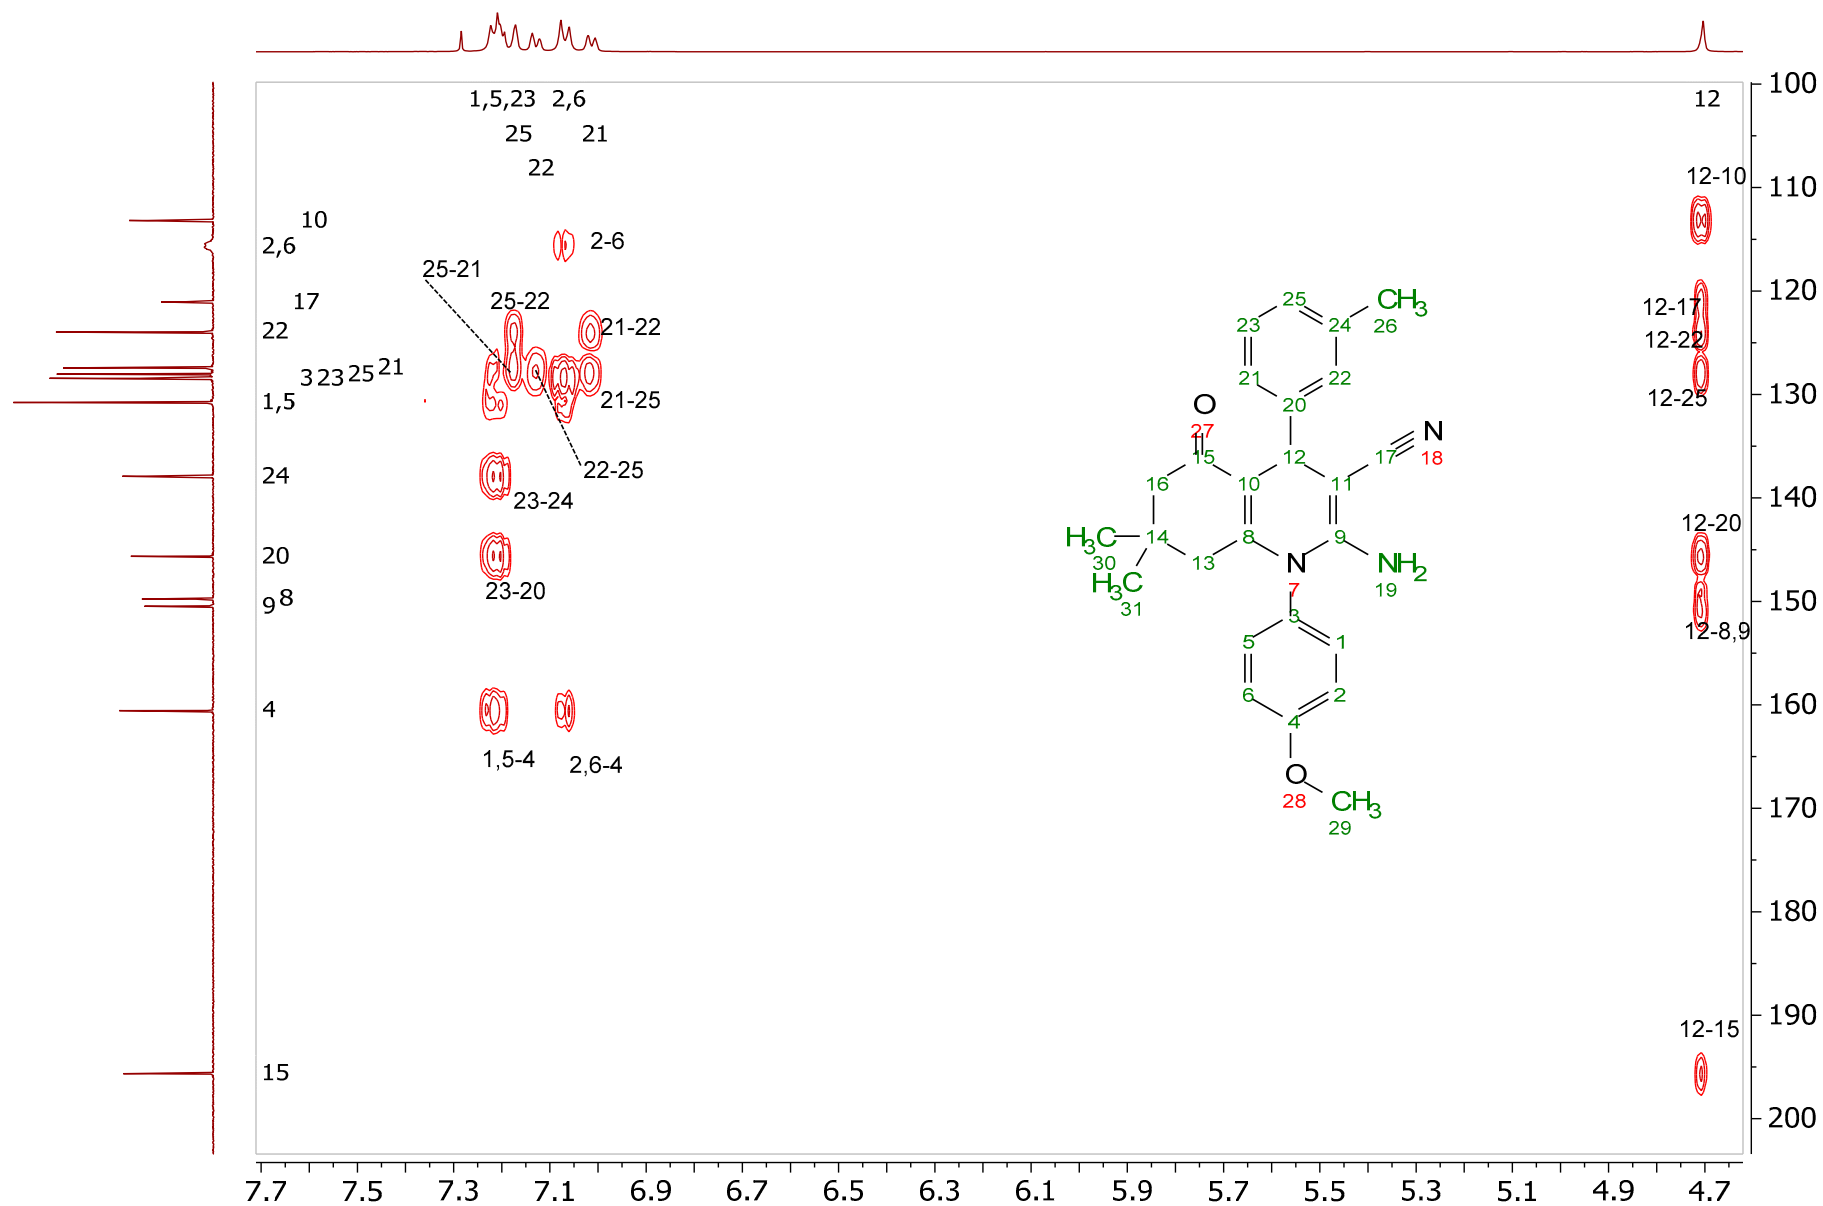

Figure S54 - Downfield region of HMBC NMR spectrum of 5m

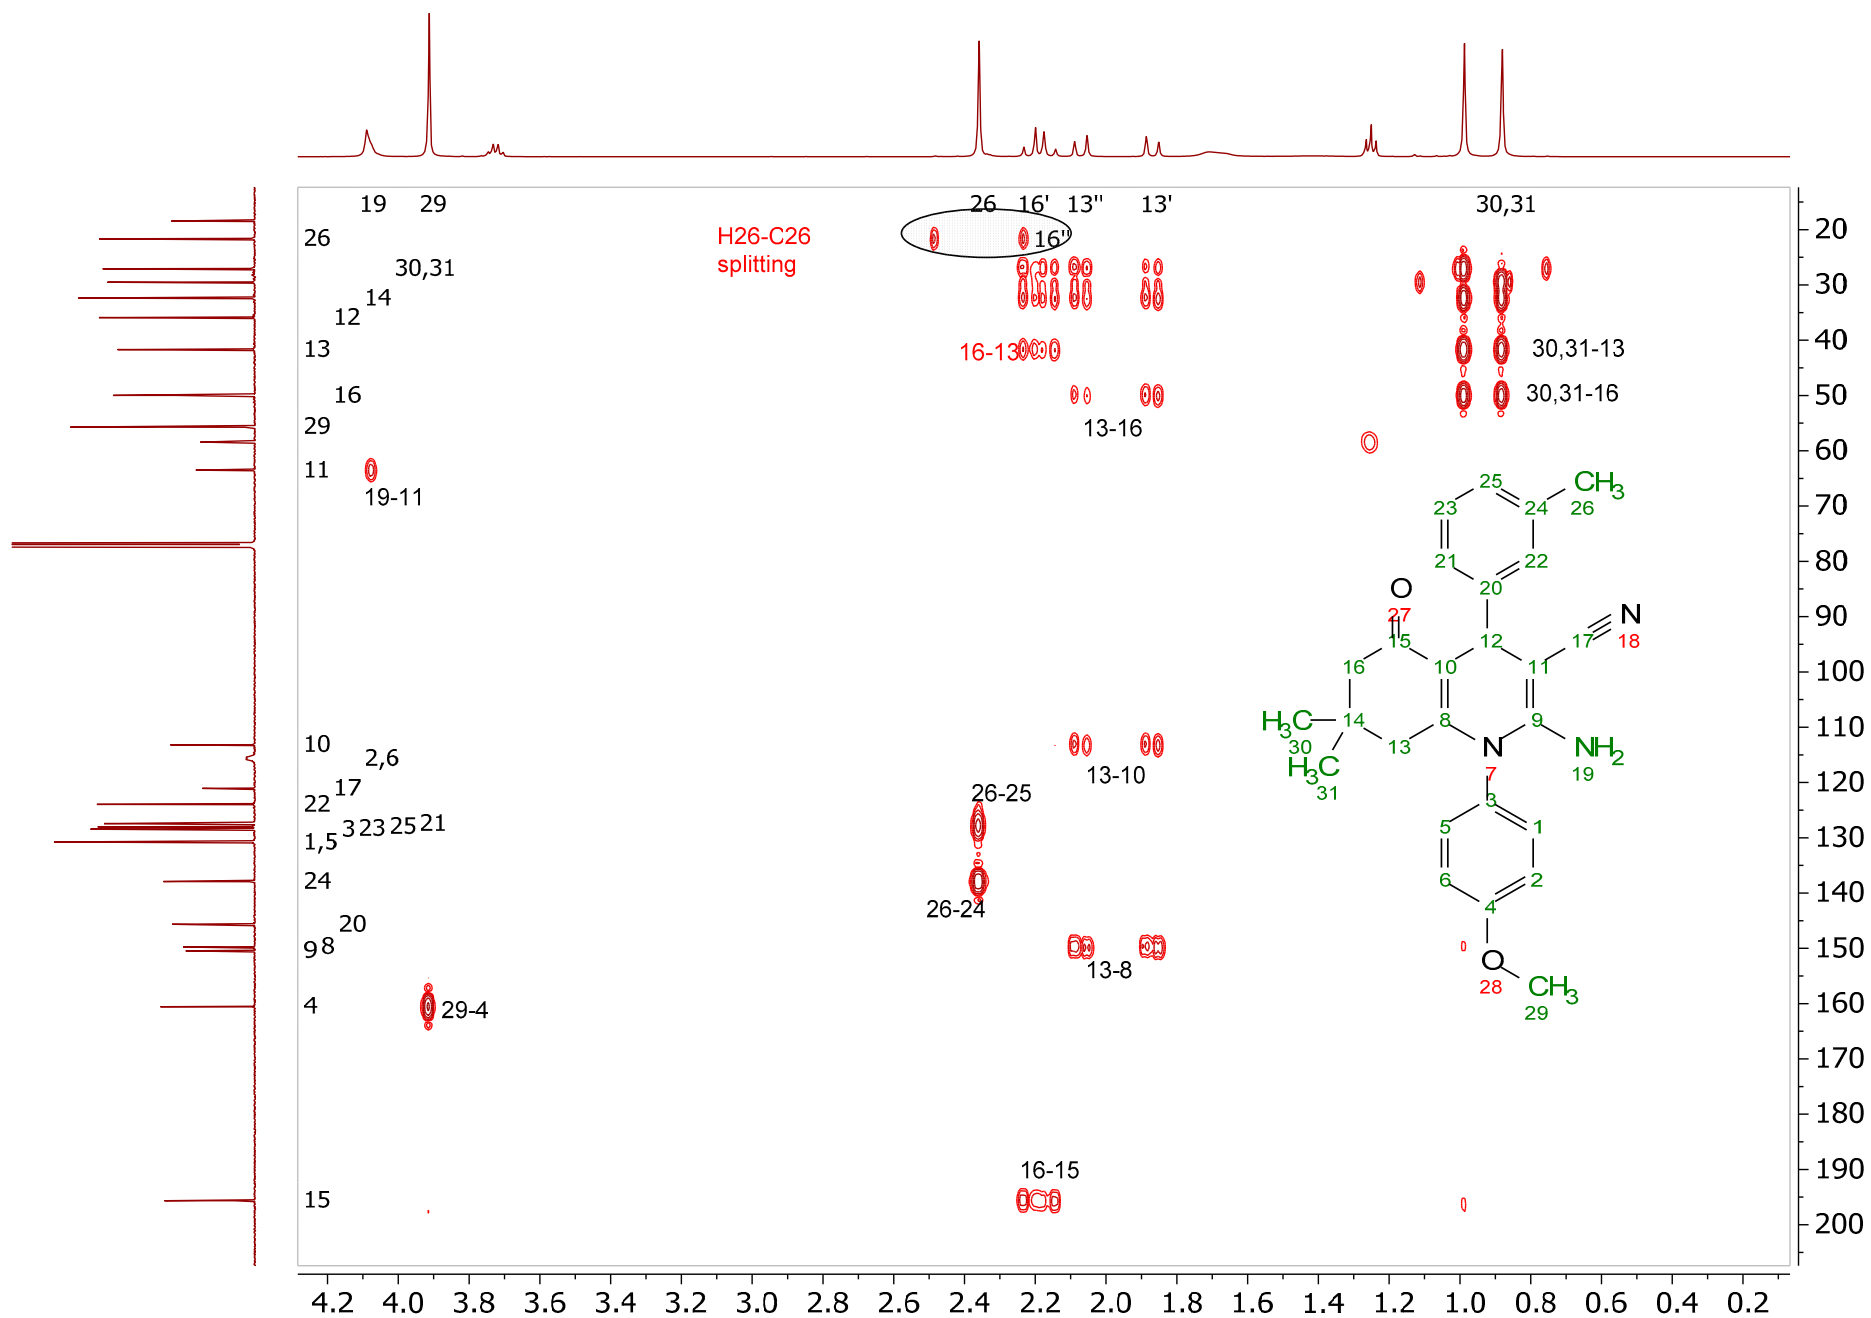

Figure S55 - Upfield region of HMBC NMR spectrum of 5m



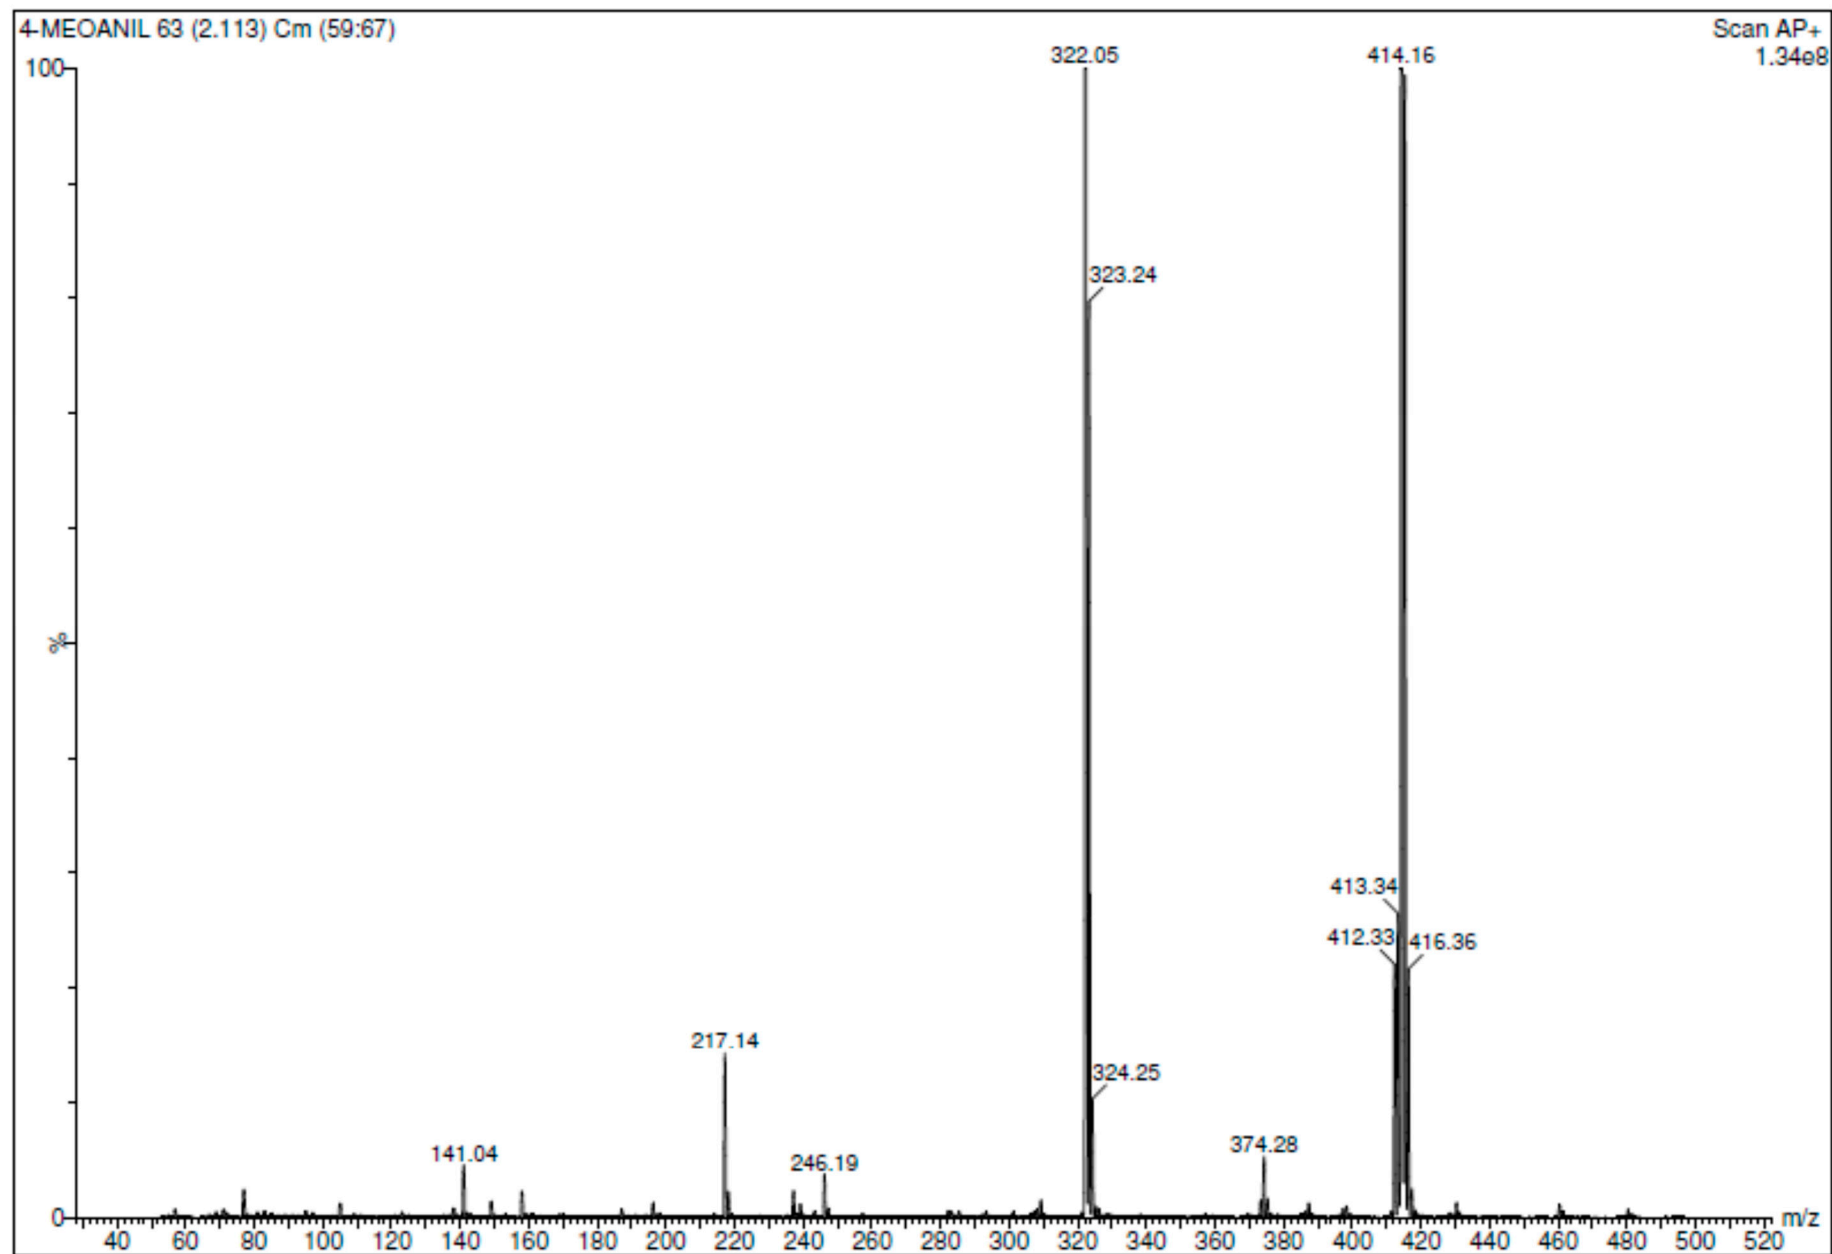

Figure S56 - MS spectrum of 5m

Table S6 - Fragmentation positions for peaks in MS spectrum of 29m

| <u>m/z</u>    | <u>Fragmentation position and structure</u>                                         |
|---------------|-------------------------------------------------------------------------------------|
| <b>414.16</b> | 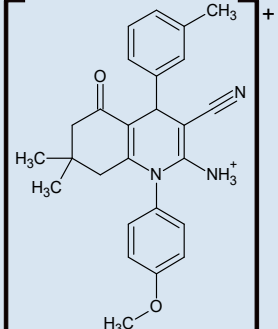 |
| <b>322.05</b> |   |
| <b>217.14</b> |  |

1.14. Product 5n: 2-amino-4-(2,4-dichlorophenyl)-7,8-dimethyl-1-(methylphenyl)-5-oxo-1,4,5,6,7,8-hexahydroquinoline-3-carbonitrile

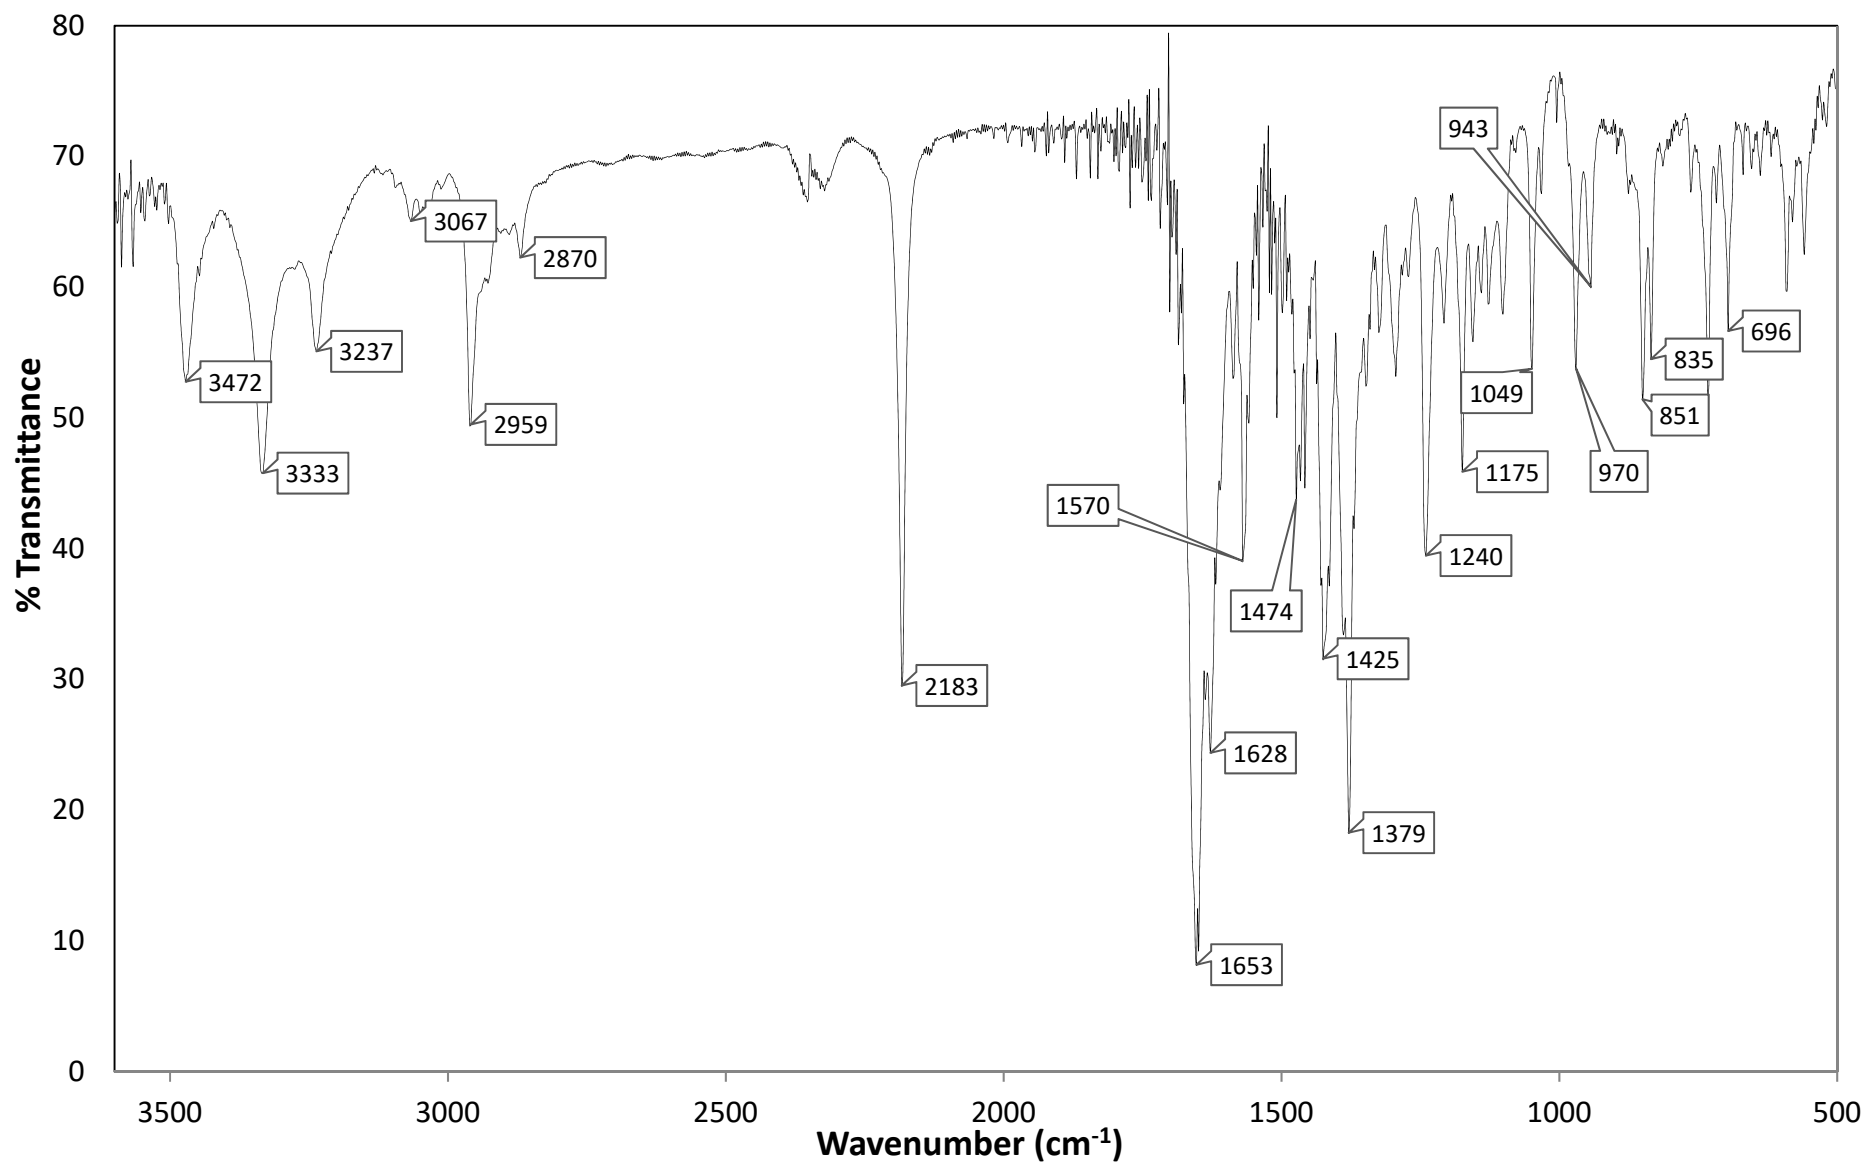

Figure S57 - IR spectrum of 5n

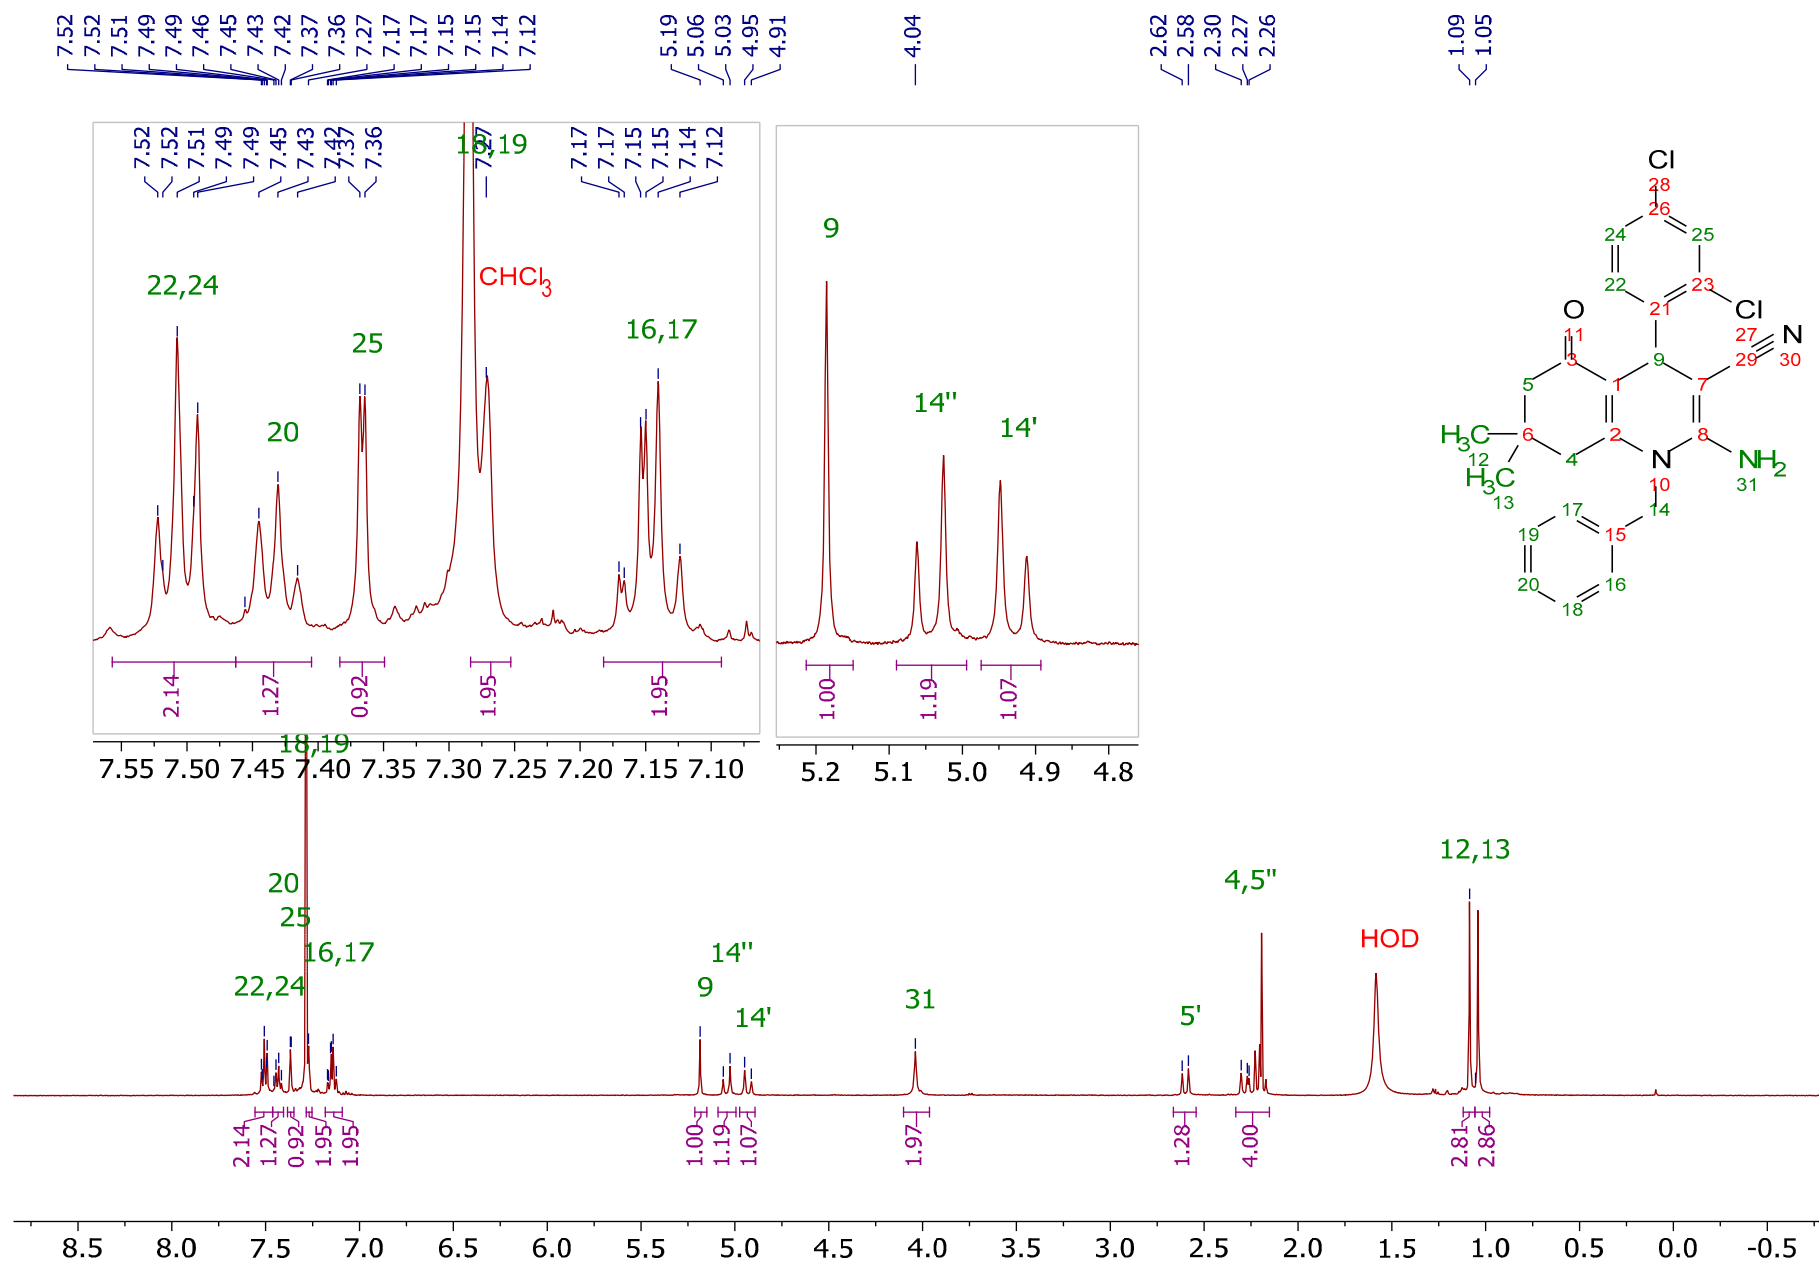

Figure S58 - <sup>1</sup>H NMR spectrum of 5n

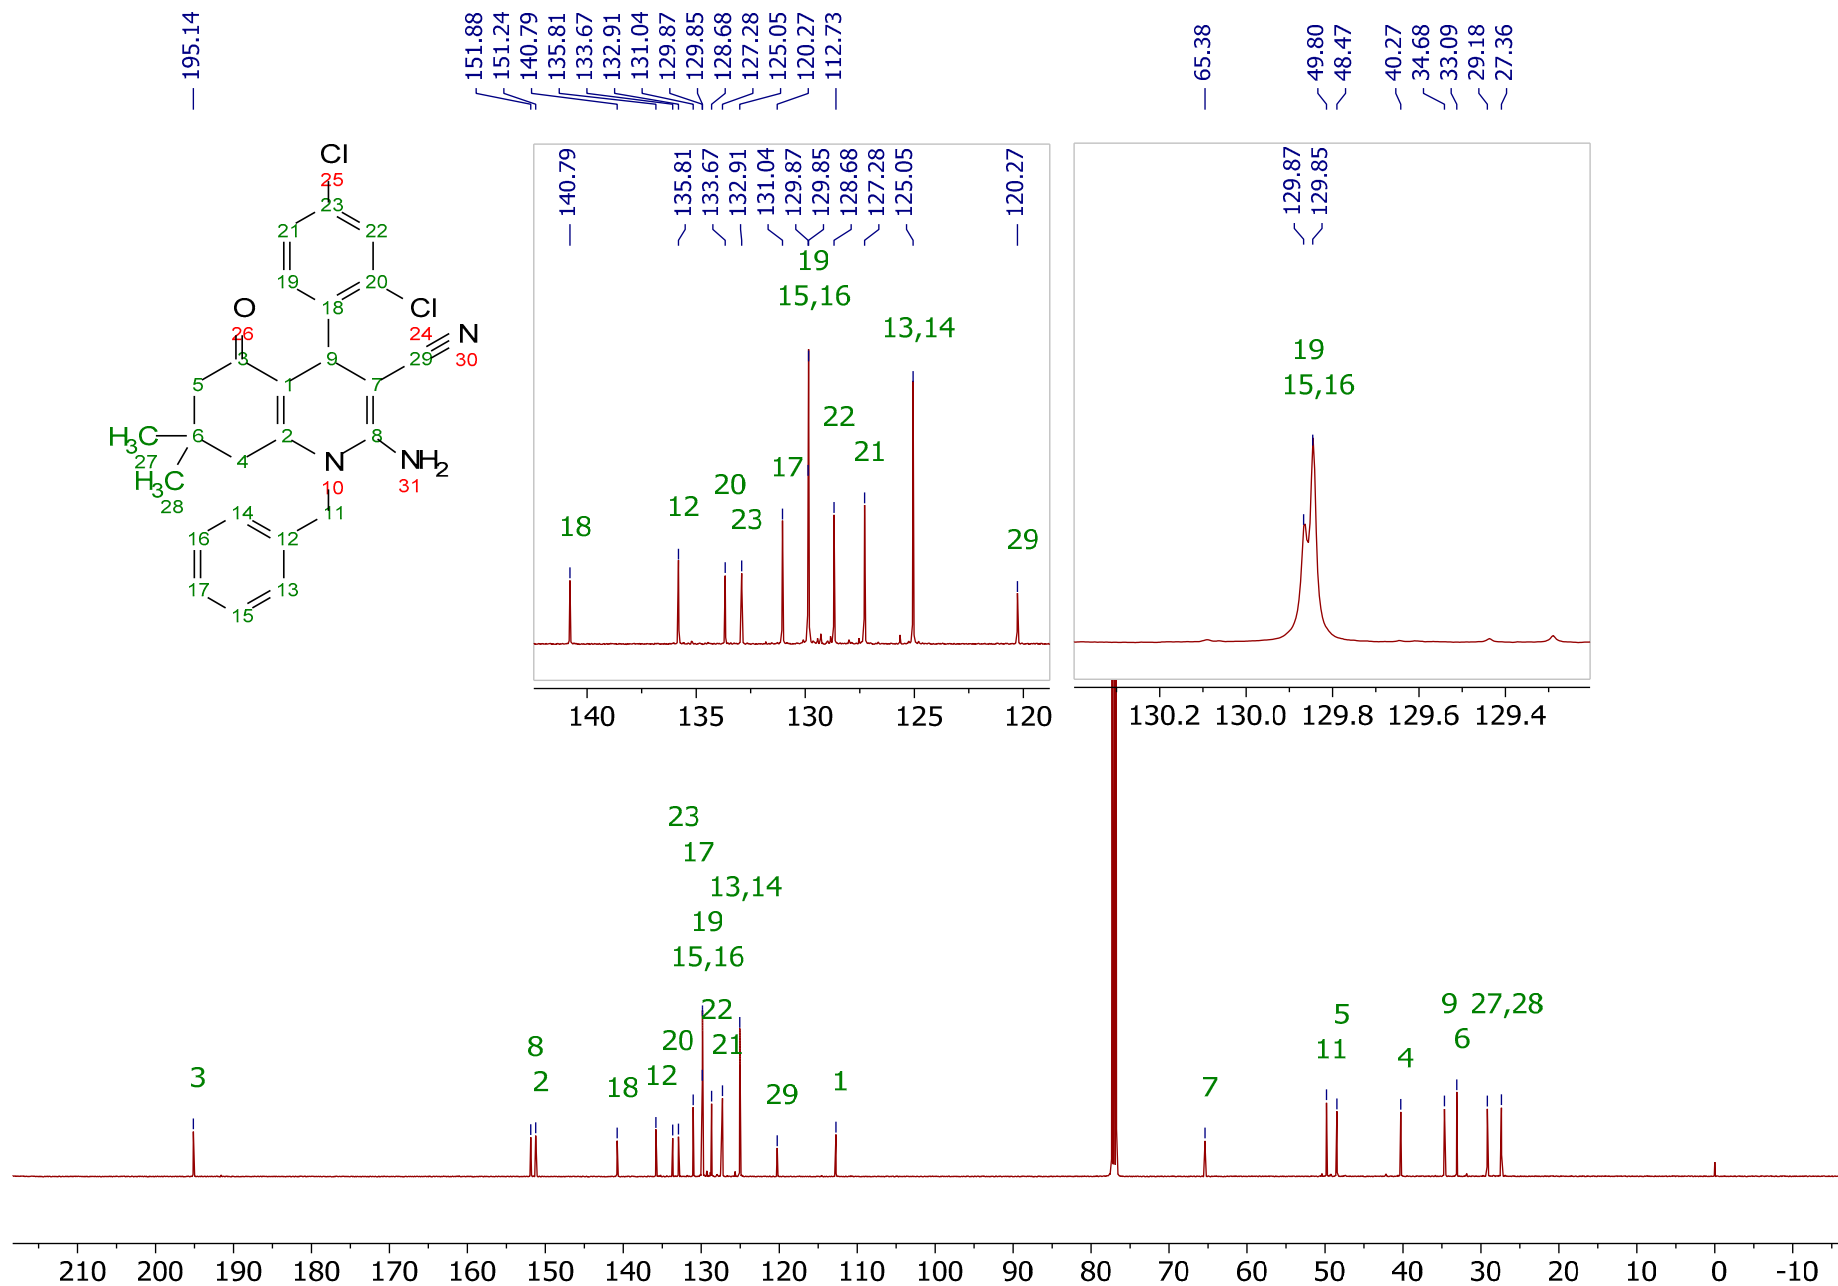

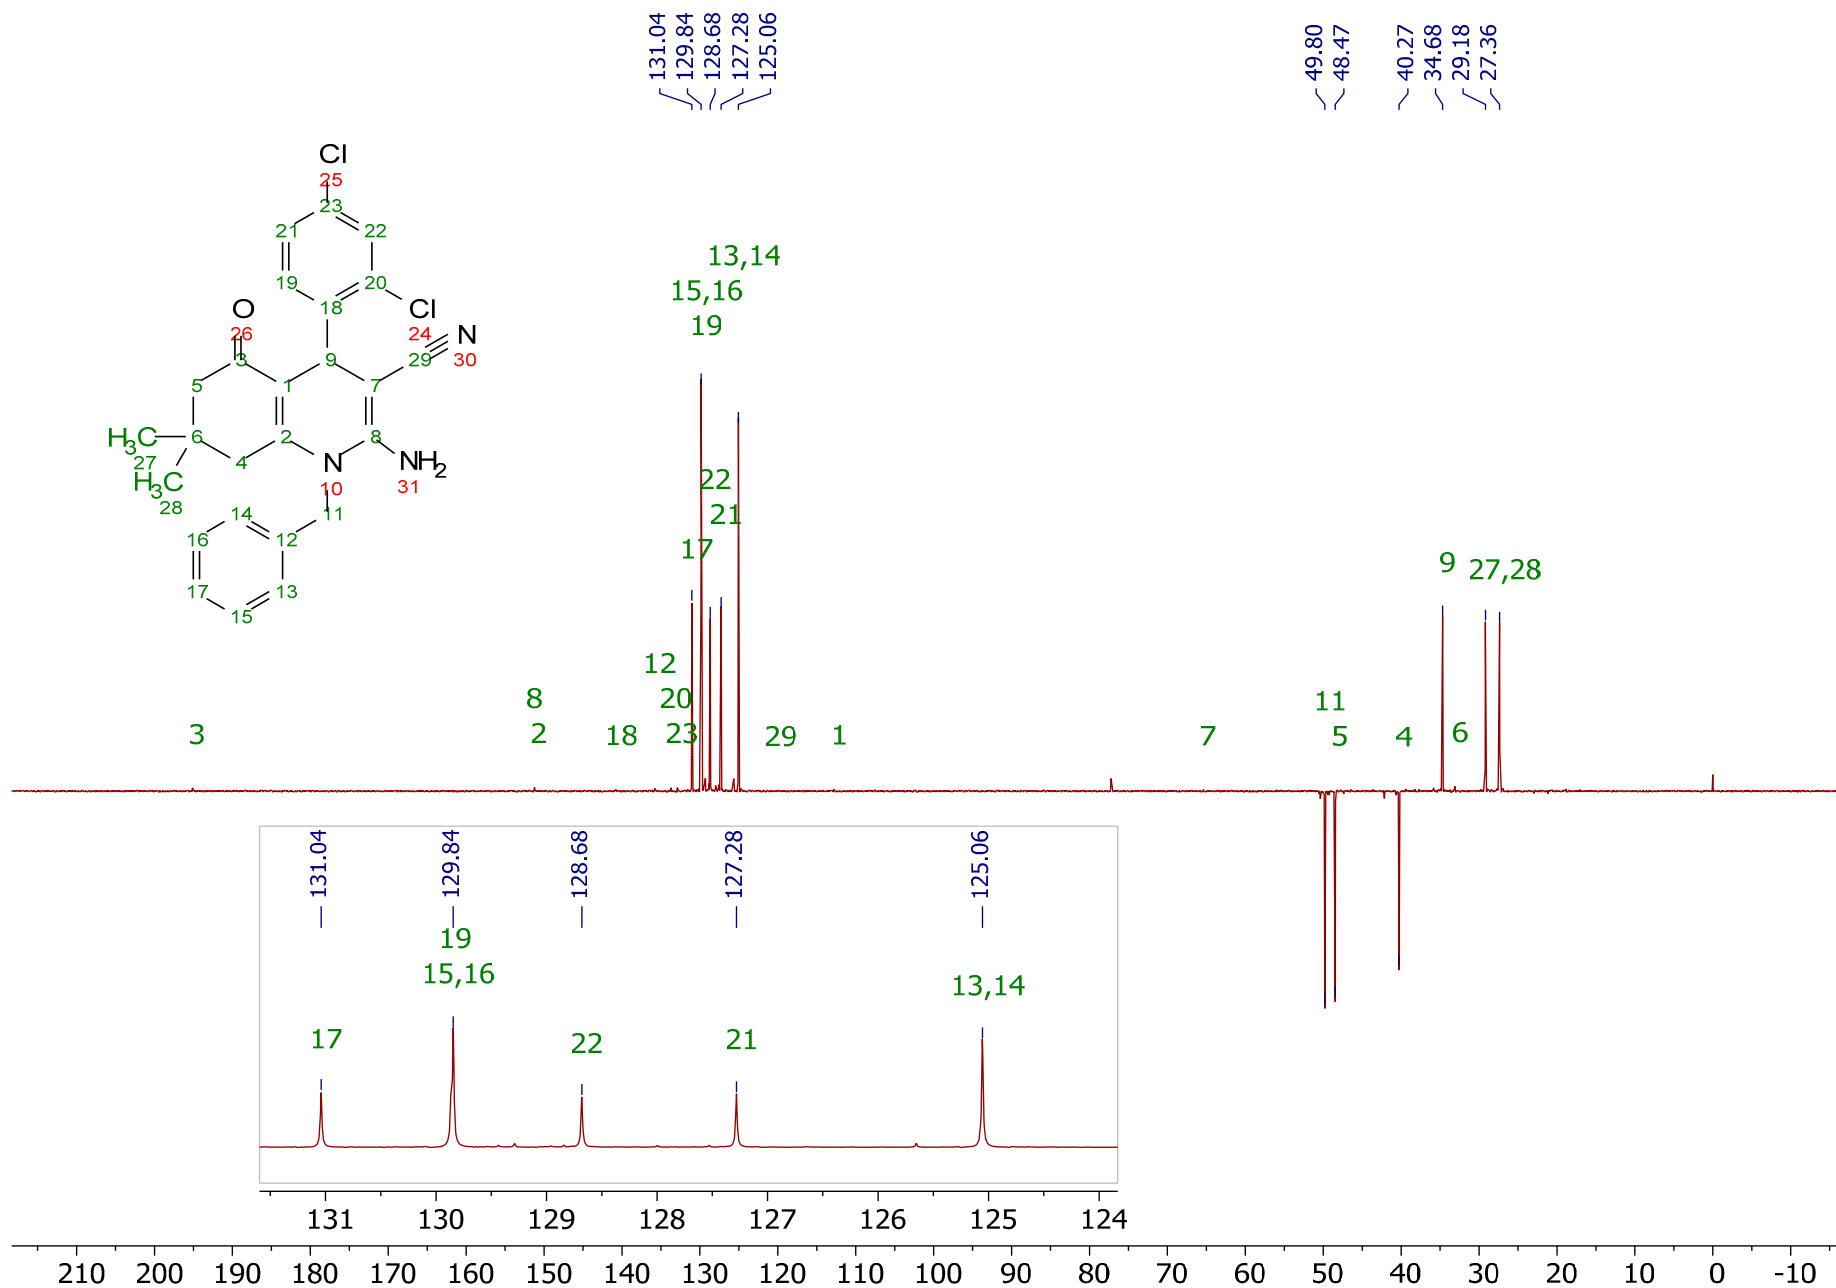

Figure S60 - DEPT spectrum of 5n

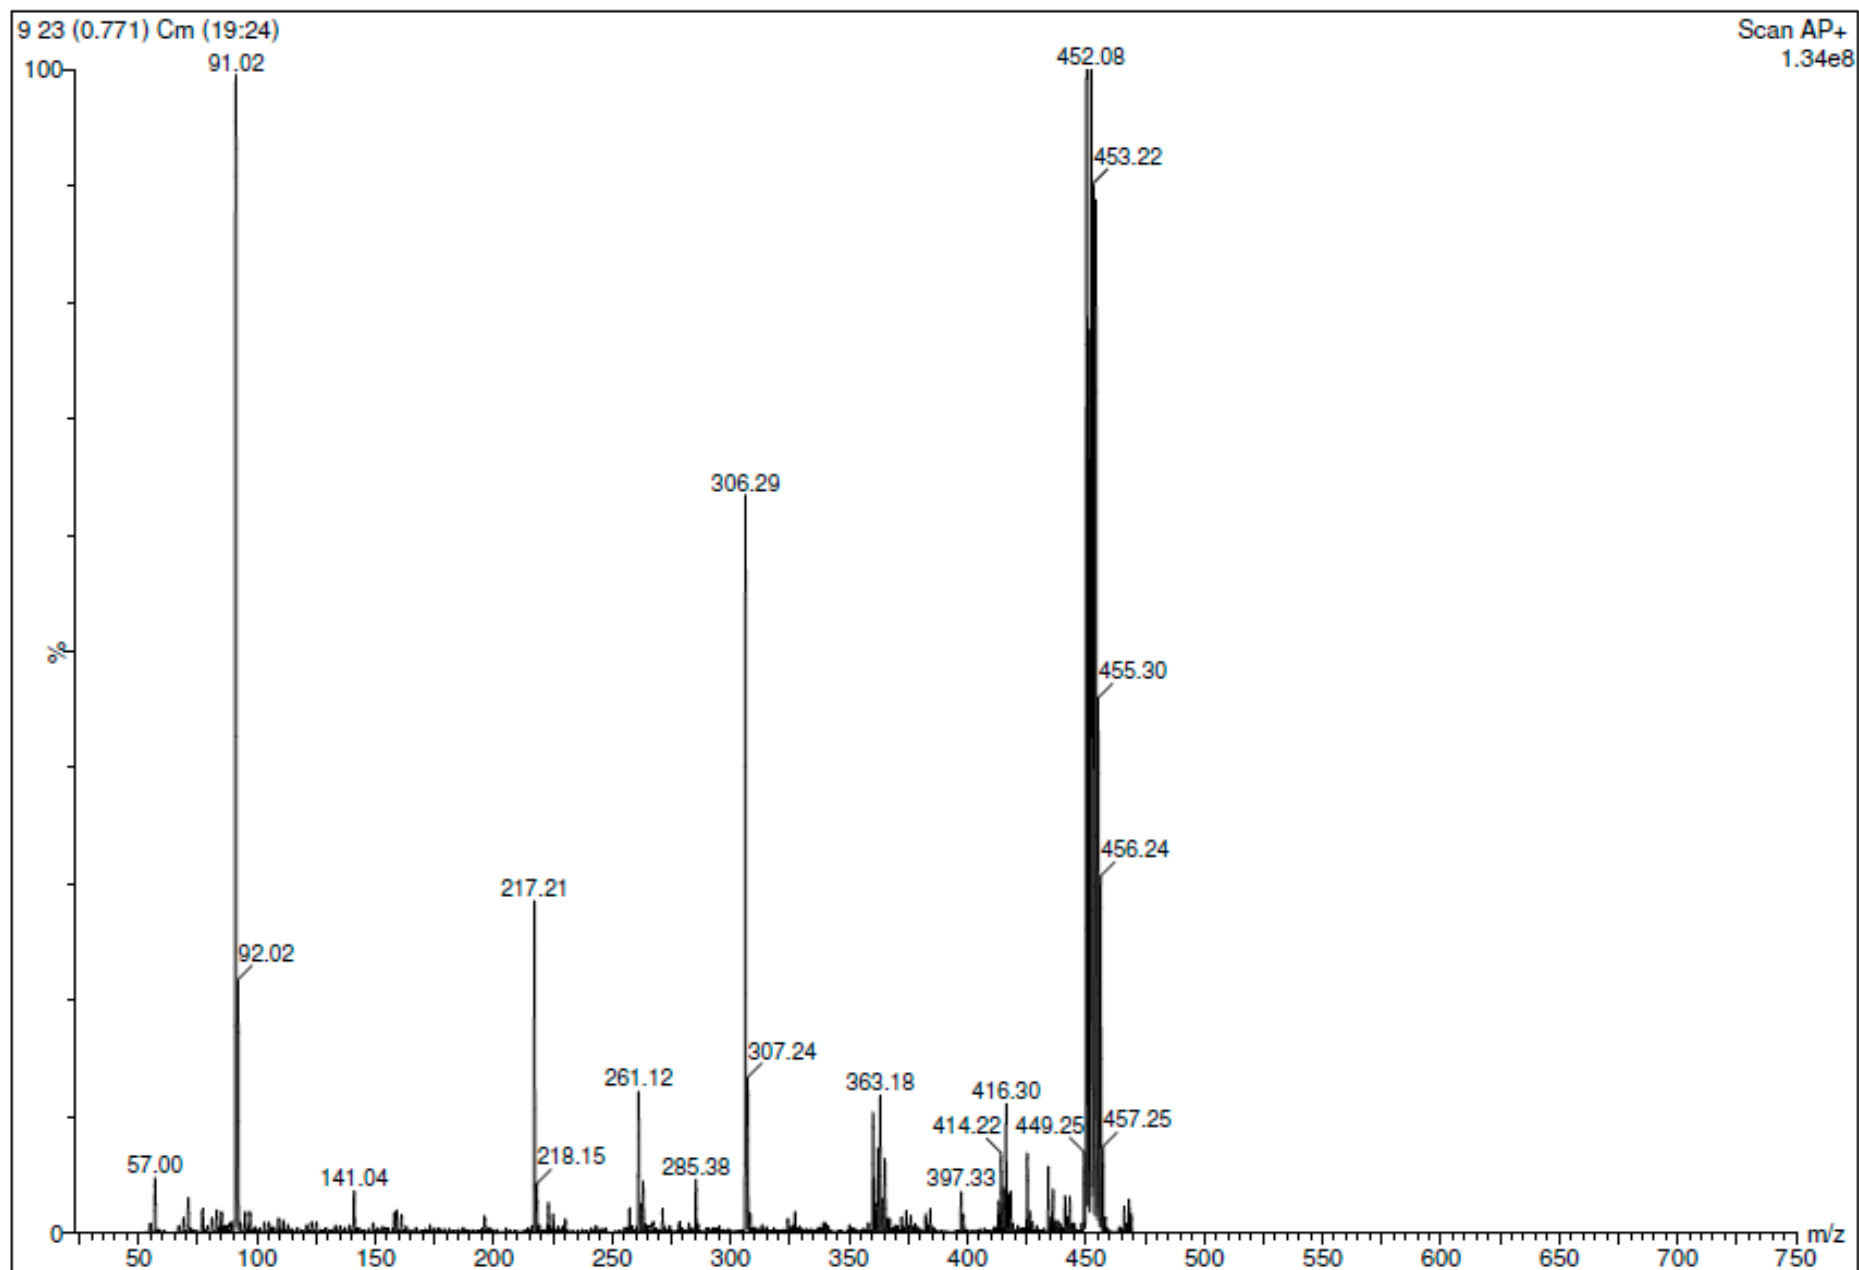

Figure S61 - MS spectrum of 5n

Table S7 - Fragmentation positions for peaks in MS spectrum of 5n

| <u>m/z</u>                           | <u>Fragmentation position</u>                                                                                                                                                                |  |
|--------------------------------------|----------------------------------------------------------------------------------------------------------------------------------------------------------------------------------------------|--|
| <b>452.08 – 457.25</b><br>(isotopes) | $[M+H]^+$                                                                                                                                                                                    |  |
| <b>414.22-416.30</b><br>(isotopes)   | 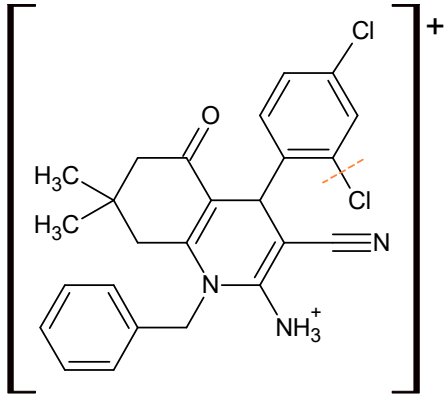 $\longrightarrow$      |  |
| <b>361.18 - 363.18</b><br>(isotopes) |  $\longrightarrow$    |  |
| <b>285.38</b>                        |  $\longrightarrow$  |  |



218.15

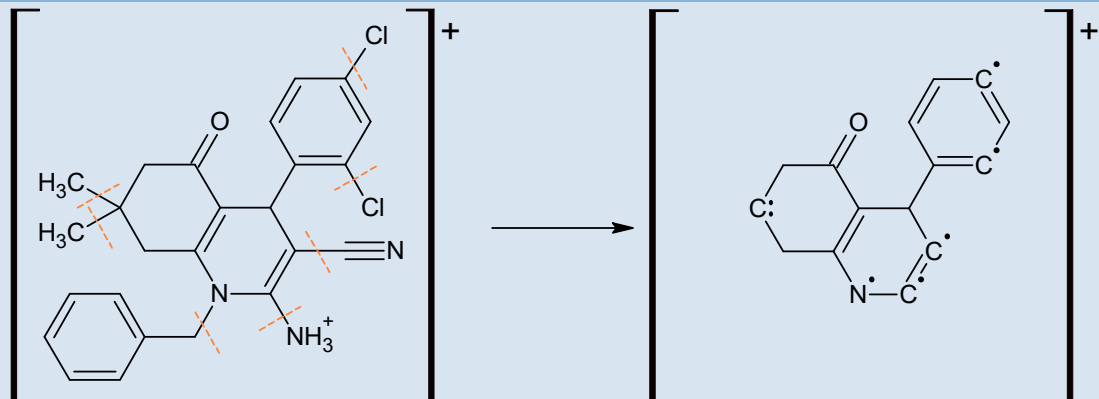

91.02

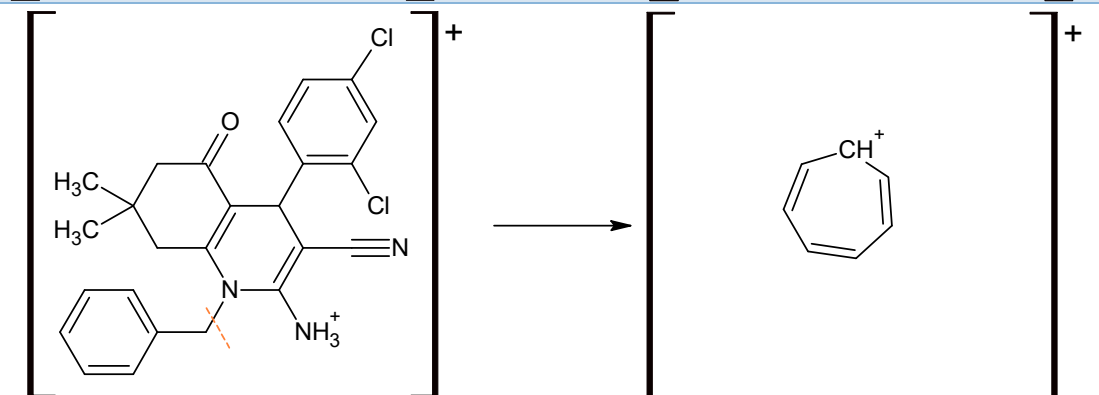

**1.15.**

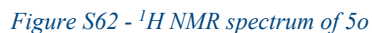

1.16. Product 5p: 2-amino-4-(4-cyanophenyl)-7,8-dimethyl-1-(4-(phenylazo)phenyl)-5-oxo-1,4,5,6,7,8-hexahydroquinoline-3-carbonitrile

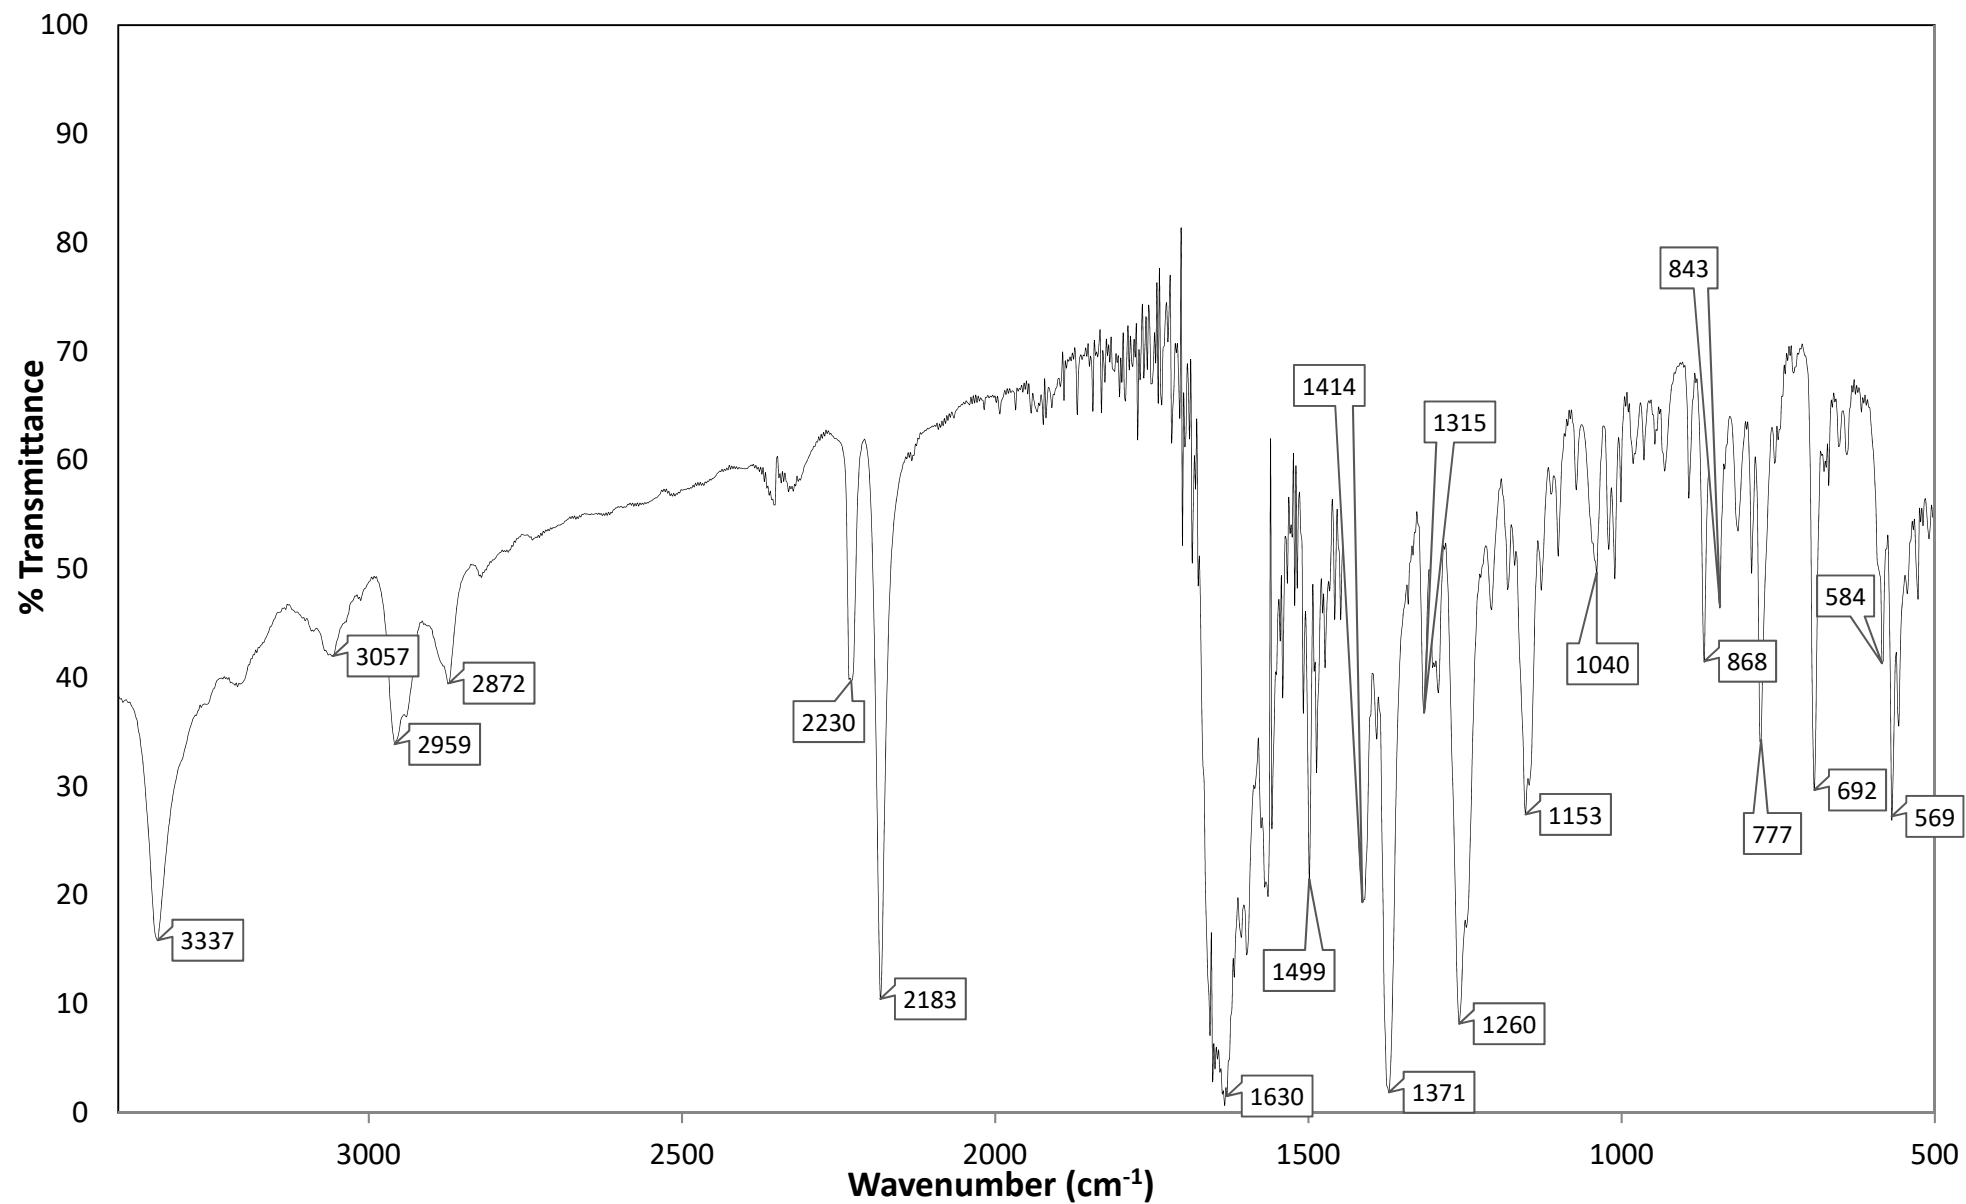

Figure S63 - IR spectrum of 5p

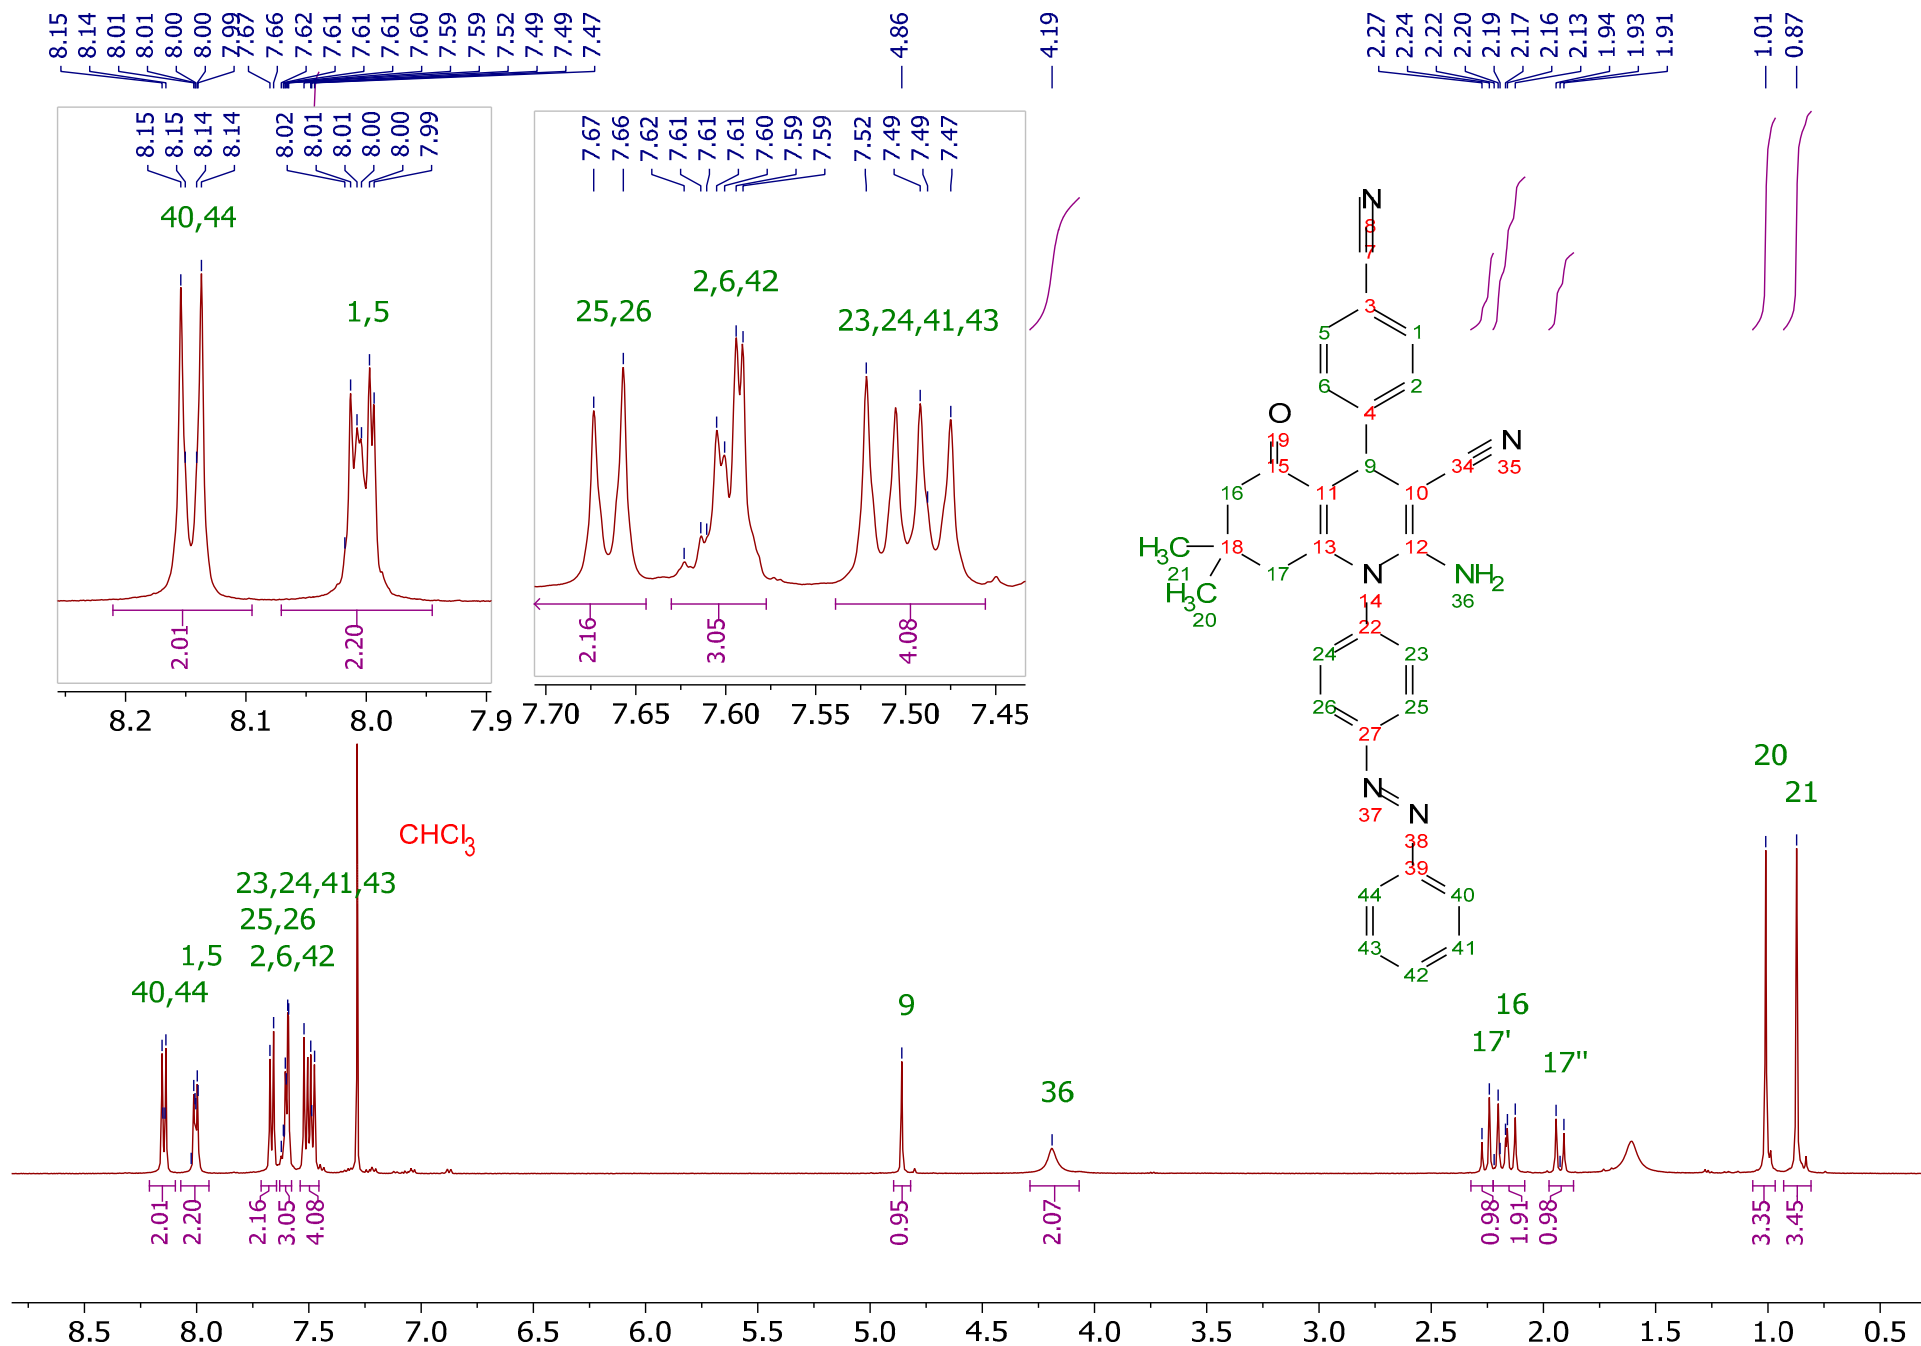

Figure S64 - <sup>1</sup>H NMR spectrum of 5p

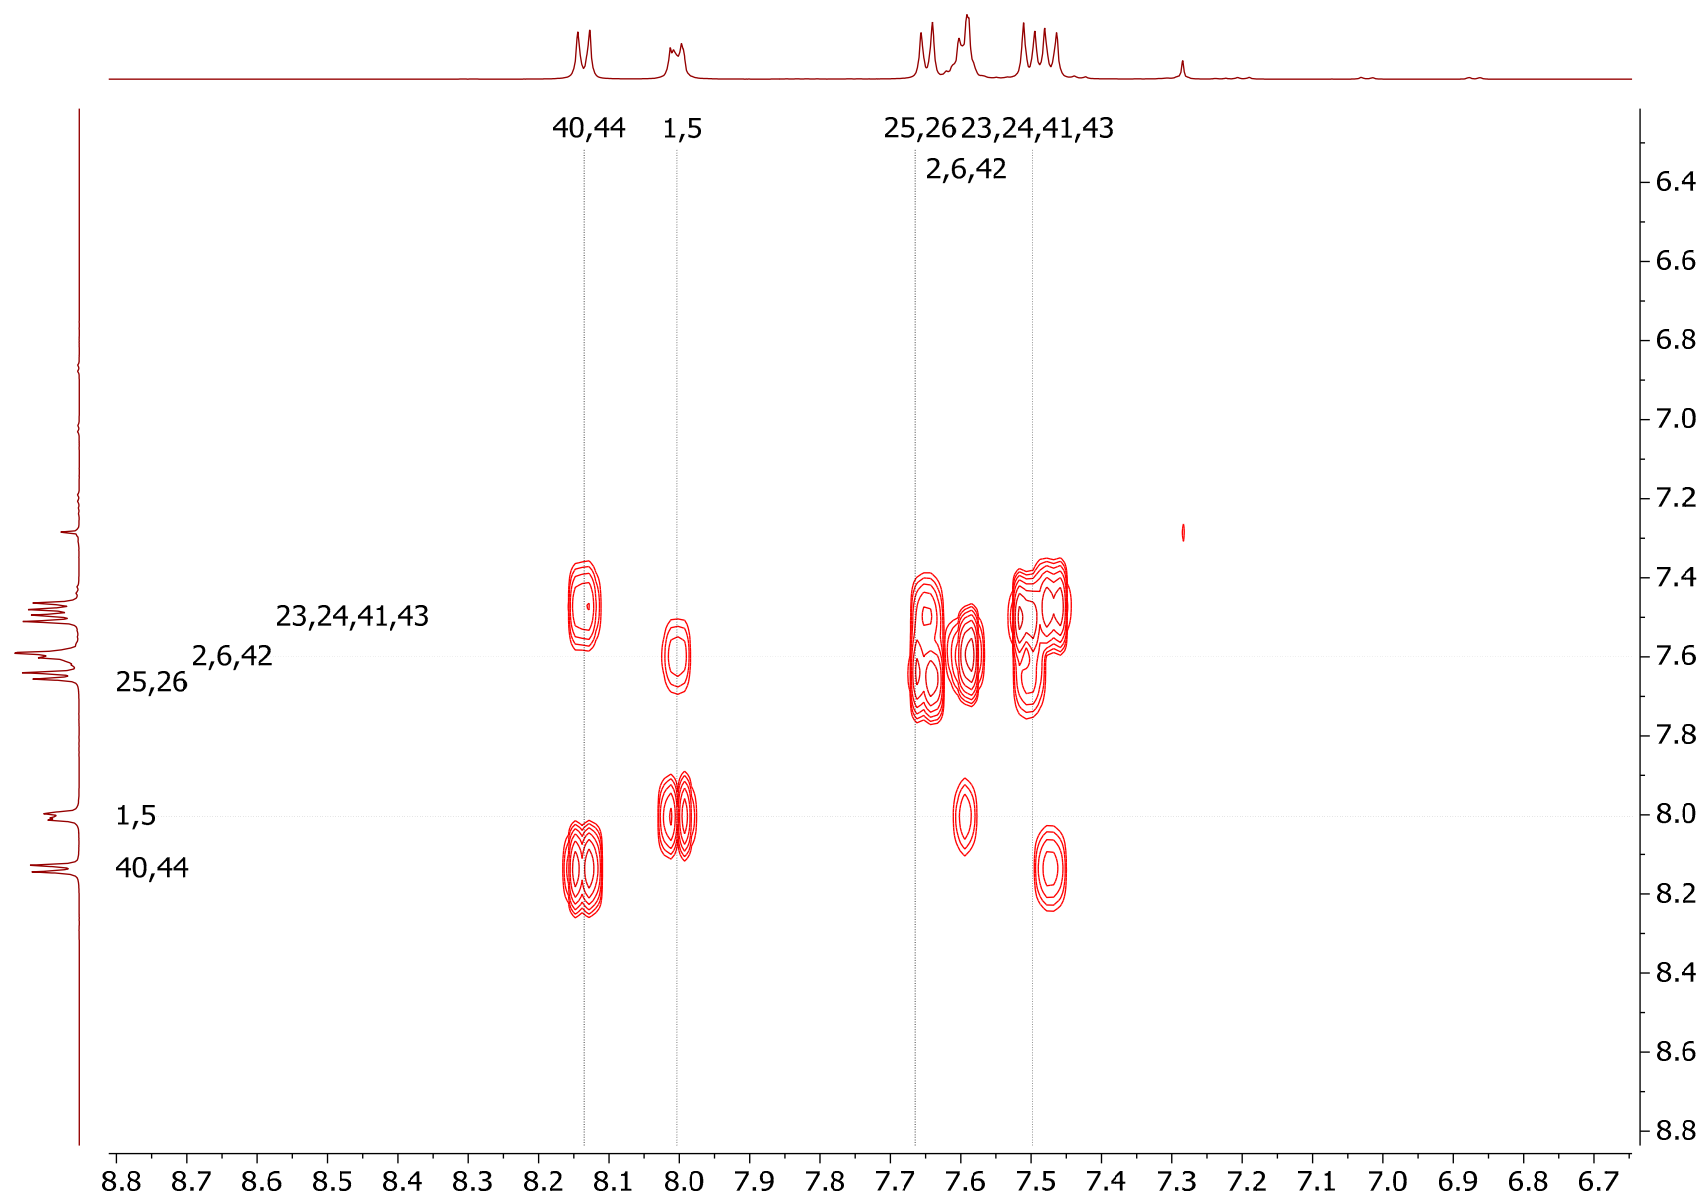

Figure S65 -  $^1\text{H}$ - $^1\text{H}$  COSY of 5p

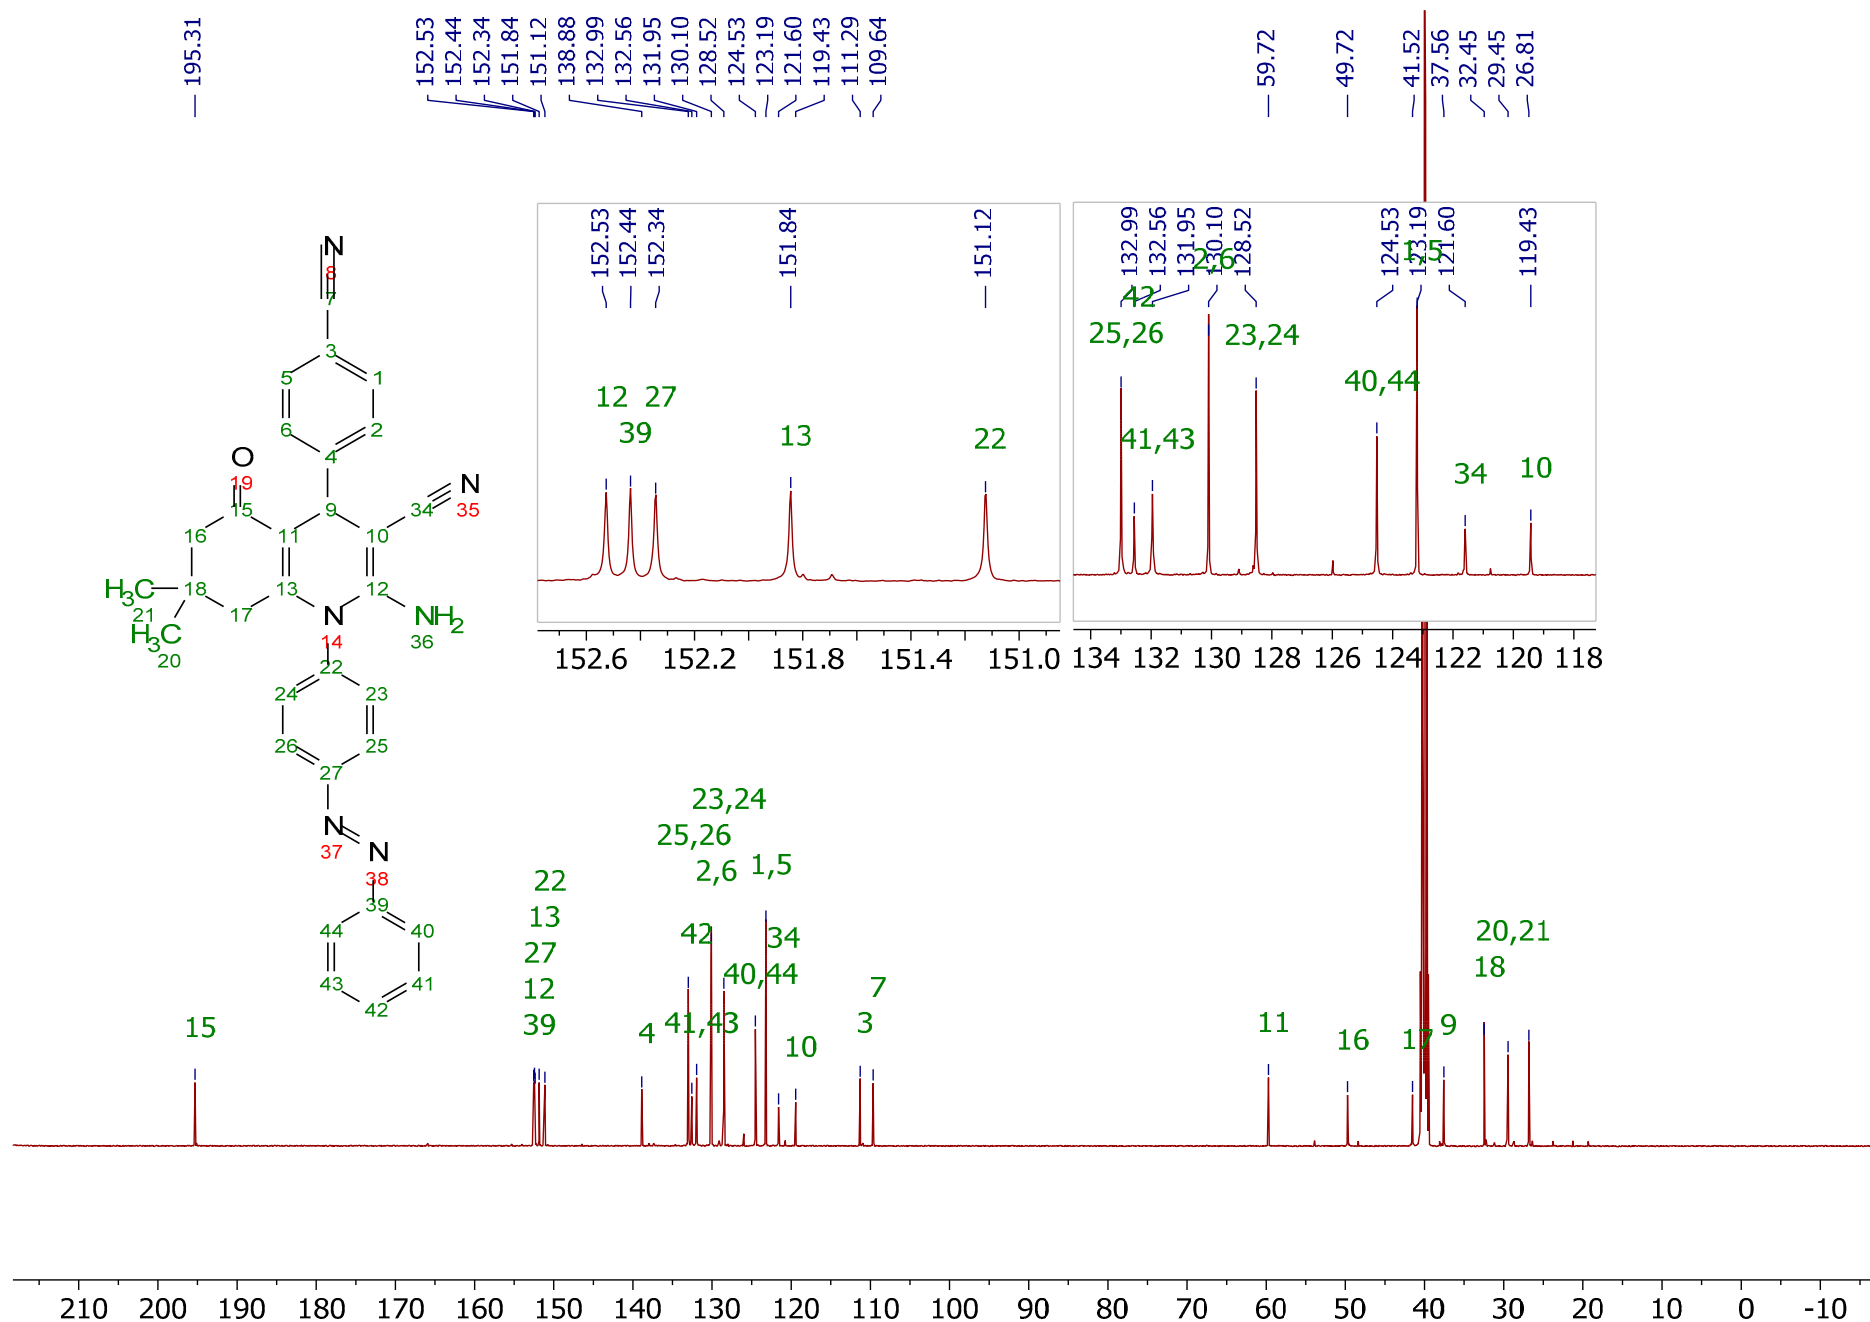

Figure S66 - <sup>13</sup>C NMR spectrum of 5p

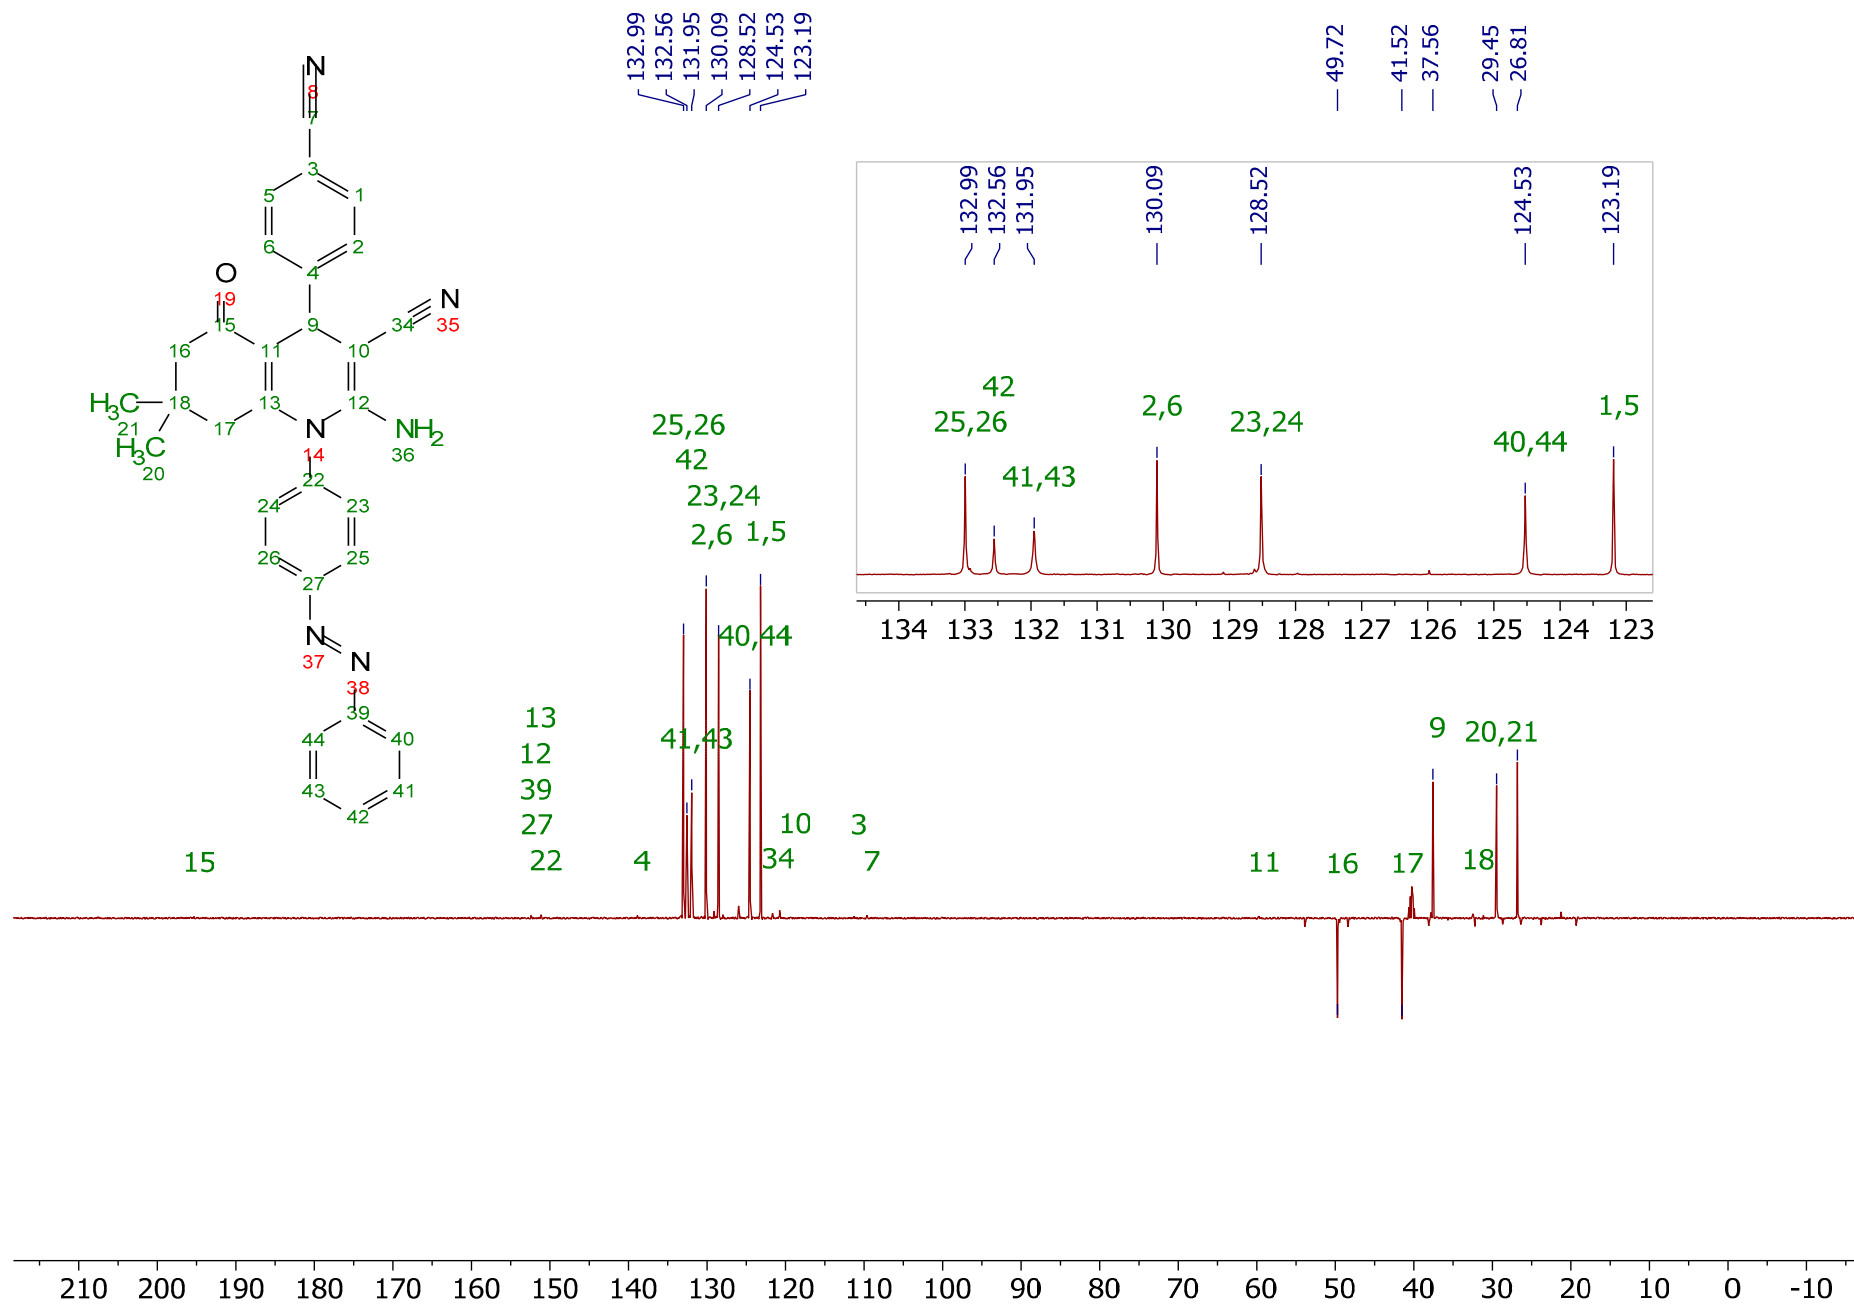

Figure S67 - DEPT spectrum of 5p

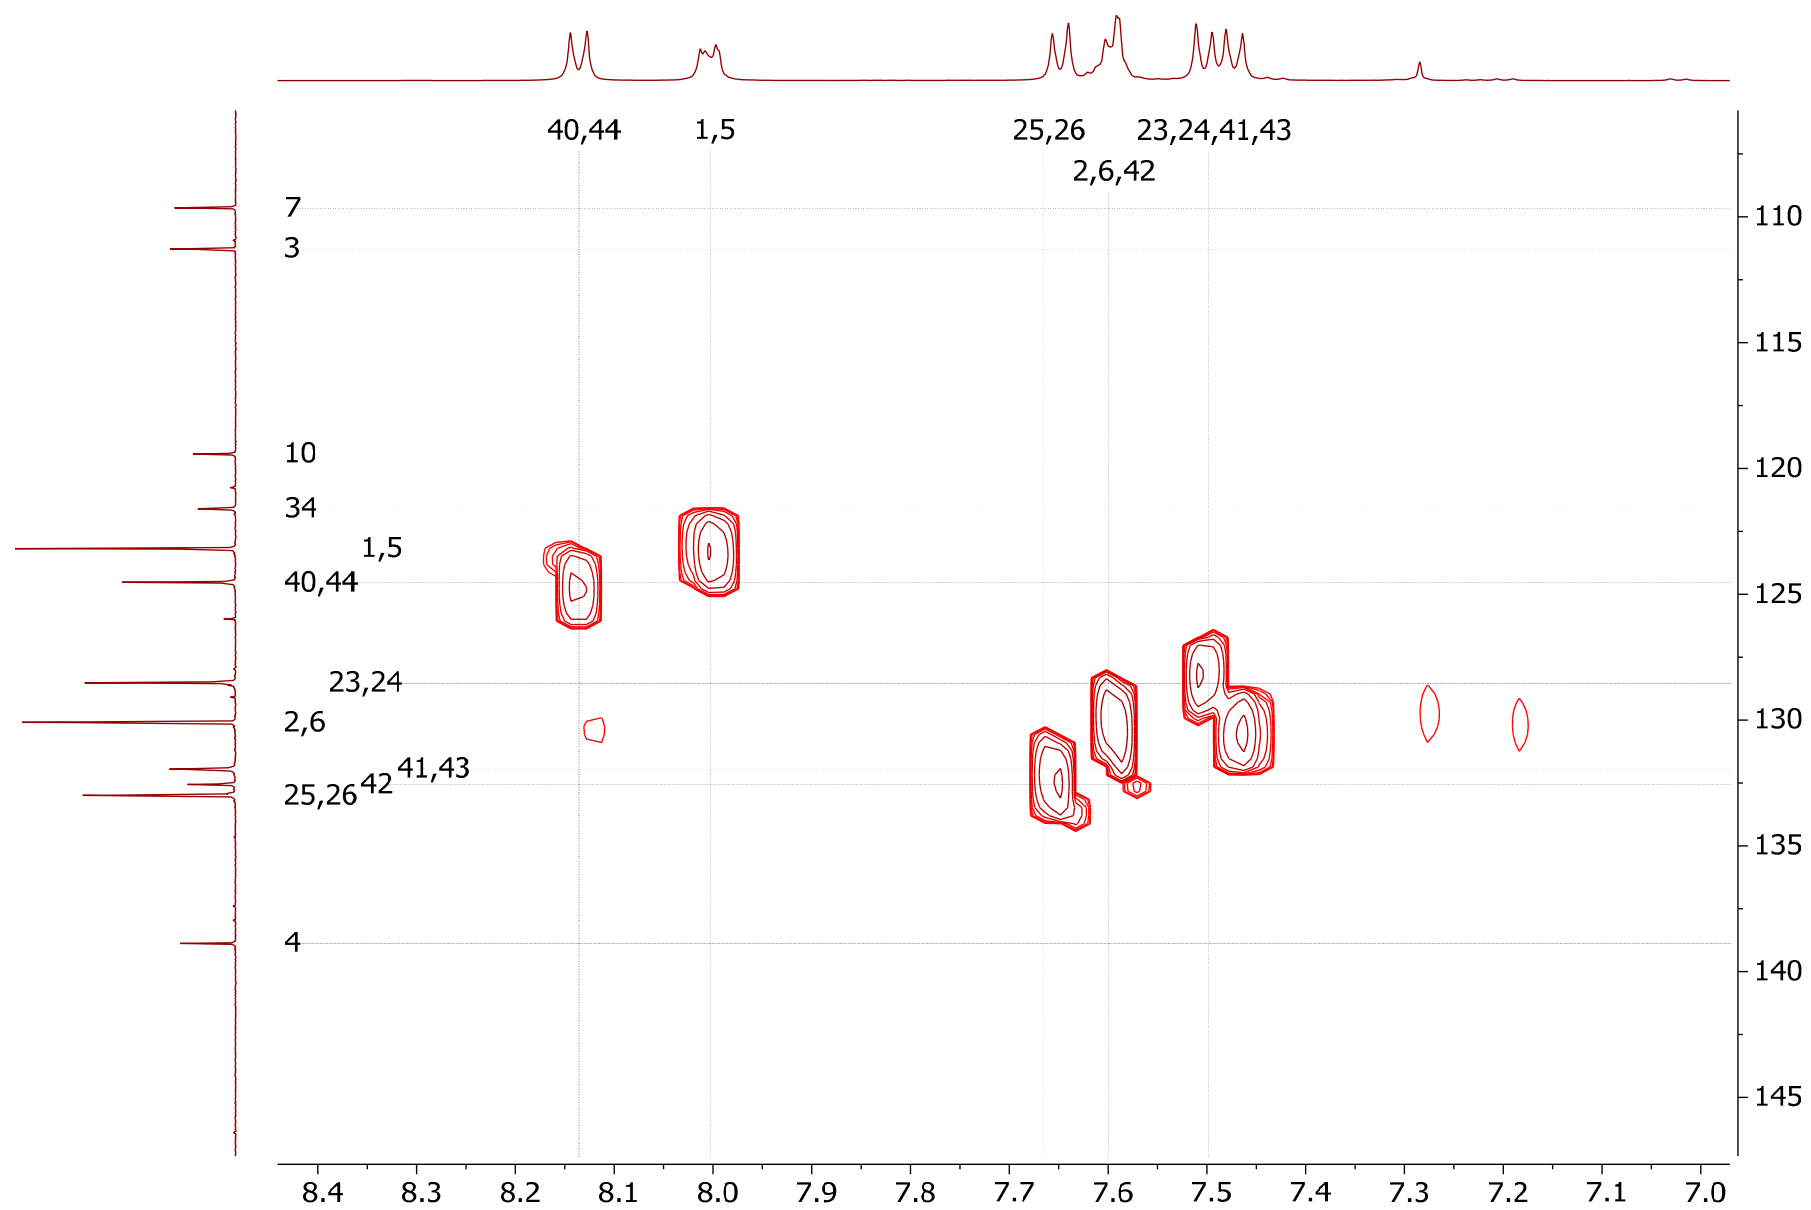

Figure S68 - HSQC spectrum of 5p



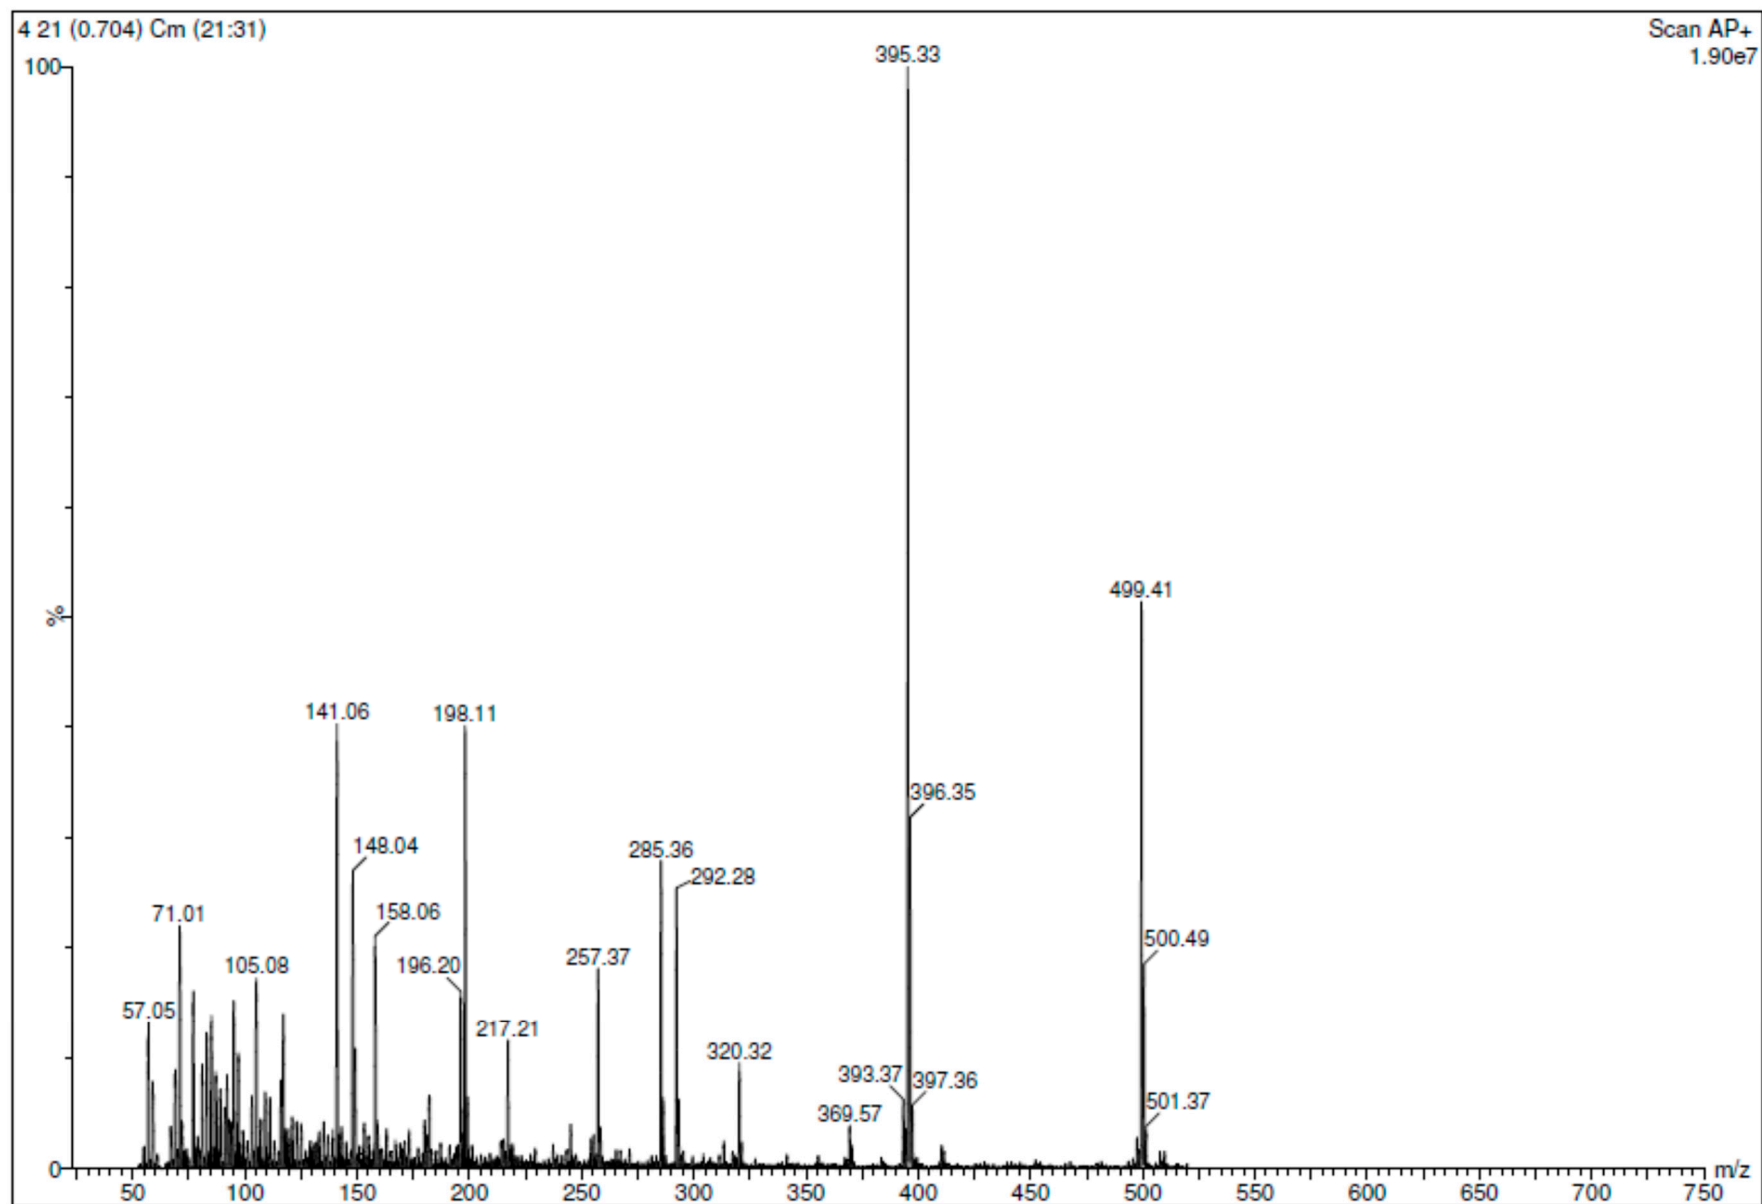

Figure S69 - MS spectrum of 5p

Table S8 - Fragmentation positions for peaks in MS spectrum of 5p

| m/z    | Fragmentation position                                                                                                                                                     |  |
|--------|----------------------------------------------------------------------------------------------------------------------------------------------------------------------------|--|
| 499.41 | $[M+H]^+$                                                                                                                                                                  |  |
| 395.33 | 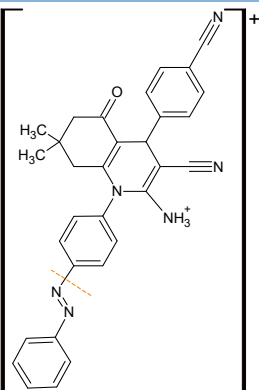      |  |
| 292.28 |     |  |
| 217.21 |   |  |

1.17. Product 5q: 2-amino-4-(2,4-dichlorophenyl)-7,8-dimethyl-1-(4-(3-methylphenylazo)-3-methylphenyl)-5-oxo-1,4,5,6,7,8-hexahydroquinoline-3-carbonitrile

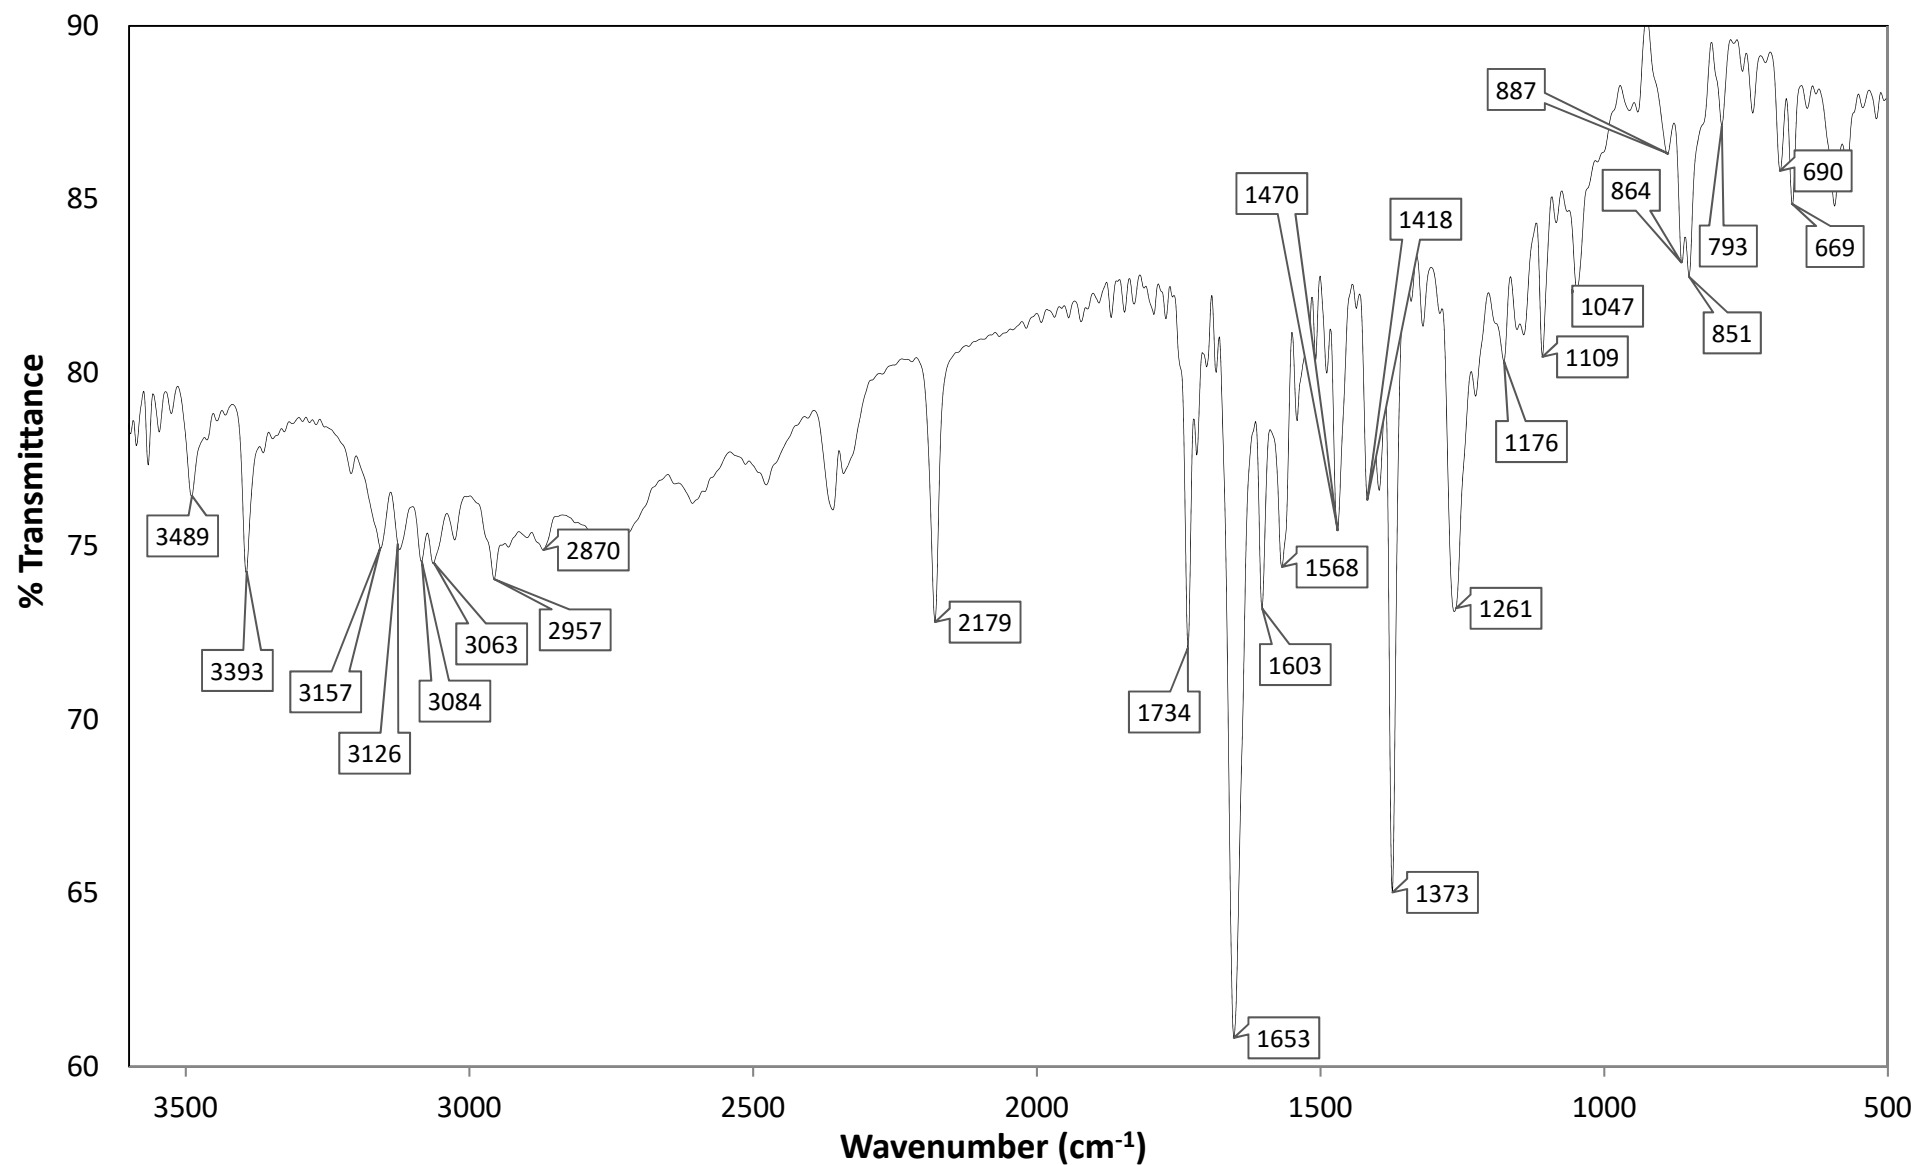

Figure S70 - IR spectrum of 29q

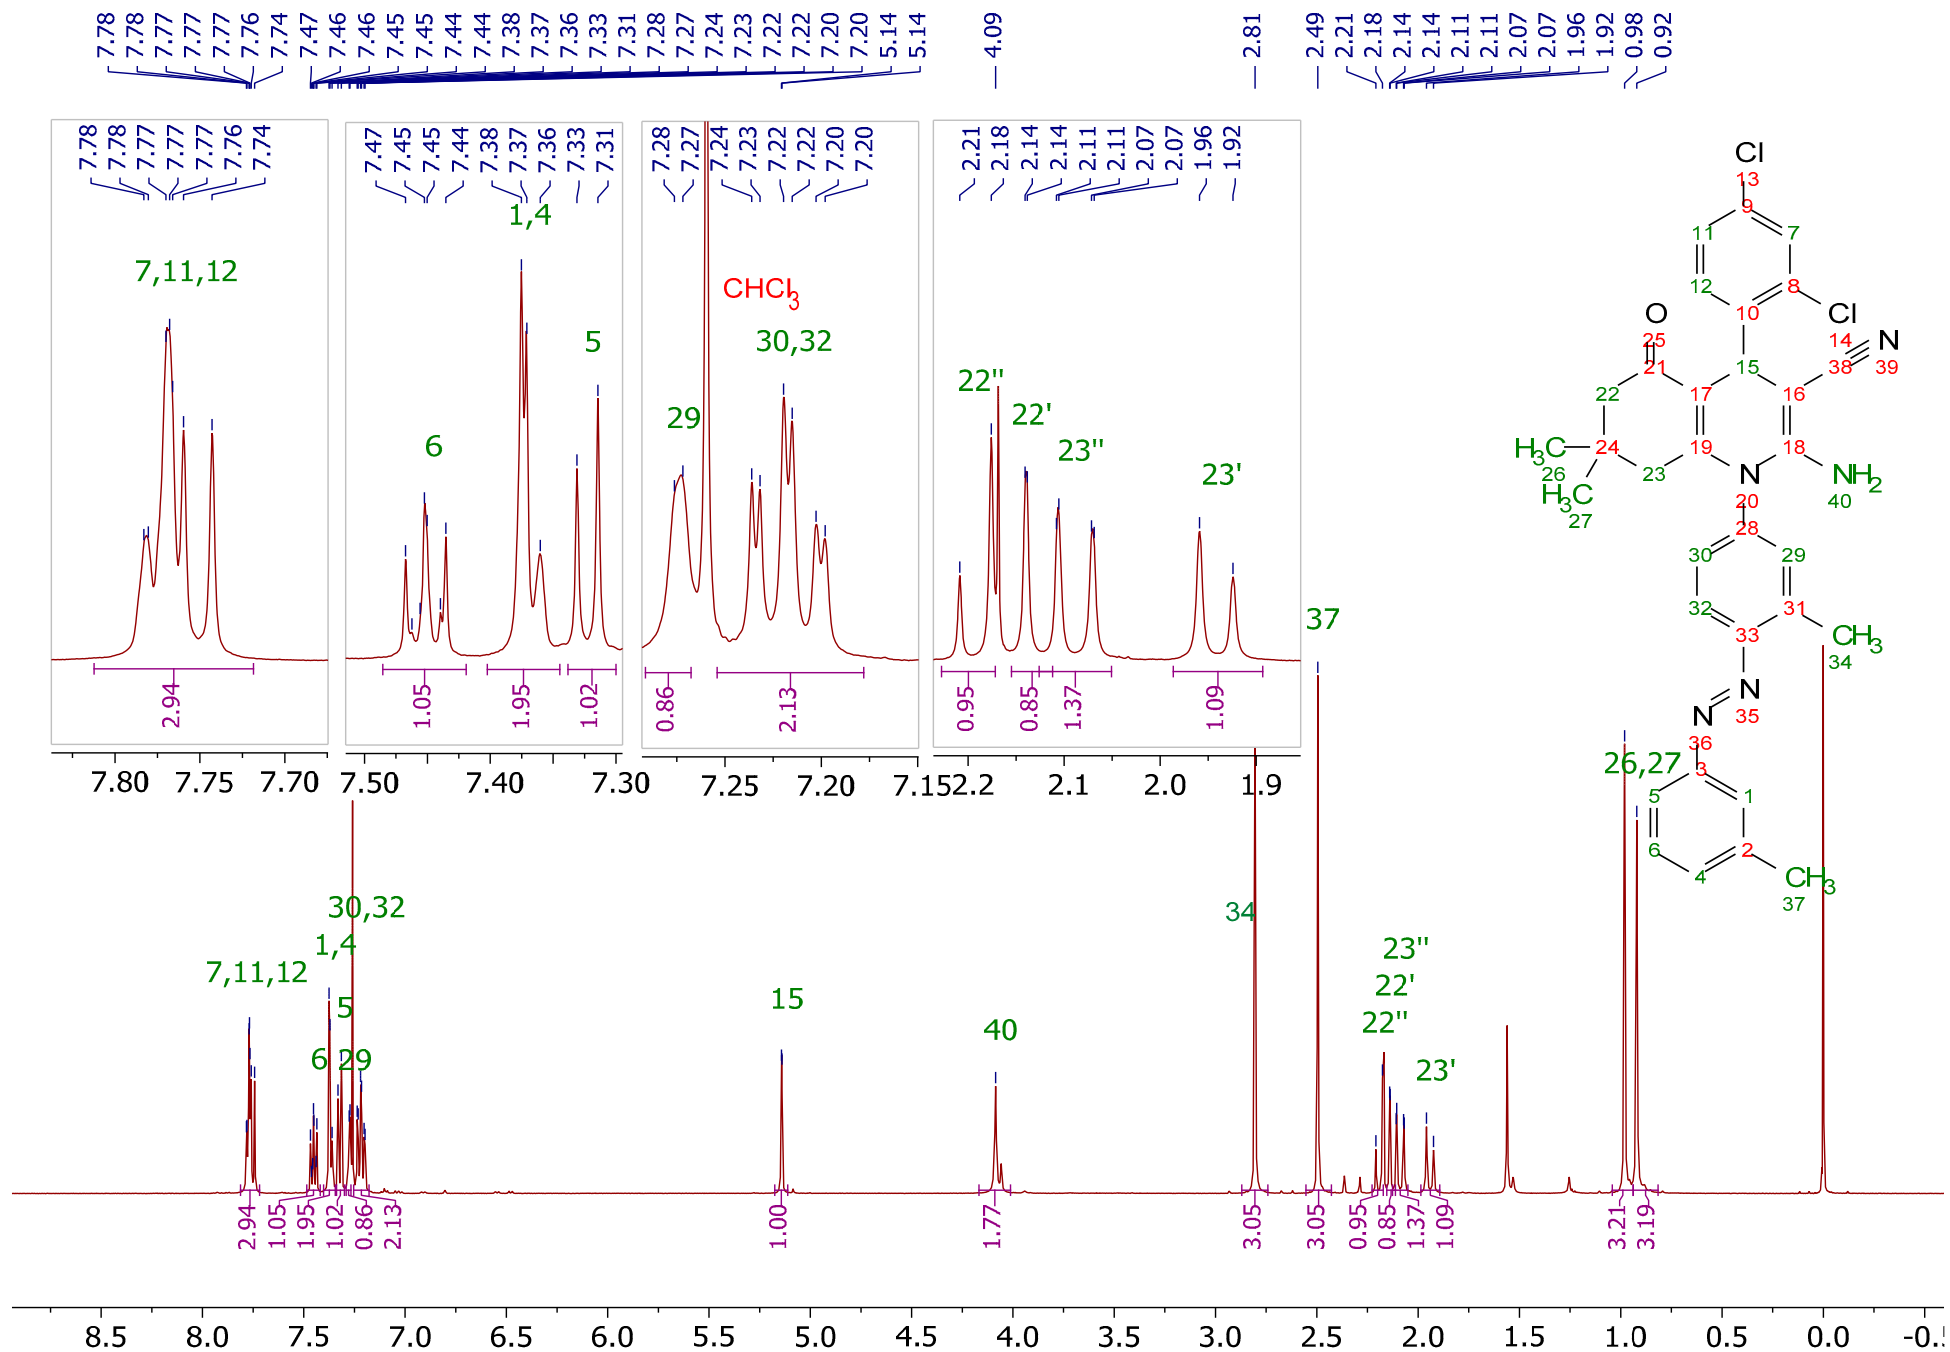

Figure S71 - <sup>1</sup>H NMR spectrum of 5q

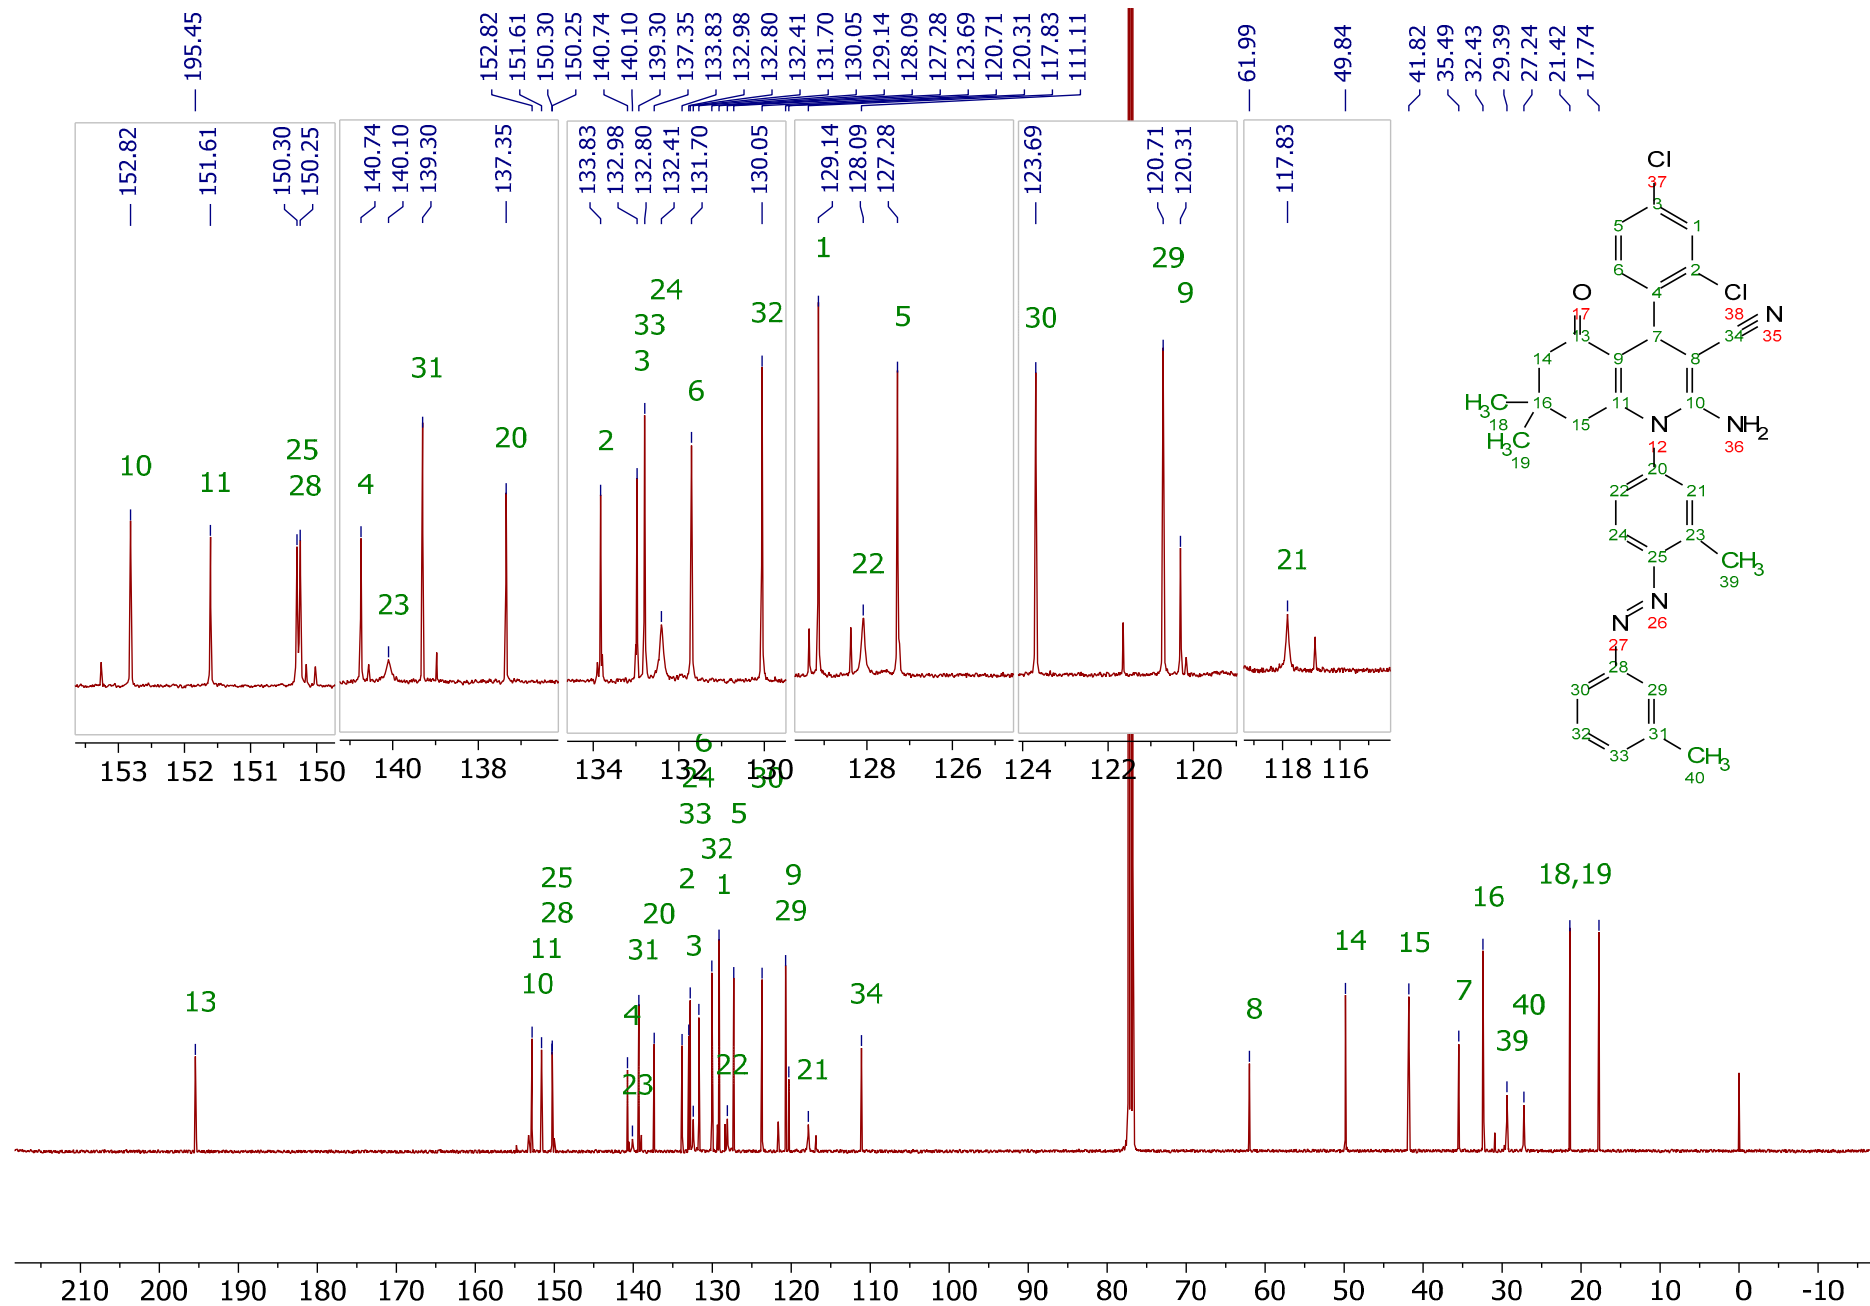

Figure S72 - <sup>13</sup>C NMR spectrum of 5q

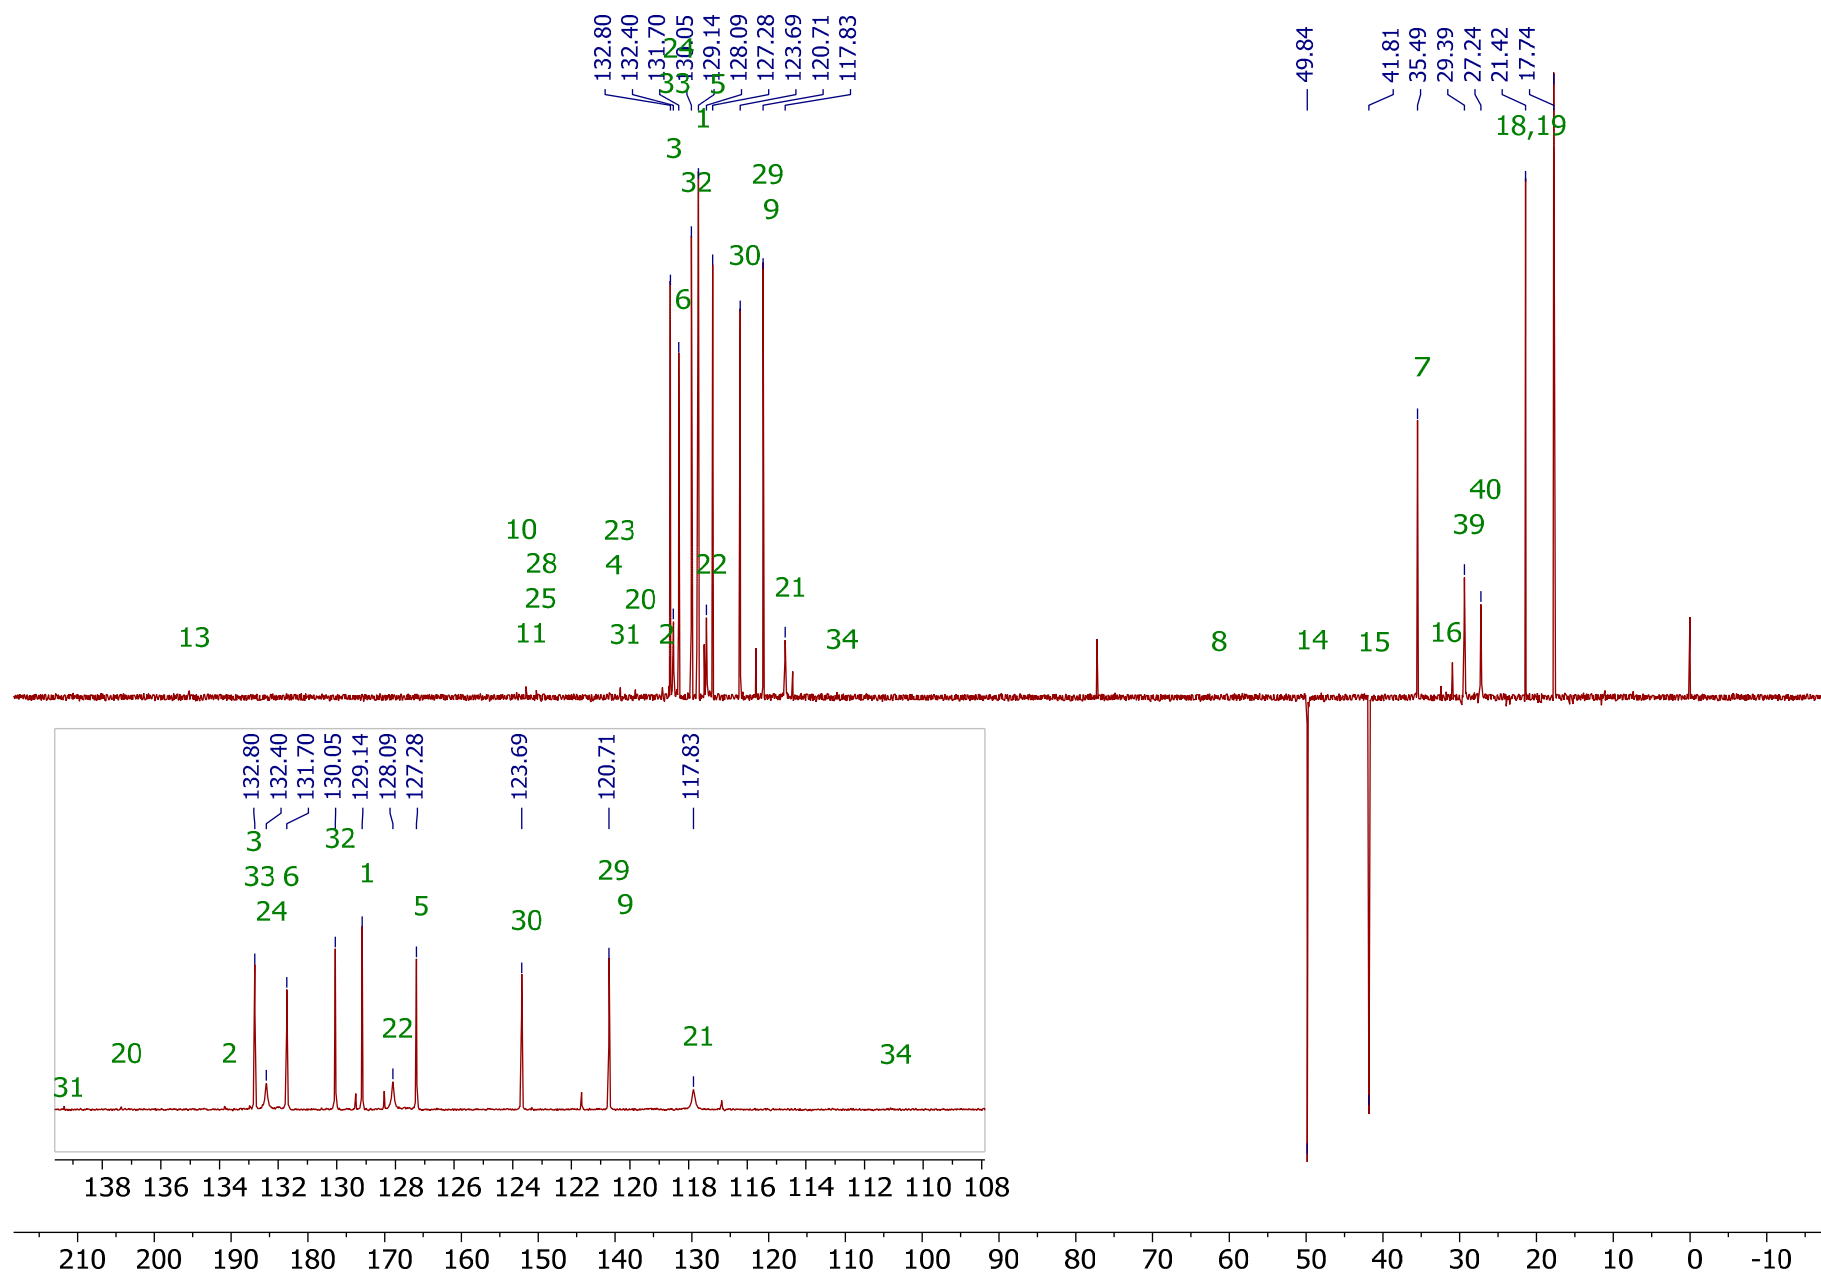

Figure S73 - DEPT spectrum of 5q

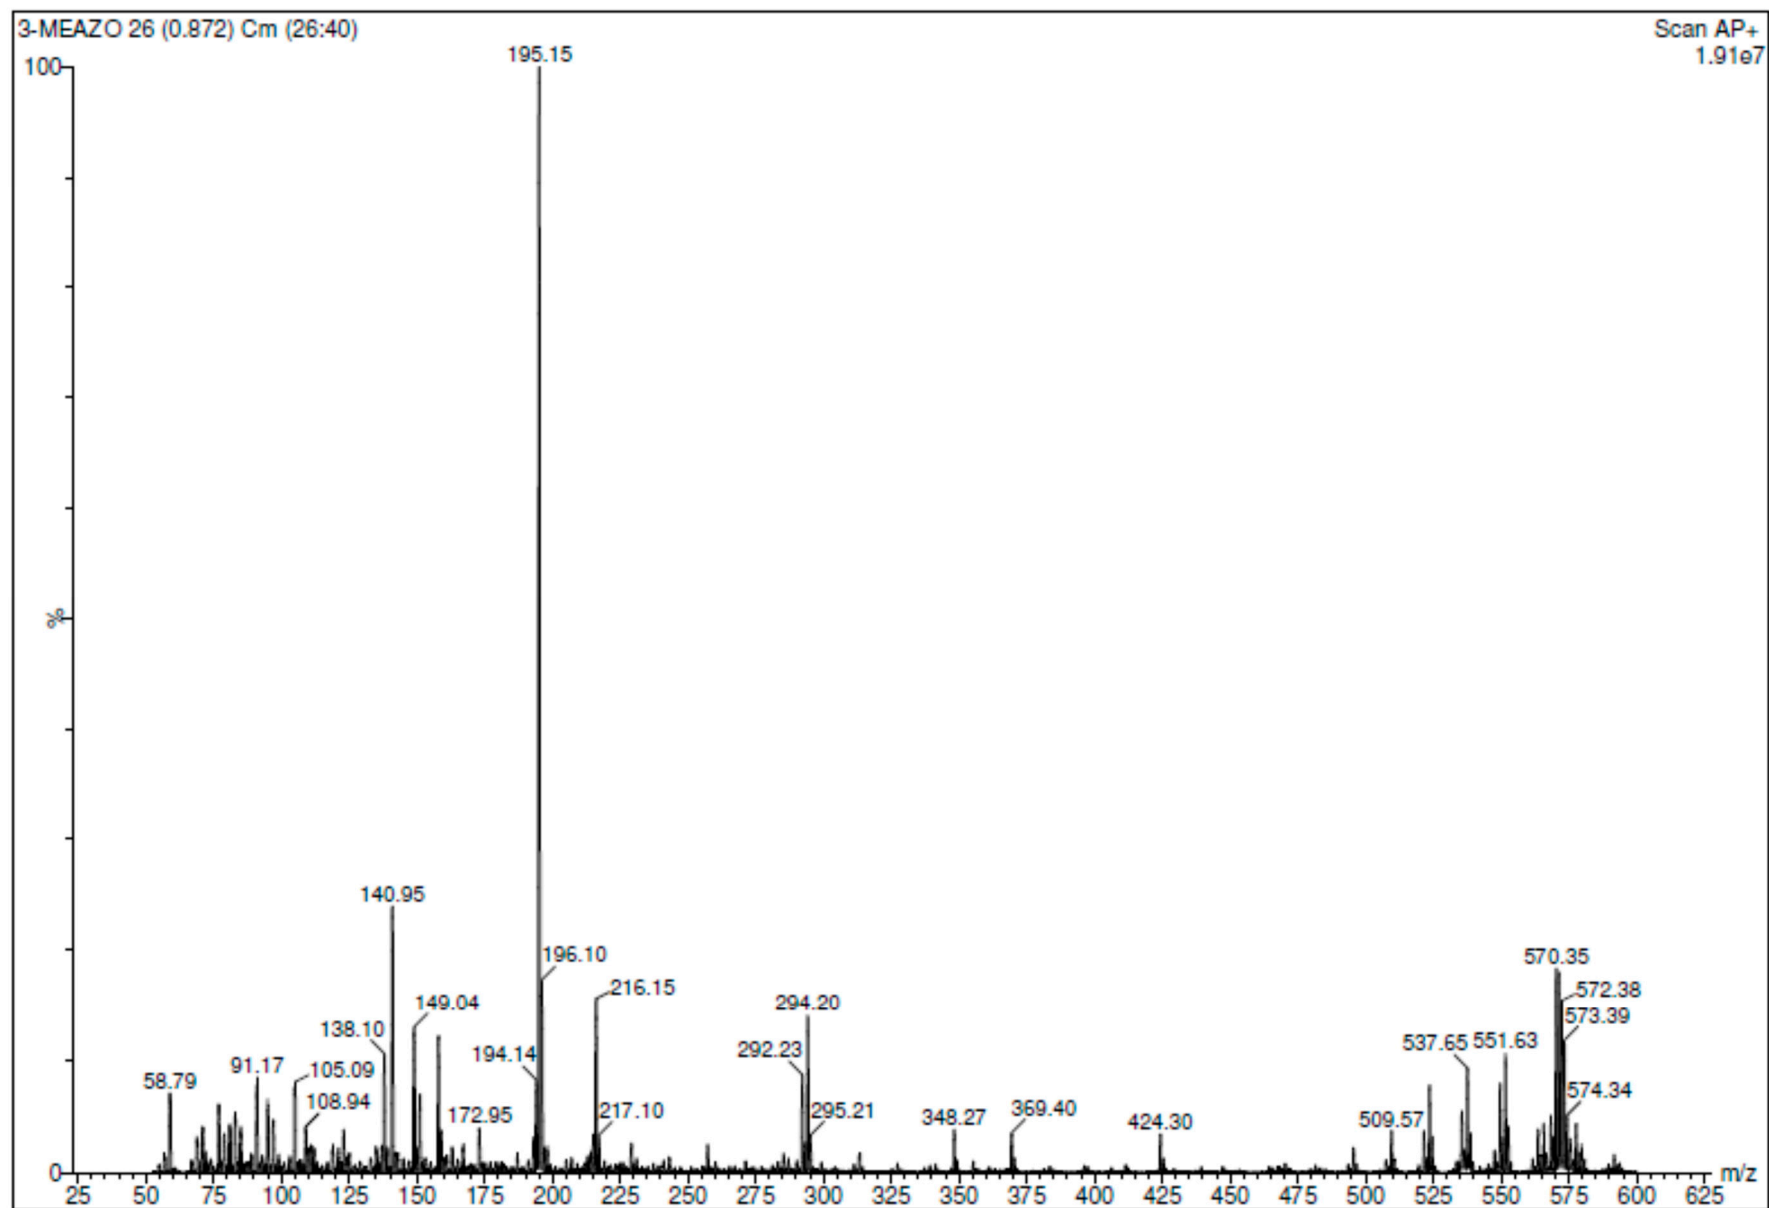

Figure S74 - MS spectrum of 5q

Table S9 - Fragmentation positions for peaks in MS spectrum of 29q

| <u>m/z</u>            | <u>Fragmentation position</u>                                                                                                                                         | <u>m/z</u> | <u>Fragmentation position</u>                                                                                                                                             |
|-----------------------|-----------------------------------------------------------------------------------------------------------------------------------------------------------------------|------------|---------------------------------------------------------------------------------------------------------------------------------------------------------------------------|
| 570.35<br>–<br>574.34 | [M+H] <sup>+</sup><br>(isotopes)                                                                                                                                      | 424.30     | 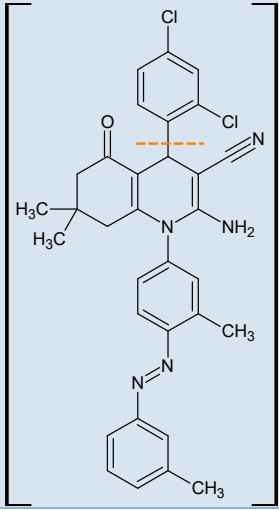    |
| 537.65                |   | 216.15     |   |



195.15

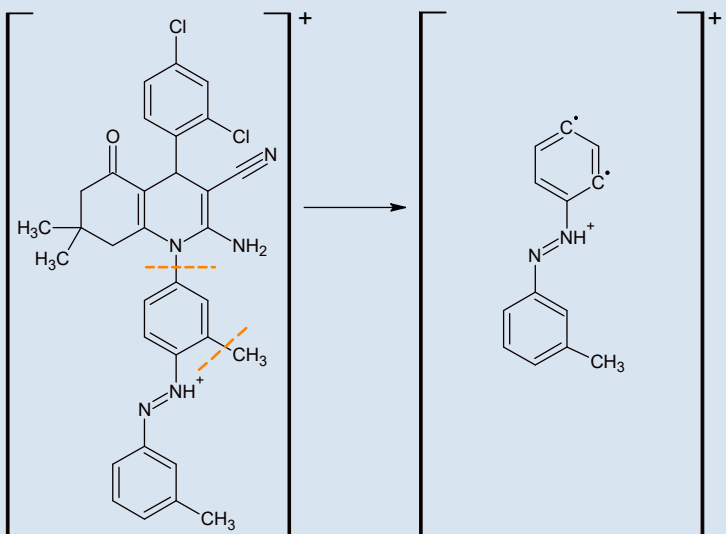

1.18. **Product 5s: 2-amino-4-(4-methylphenyl)-5-oxo-1-phenyl-1,4,5,6,7,8-hexahydroquinoline-3-carbonitrile**

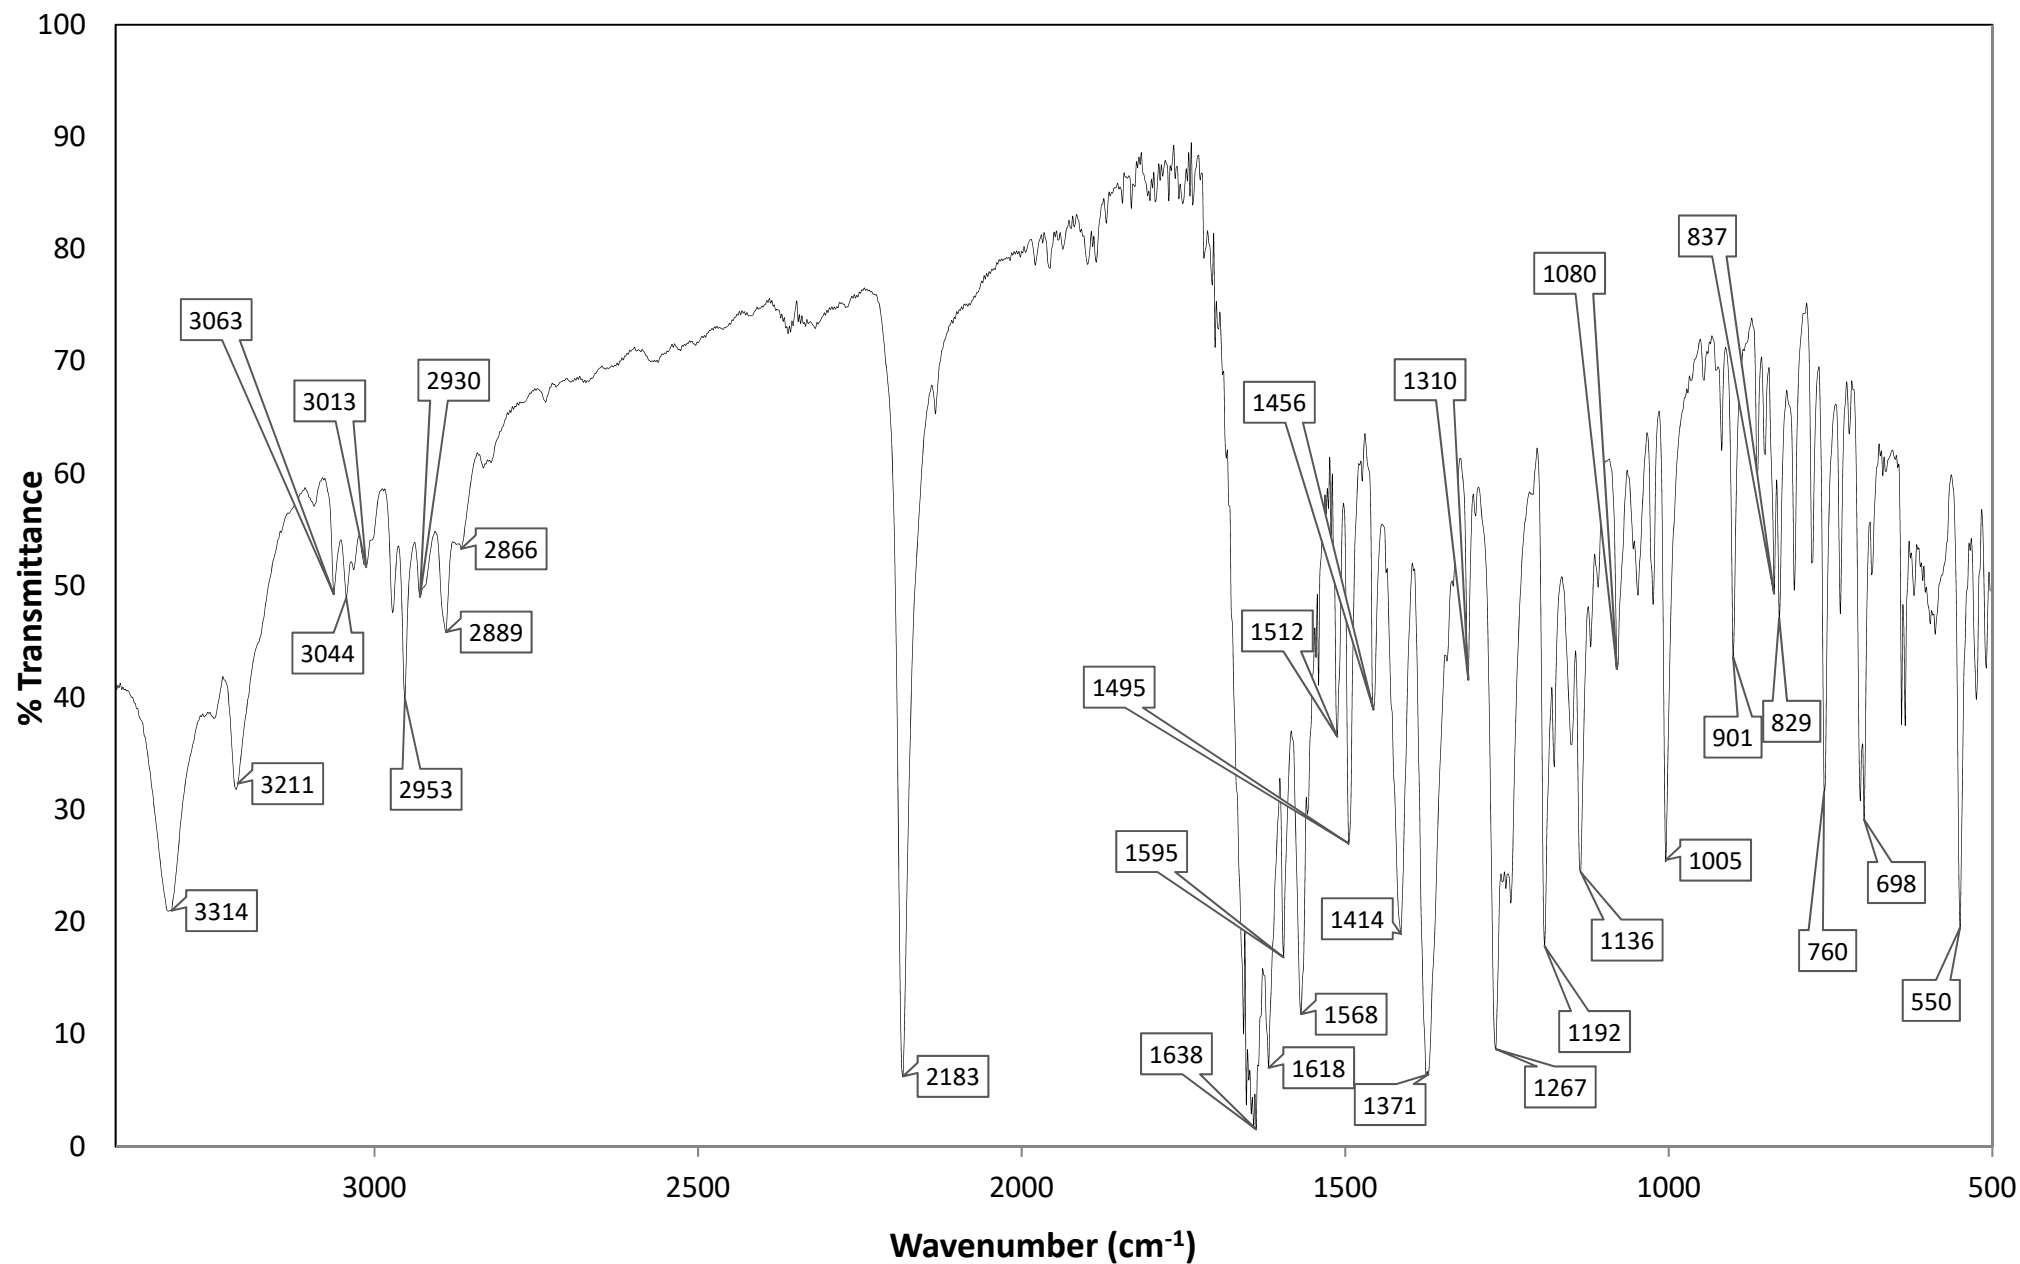

Figure S75 - IR spectrum of 5s

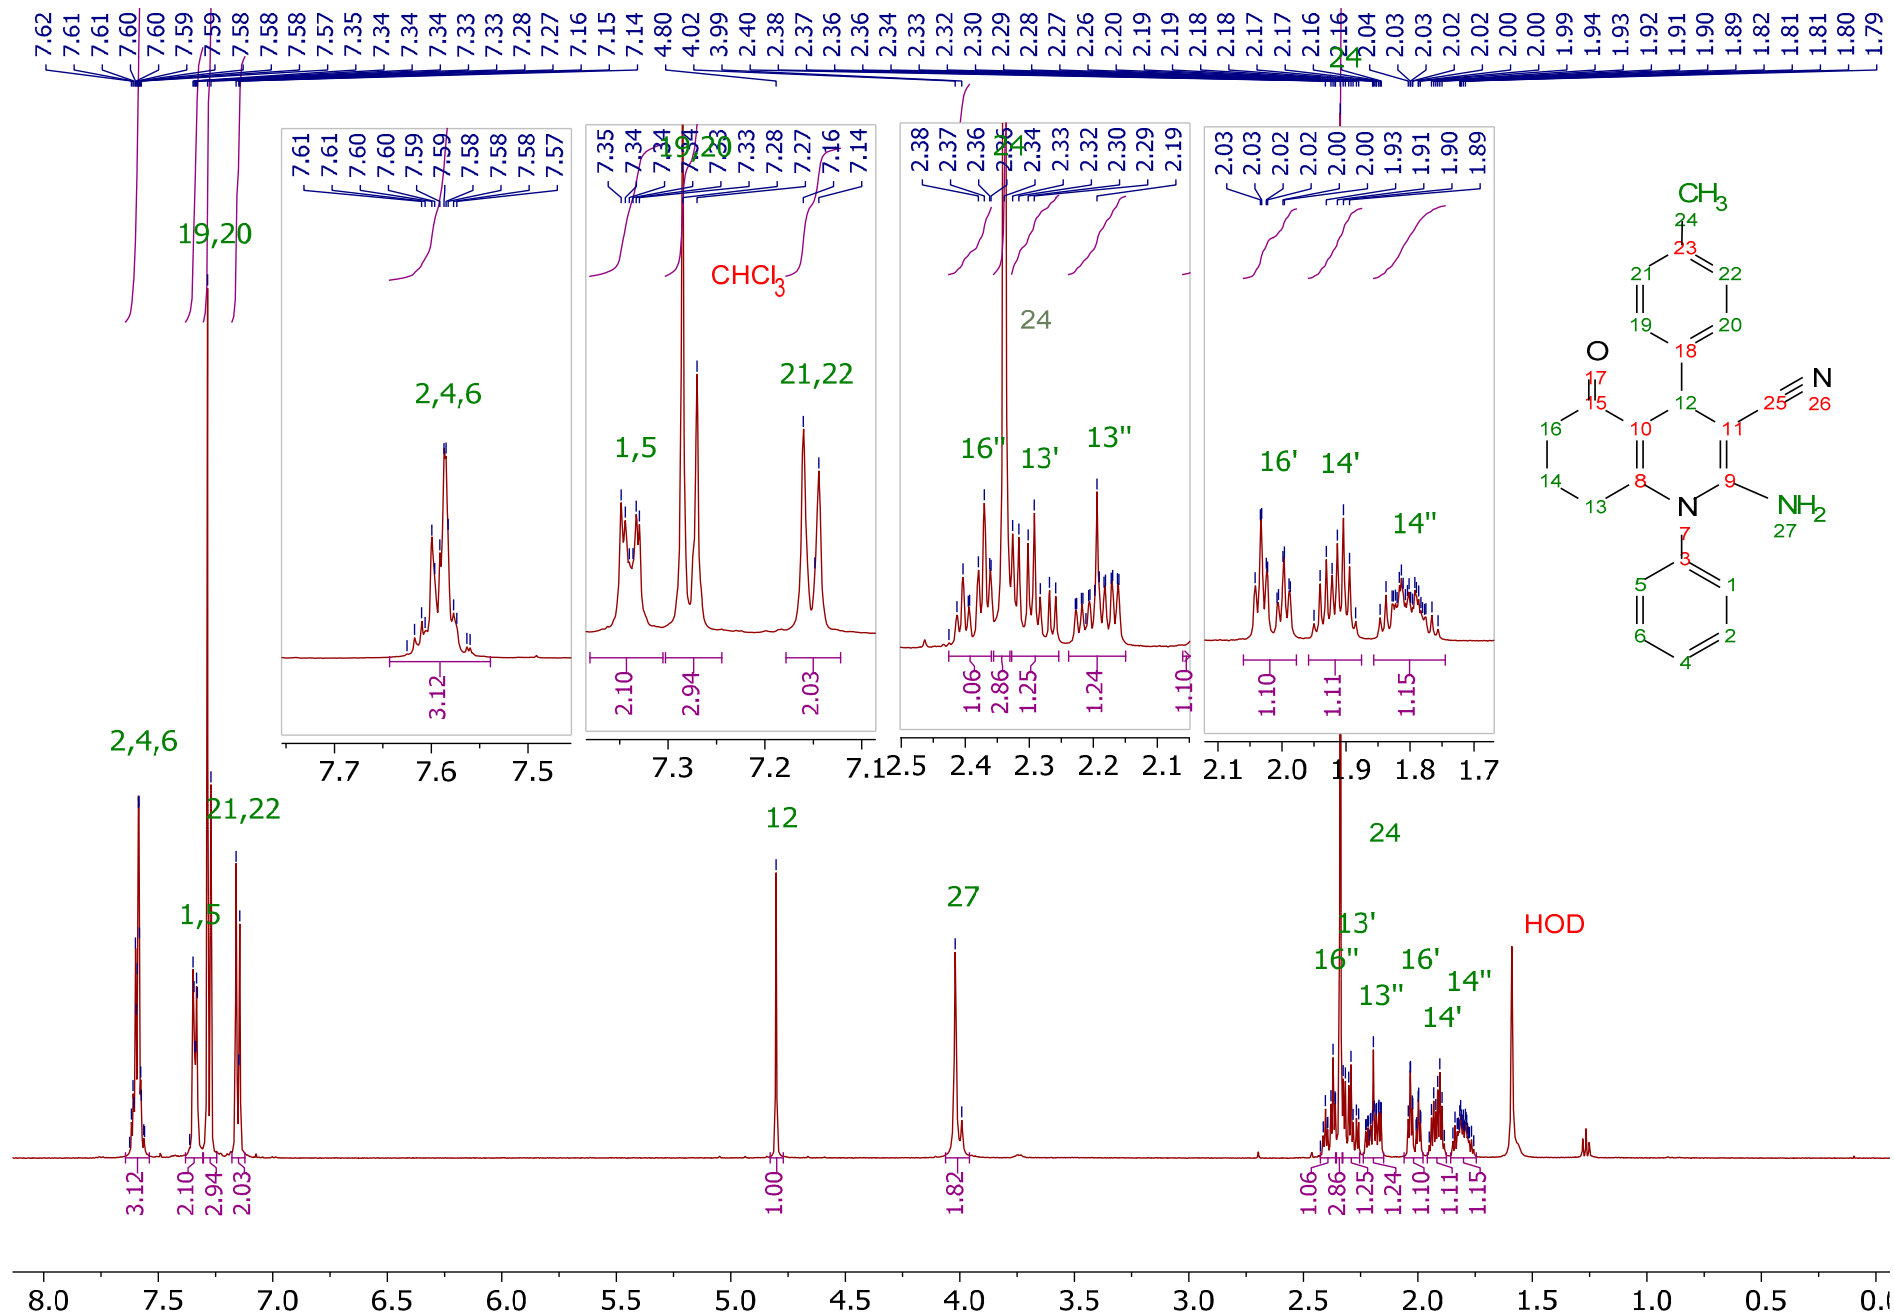

Figure S76 -  $^1\text{H}$  NMR spectrum of 5s

1.19. **Product 5t: 2-amino-4-(4-chlorophenyl)-5-oxo-1-phenyl-1,4,5,6,7,8-hexahydroquinoline-3-carbonitrile**

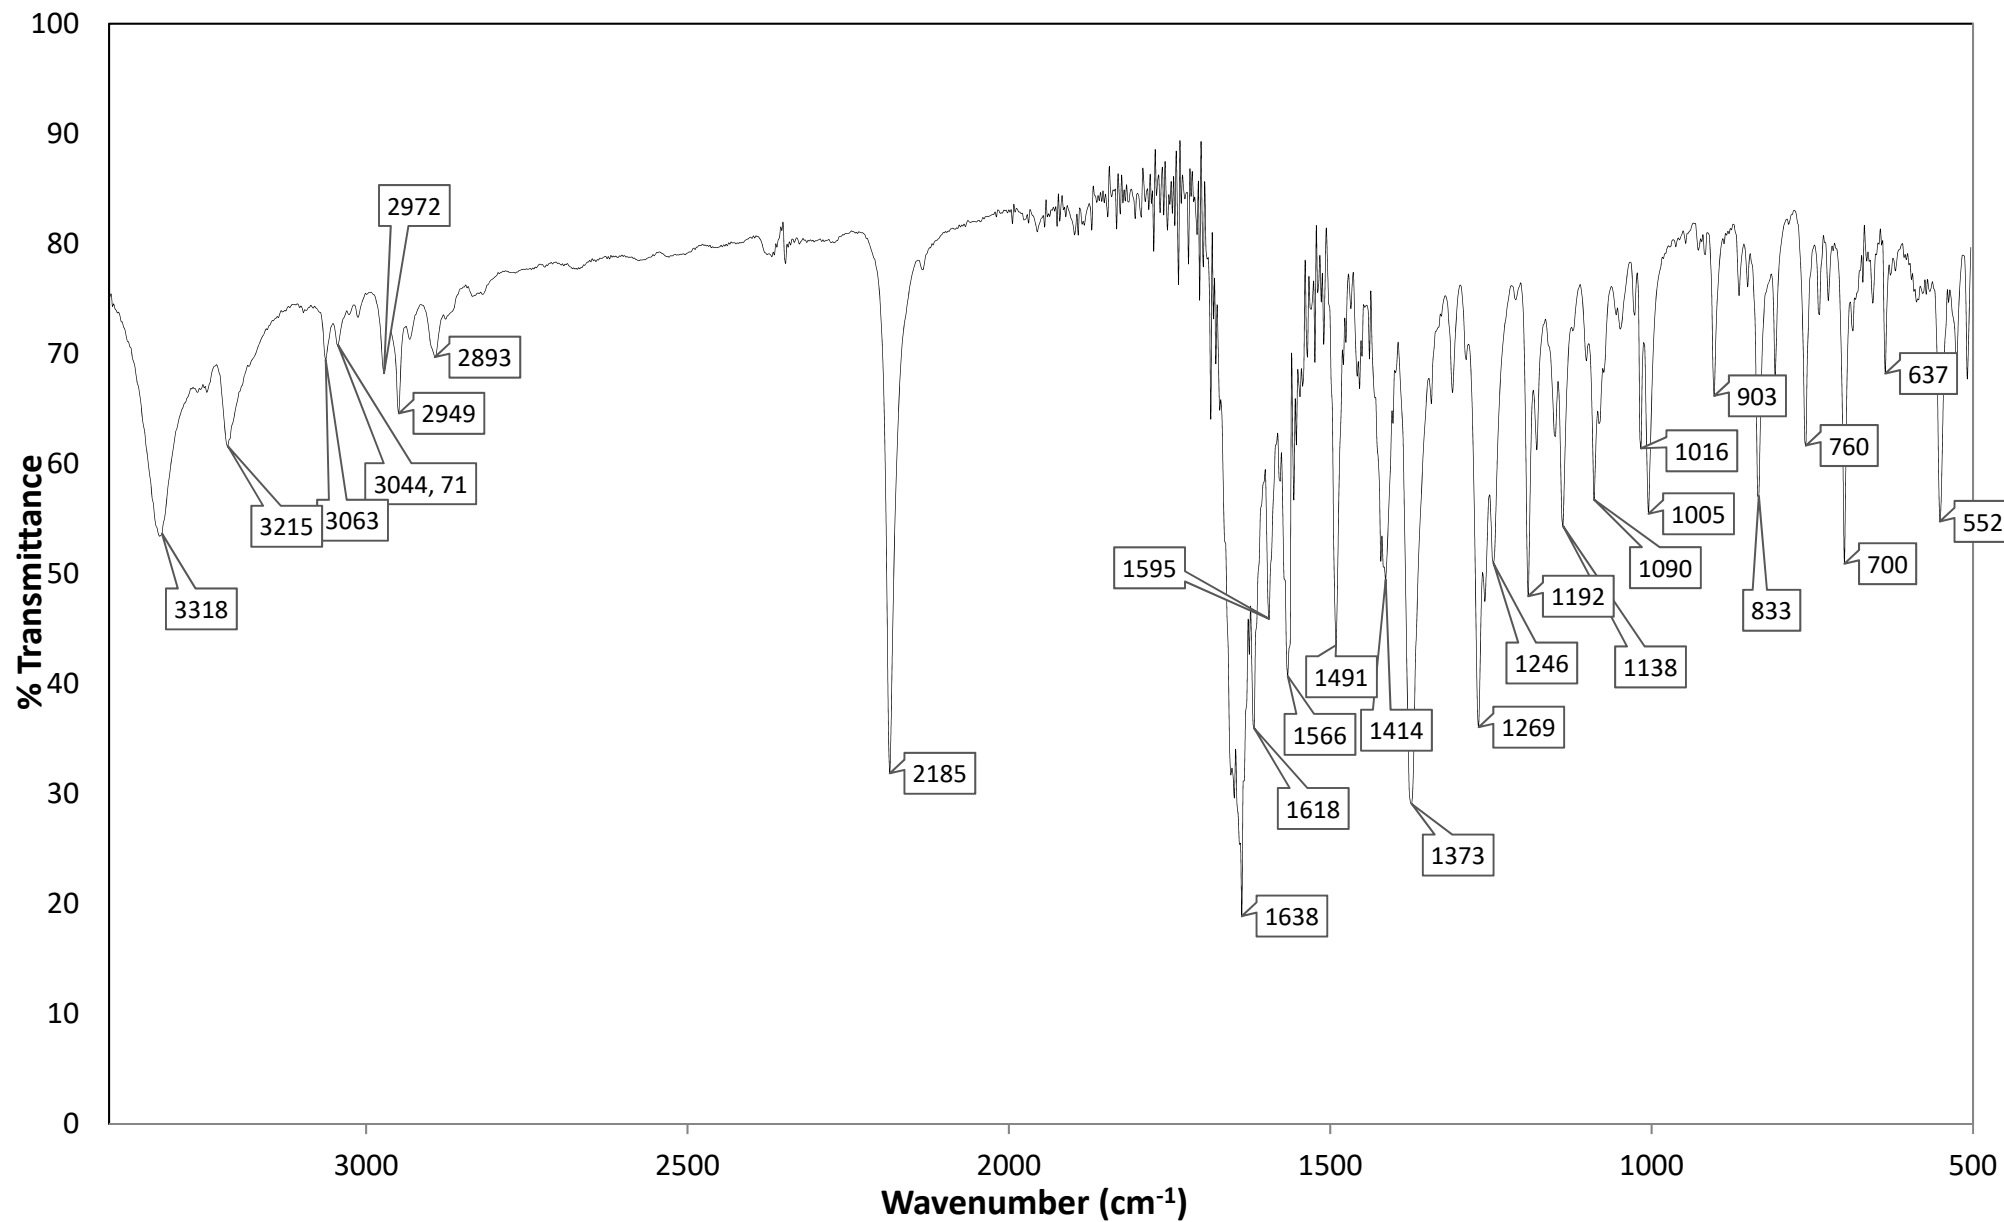

Figure S77 – IR spectrum of 5t

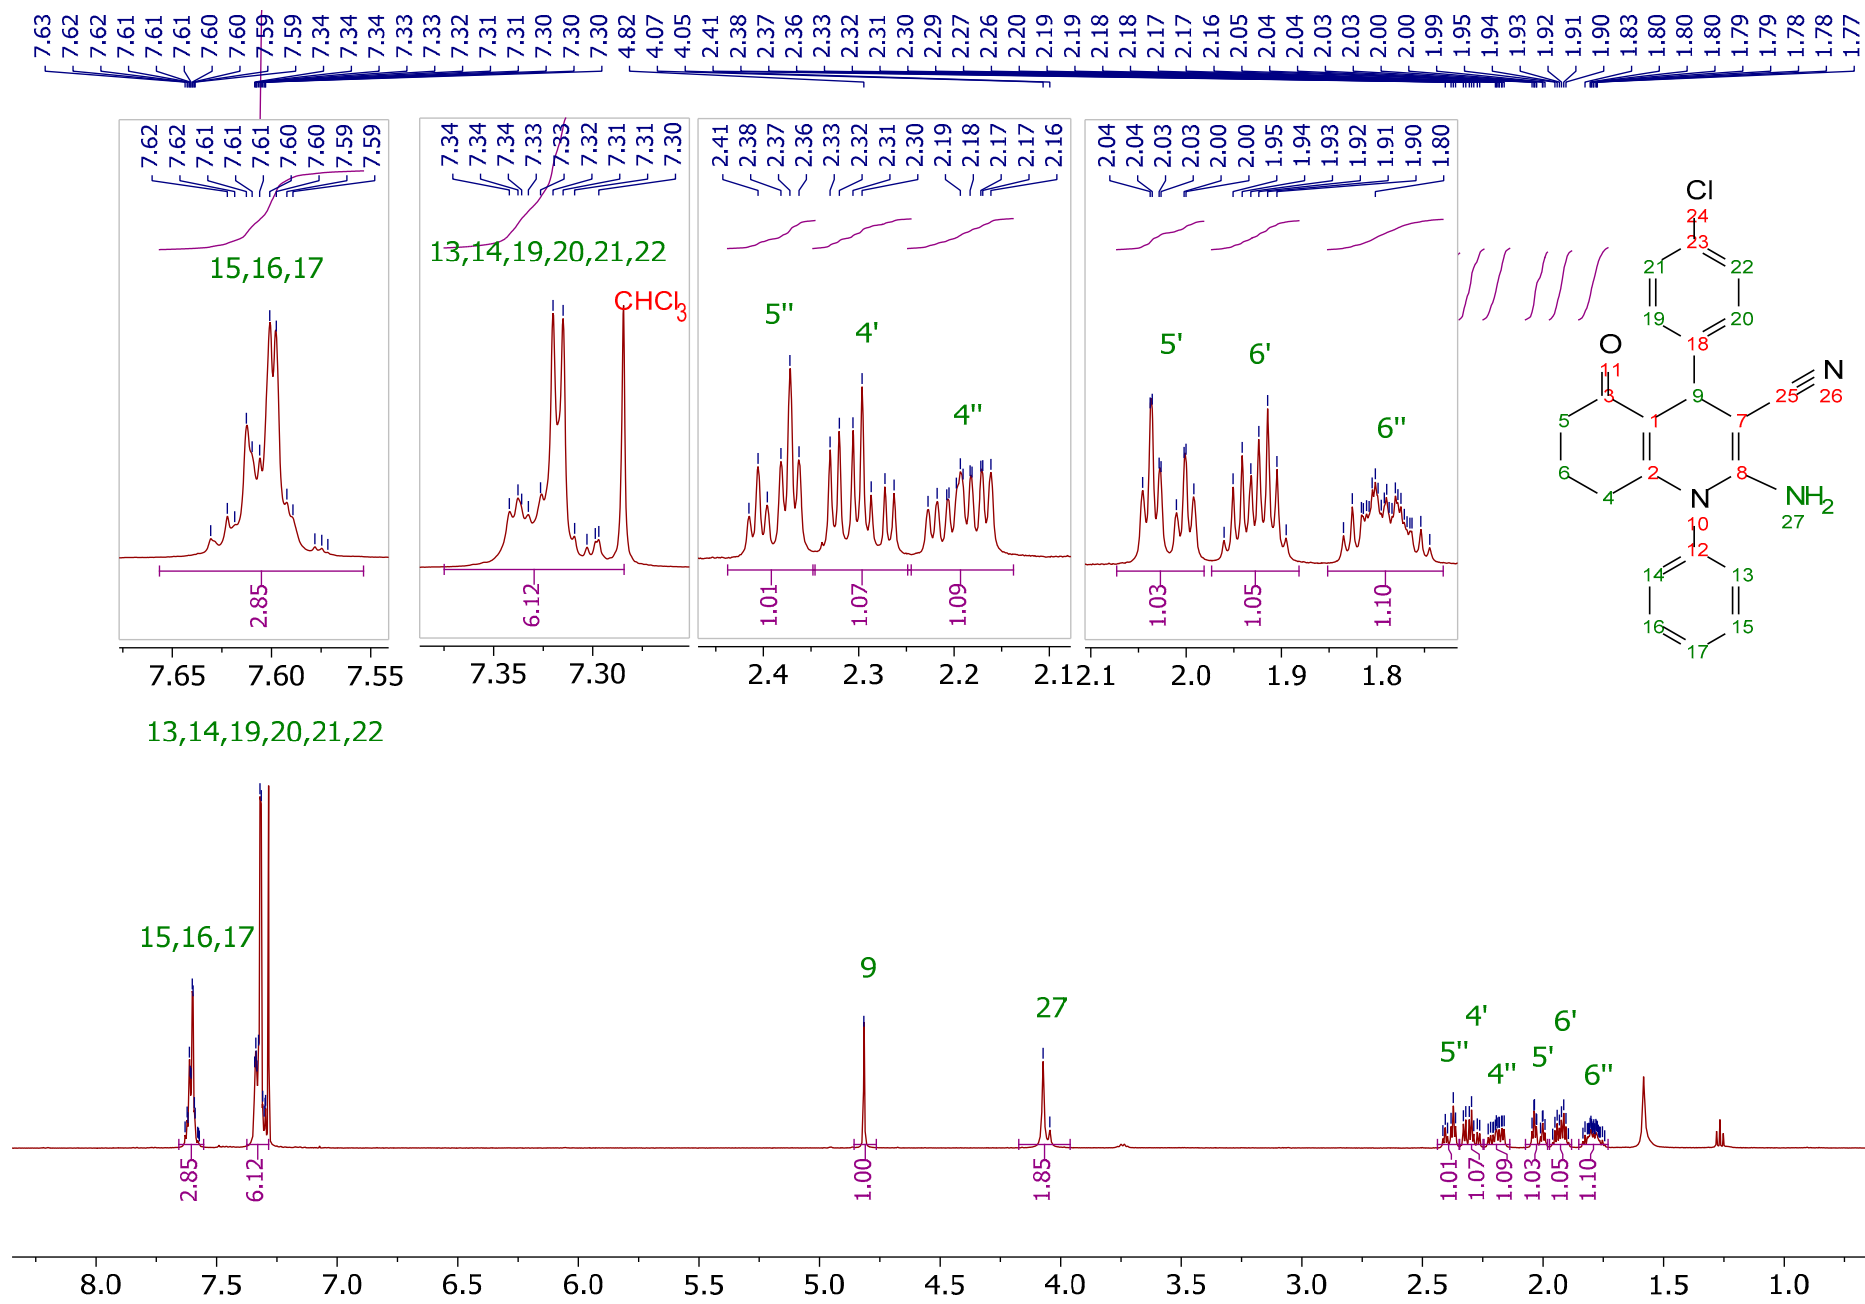

Figure S78 -  $^1\text{H}$  NMR spectrum of 5t

1.20. Product carbonitrile 7a: 2'-Amino-7',7'-dimethyl-2,5'-dioxo-1'-phenyl-5',6',7',8'-tetrahydro-1H-spiro[indoline-3,4'-quinoline]-3'-

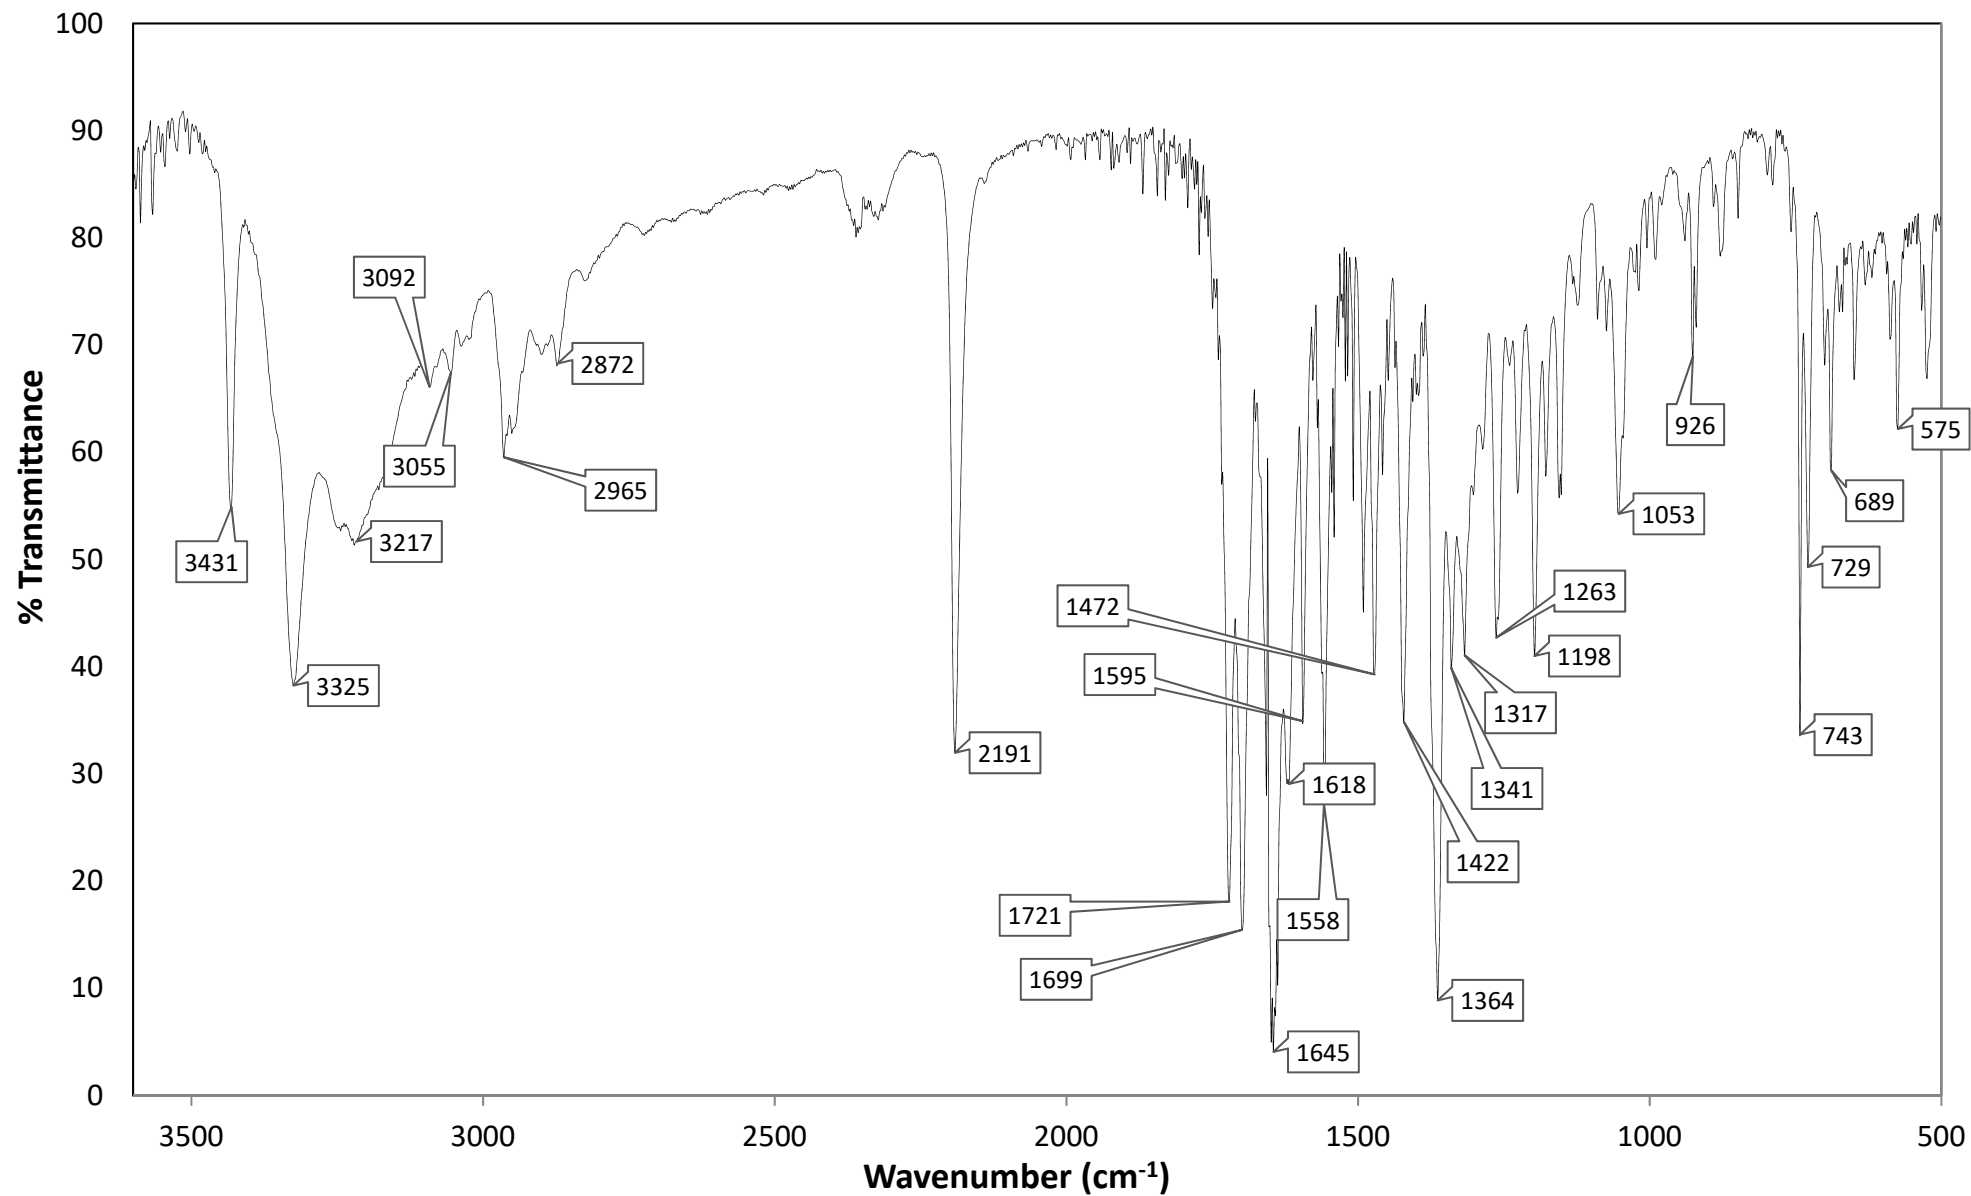

Figure S79 - IR spectrum of 7a

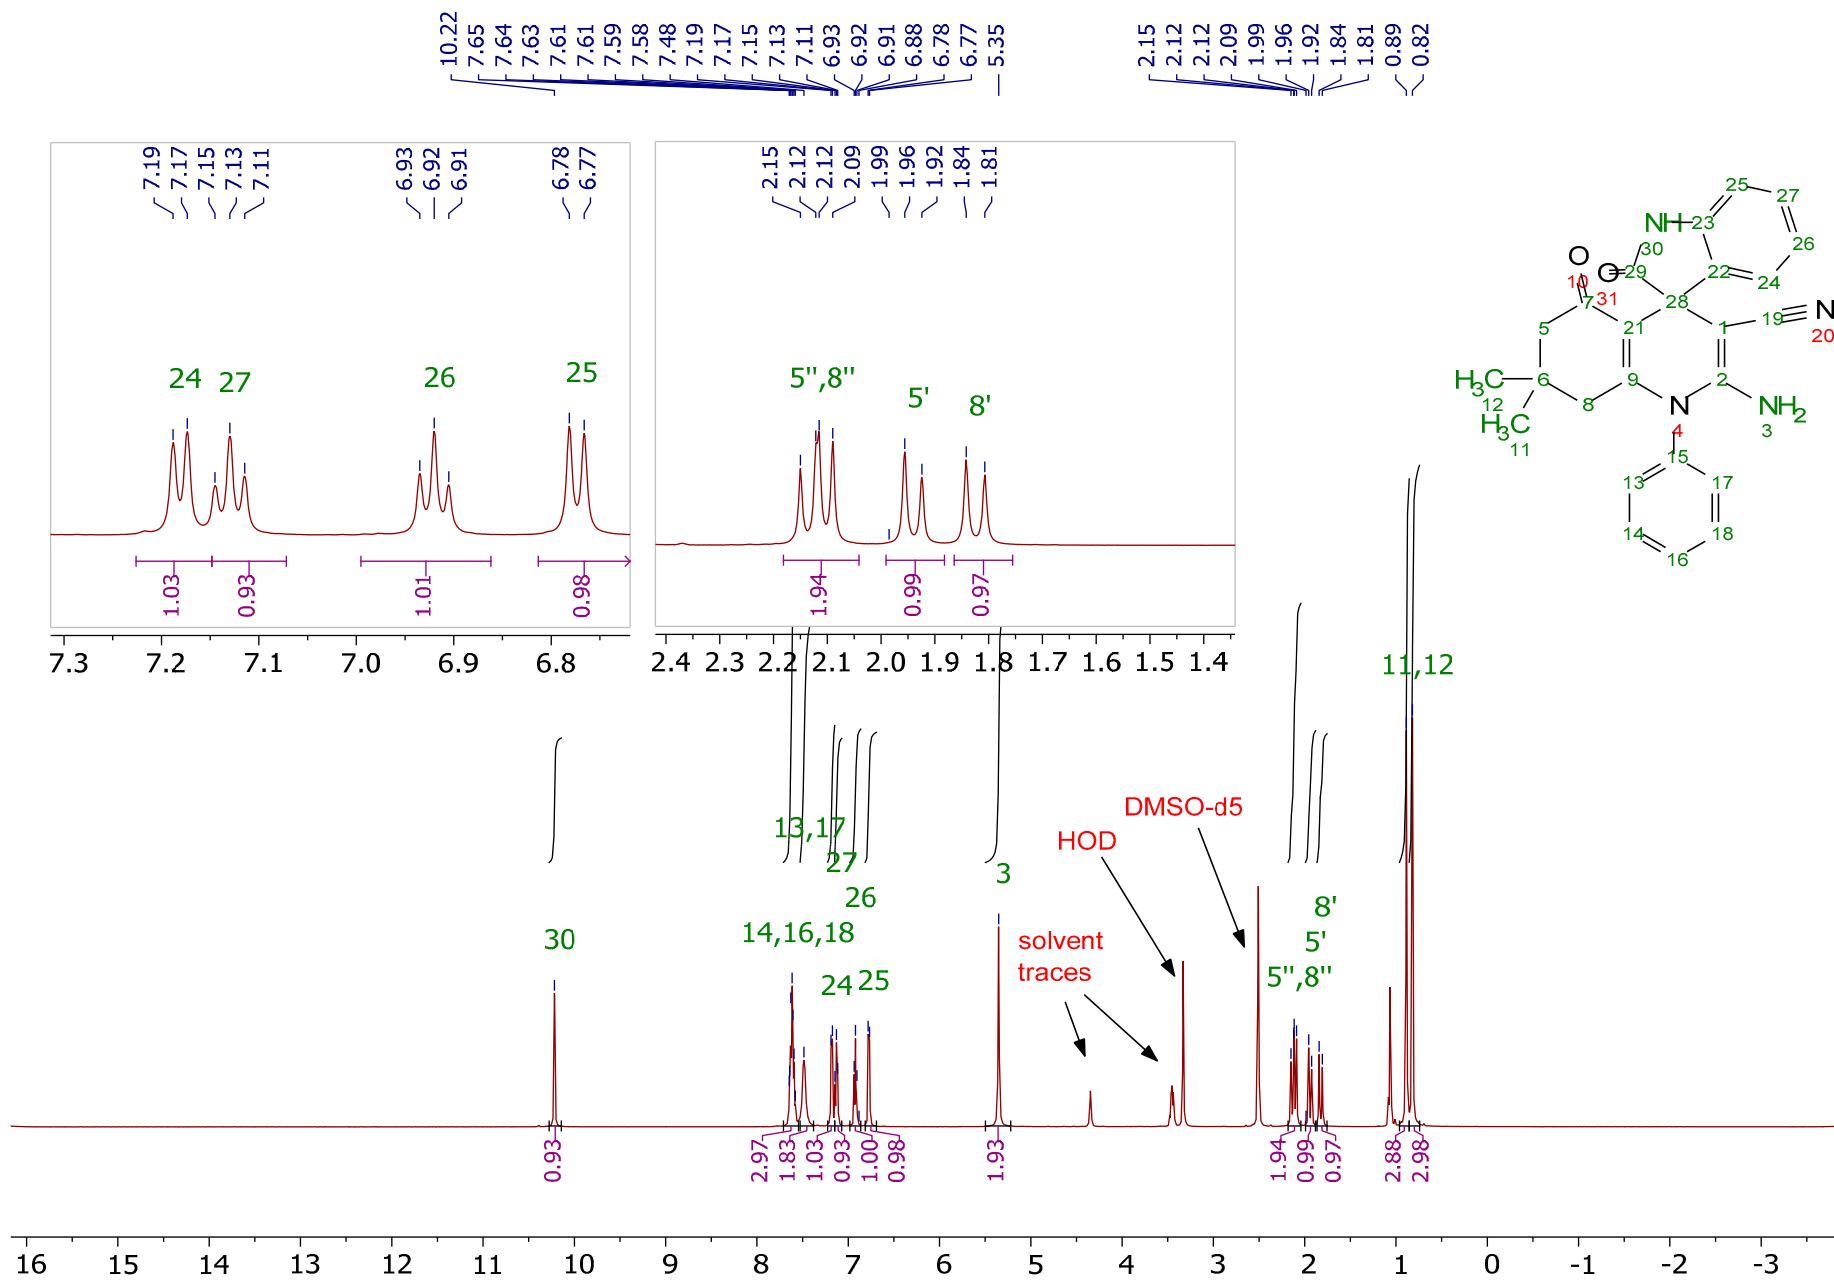

Figure S80 - <sup>1</sup>H NMR spectrum of 7a

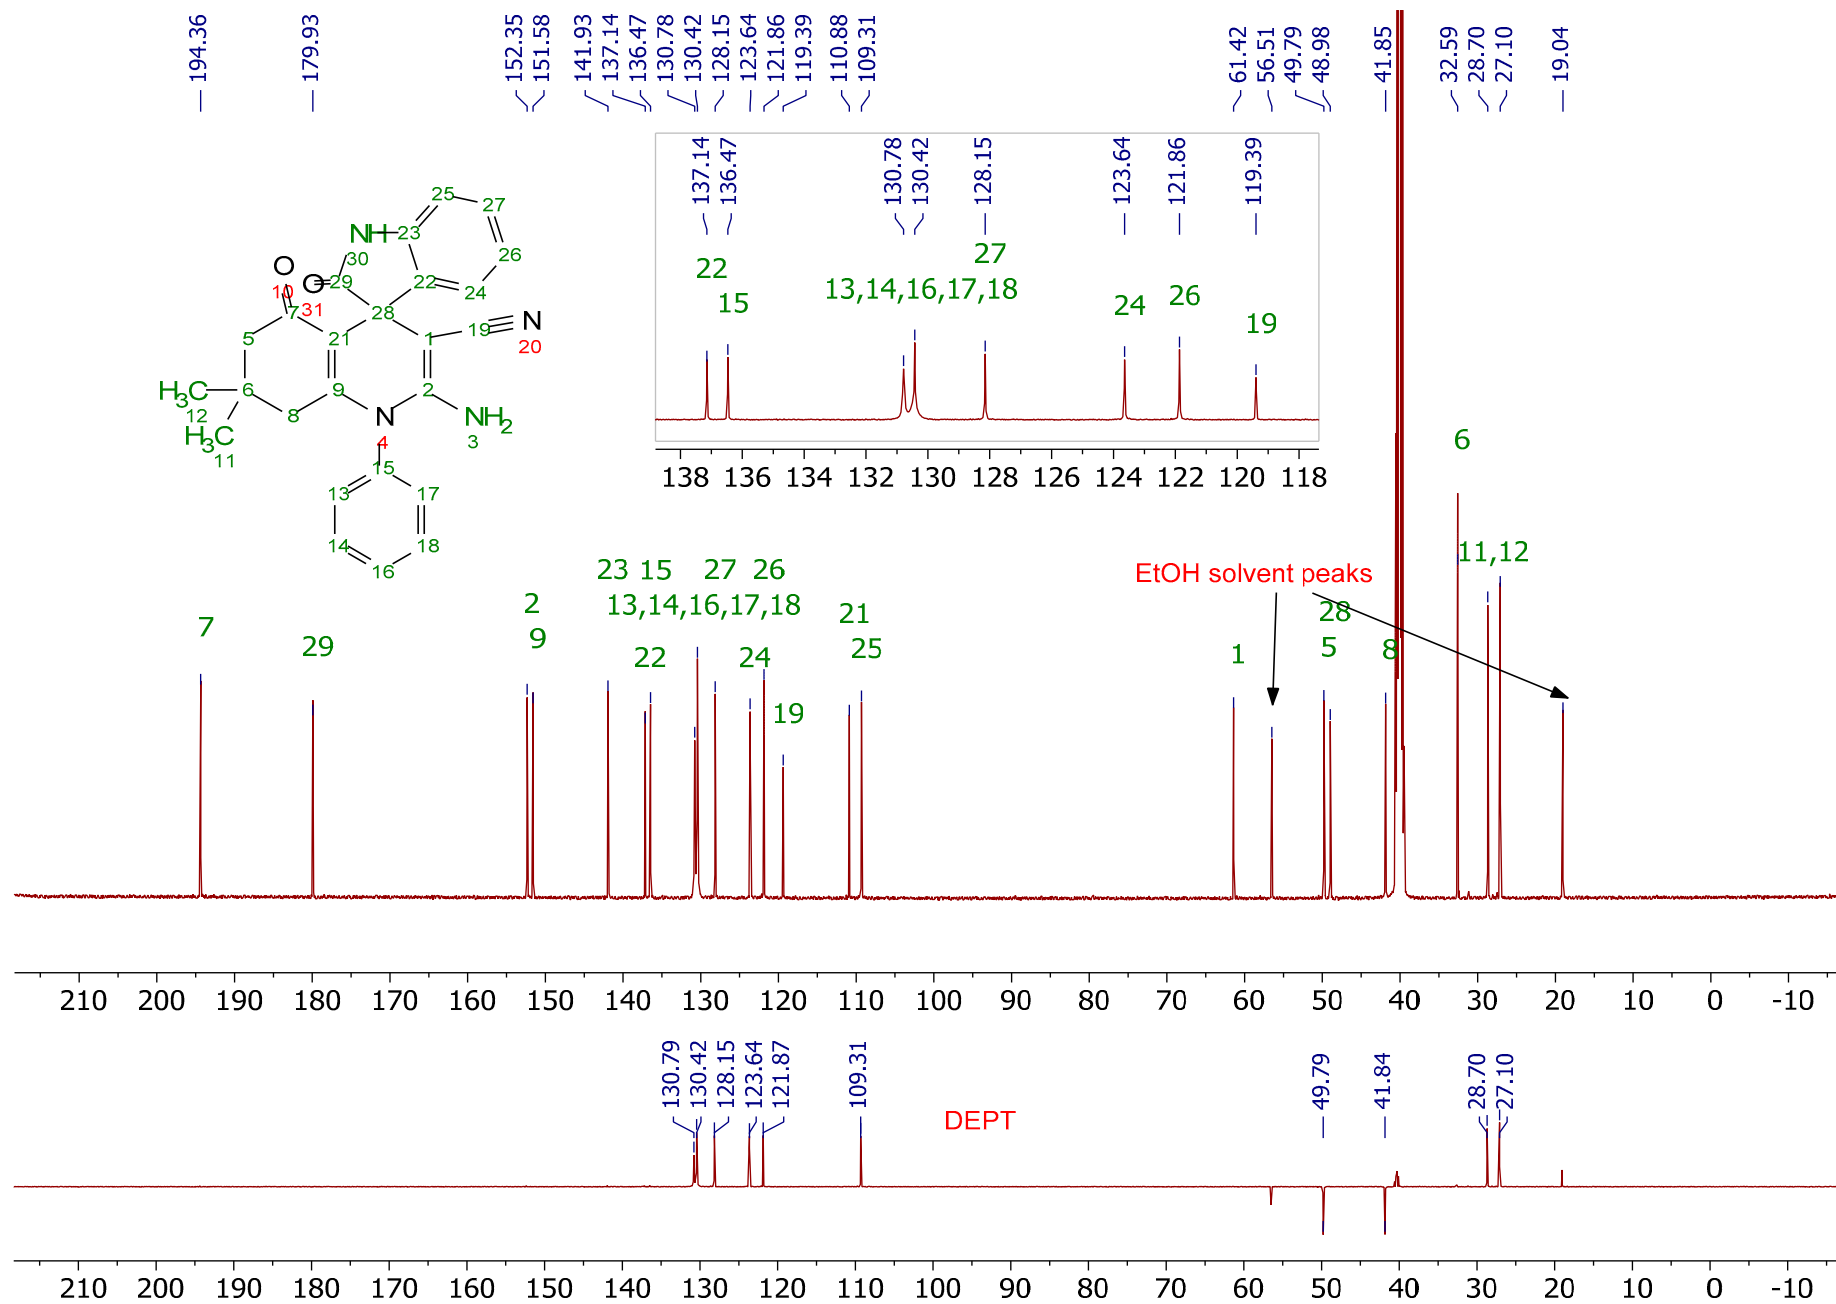

Figure S81 - <sup>13</sup>C NMR and DEPT spectra of 7a



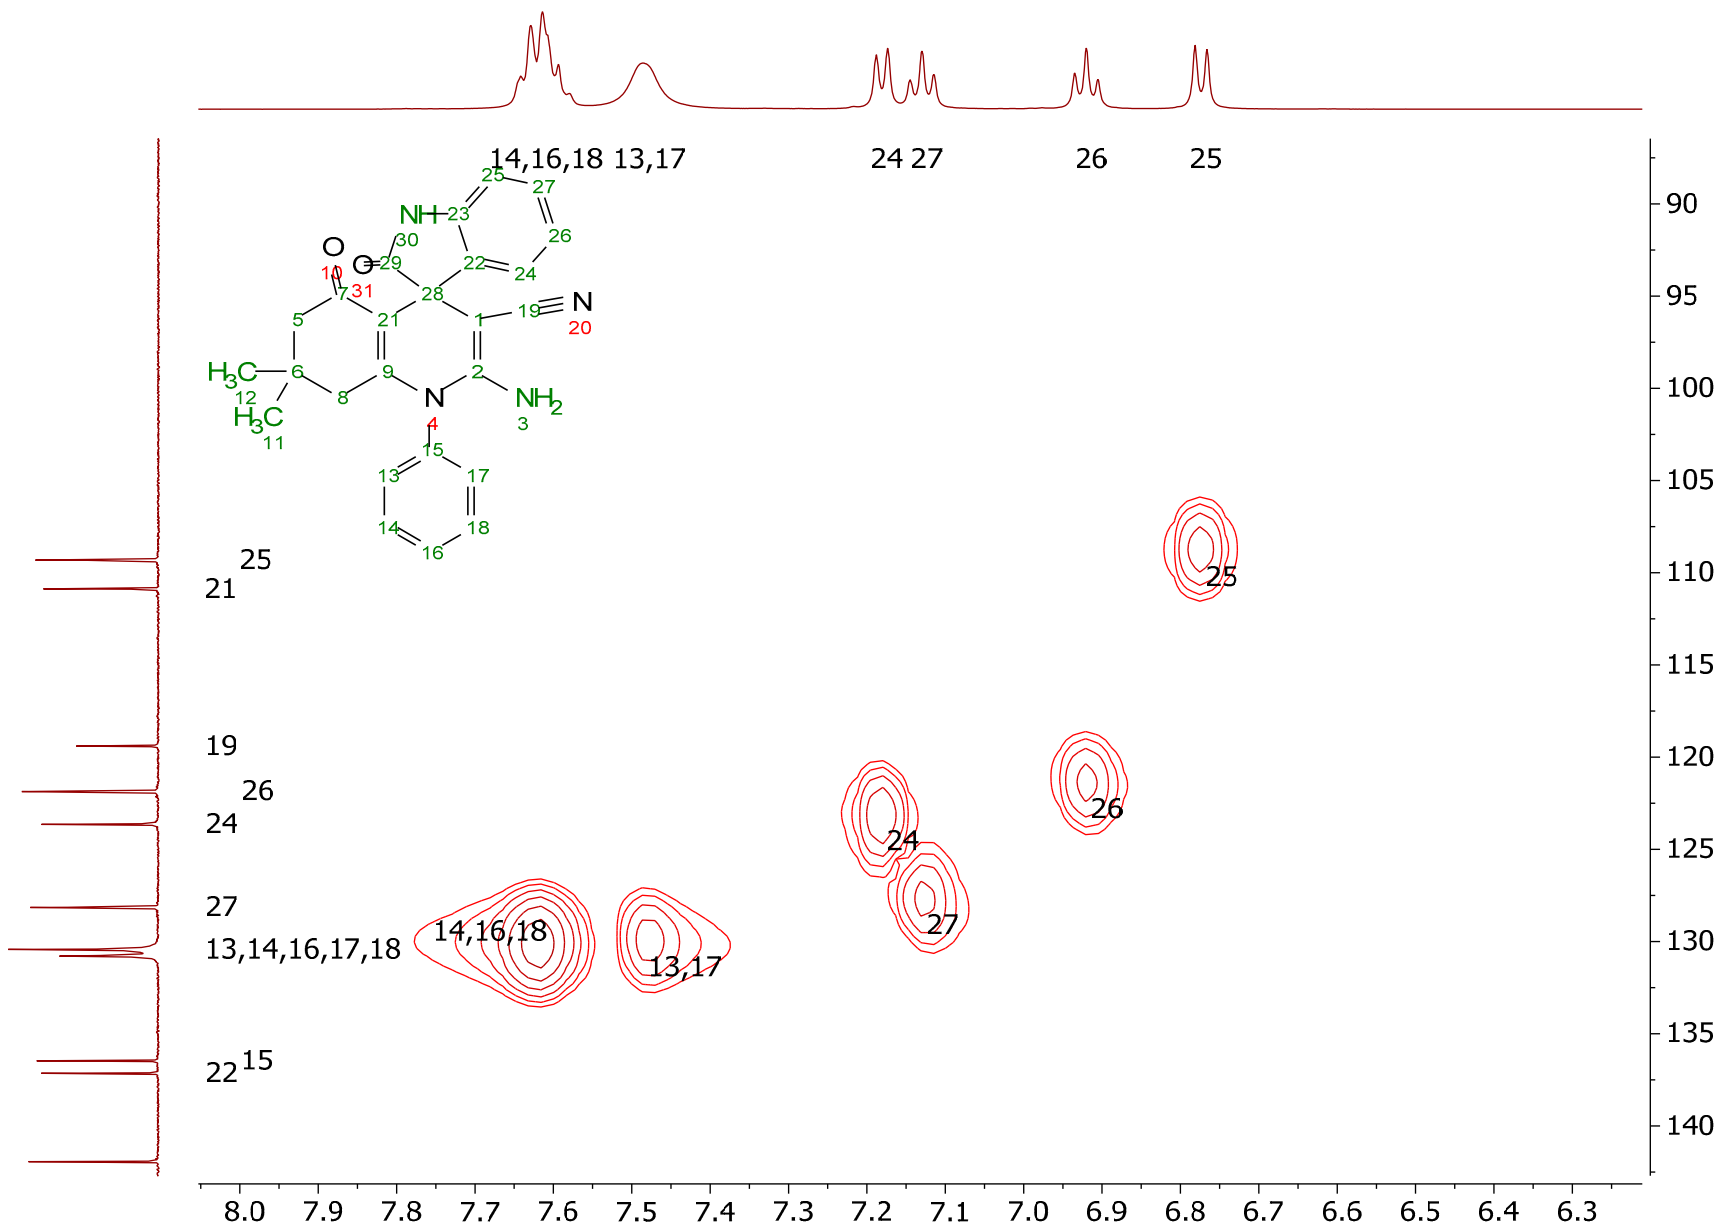

Figure S82 - HSQC spectrum of 7a

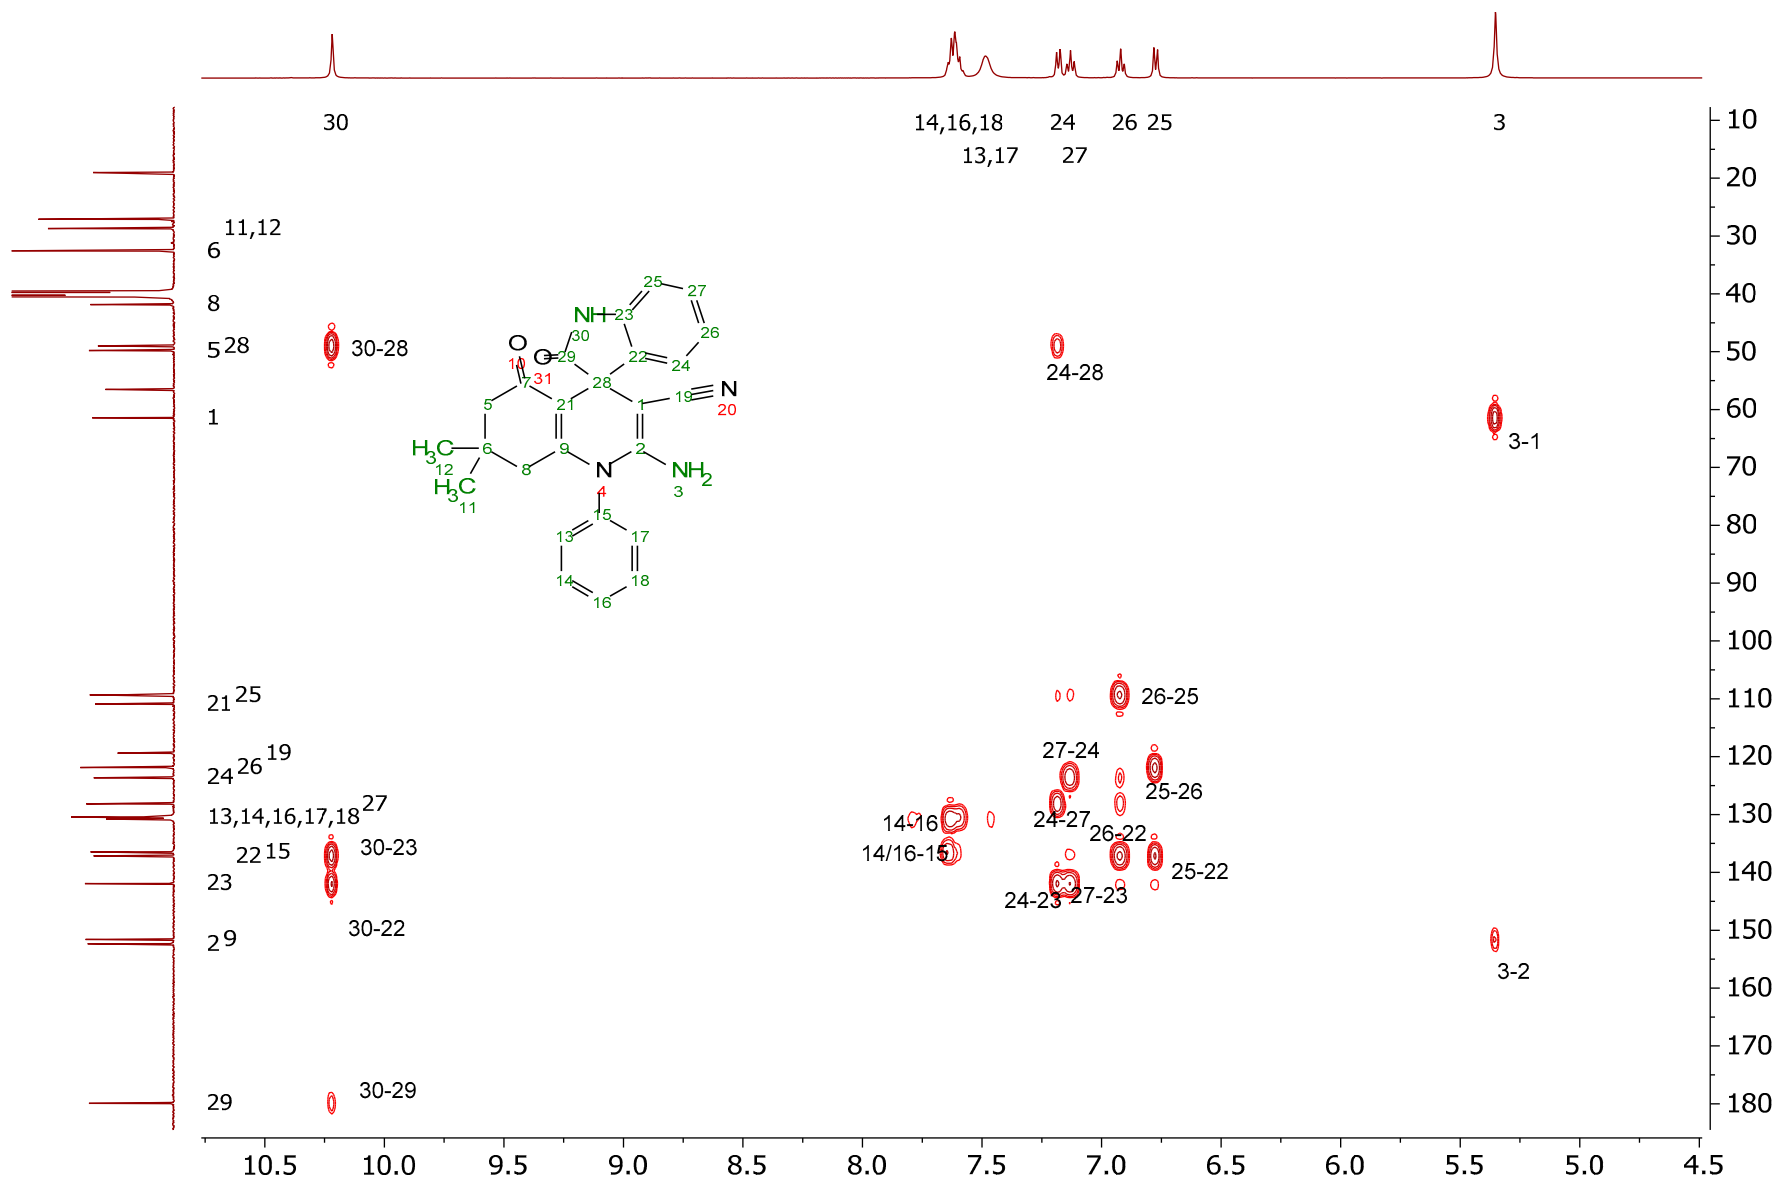

Figure S83 - Downfield region of HMBC spectrum of 7a

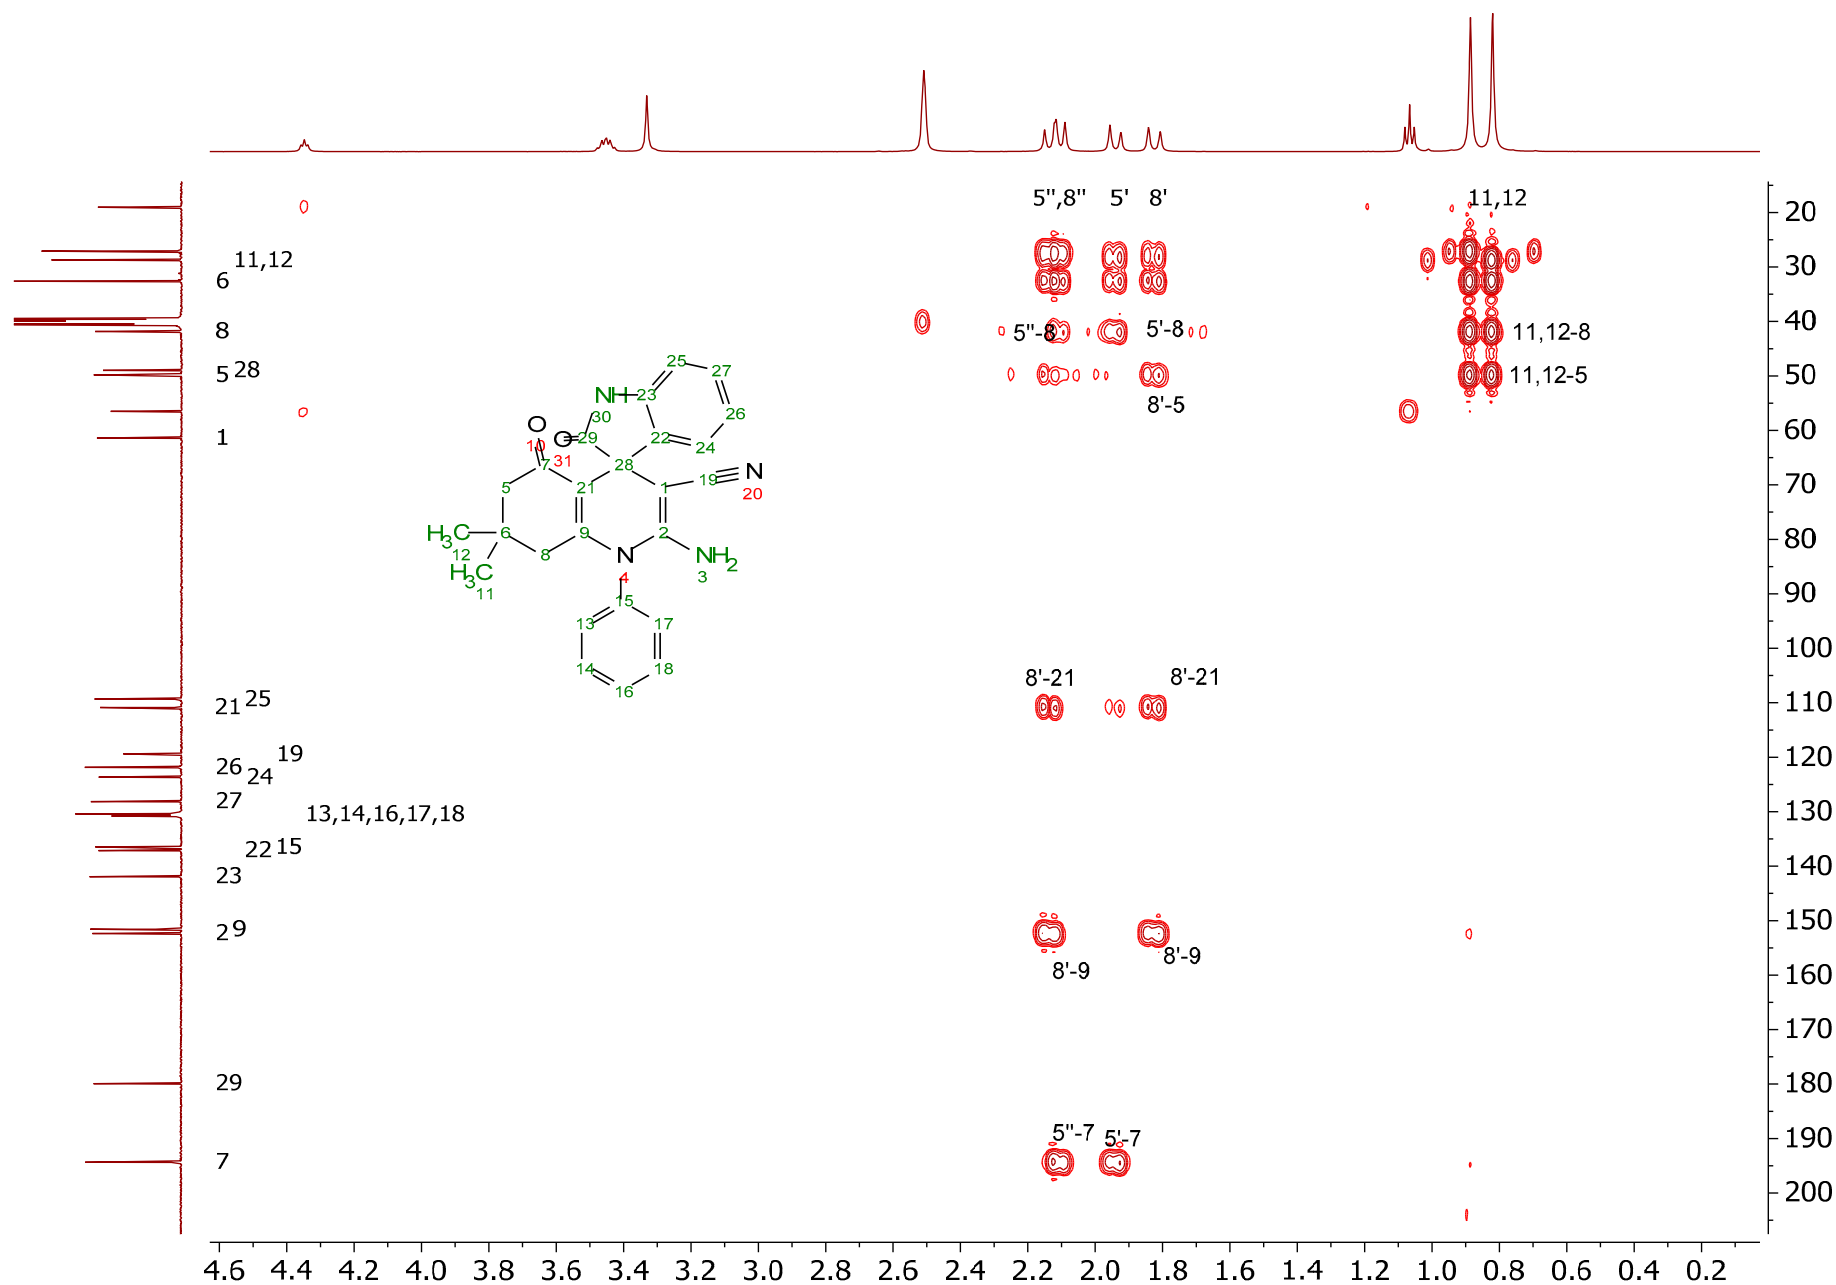

Figure S84 - Upfield region of HMBC spectrum of 7a

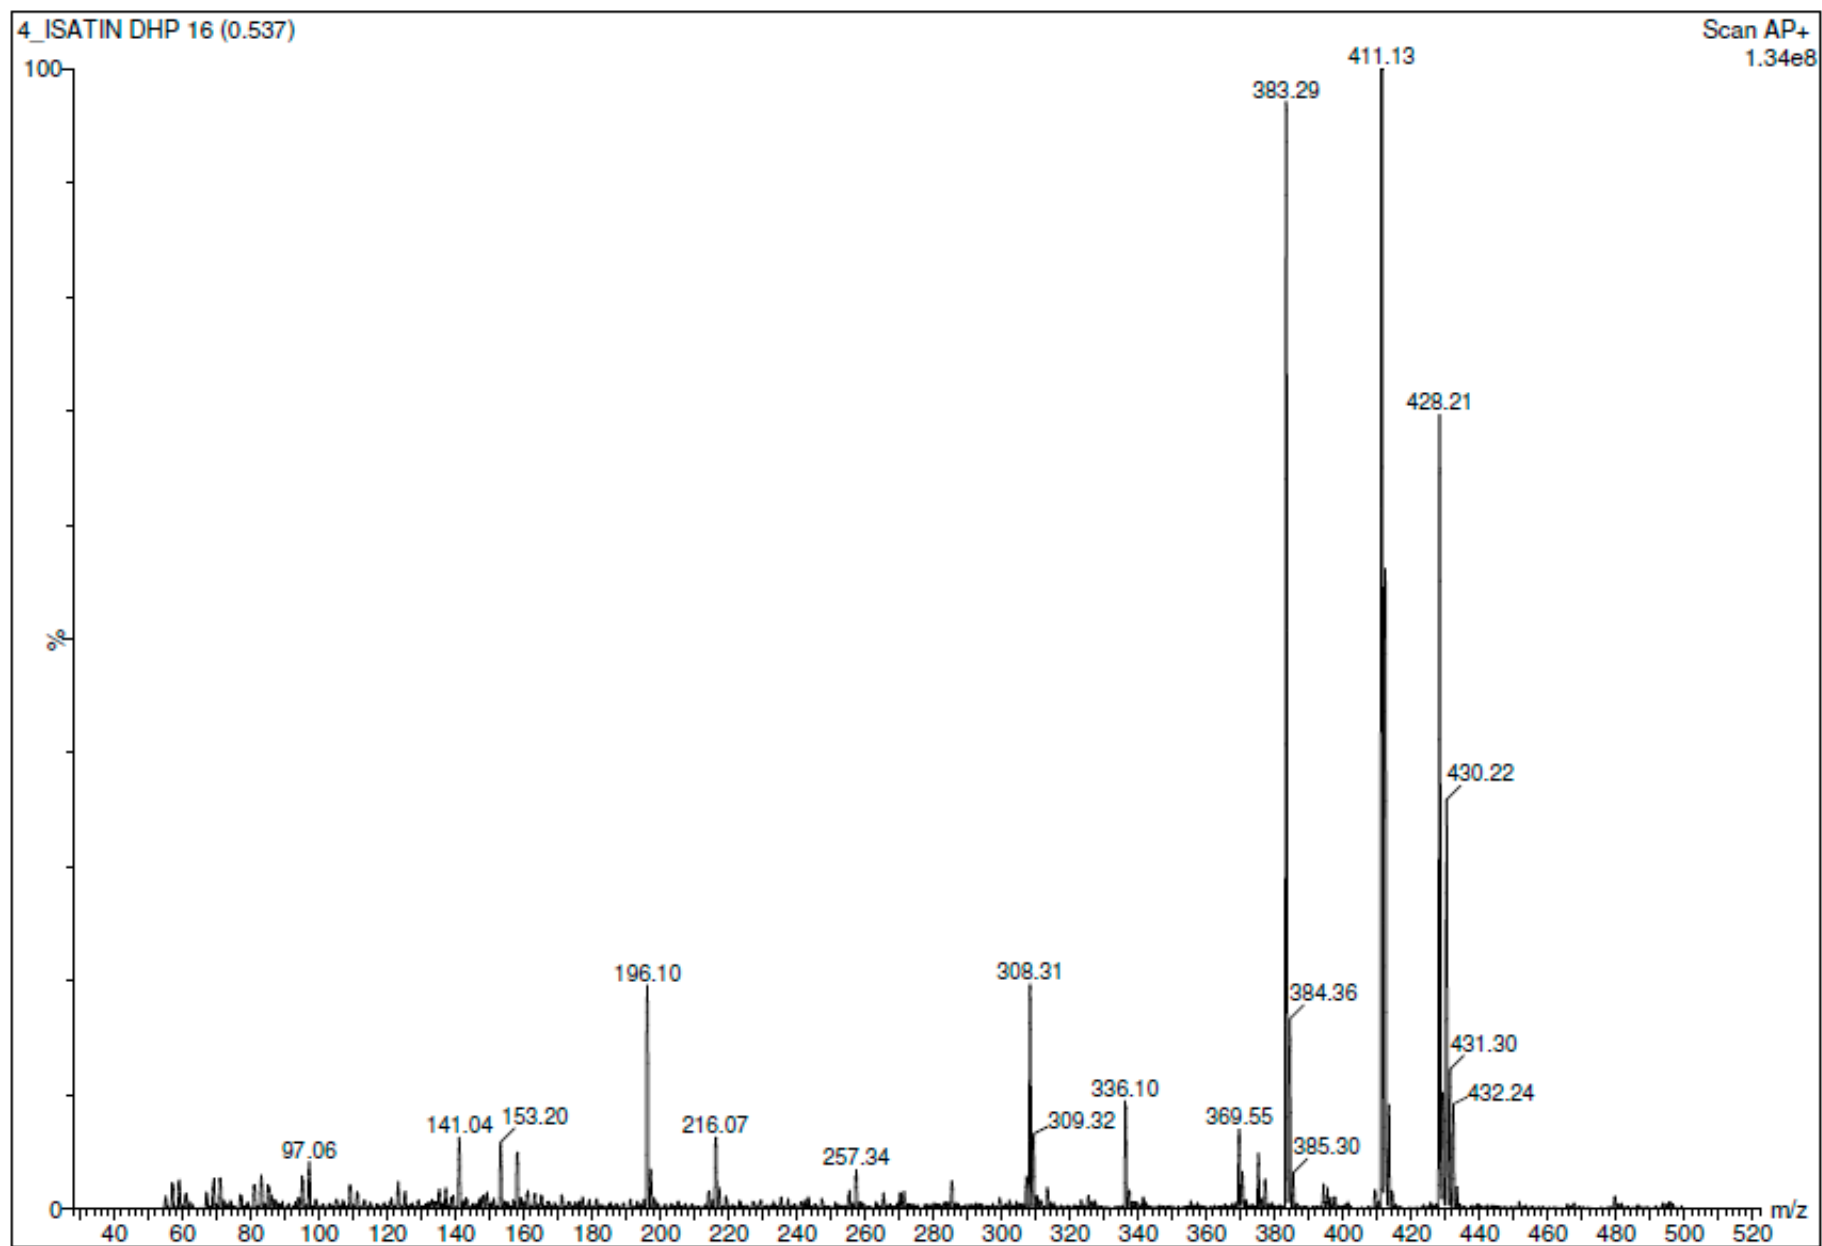

Figure S85 - MS spectrum of 7a

Table S10 - Peaks and fragmentation positions for MS spectrum of 7a

| <u>m/z</u>    | <u>Fragmentation position and structure</u>                                                                                                                                                |
|---------------|--------------------------------------------------------------------------------------------------------------------------------------------------------------------------------------------|
| <b>428.21</b> | $[M+H_2O]^+$                                                                                                                                                                               |
| <b>411.13</b> | $[M+H]^+$                                                                                                                                                                                  |
| <b>384.36</b> | 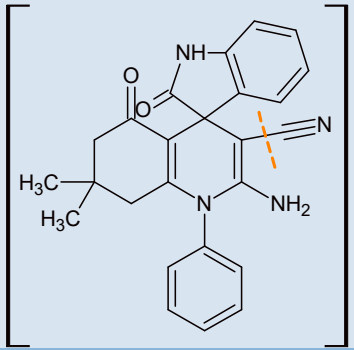 $\longrightarrow$    |
| <b>308.31</b> |  $\longrightarrow$  |

1.21. **Product 7b: 2'-Amino-7',7'-dimethyl-1'-(3-methylphenyl)-2,5'-dioxo--5',6',7',8'-tetrahydro-1*H*-spiro[indoline-3,4'-quinoline]-3'-carbonitrile**

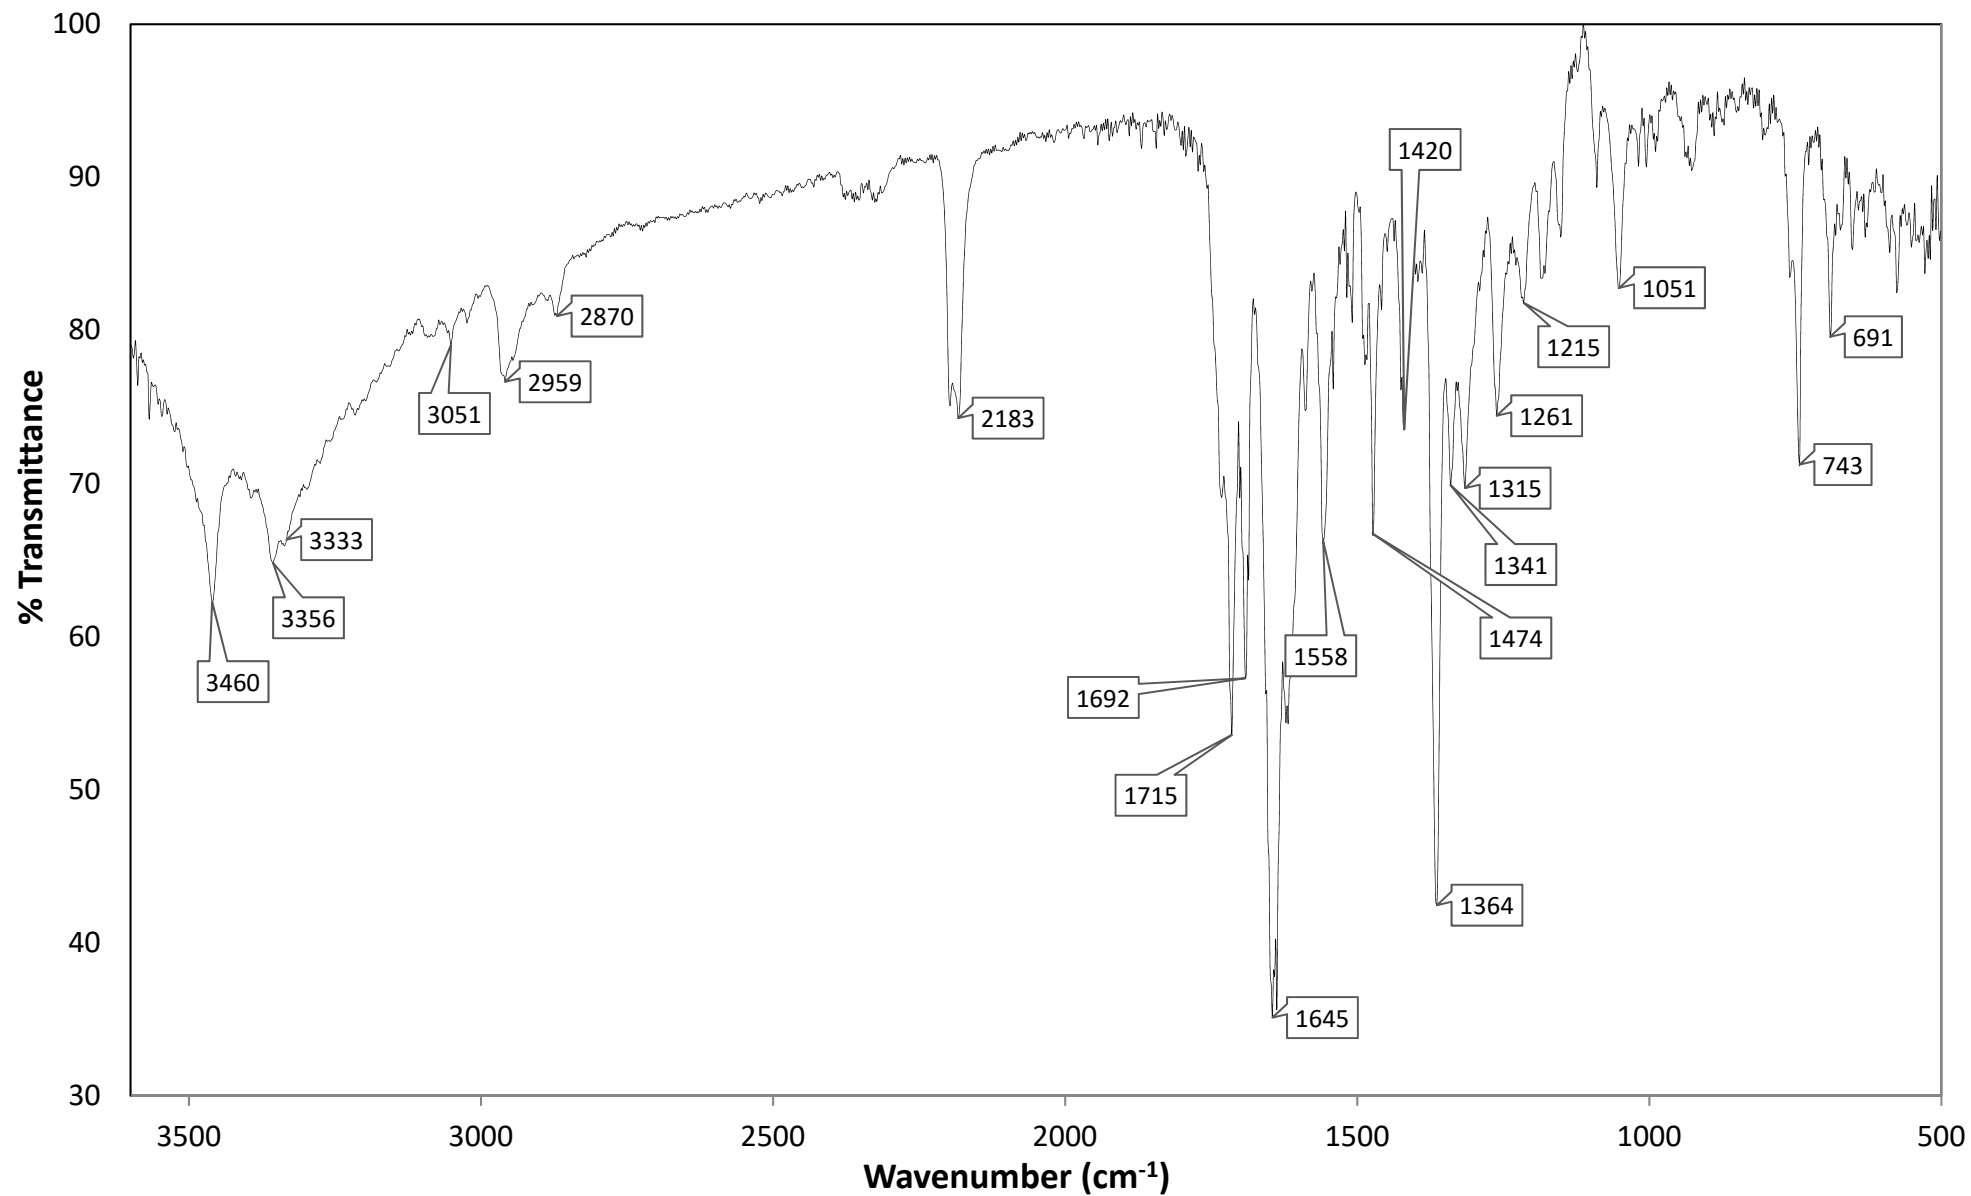

Figure S86 - IR spectrum of 7b

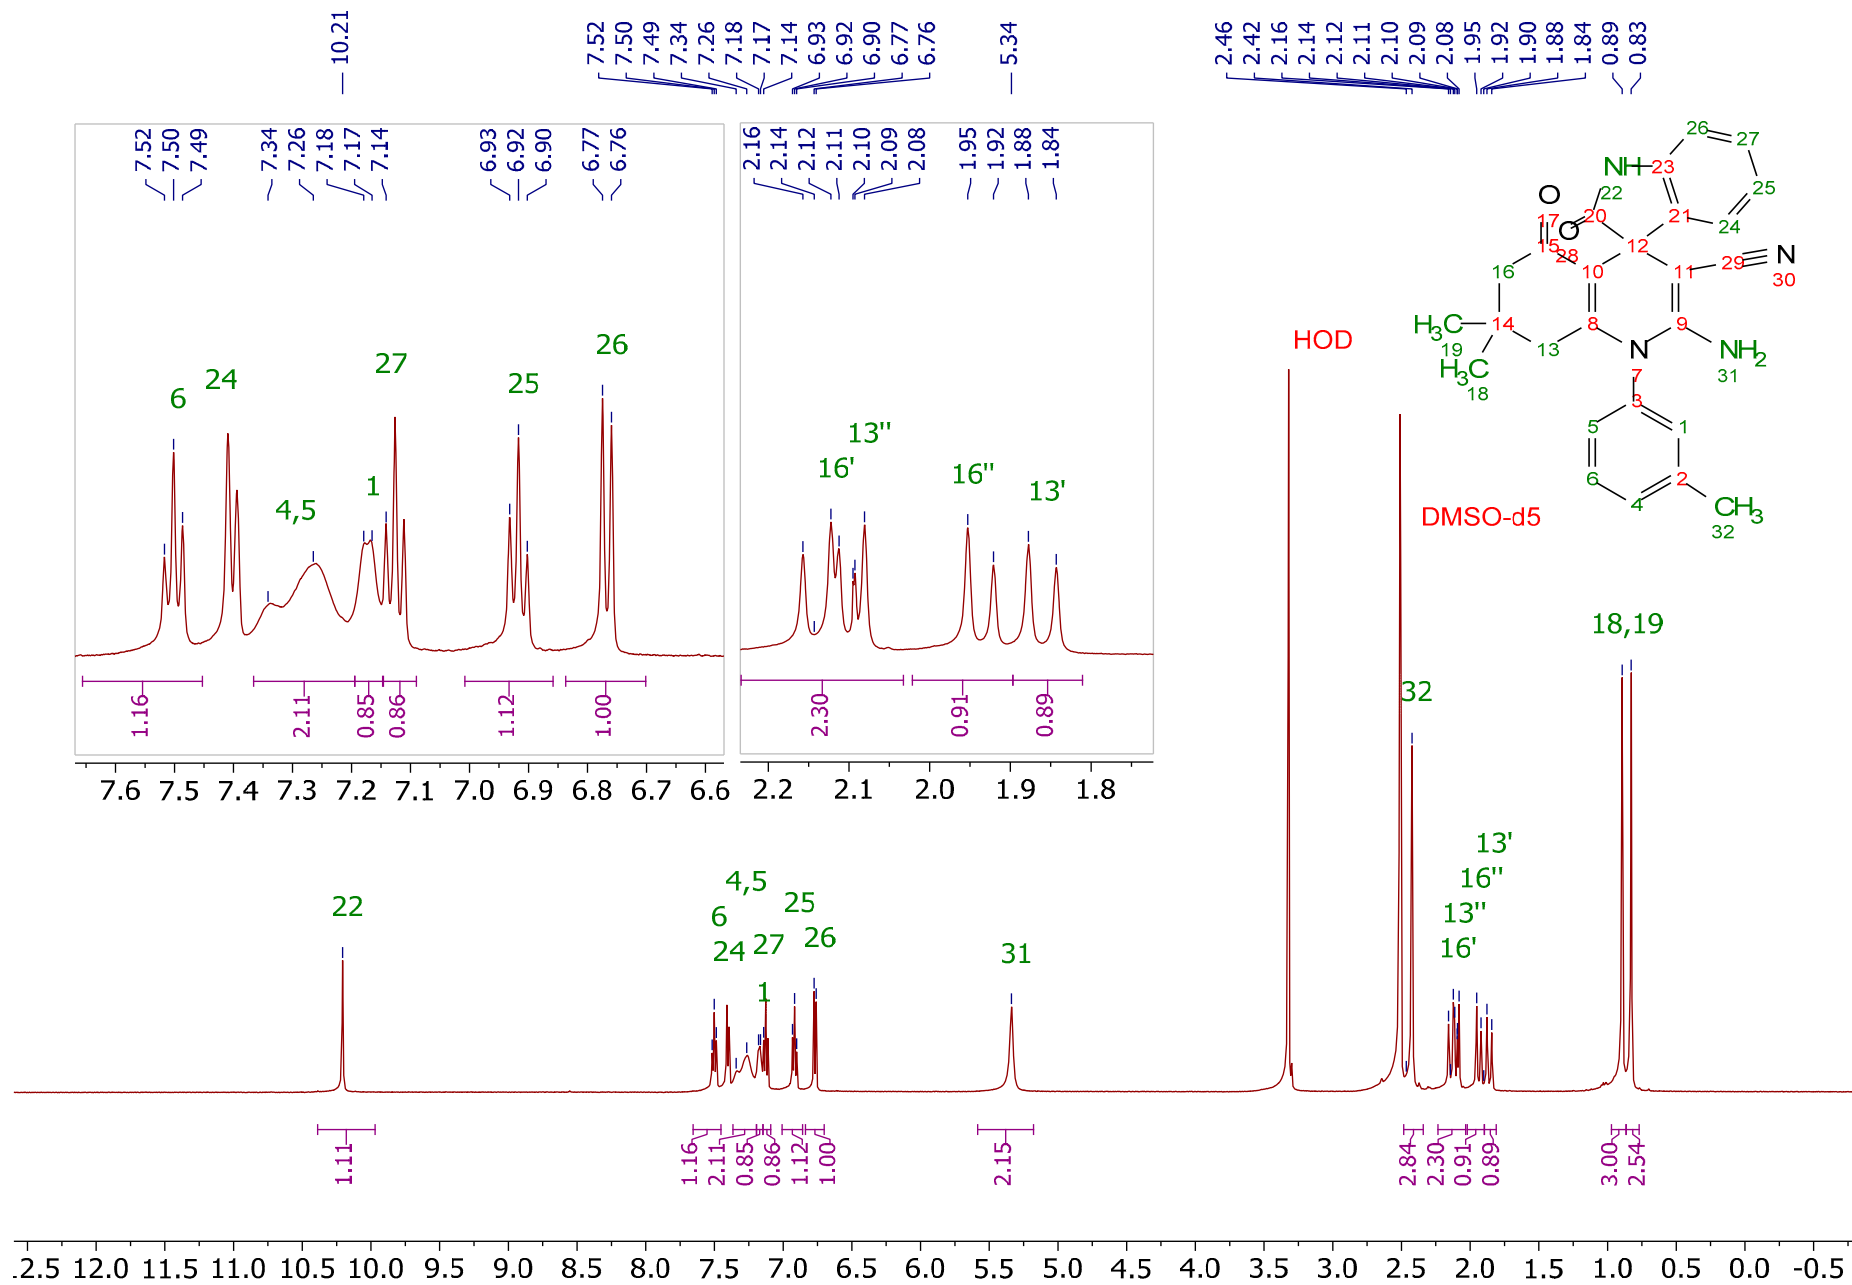

Figure S87 - <sup>1</sup>H NMR spectrum of 7b

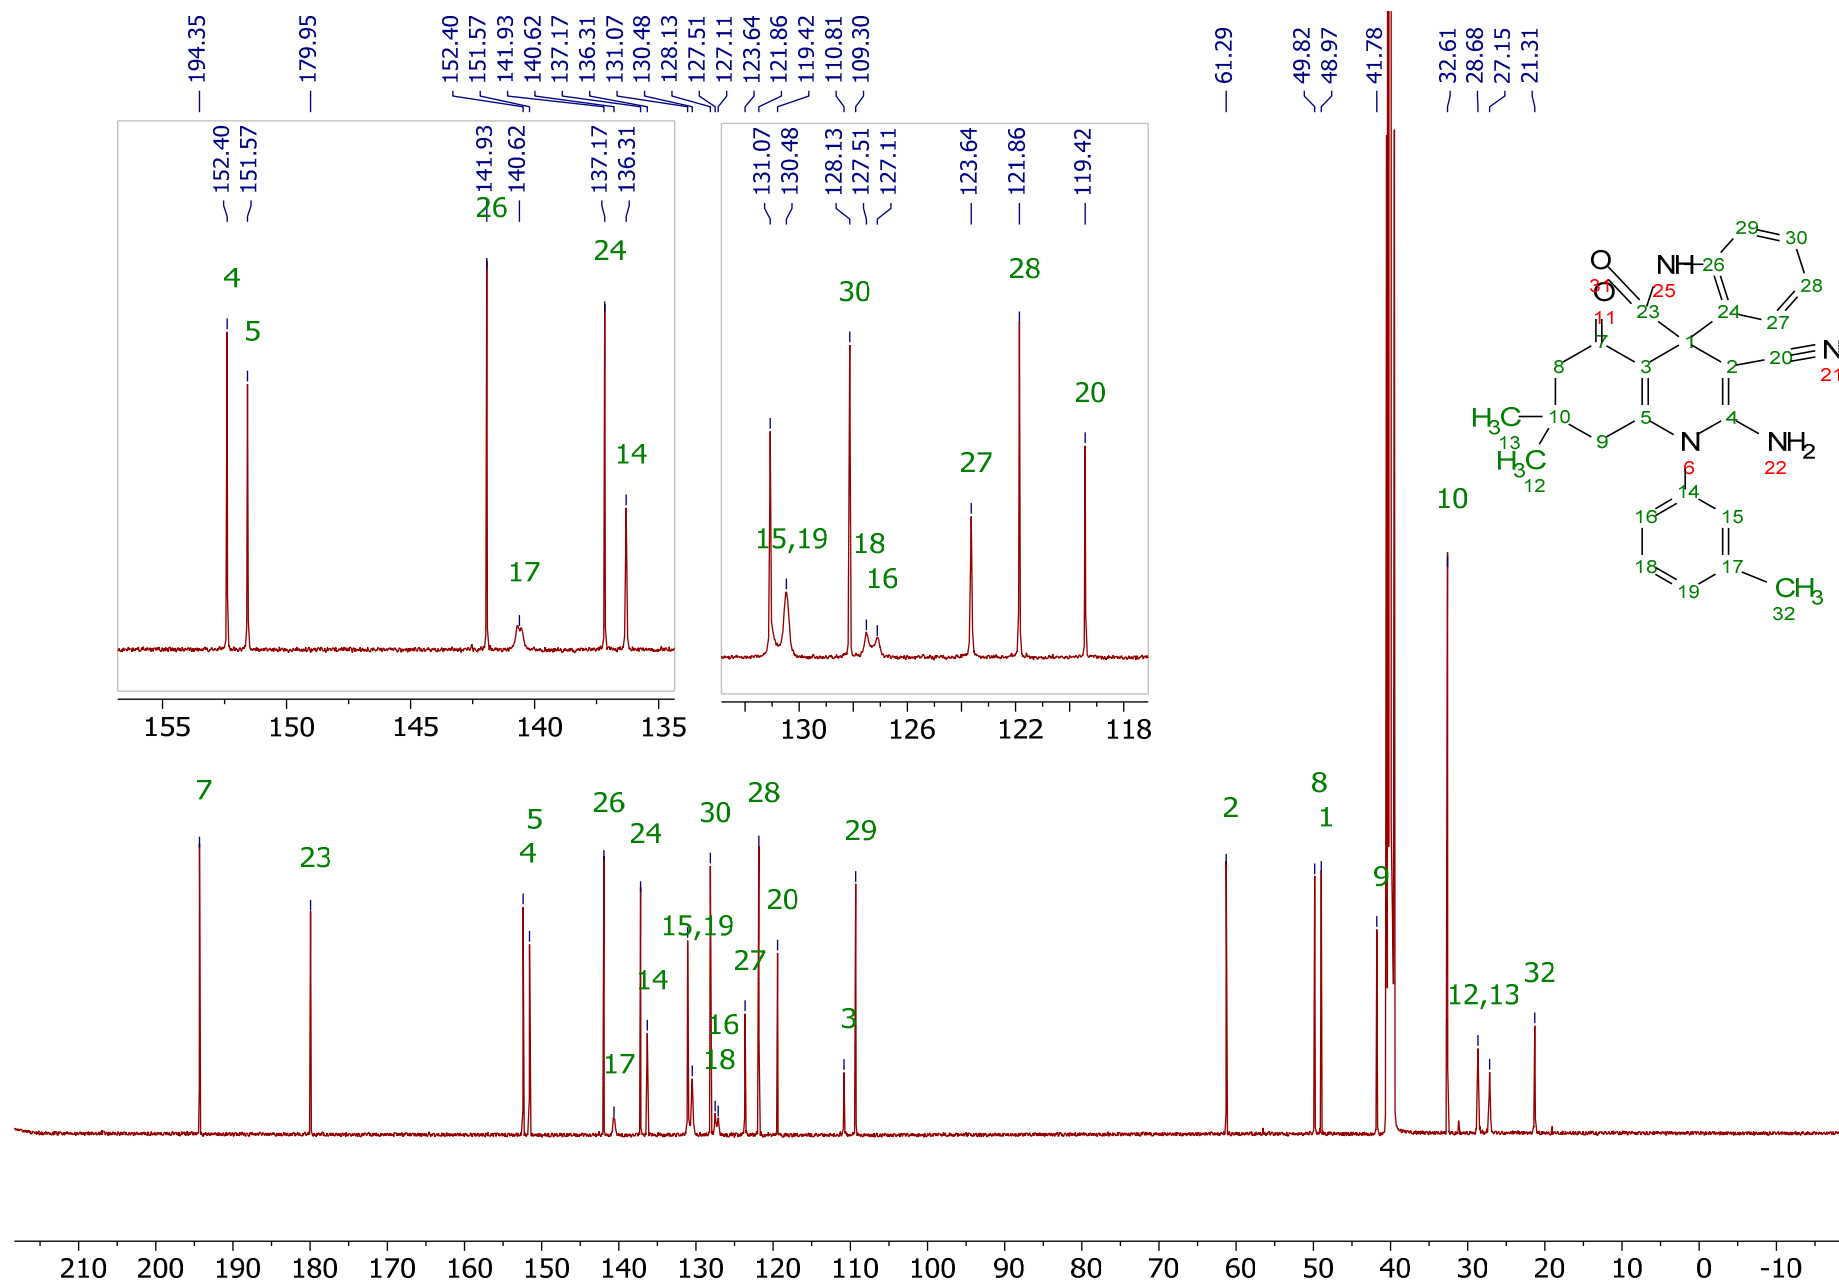

Figure S88 -  $^{13}\text{C}$  NMR spectrum of 7b



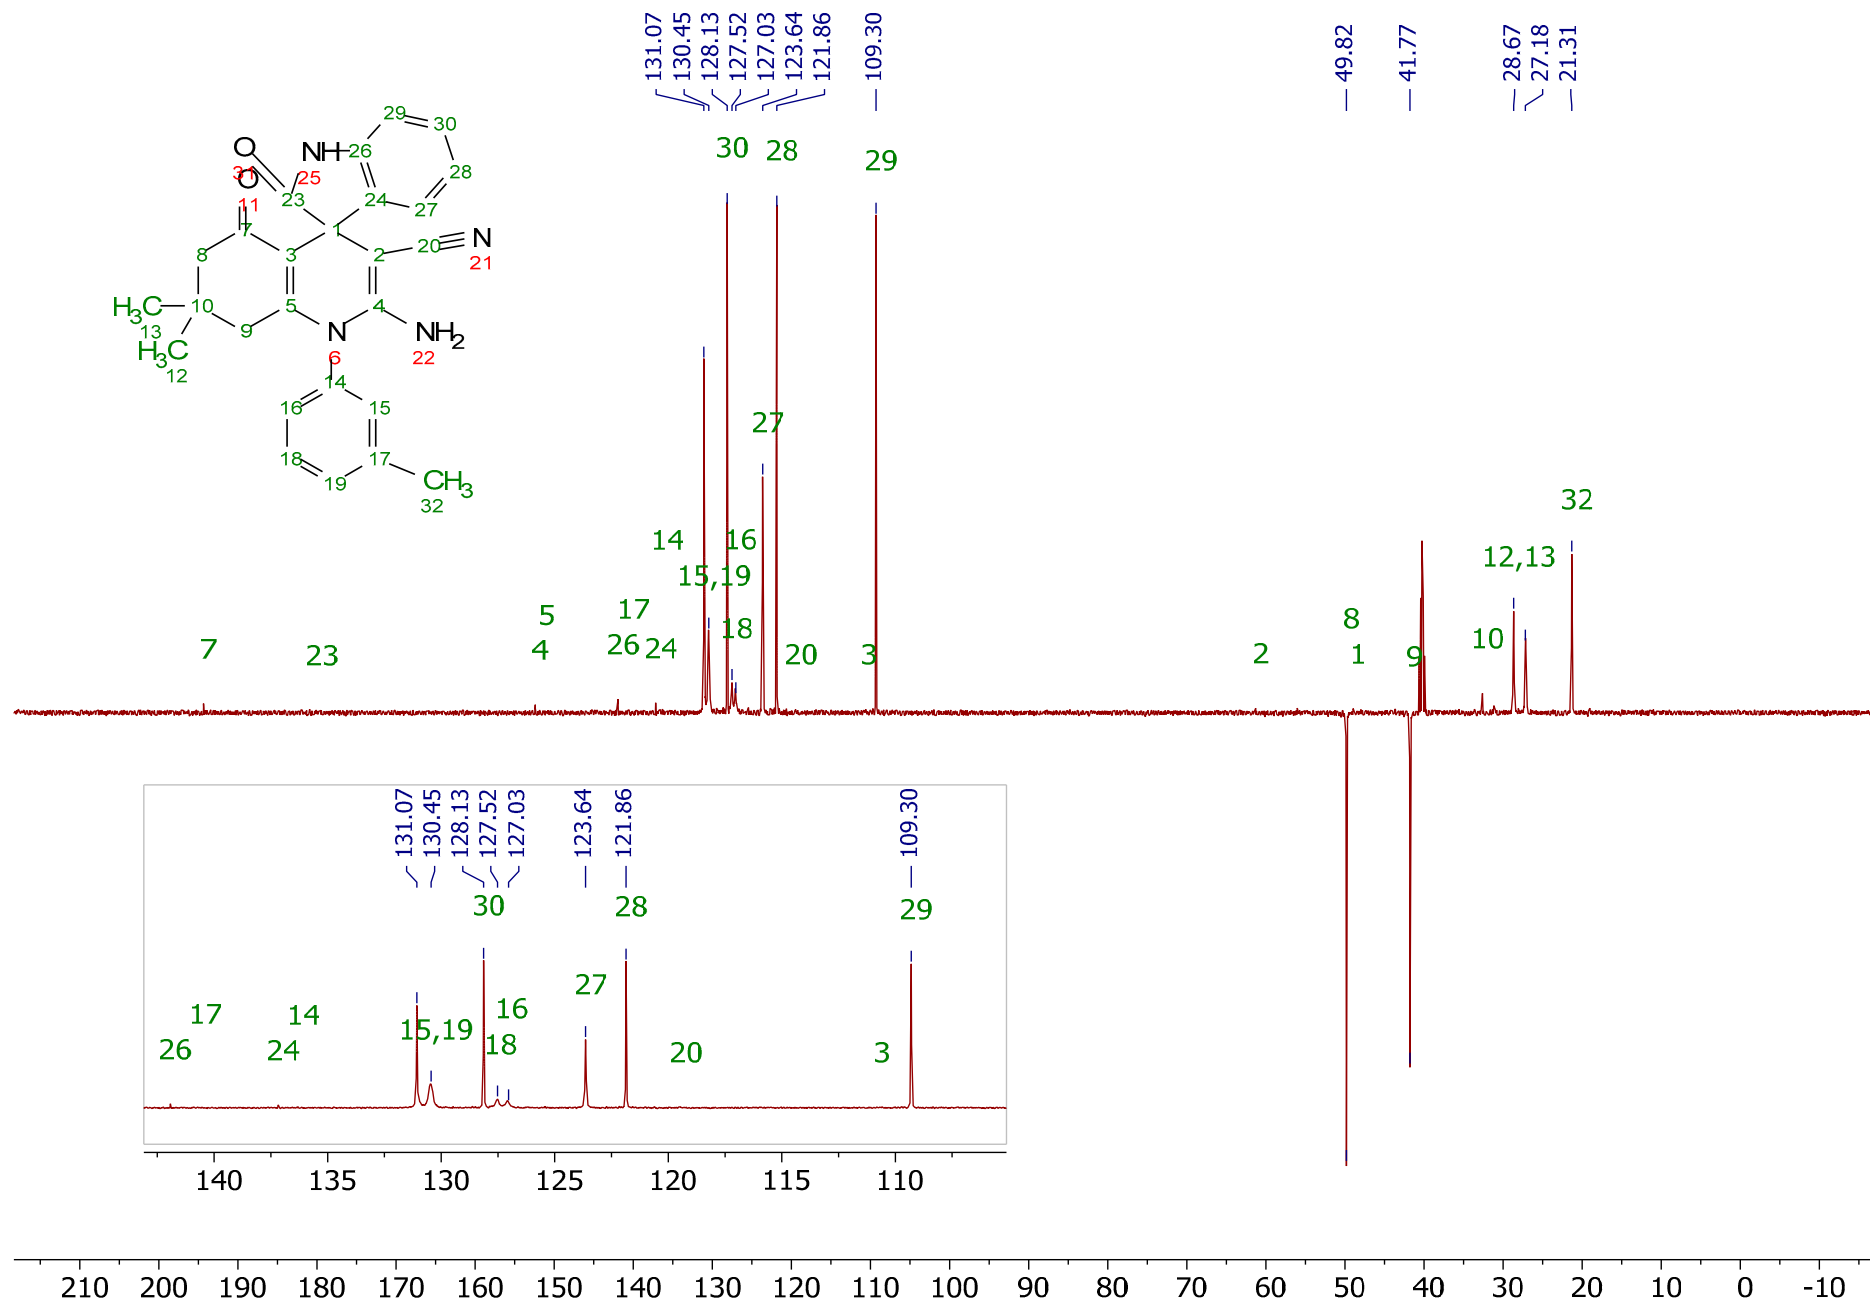

Figure S89 - DEPT spectrum of 7b

6 18 (0.604) Cm (7:26)

Scan AP+  
8.02e7

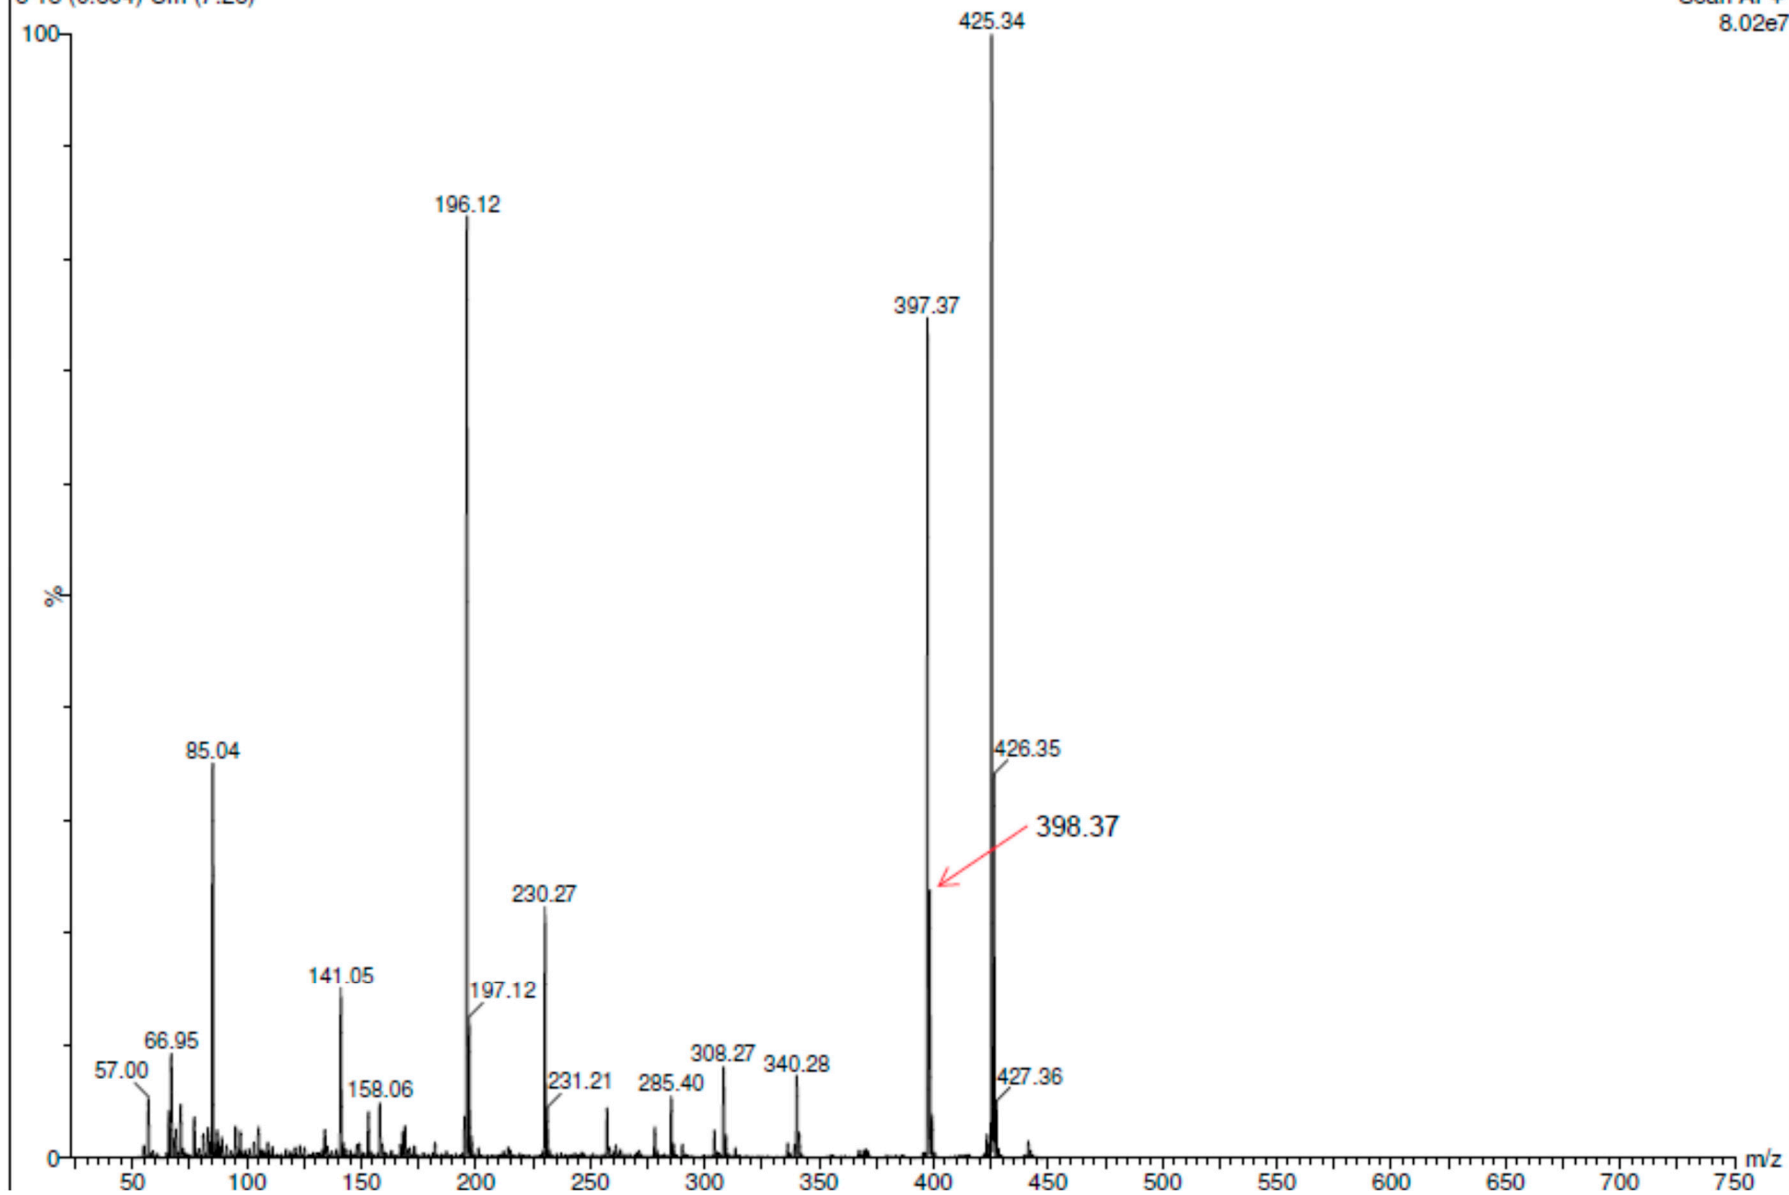

Figure S90 - MS spectrum of 7b

Table S11 - Fragmentation positions for peaks in MS spectrum of 7b

| <u>m/z</u> | <u>Fragmentation position</u>                                                       |
|------------|-------------------------------------------------------------------------------------|
| 426.35     | [M+H] <sup>+</sup>                                                                  |
| 398.37     | 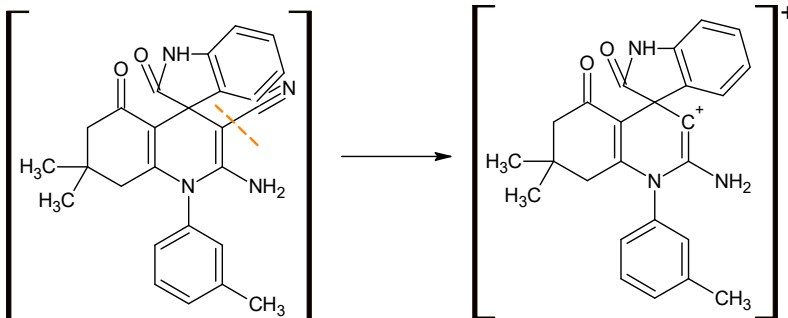  |
| 340.28     |   |
| 308.27     |  |

1.22. **Product 7c: 2'-Amino-7',7'-dimethyl-1'-(3-nitrophenyl)-2,5'-dioxo-5',6',7',8'-tetrahydro-1H-spiro[indoline-3,4'-quinoline]-3'-carbonitrile**

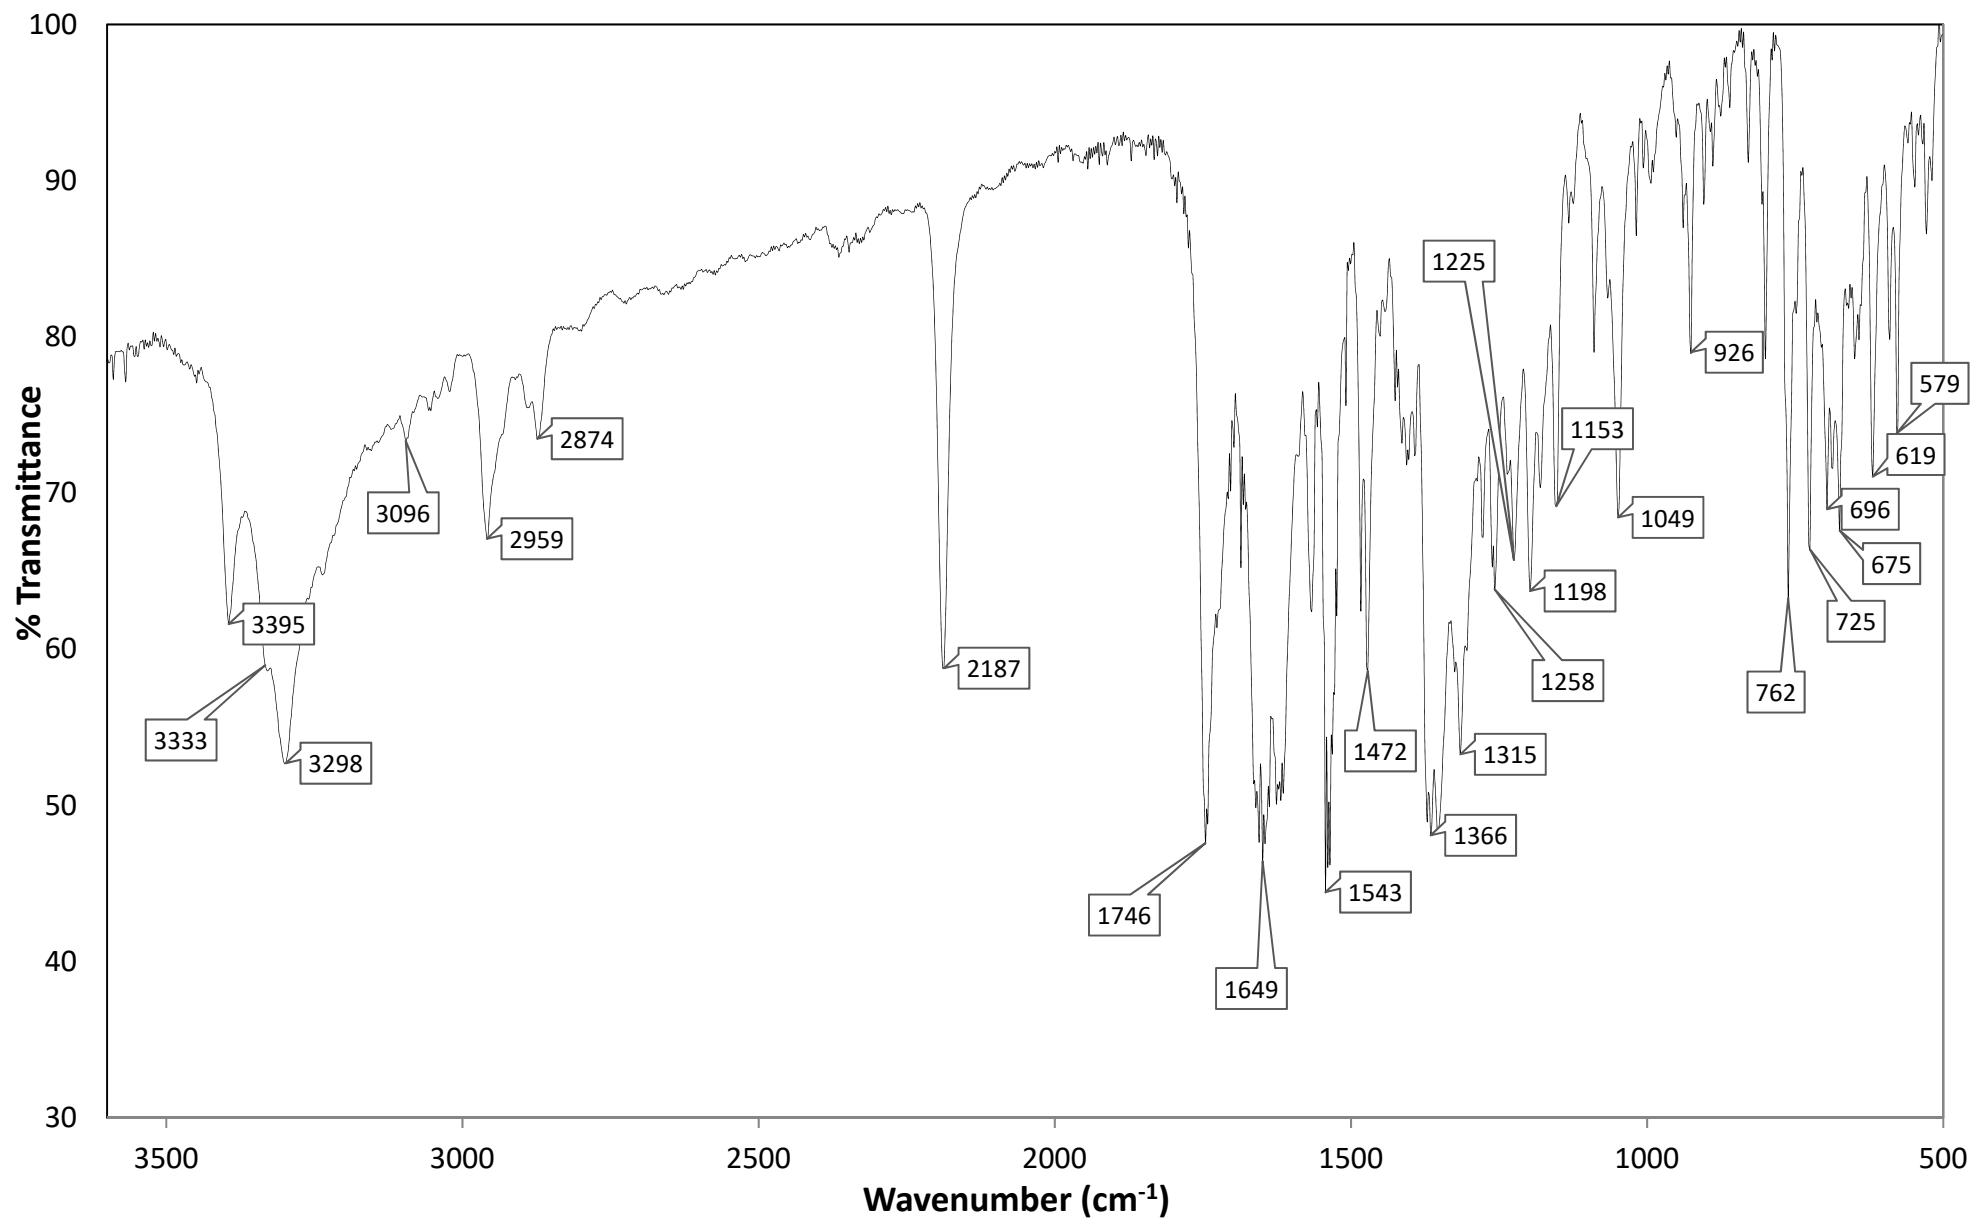

Figure S91 - IR spectrum of 7c

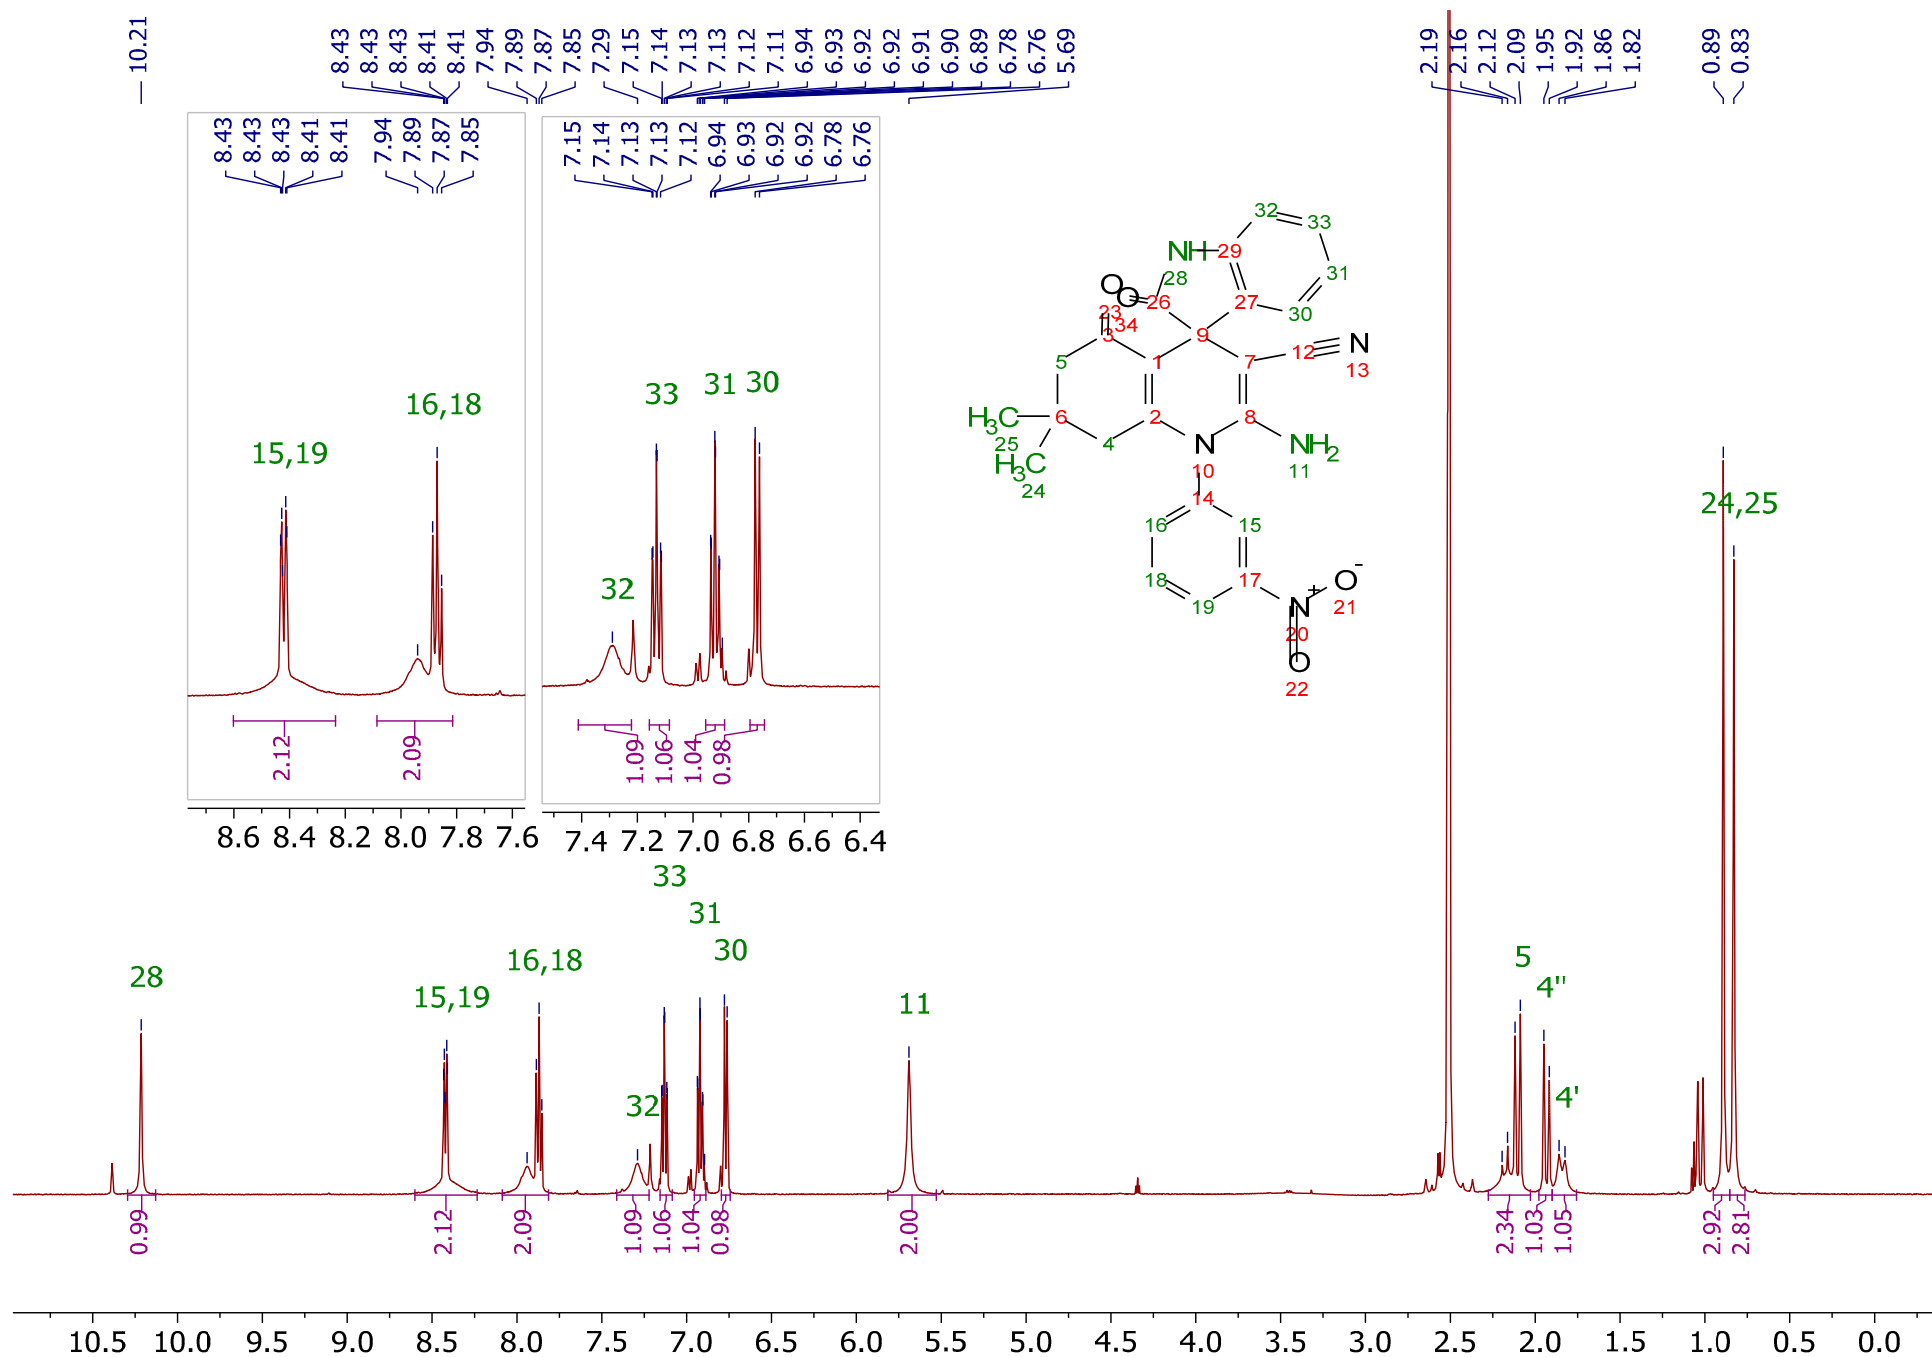

Figure S92 -  $^1\text{H}$  NMR spectrum of **7c**

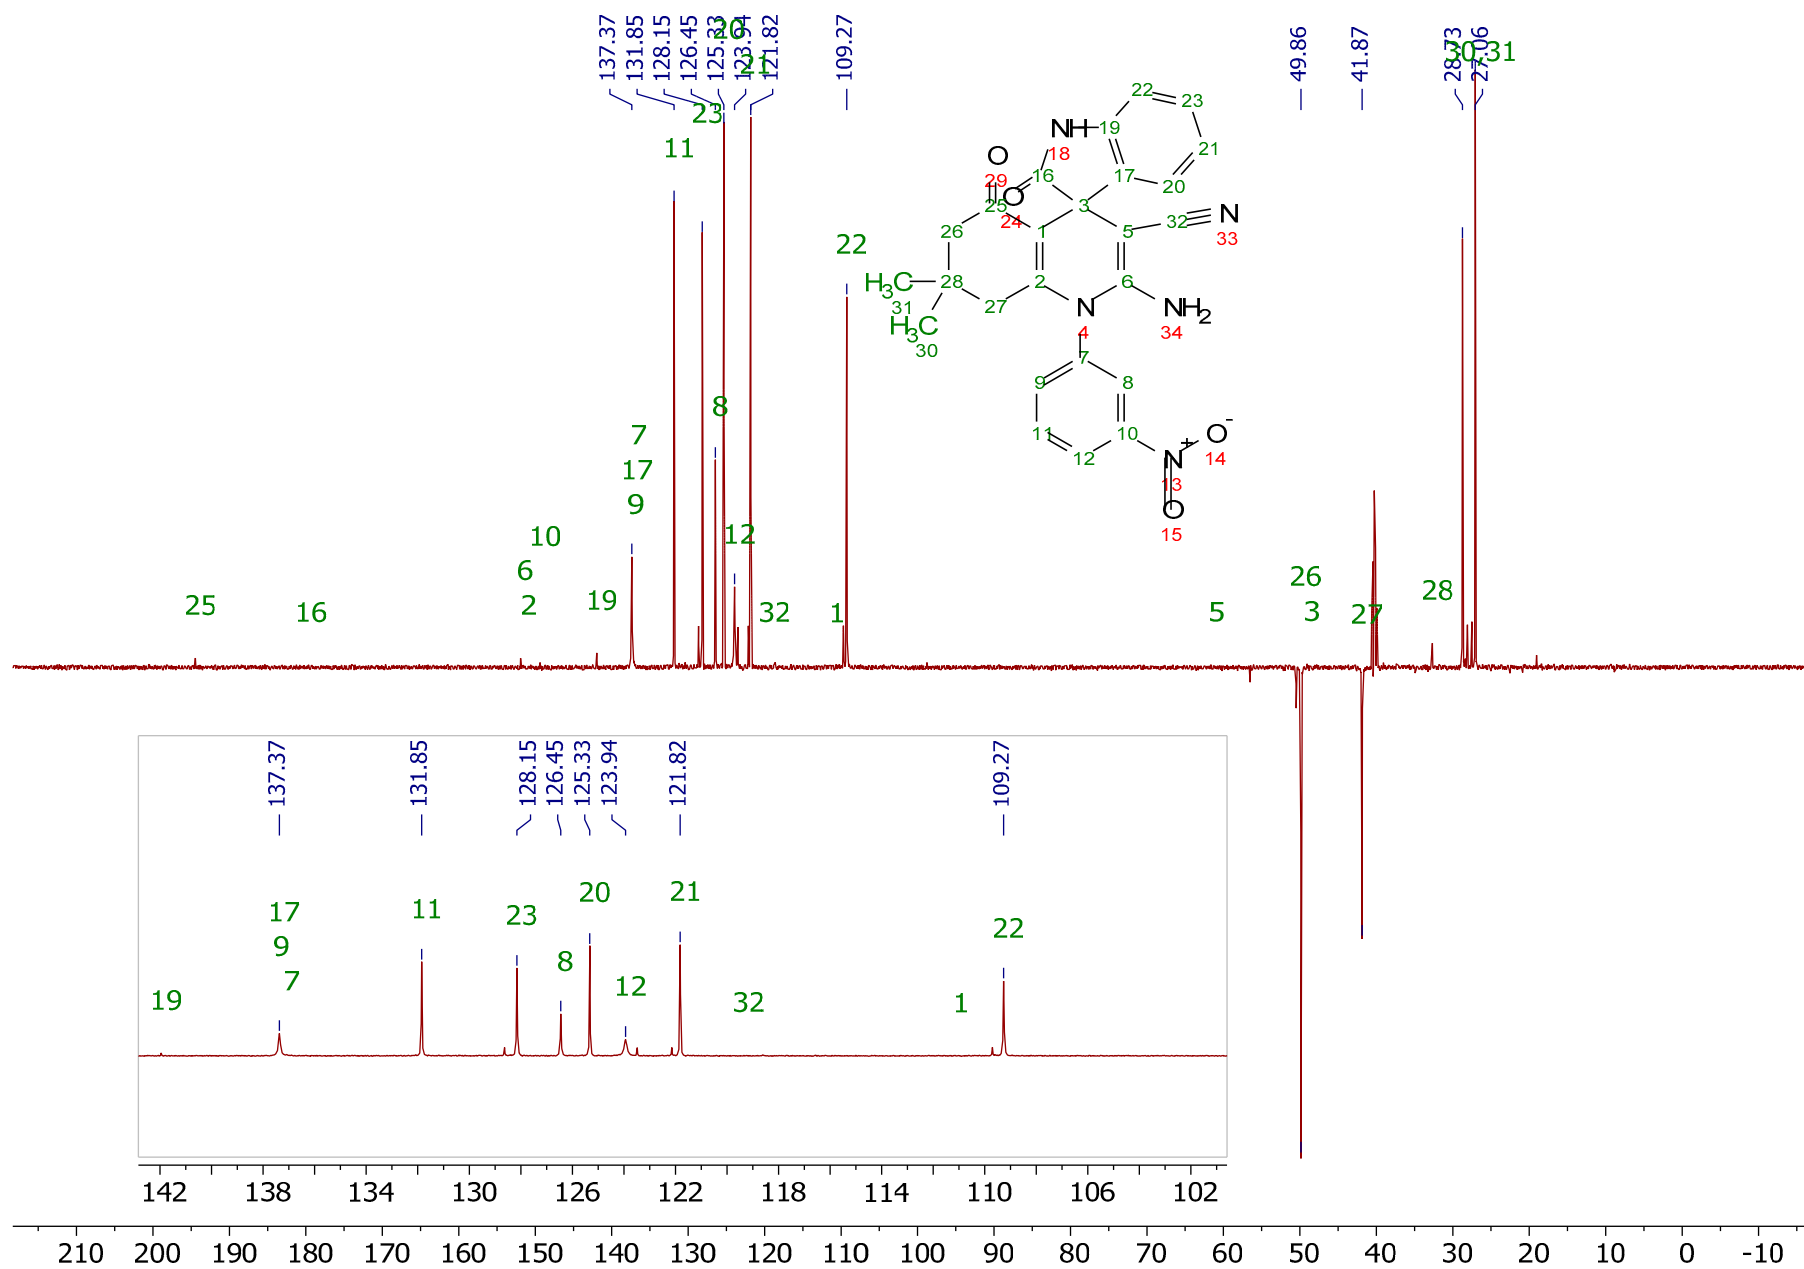

Figure S93 -  $^{13}\text{C}$  NMR spectrum of **7c**

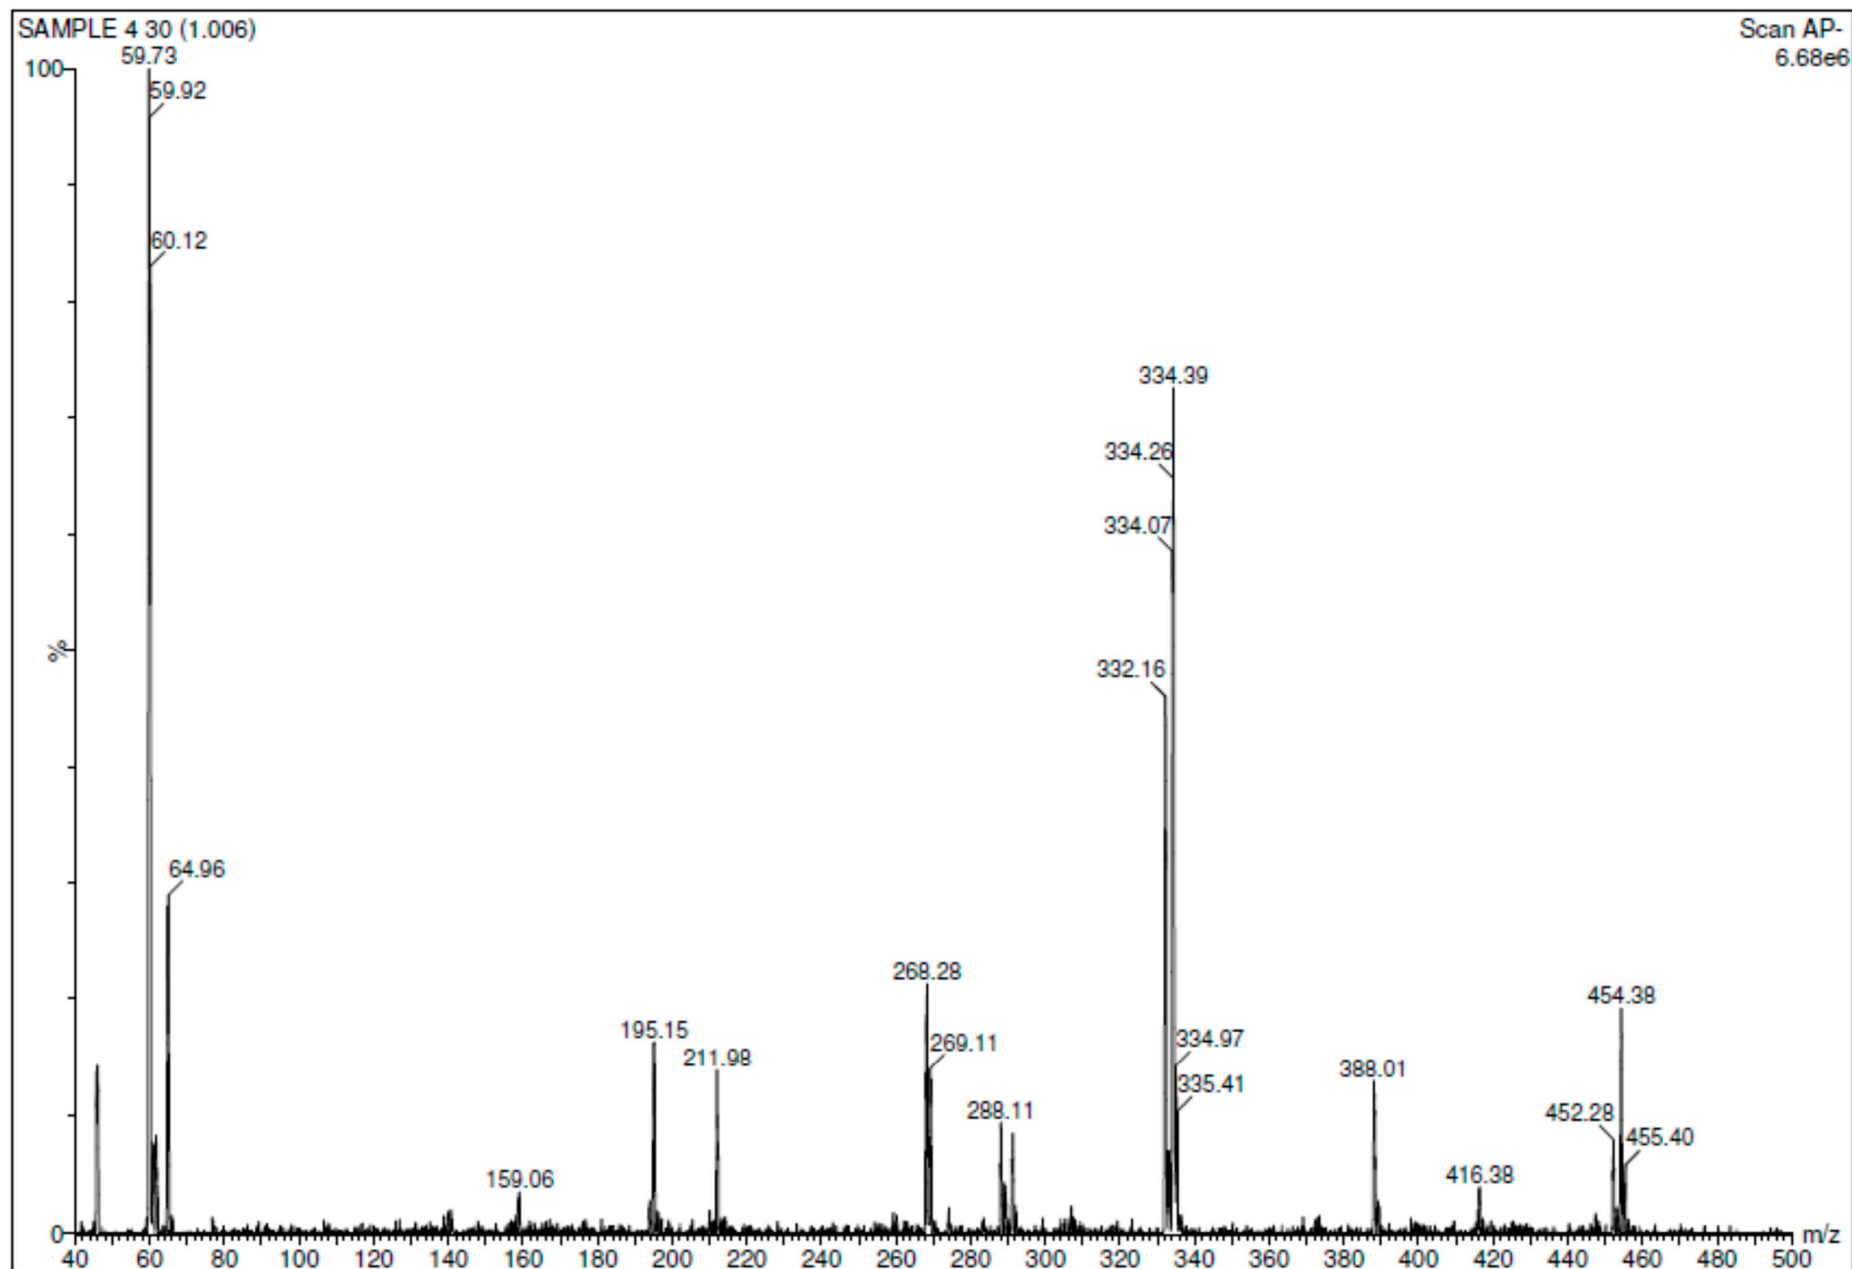

Figure S94 - Mass spectrum of 7c

Table S12 - Fragmentation positions for peaks in mass spectrum of 7c

| <u>m/z</u> | <u>Fragmentation position</u>                                                      |
|------------|------------------------------------------------------------------------------------|
| 455.40     | [M] <sup>-</sup>                                                                   |
| 334.07     | 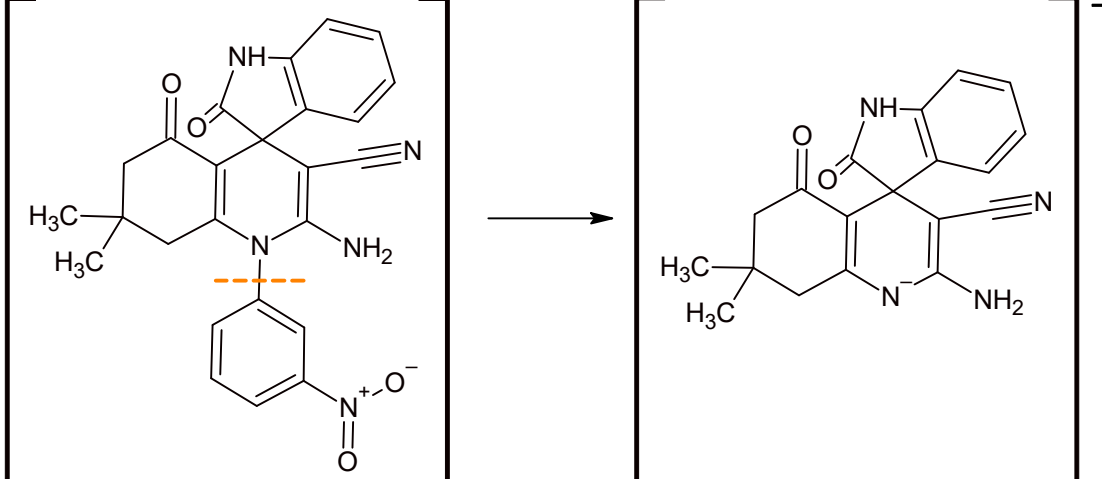 |



1.23. **Product 7d: 2'-Amino-1'-(4-methoxyphenyl)-7',7'-dimethyl-2,5'-dioxo-5',6',7',8'-tetrahydro-1H-spiro[indoline-3,4'-quinoline]-3'-carbonitrile**

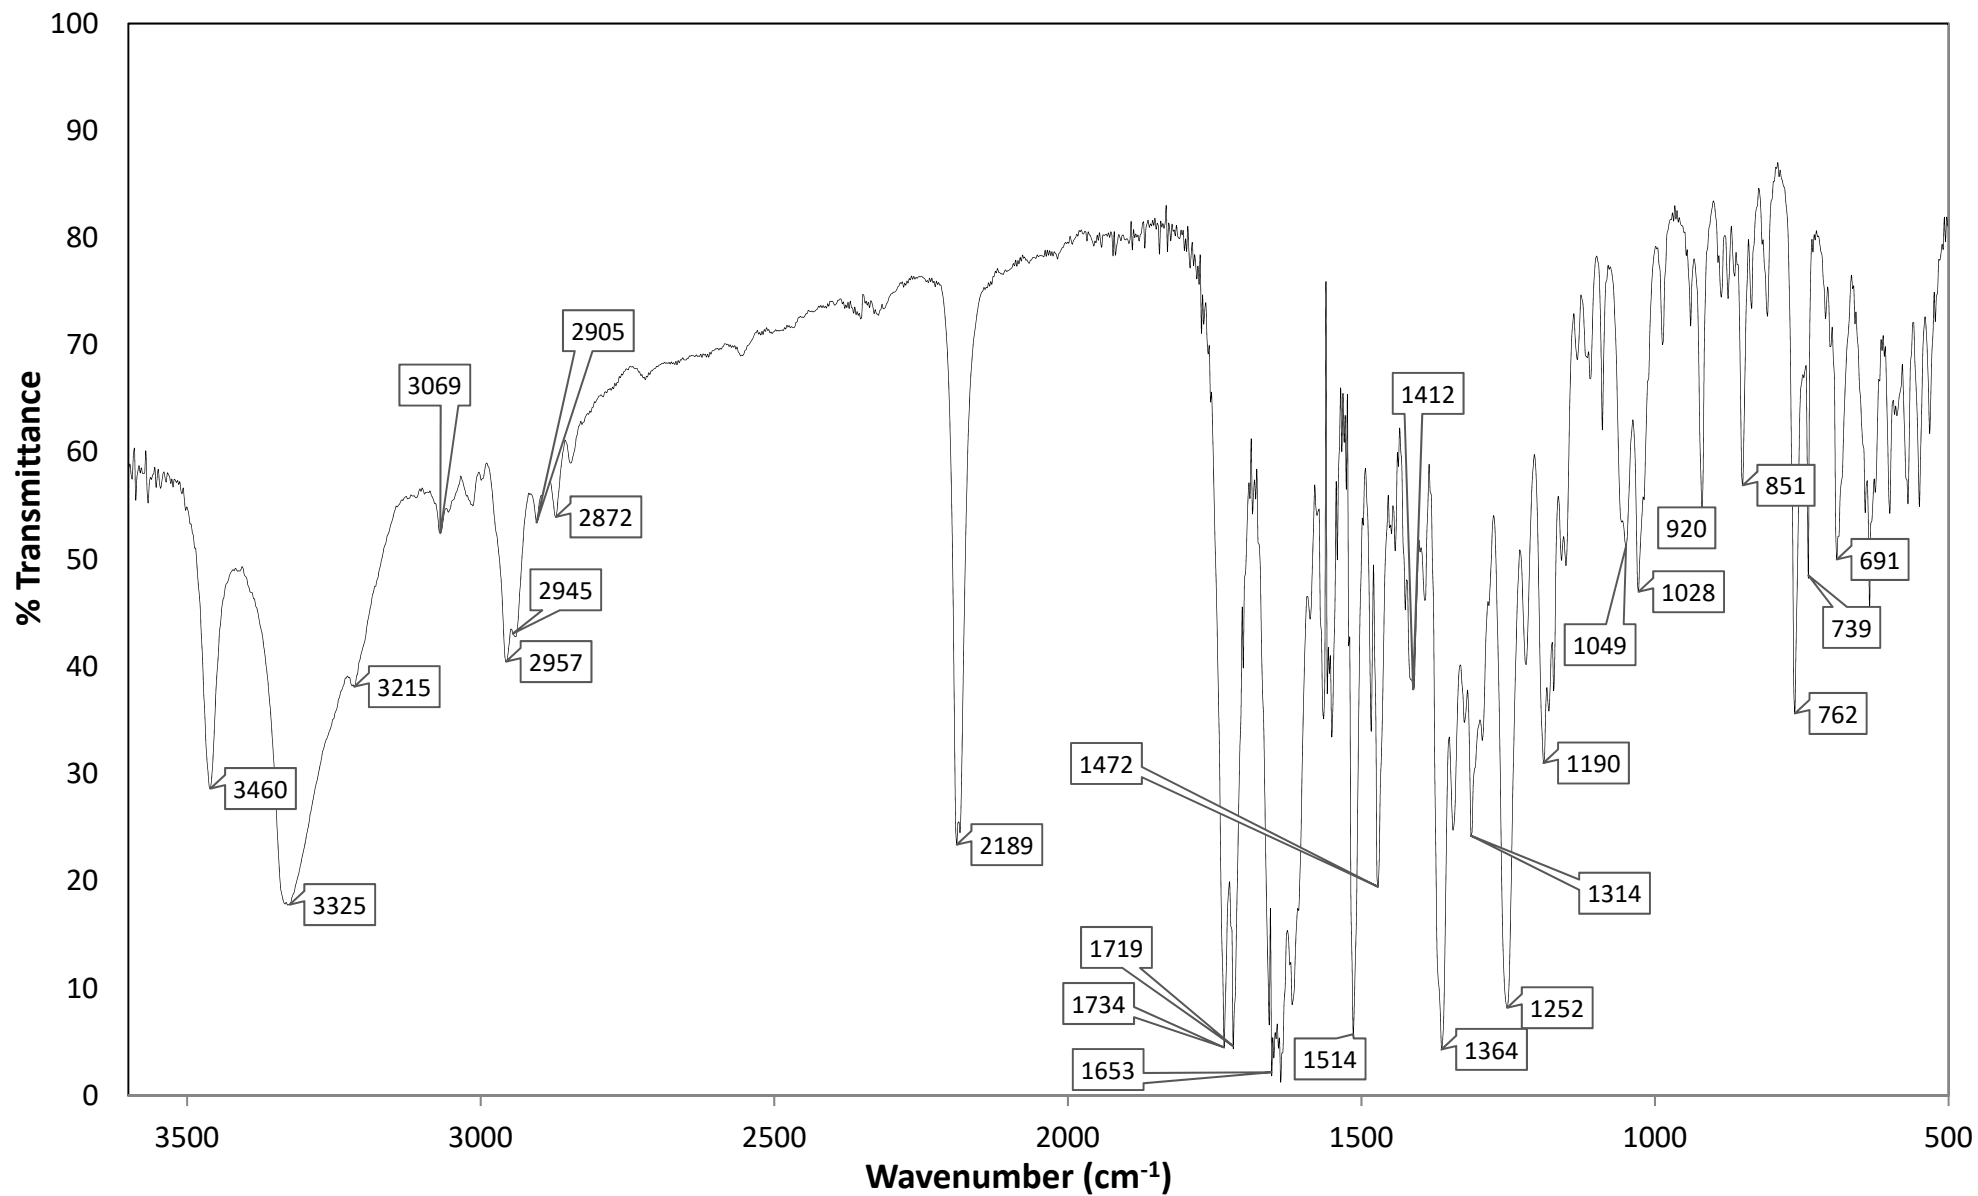

Figure S95 - IR spectrum of 7d



1.24. **Product 7e: 2'-Amino-1'-(4-chlorophenyl)-7',7'-dimethyl-2,5'-dioxo-5',6',7',8'-tetrahydro-1*H*-spiro[indoline-3,4'-quinoline]-3'-carbonitrile**

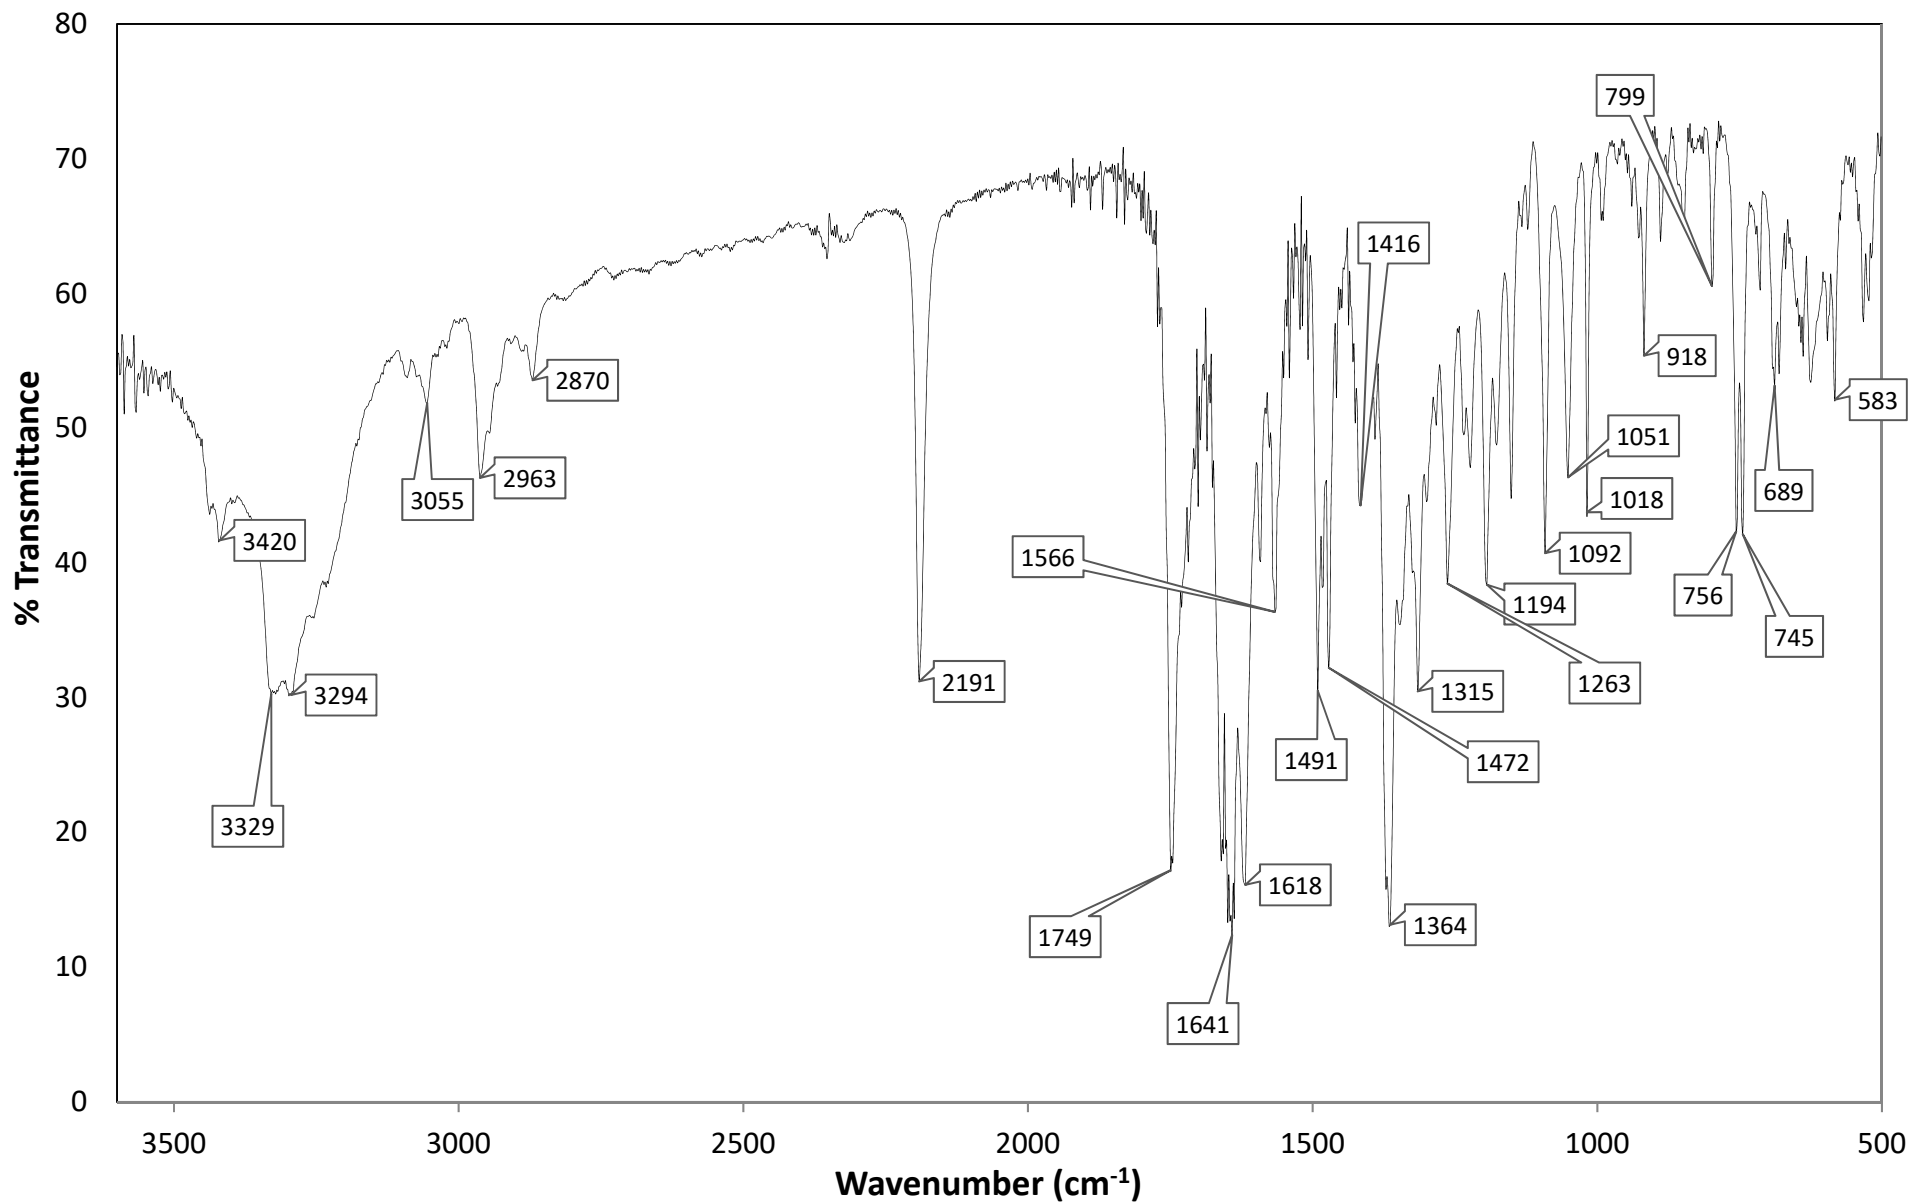

Figure S97 - IR spectrum of 7e

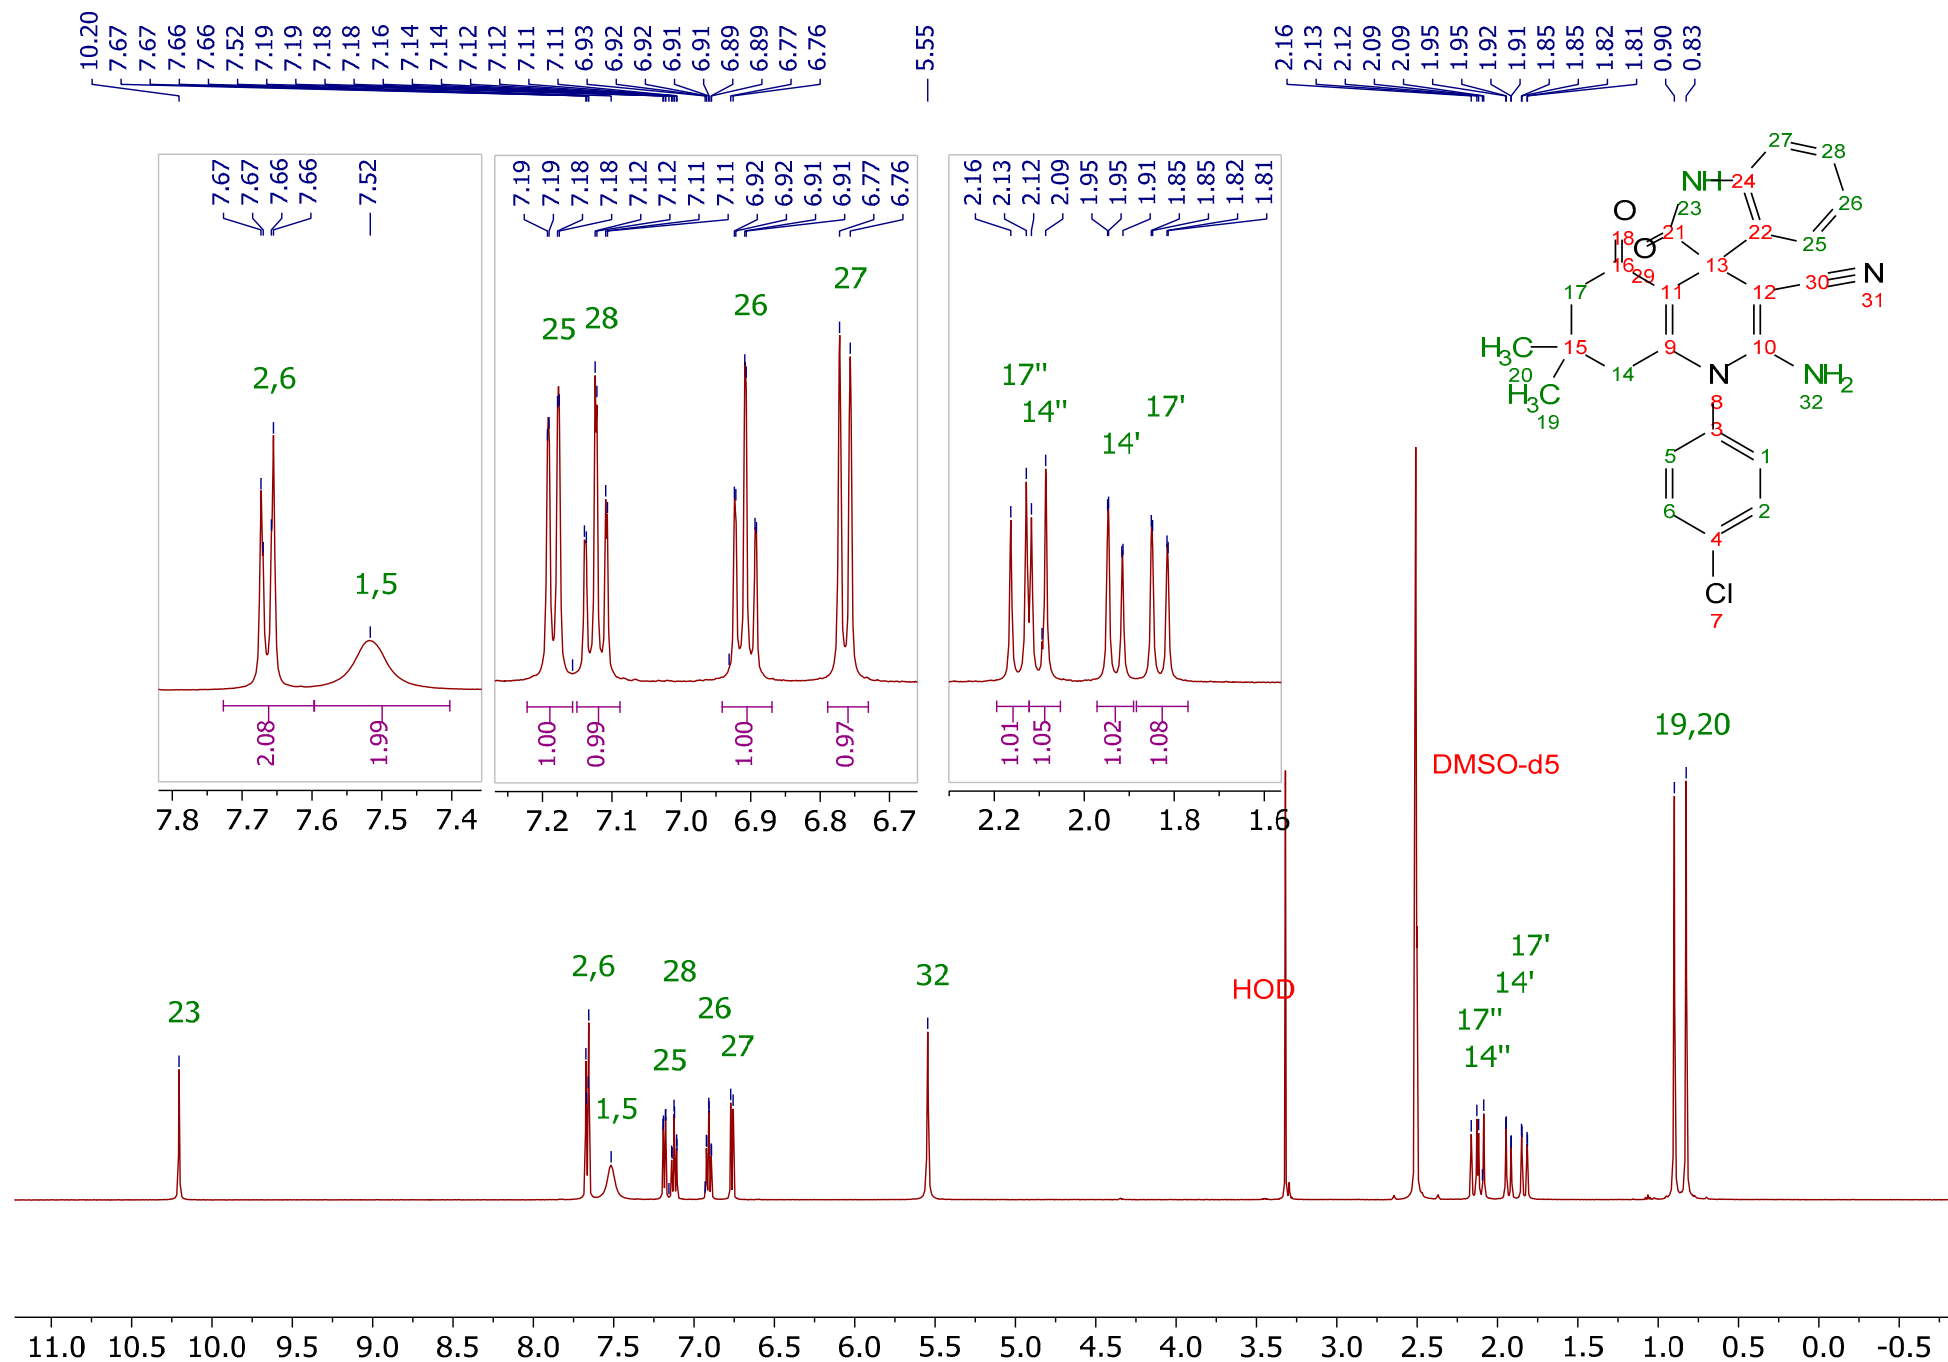

Figure S98 - <sup>1</sup>H NMR spectrum of 7e

1.25. **Product 7f: 2'-Amino-1'-(4-bromophenyl)-7',7'-dimethyl-2,5'-dioxo-5',6',7',8'-tetrahydro-1H-spiro[indoline-3,4'-quinoline]-3'-carbonitrile**

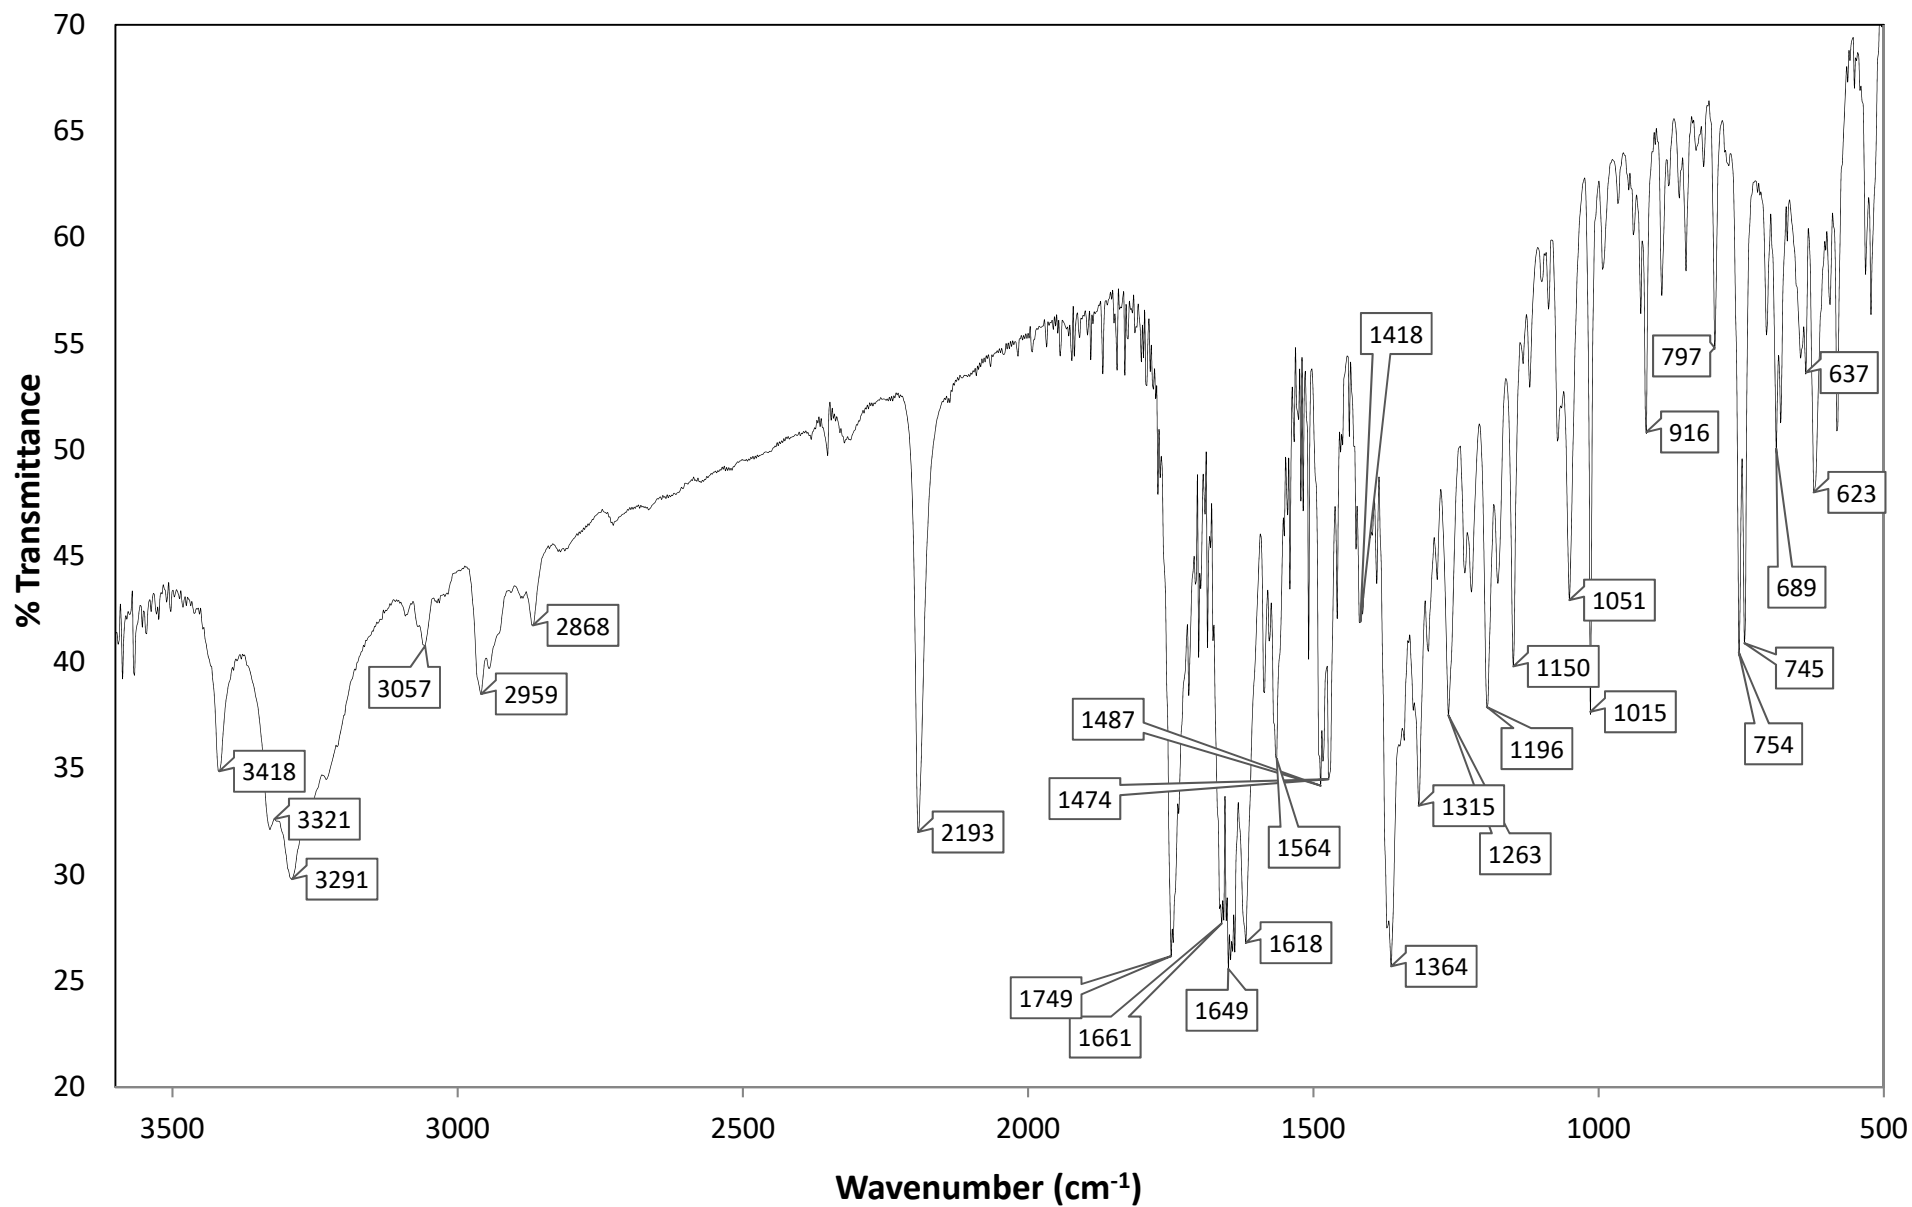

Figure S99 - IR spectrum of 7f

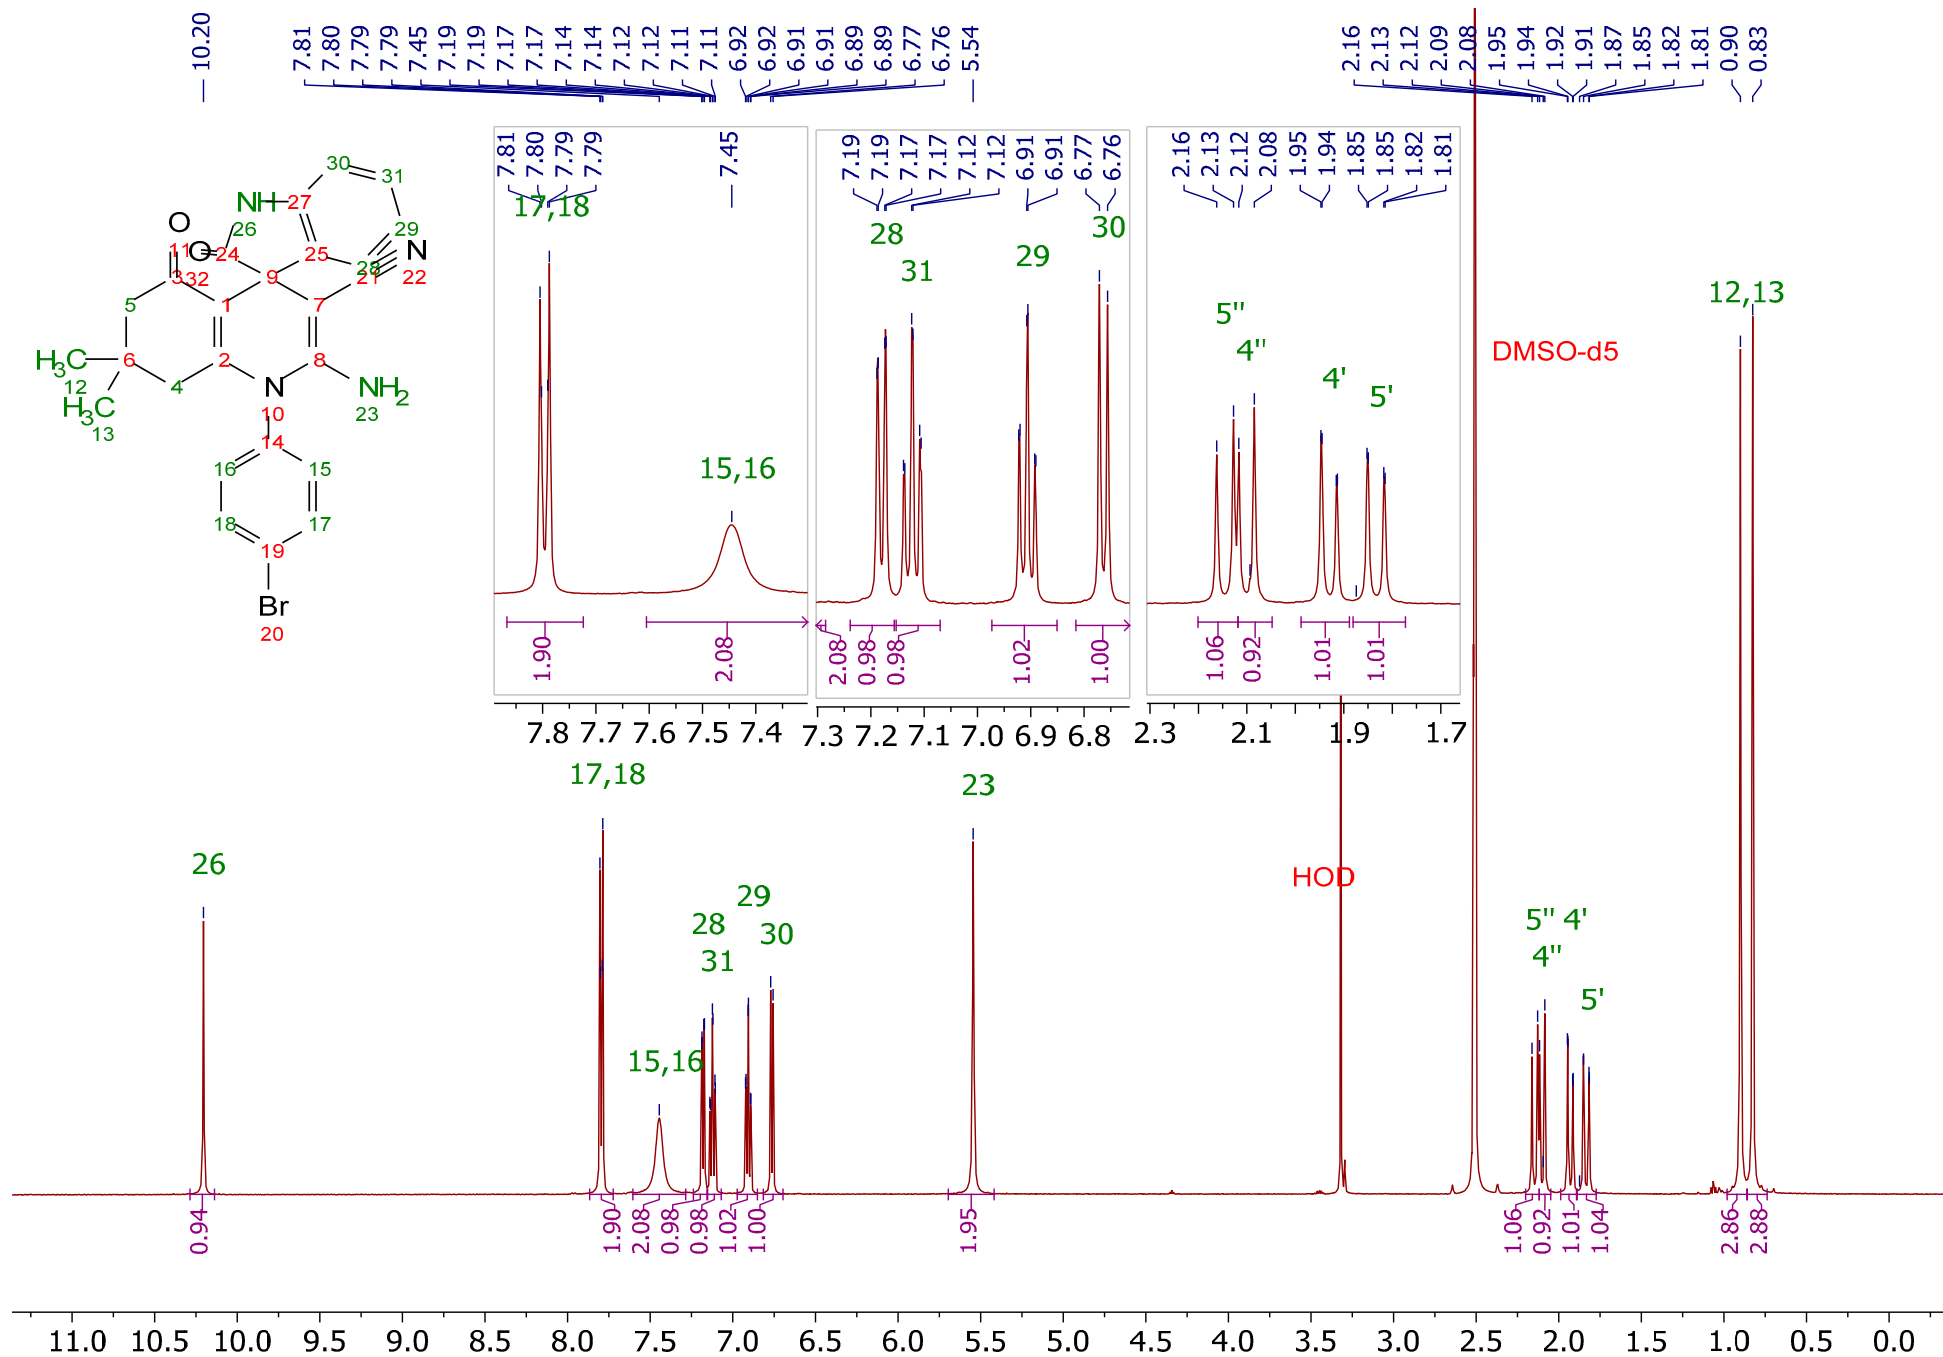

Figure S100 - <sup>1</sup>H NMR spectrum of 7f

1.26. **Product 7g: 2'-Amino-7',7'-dimethyl-1'-(4-methylphenyl)-2,5'-dioxo-5',6',7',8'-tetrahydro-1H-spiro[indoline-3,4'-quinoline]-3'-carbonitrile**

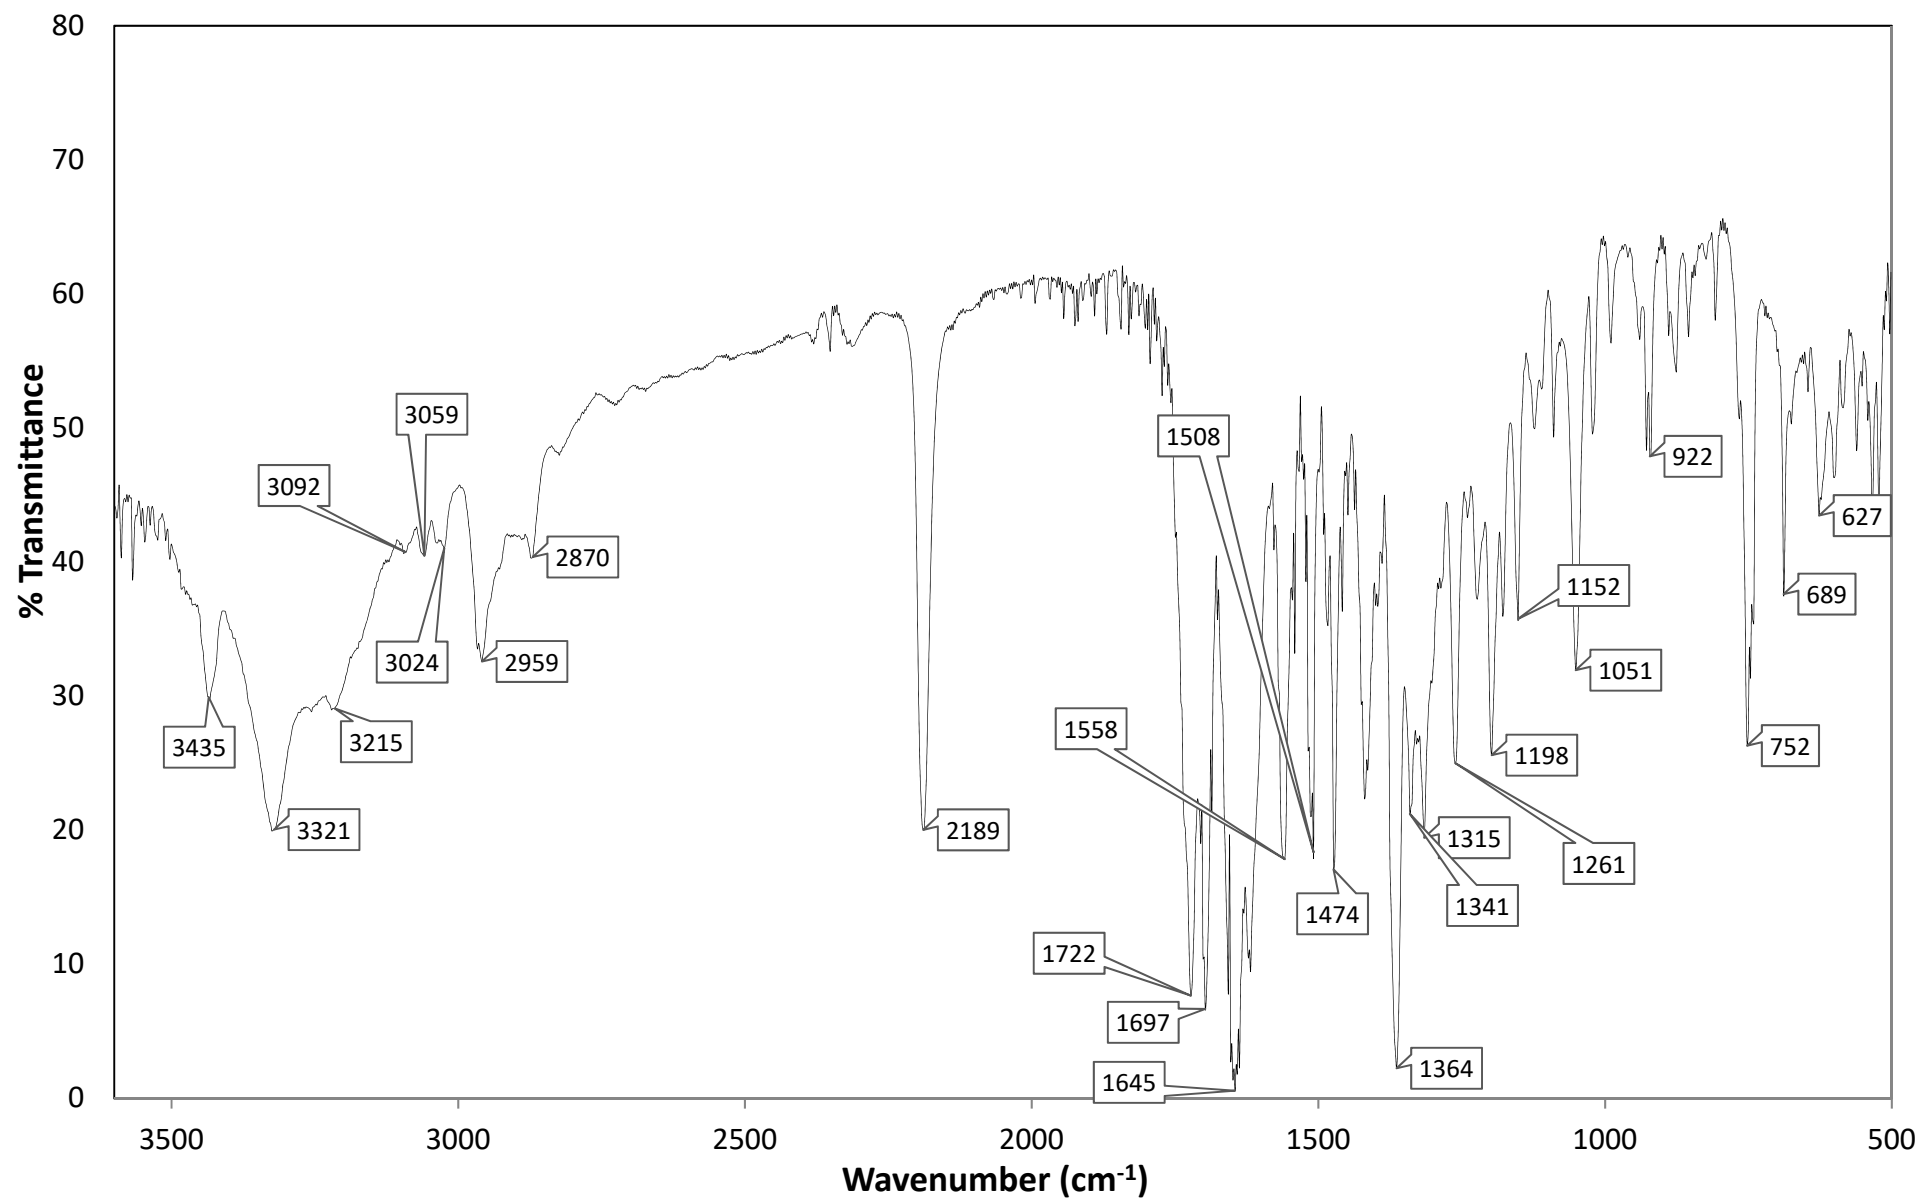

Figure S101 - IR spectrum of 7g

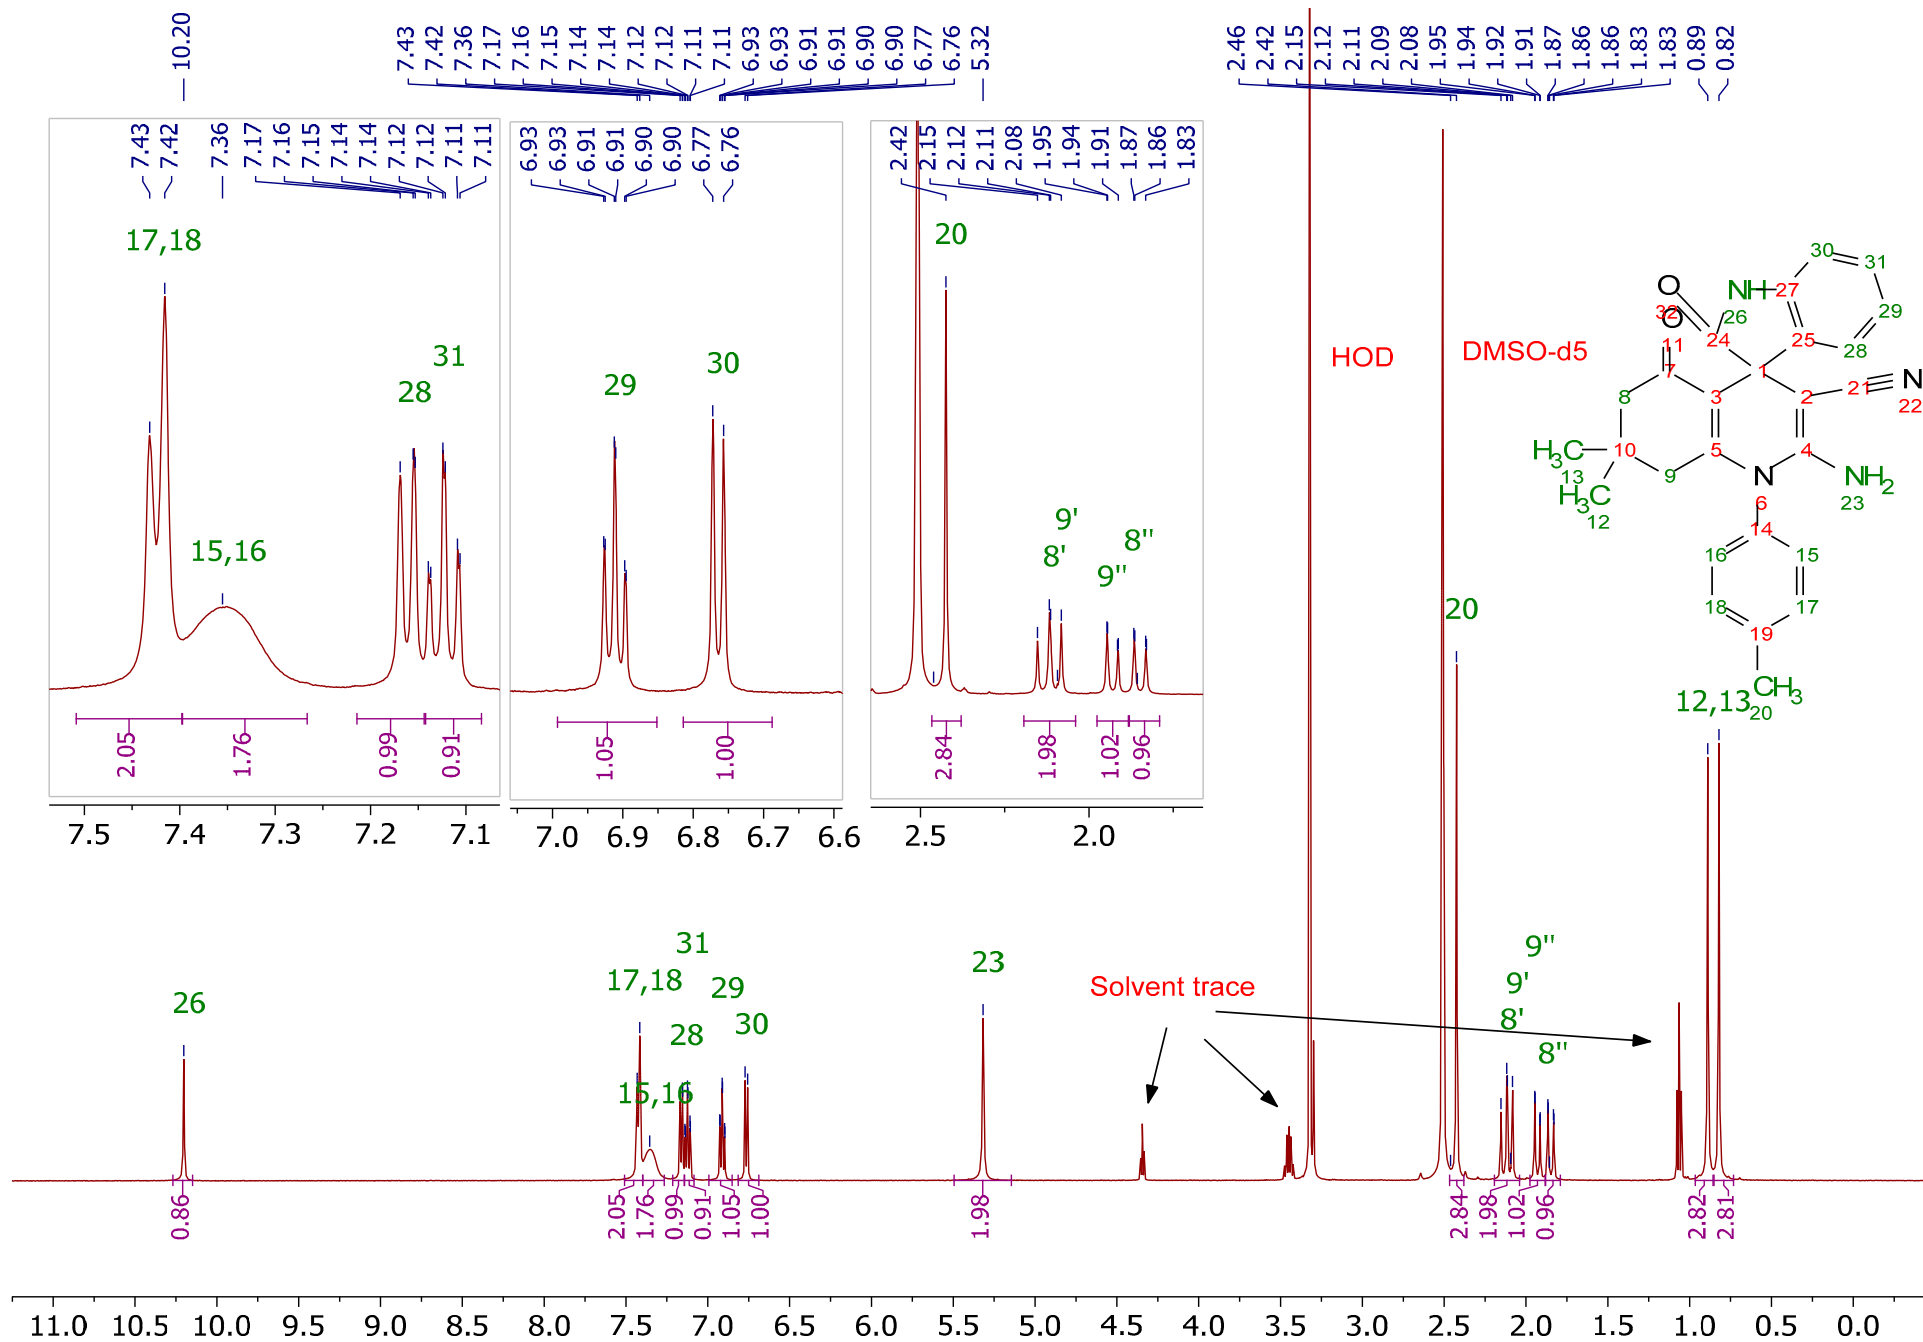

Figure S102 -  $^1\text{H}$  NMR spectrum of 7g



1.27. **Product 7i: 2'-Amino-1'-(3-chlorophenyl)-7',7'-dimethyl-1'-2,5'-dioxo-5',6',7',8'-tetrahydro-1*H*-spiro[indoline-3,4'-quinoline]-3'-carbonitrile**

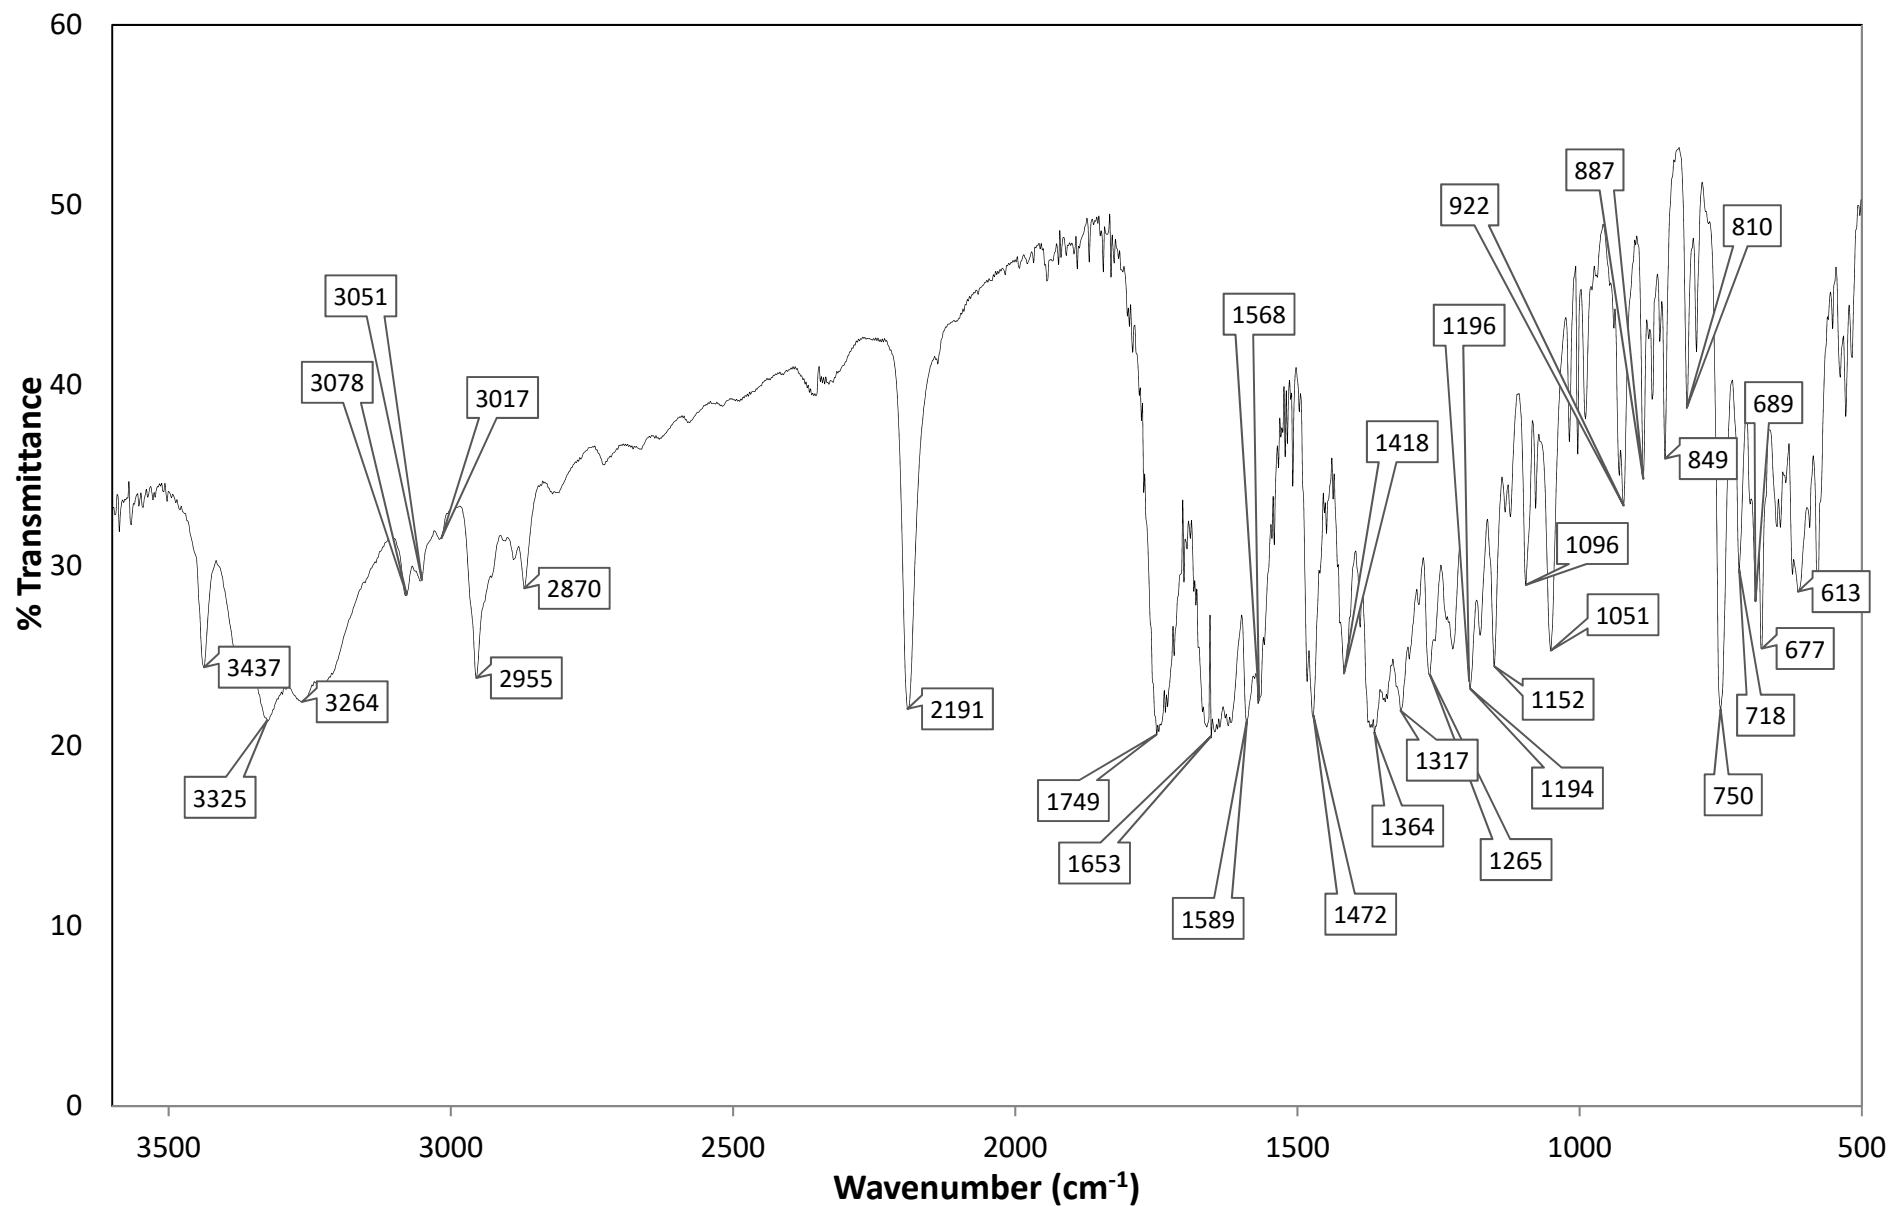

Figure S103 - IR spectrum of 7i

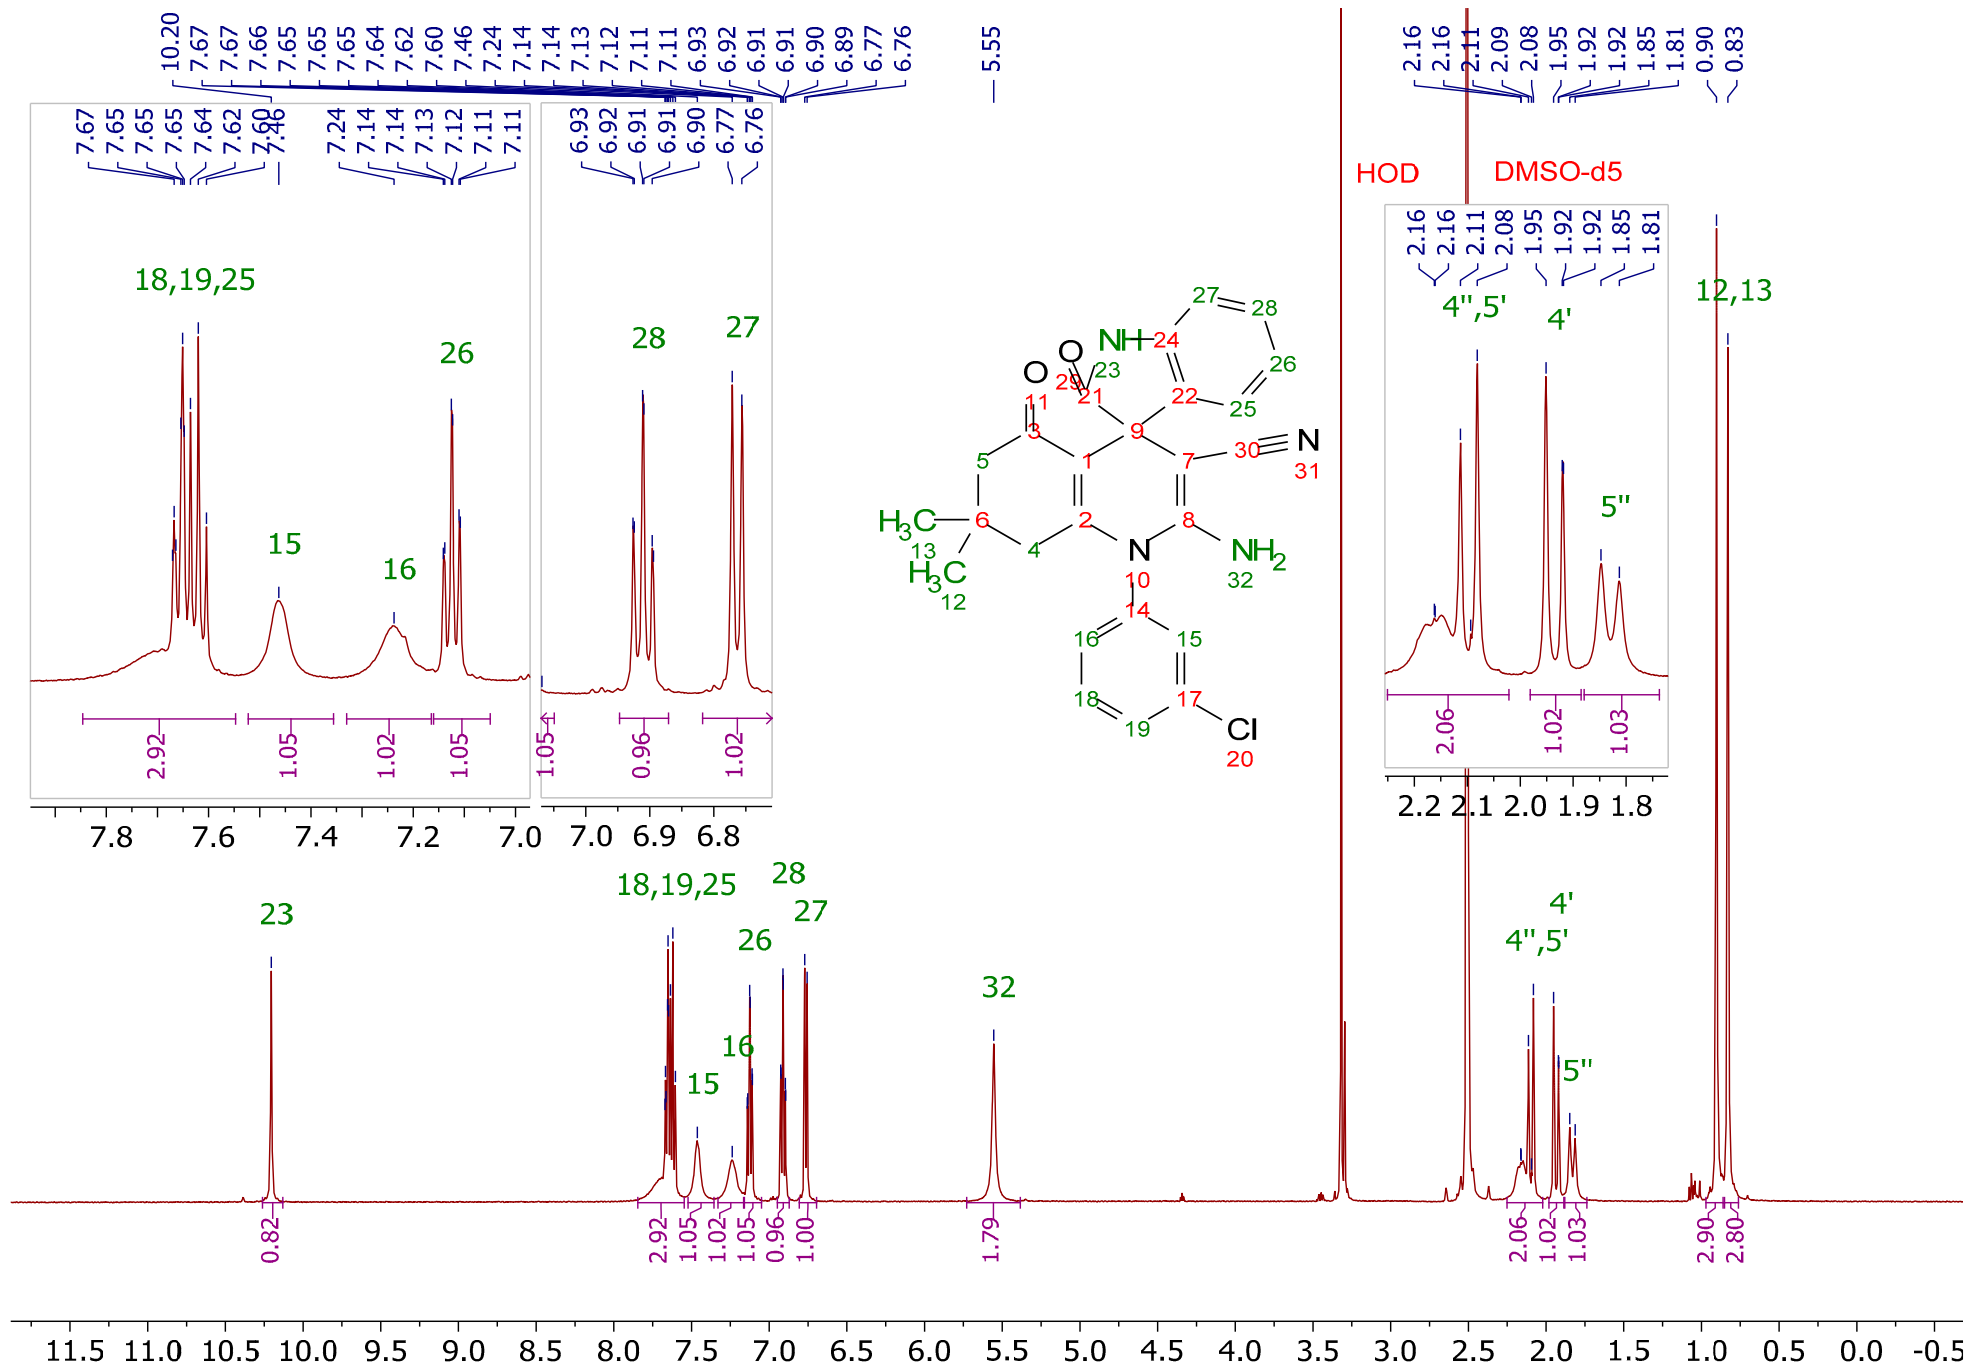

Figure S104 -  $^1\text{H}$  NMR spectrum of 7i

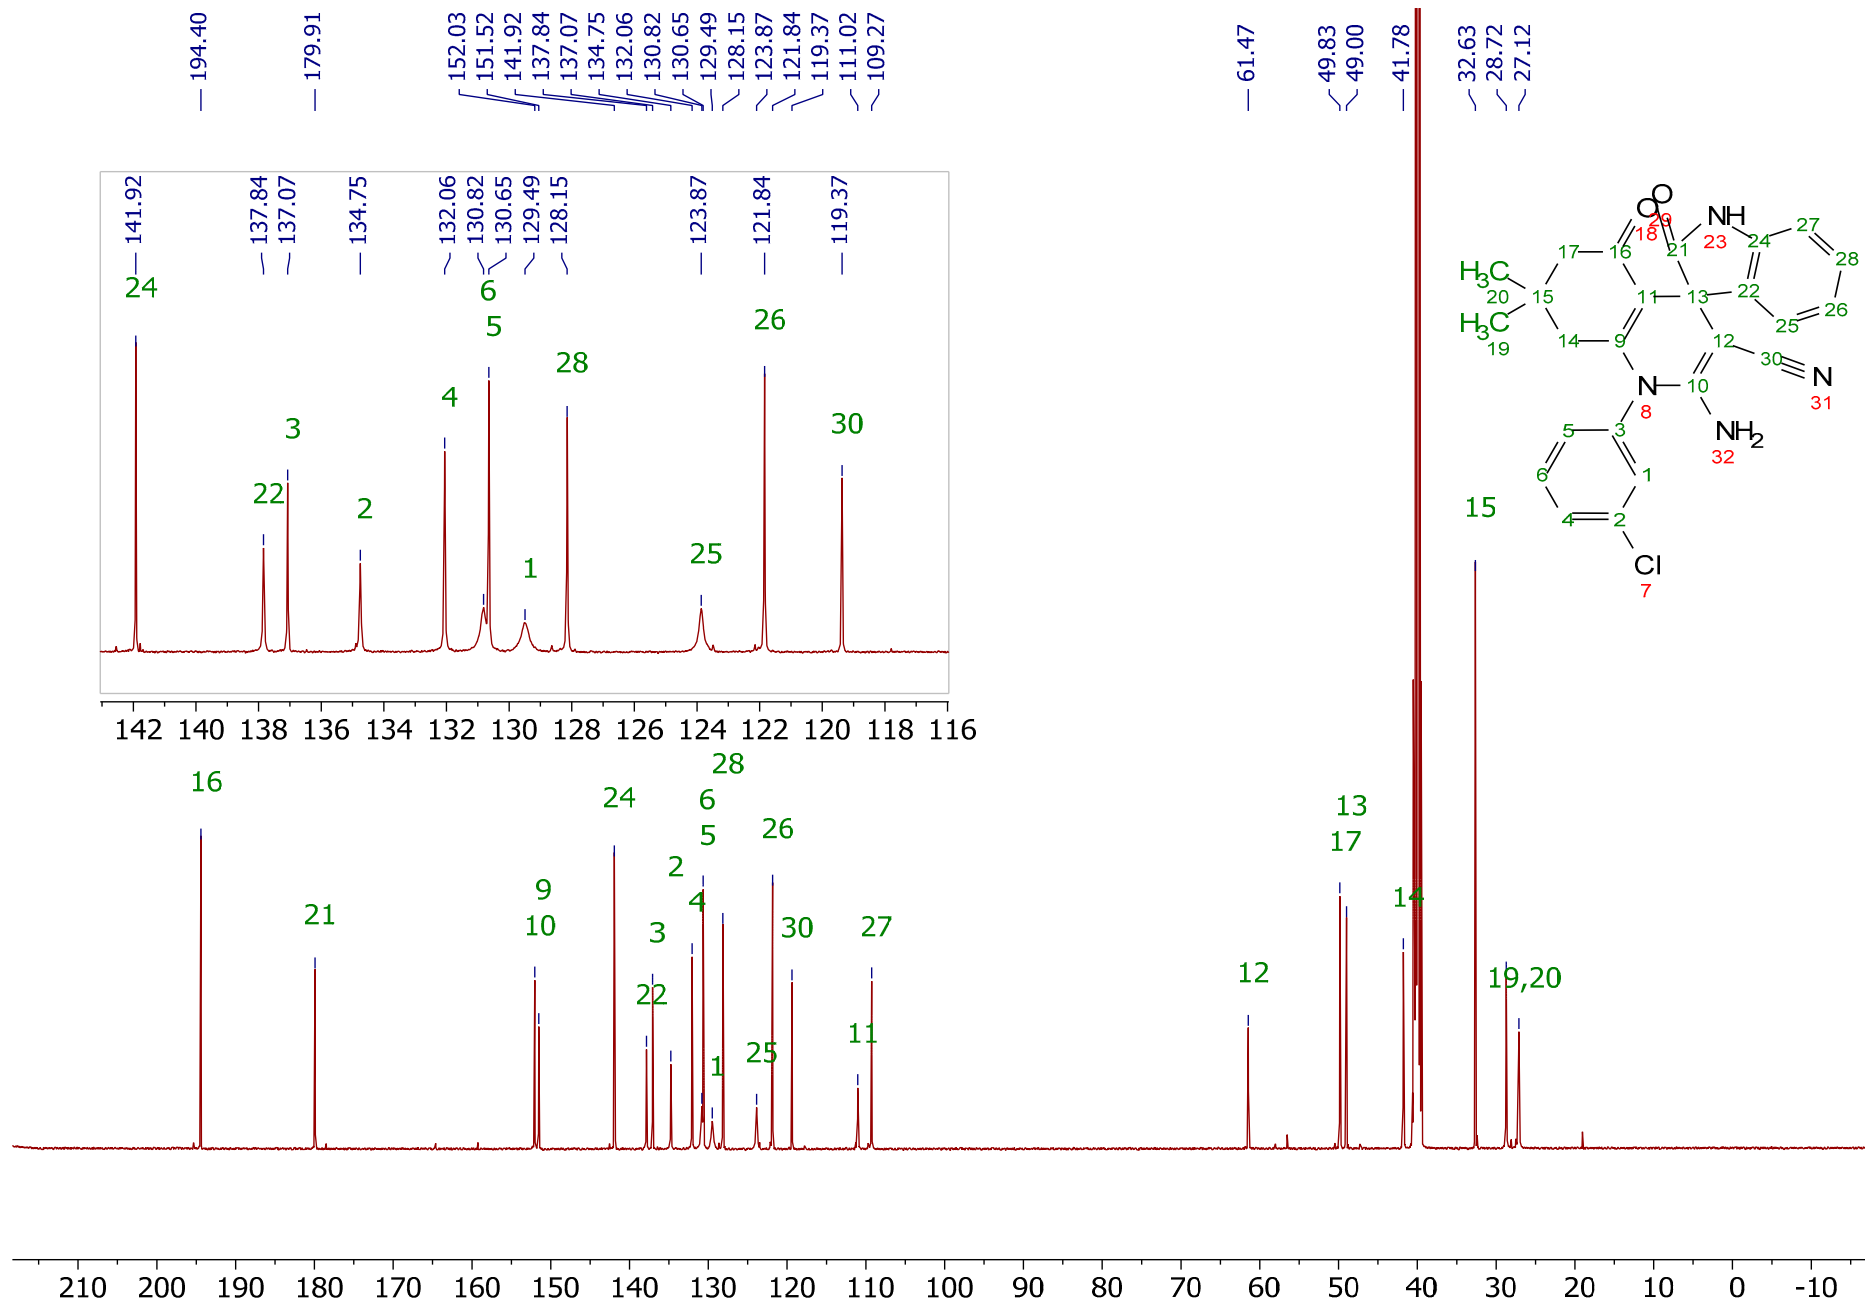

Figure S105 - <sup>13</sup>C NMR spectrum of 7i

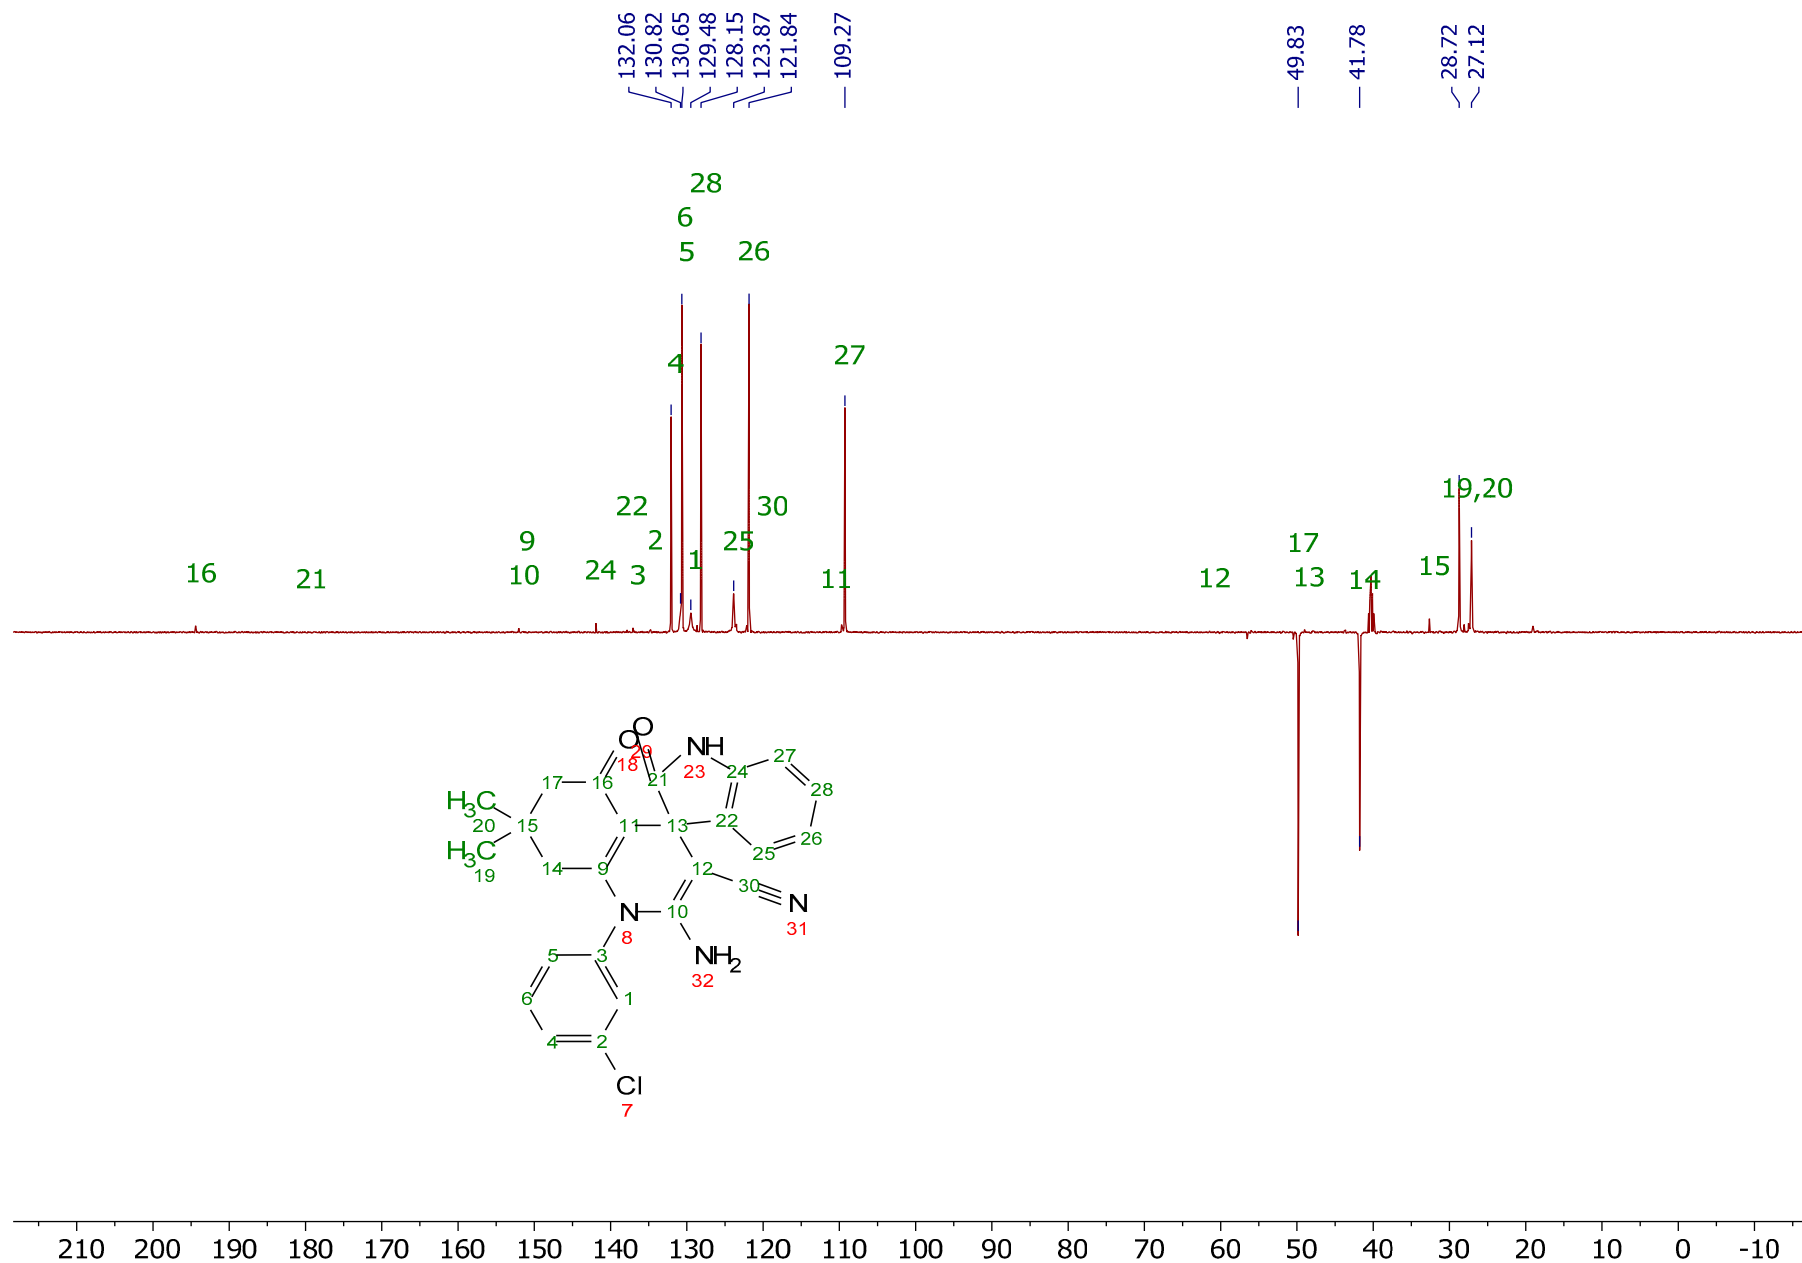

Figure S106 - DEPT spectrum of 7i

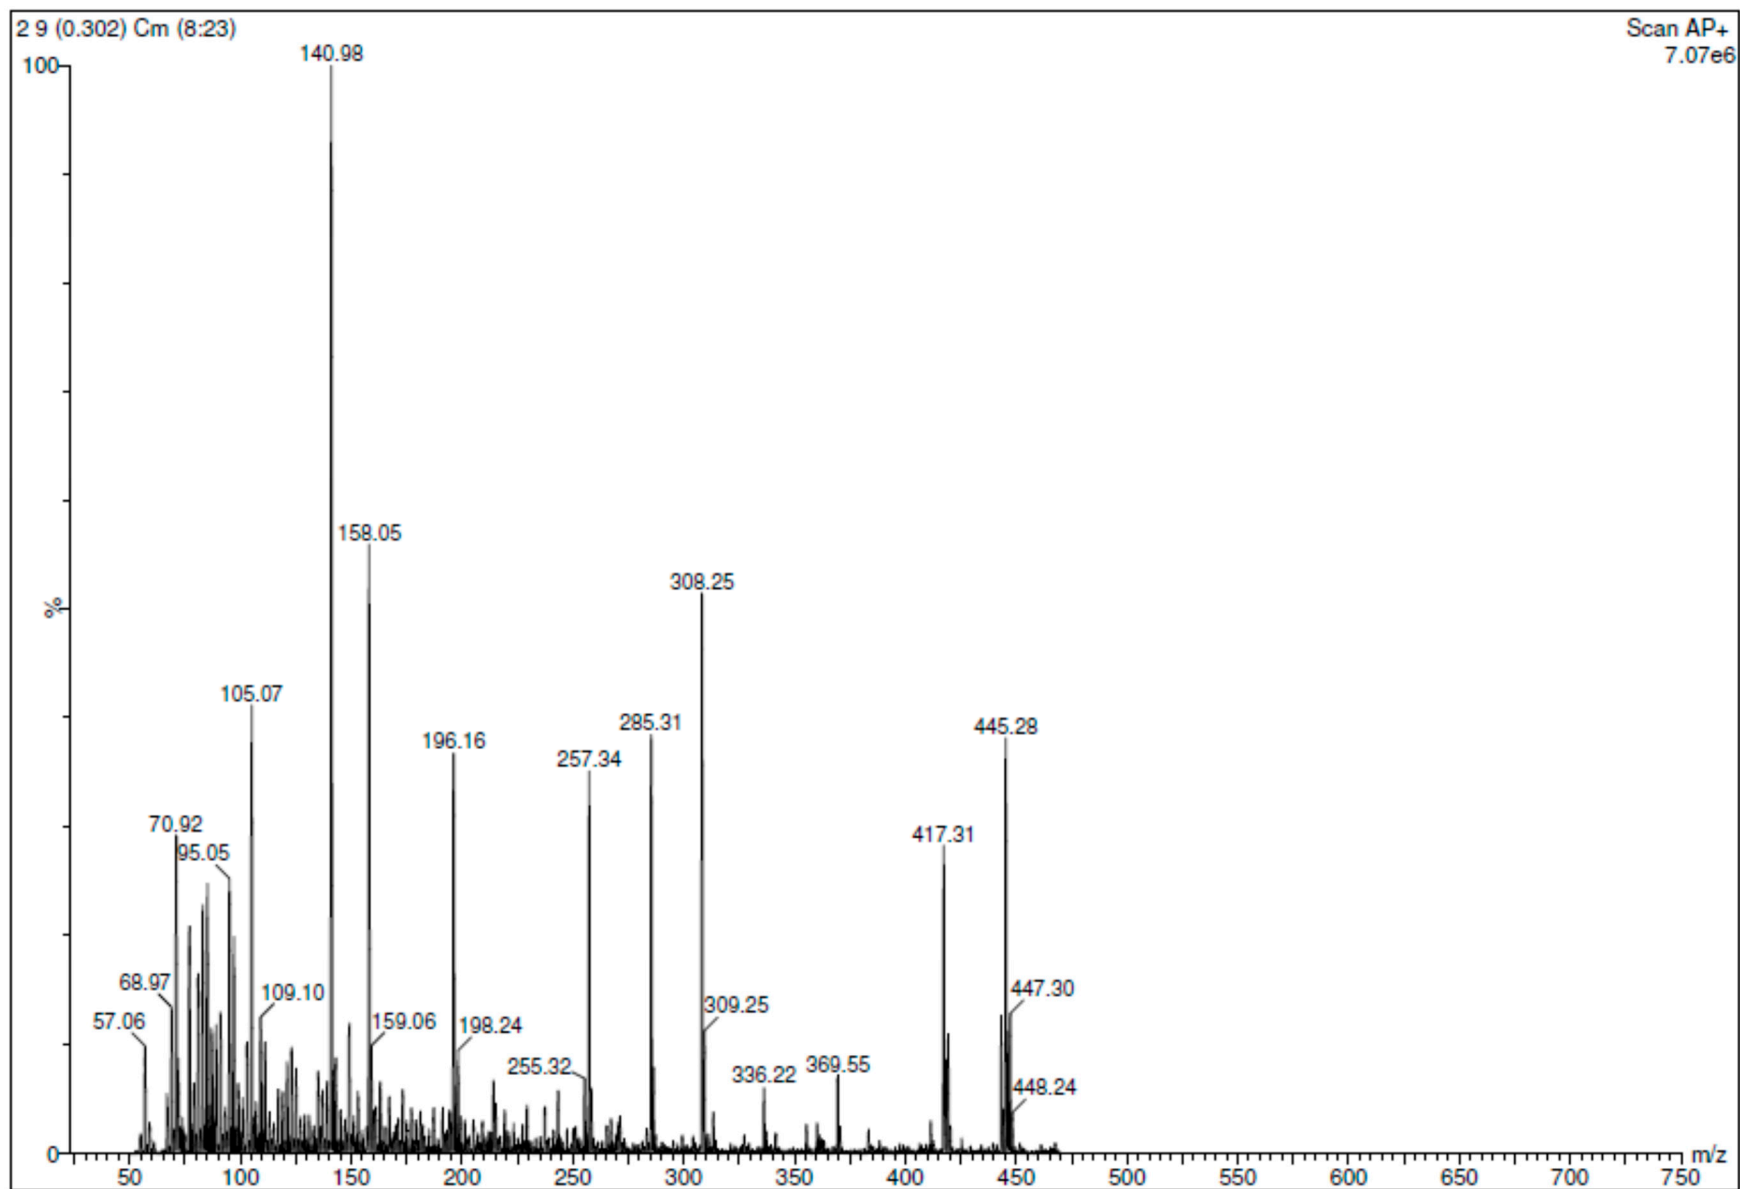

Figure S107 - MS spectrum of 7i

Table S13 - Fragmentation positions for peaks in MS spectrum of 7i

| <u>m/z</u>                 | <u>Fragmentation position</u>                                                                                                                                            |
|----------------------------|--------------------------------------------------------------------------------------------------------------------------------------------------------------------------|
| 445.28 – 448.24 (isotopes) | $[M+H]^+$                                                                                                                                                                |
| 417.31                     | 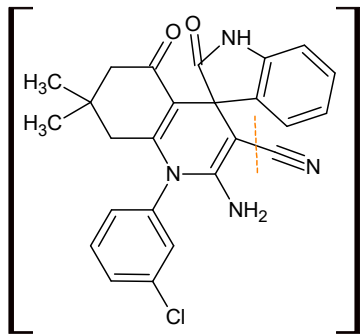    |
| 308.25                     |     |
| 336.22                     |   |

1.28. Product 12: 1-[4-[(4-bromophenyl)(1*H*-indol-3-yl)methyl]phenyl]-7,7-trimethyl-4-(3-nitrophenyl)-4,6,7,8-tetrahydroquinoline-2,5(1*H*,3*H*)-dione

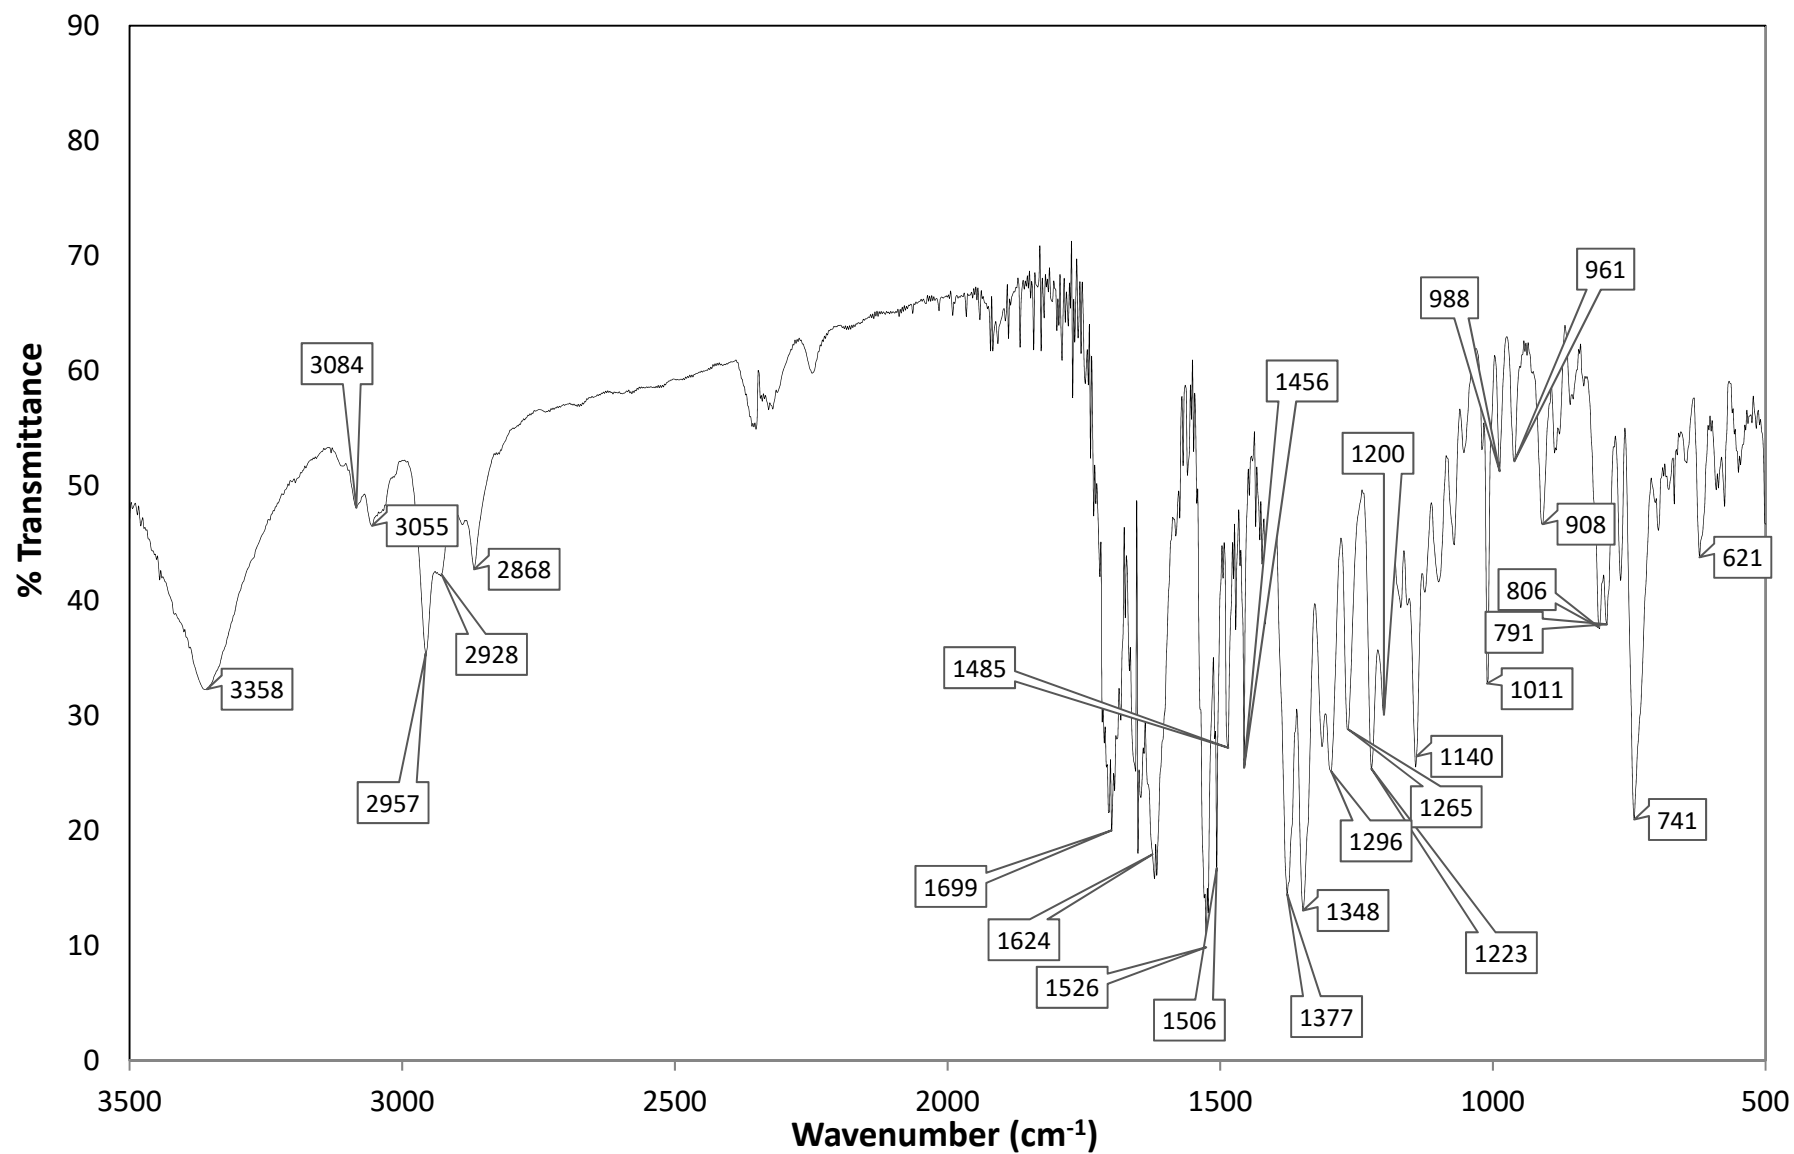

Figure S108 - IR spectrum of 12

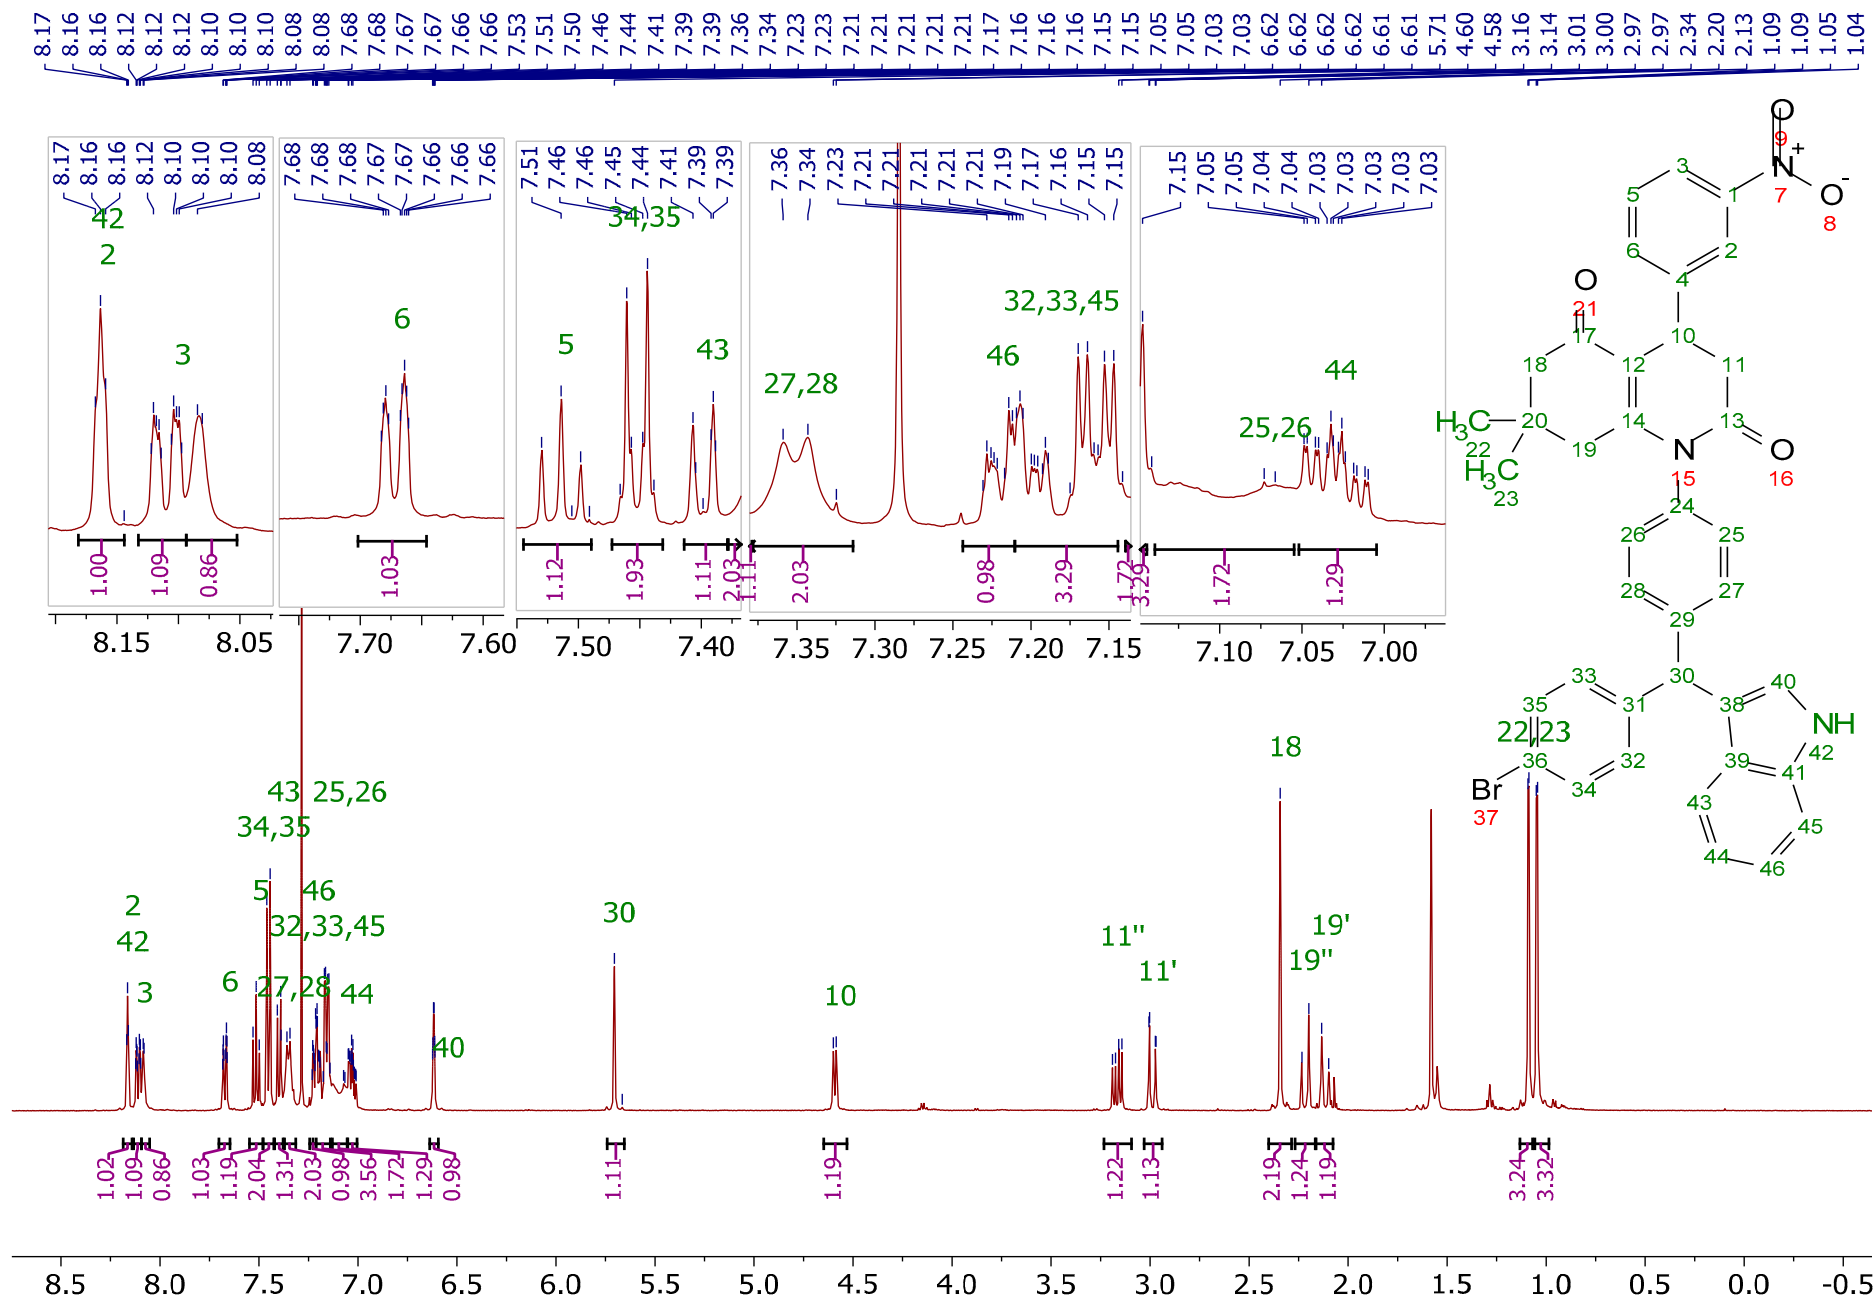

Figure S109 -  $^1\text{H}$  NMR spectrum of 12







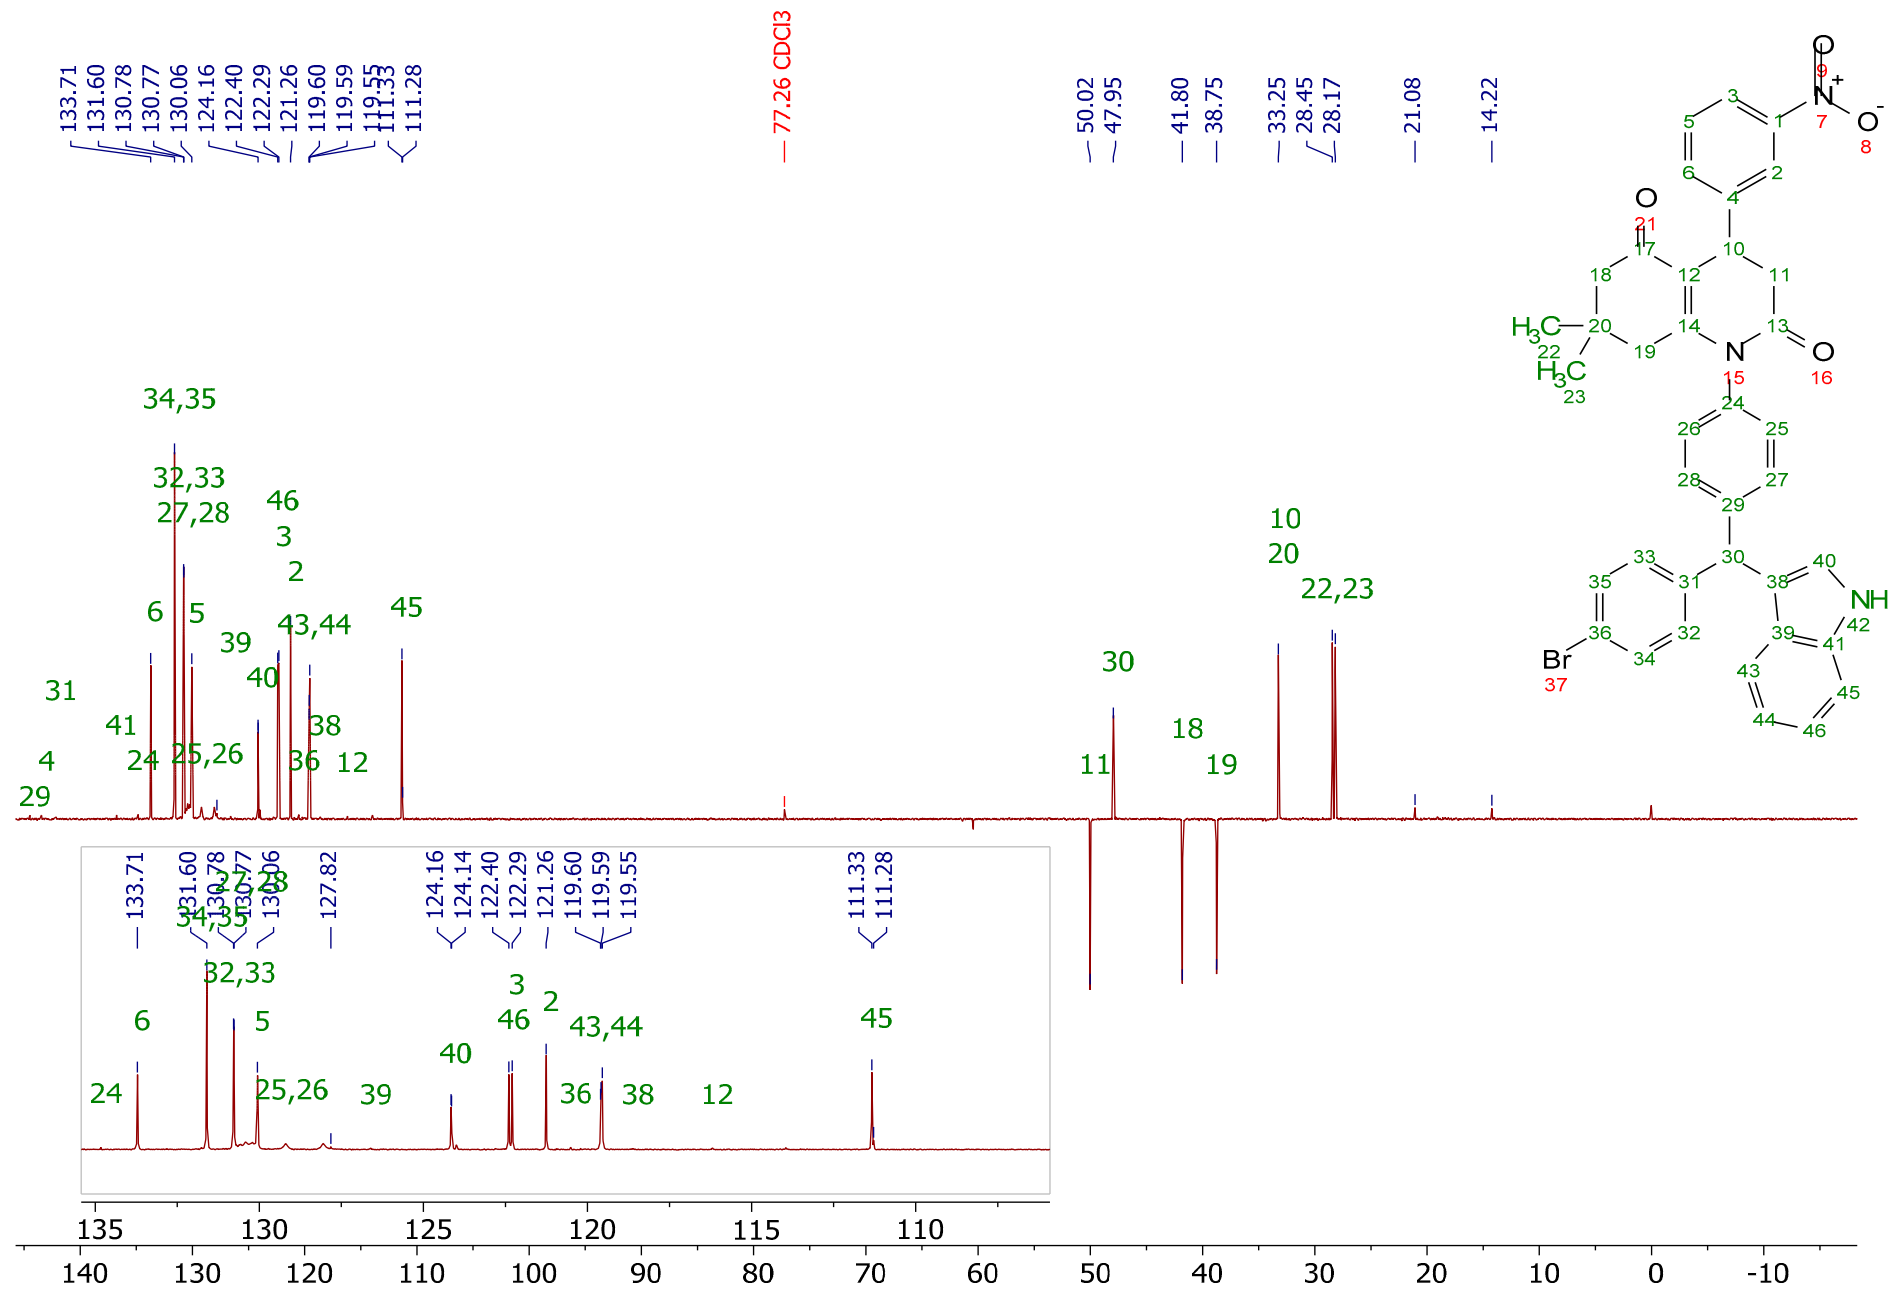

Figure S112 - DEPT spectrum of 12

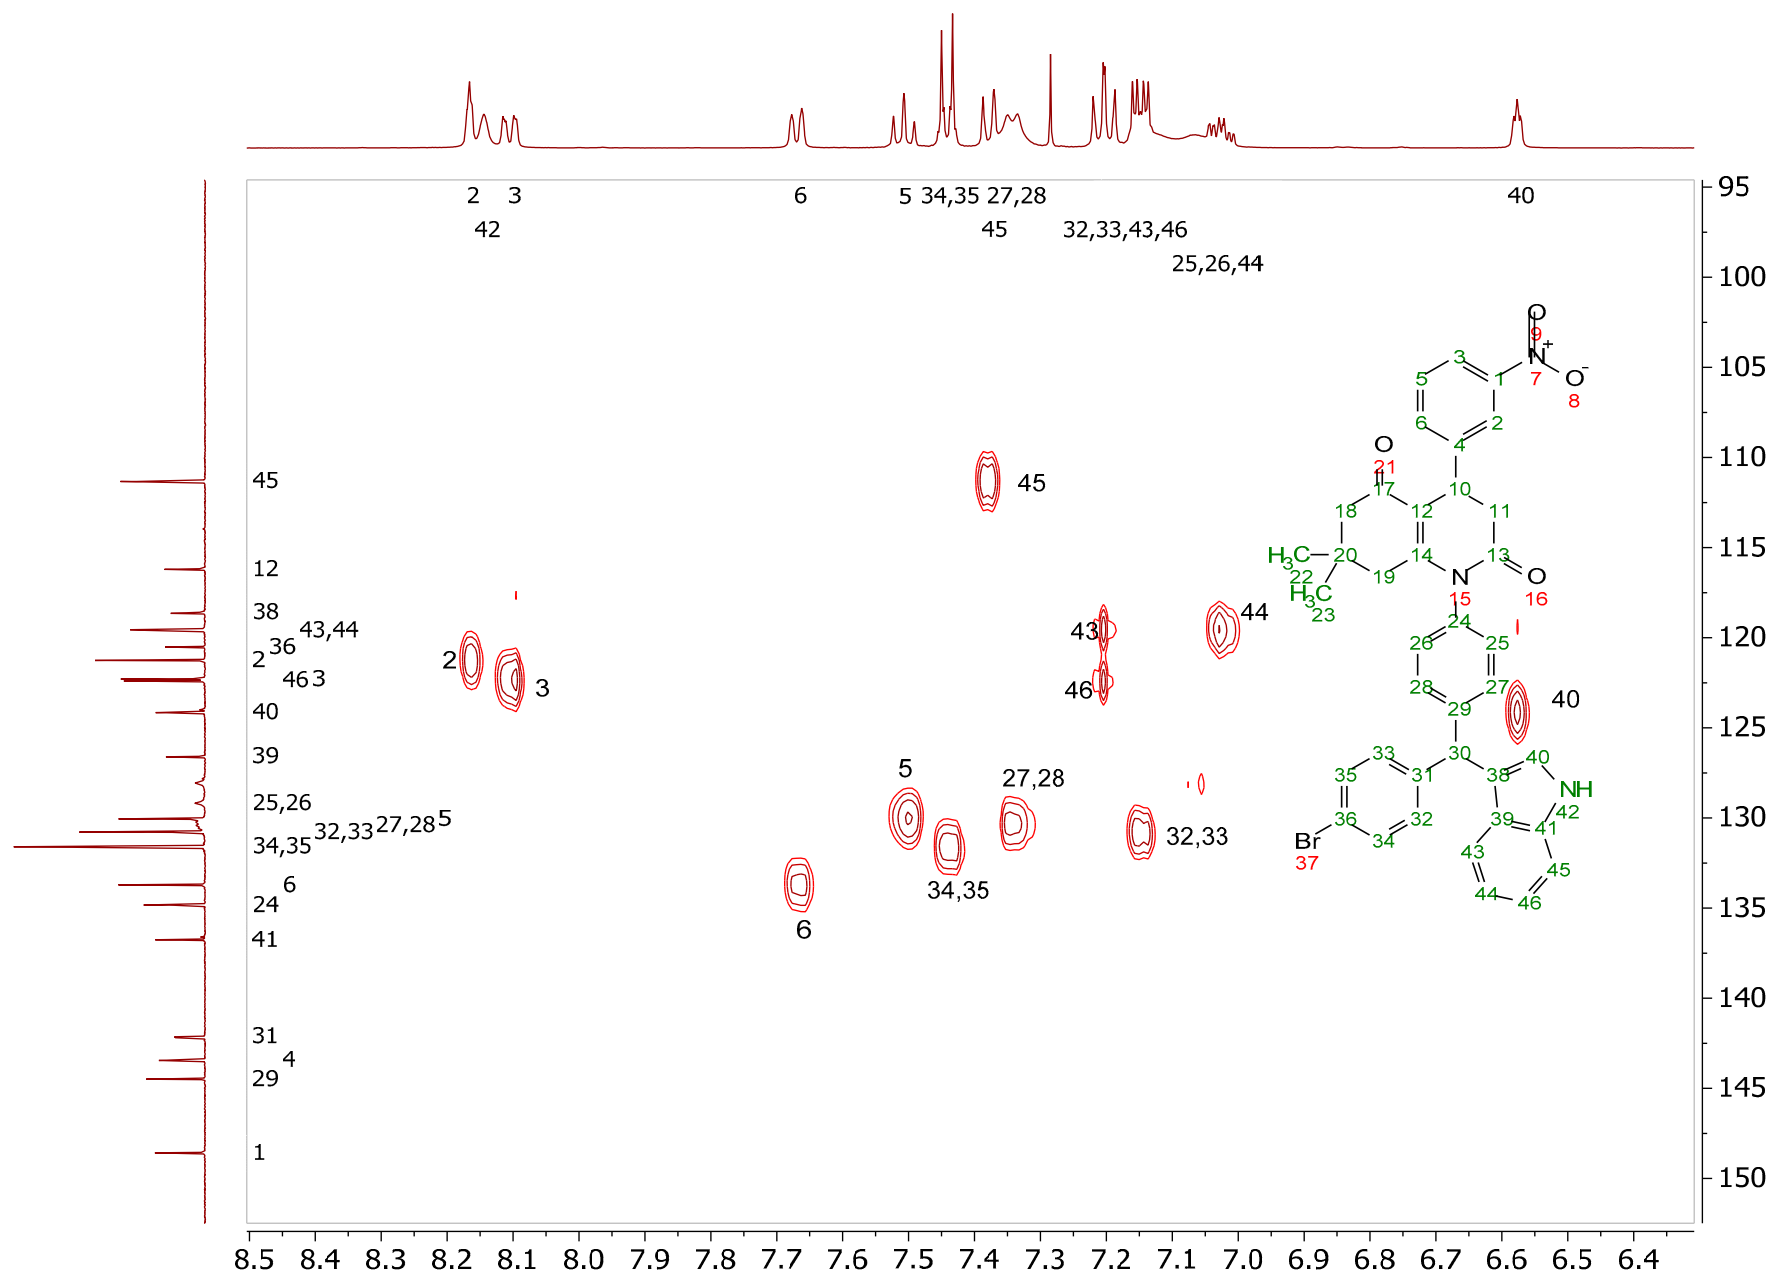

Figure S113 - HSQC spectrum of 12

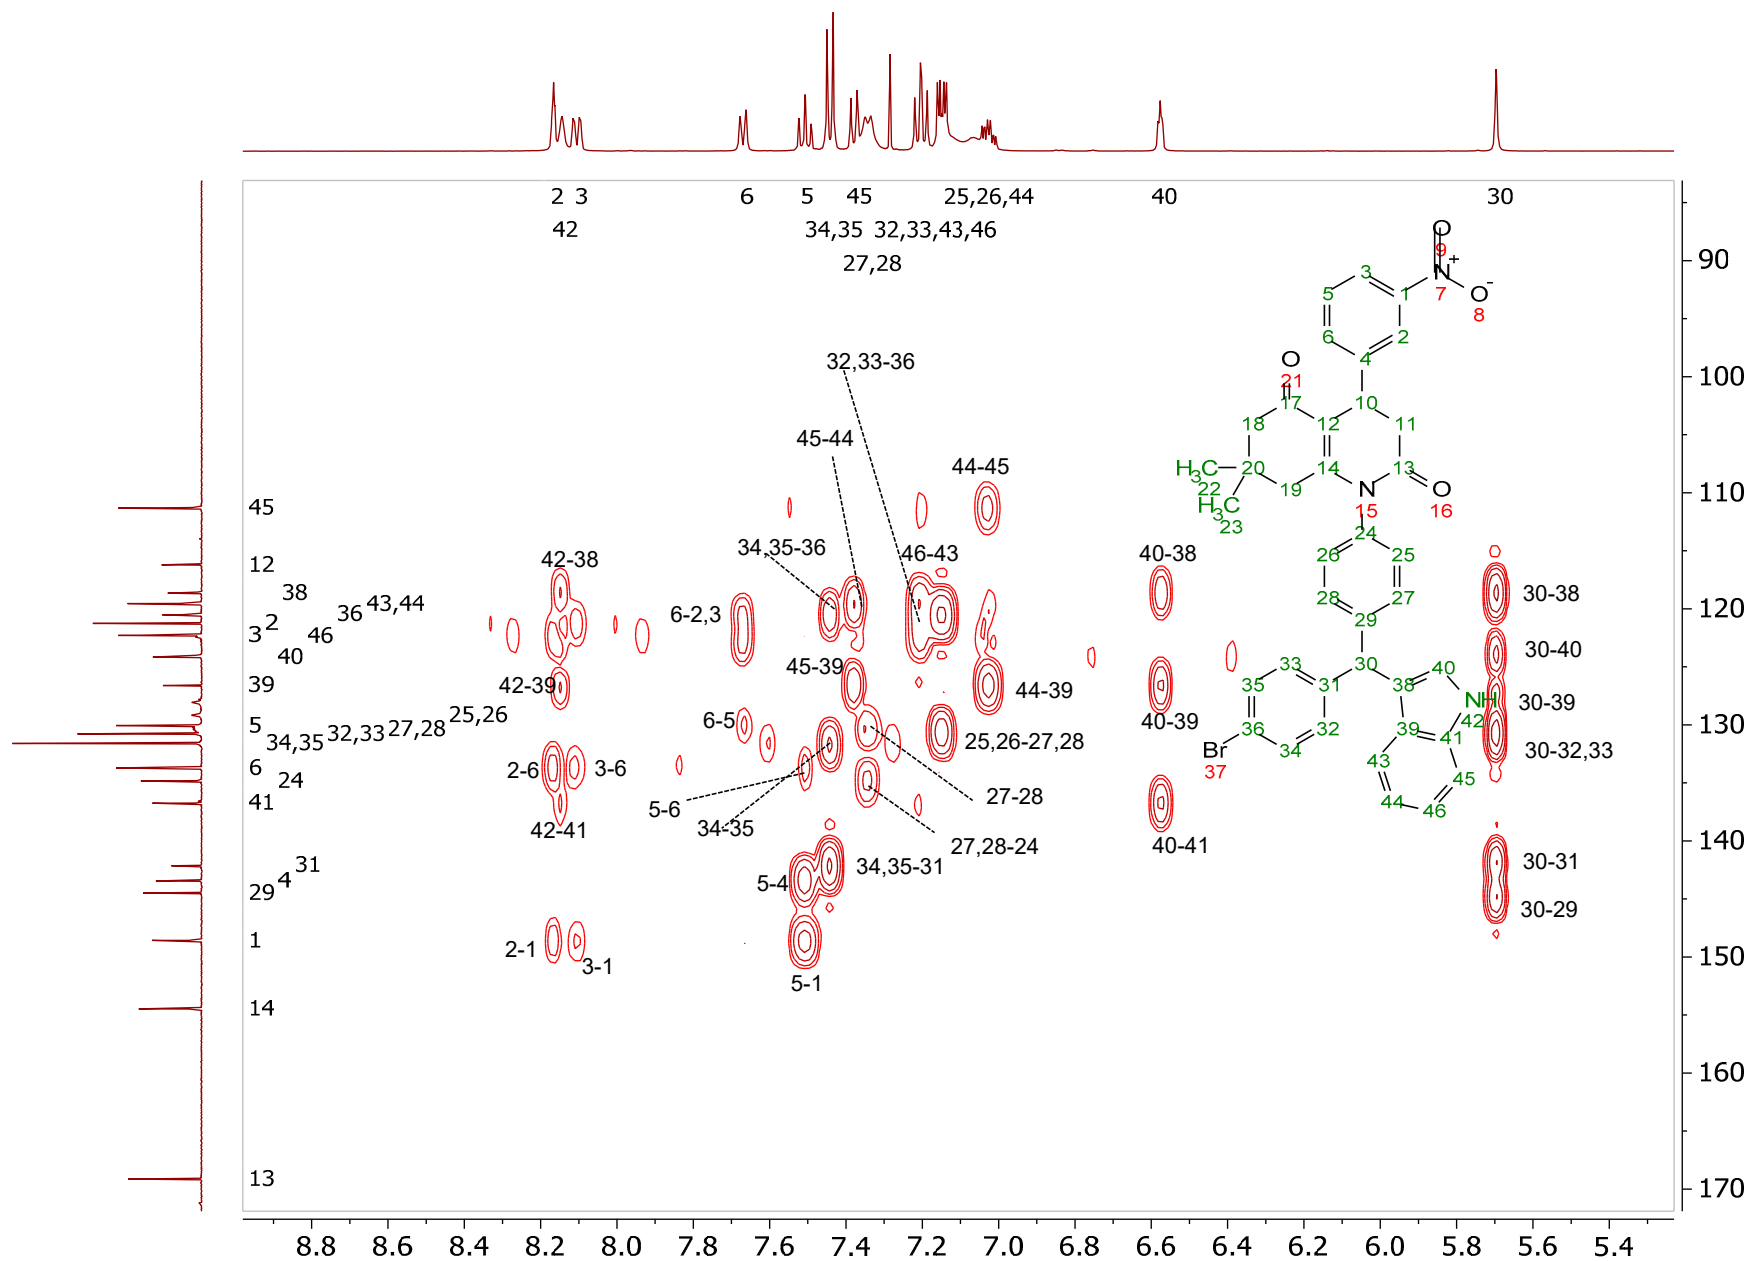

Figure S114 - Downfield region of HMBC spectrum of 12

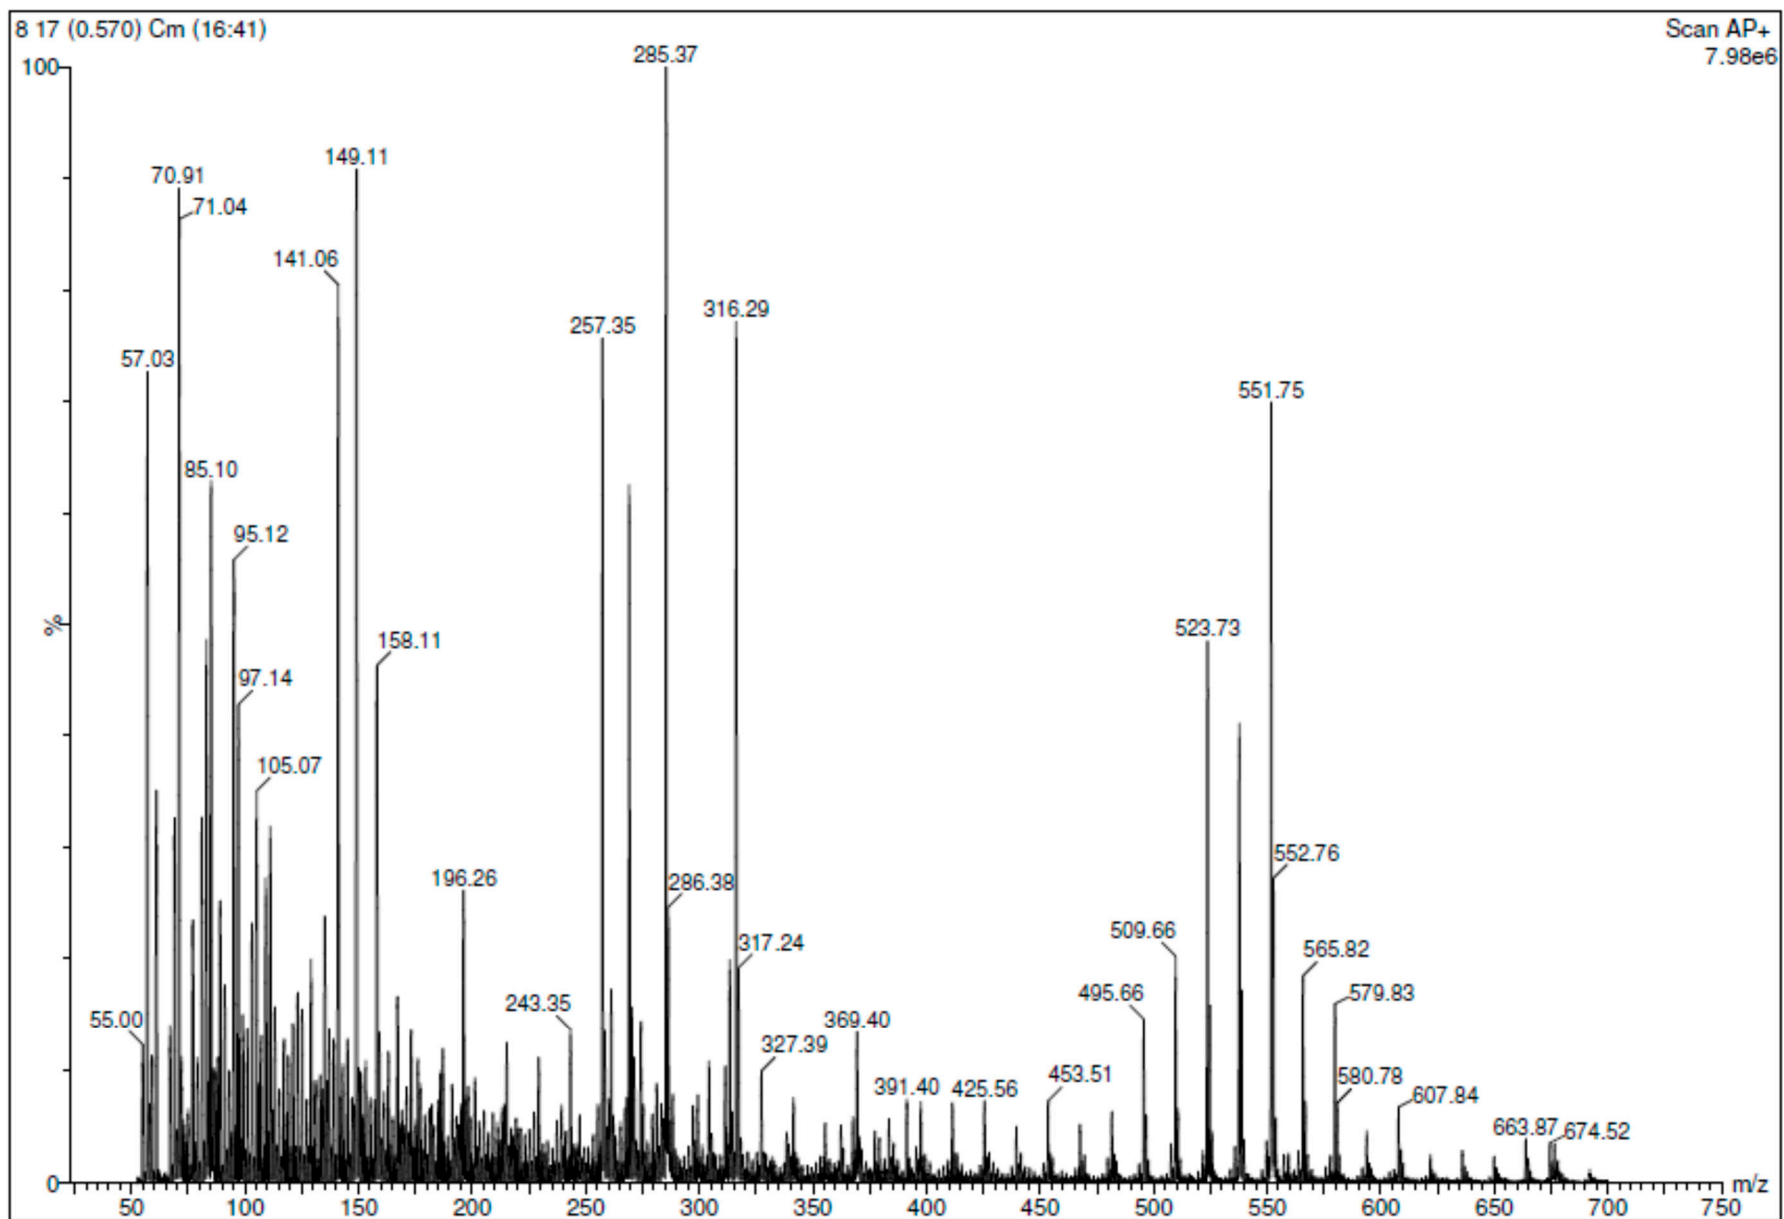

Figure S115 - MS spectrum of 12

Table S14 - Fragmentation positions for peaks in MS spectrum of 12

| <u>m/z</u> | <u>Fragmentation position</u>                                                       |        |                                                                                      |
|------------|-------------------------------------------------------------------------------------|--------|--------------------------------------------------------------------------------------|
| 674.52     | 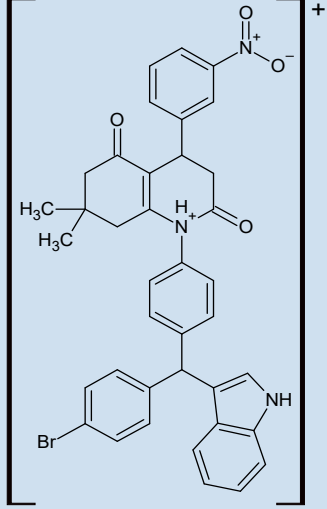   | 579.83 |   |
| 607.84     |  | 565.82 |  |

551.75

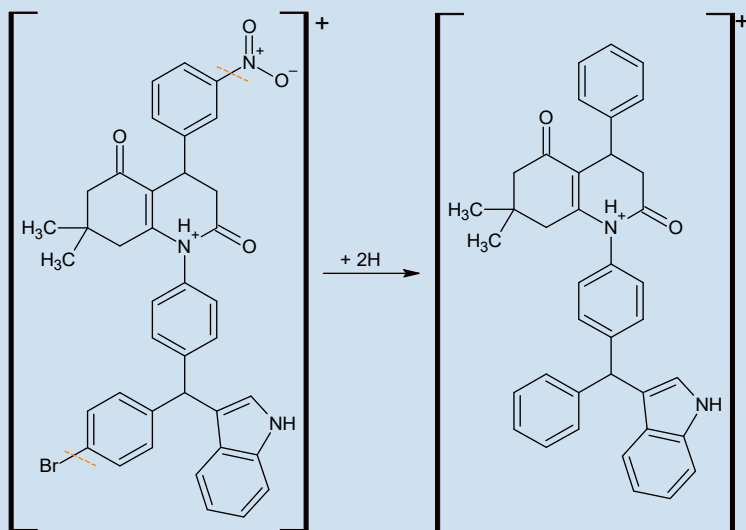

523.73

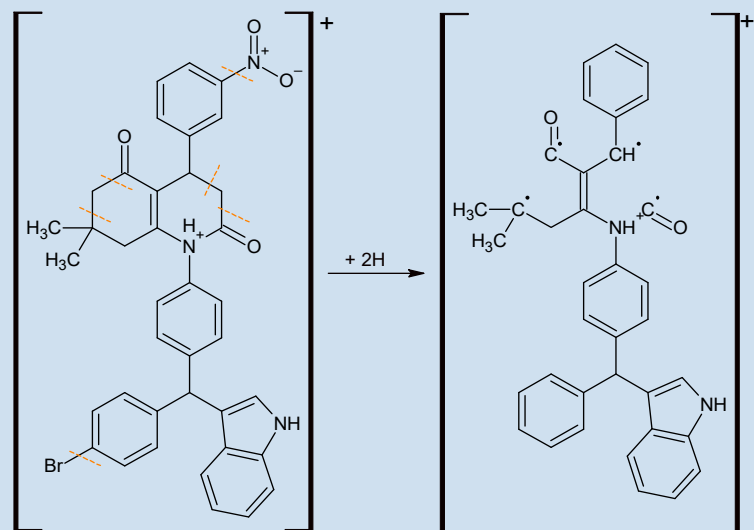

534.46

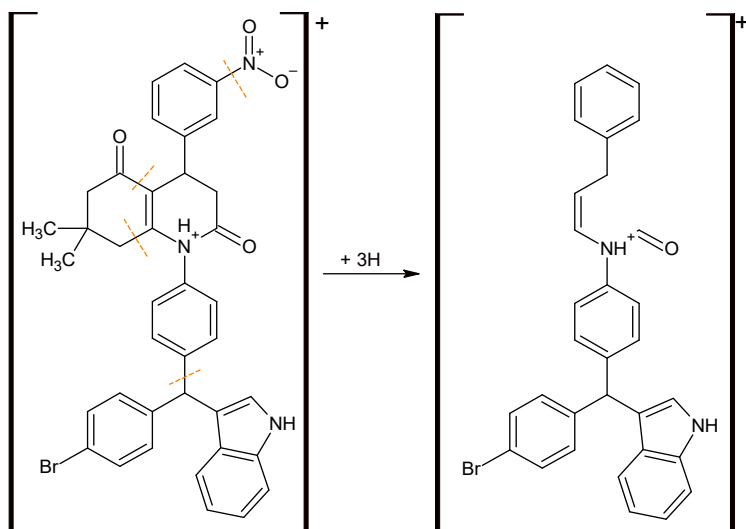

453.51

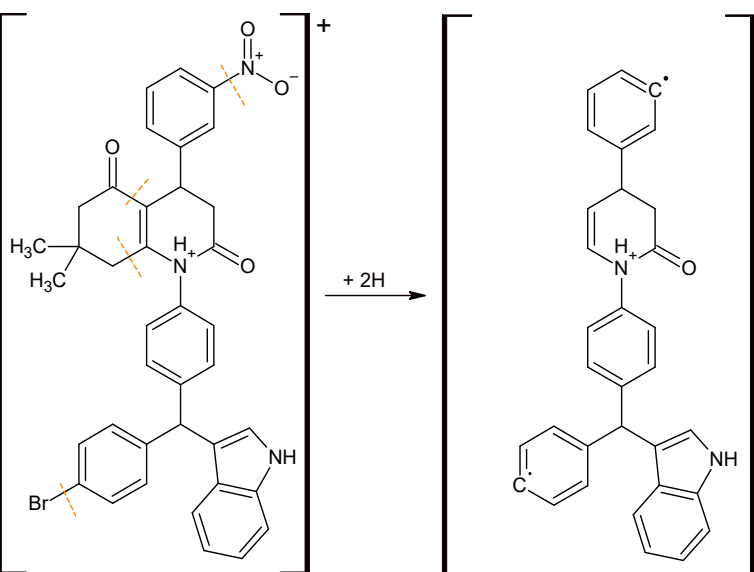



391.40

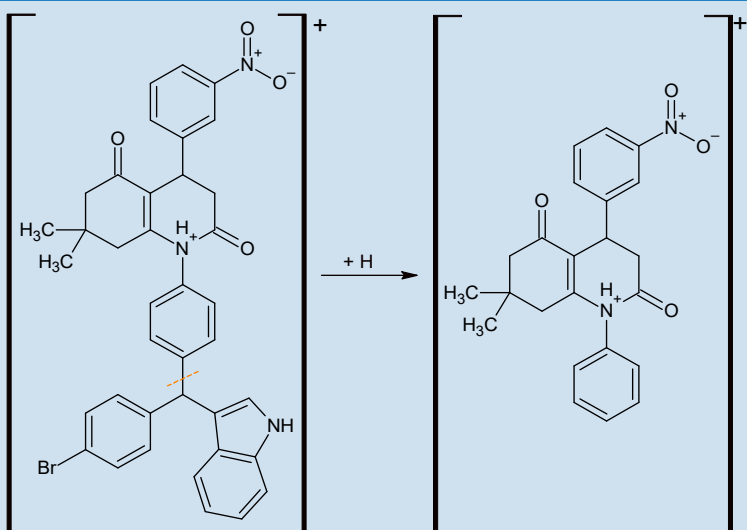

1.29. Pip-Agar catalyst

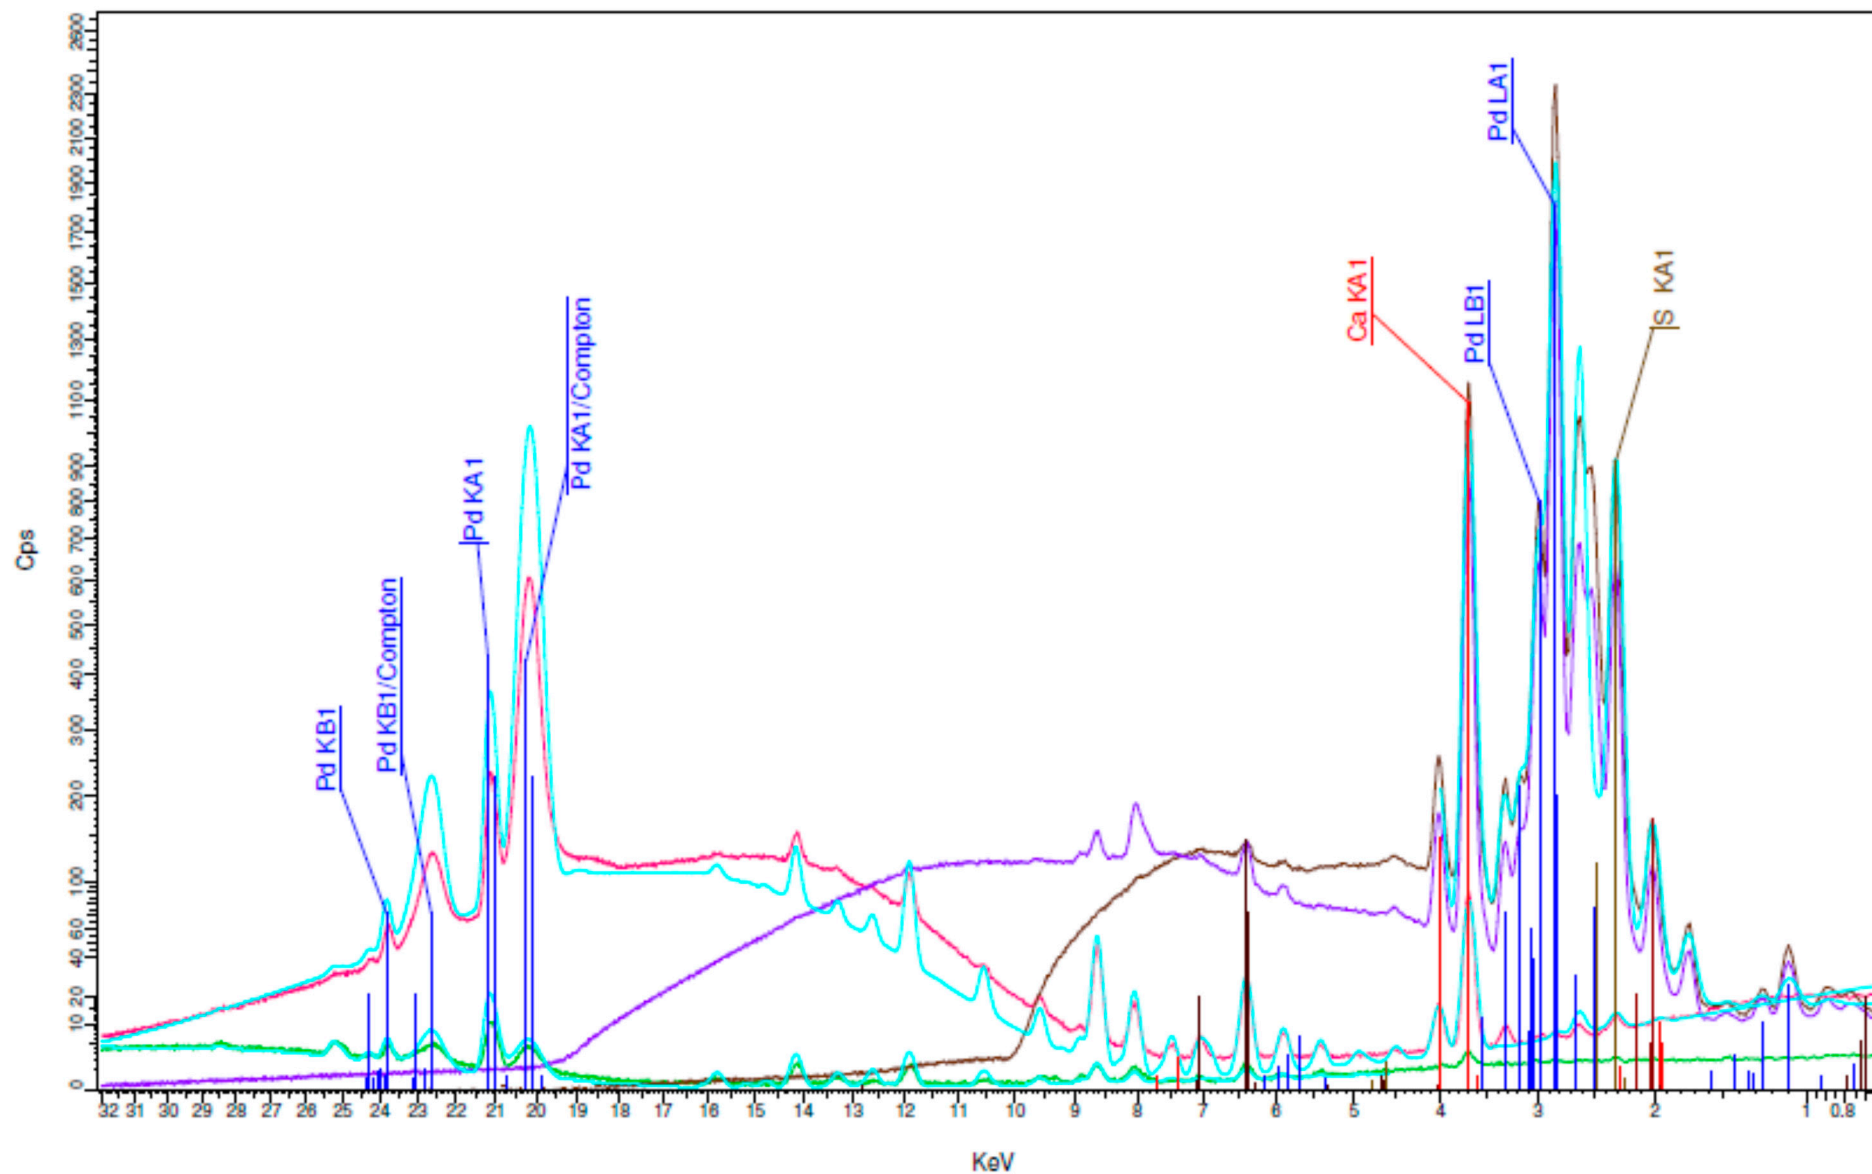

Figure S116 - XRF spectrum of Pip-Agar catalyst

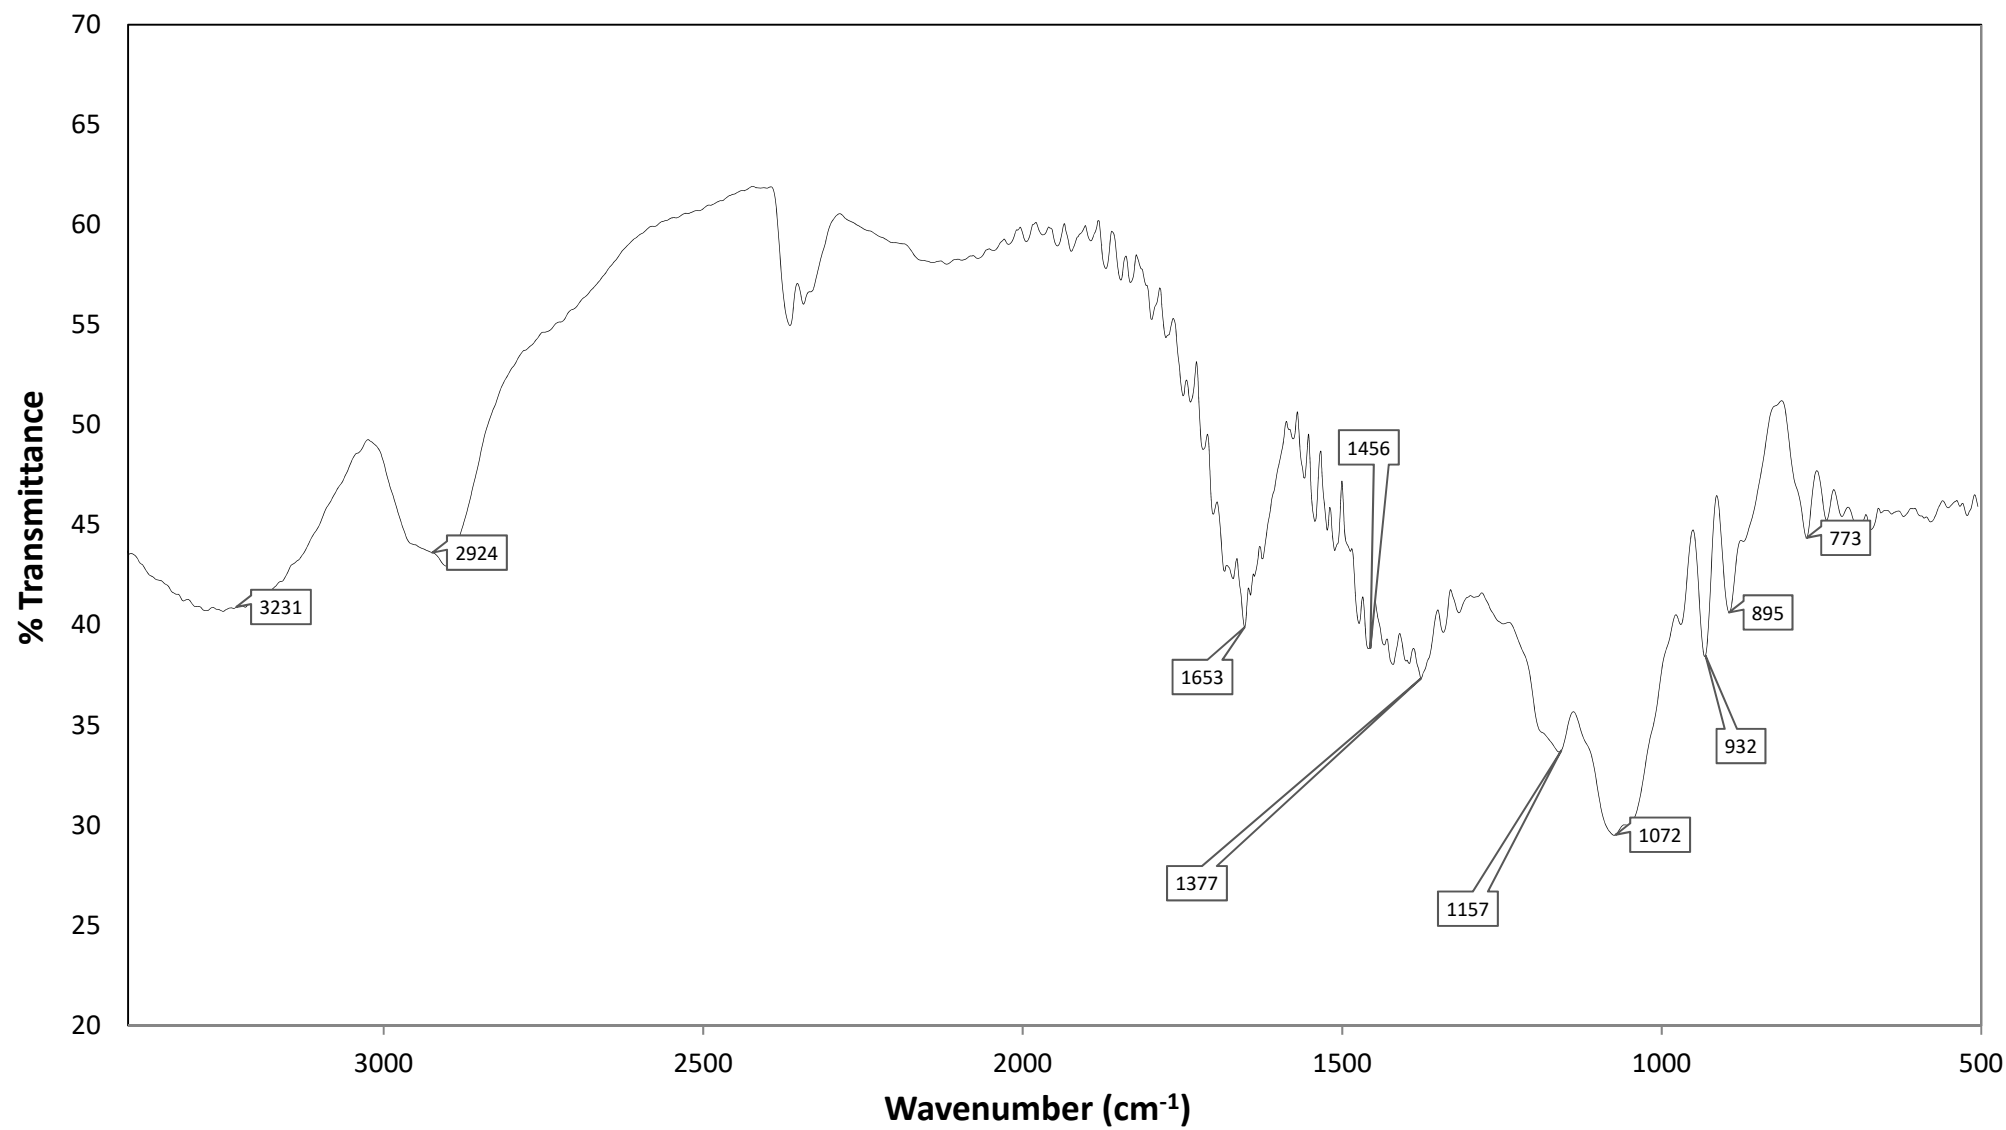

Figure S117 - IR spectrum of agar

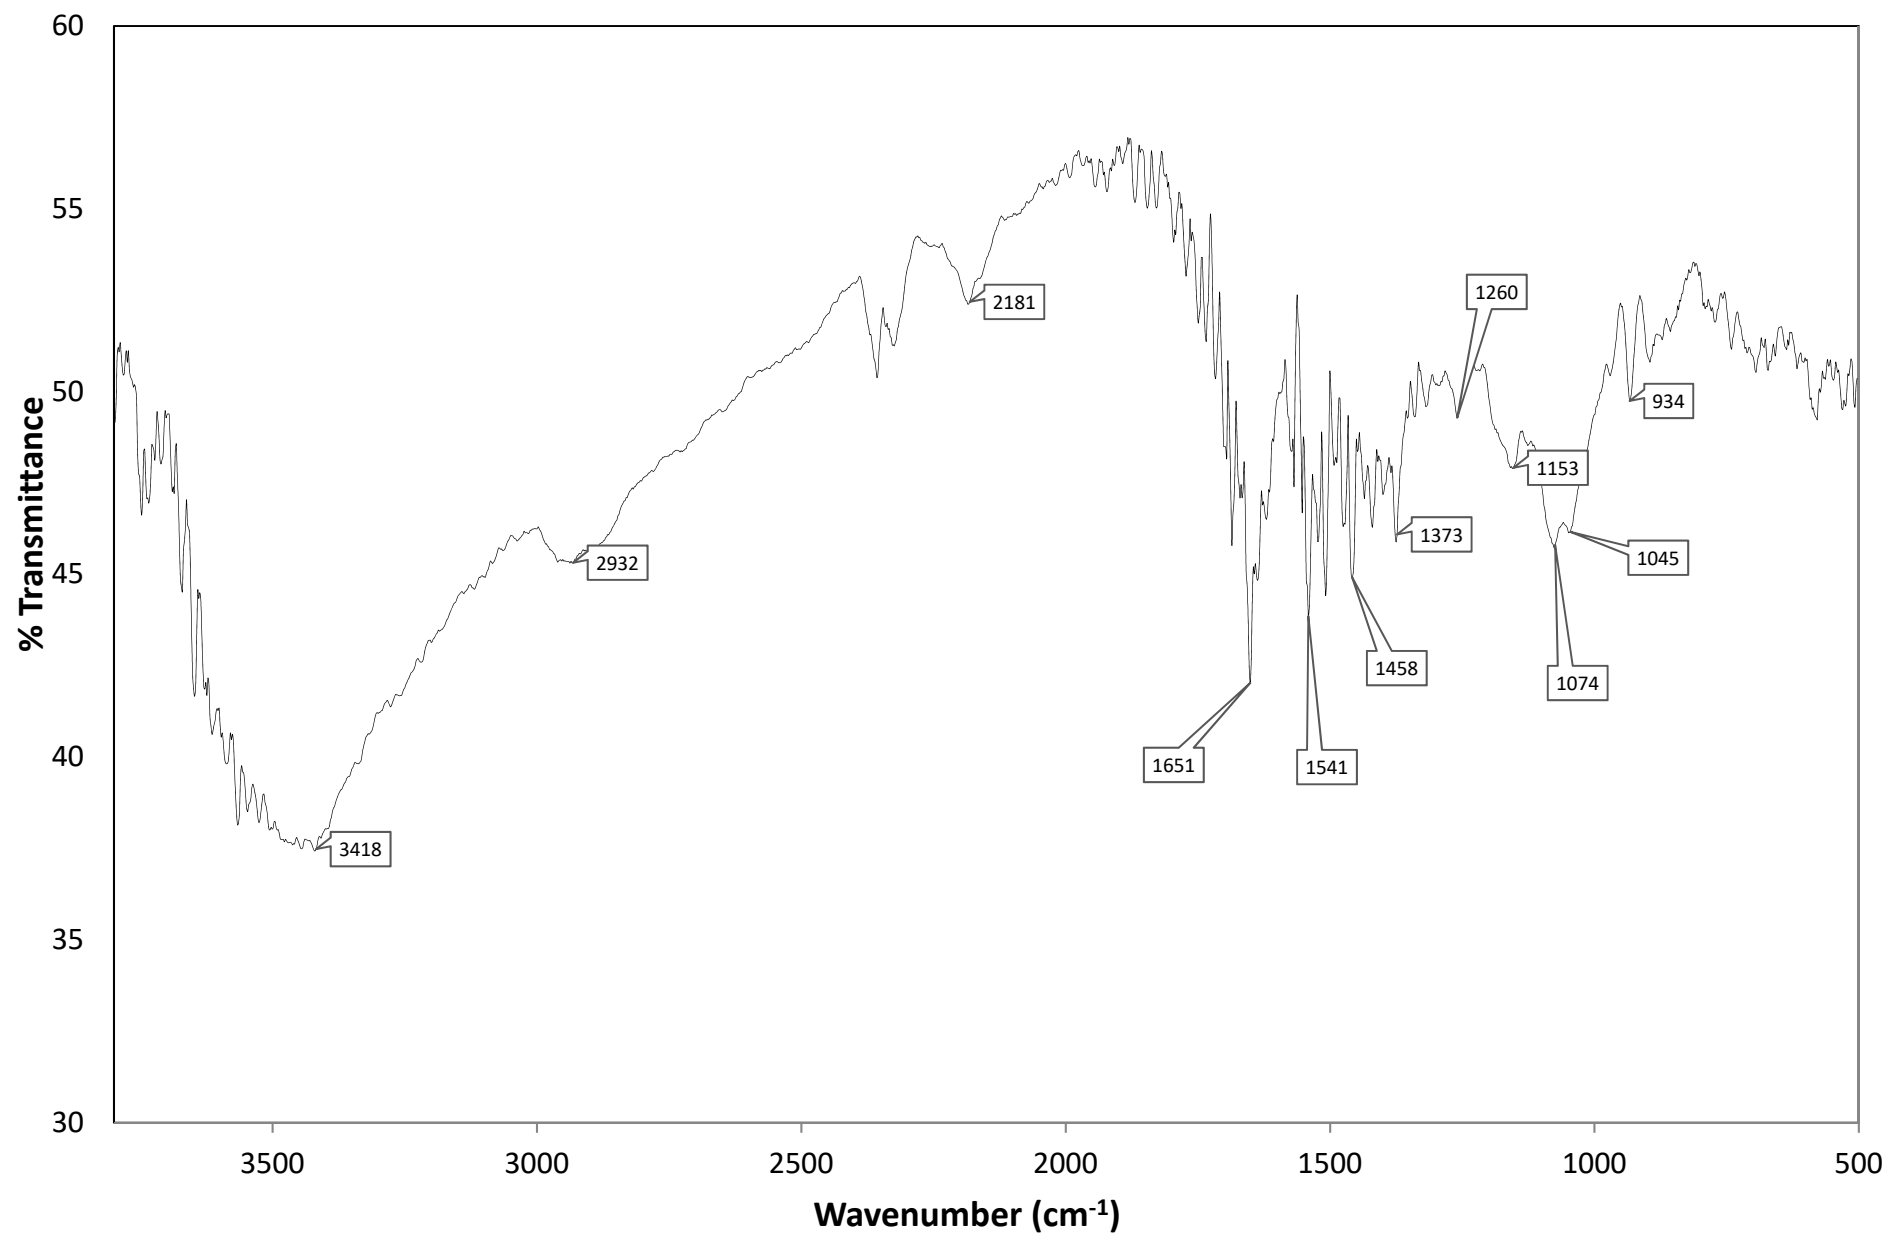

Figure S118 - IR spectrum of fresh Pip-Agar
